# Supplementary material for: Lipidome remodeling activities of DPA-EA in palmitic acid-stimulated HepG2 cells and the in vivo anti-obesity effect of the DPA-EA and DHA-EA mixture prepared from algae oil
Source: Front Pharmacol. 2023 Mar 29;14:1146276. doi: 10.3389/fphar.2023.1146276 (PMC10090563; doi:10.3389/fphar.2023.1146276)
Supplement: Supplementary file 2 [file DataSheet1.XLSX]

## Sheet: peak areas of lipid in pos mode
id	MS2 name	Retention time (s)	mz	Ctrl_1	Ctrl_2	Ctrl_3	Ctrl_4	Ctrl_5	Ctrl_6	Ctrl_7	Pal_1	Pal_2	Pal_3	Pal_4	Pal_5	Pal_6	Pal_7	Pal+Cel_1	Pal+Cel_2	Pal+Cel_3	Pal+Cel_4	Pal+Cel_5	Pal+Cel_6	Pal+Cel_7	Pal+DPA-EA_1	Pal+DPA-EA_2	Pal+DPA-EA_3	Pal+DPA-EA_4	Pal+DPA-EA_5	Pal+DPA-EA_6	Pal+DPA-EA_7	QC01	QC02	QC03	QC04	QC05
1	PC(3:0/39:0)	621.598	874.72	1507.04	1311.43	1599.55	1395.87	1329.12	1206.27	1104.91	1198.92	1700.46	847.335	1240.42	913.67	1472.07	1299.81	2499.36	1079.87	1454.63	2517.11	2071.67	2234.89	3347.26	6731.08	2955.32	7857.59	3959.96	3301.51	3550.64	3087.3	3311.58	2786.16	2680.01	2558.63	3030.36
2	PI(2:0/33:0)	395.668	870.599	1017.87	851.605	962.423	1064.45	977.282	963.685	733.197	2033.82	2598.79	925.72	1425.76	1036.69	1922.02	1503.9	2975.01	931.911	1076.52	2558.16	2016.16	2068.05	3038.81	4099.85	1605.43	4569.61	3109.74	1749.19	4127.44	1597.37	1817.88	1835.01	1616.71	1768.31	1730.77
3	PI(2:0/32:0)	366.108	856.571	3453.75	4861.24	4722.78	4451.38	4253.15	4331.16	2309.05	4200.87	4023.55	2232.52	2973.58	2063.3	3376.79	3270.91	7982.24	2831.11	3214.42	5102.52	7716.76	6316.58	10515.9	6012.83	3995.93	5516.47	2995.84	2266.2	8985.29	3359.28	4131.38	4522.19	4897.05	6819.96	4120.78
4	PI(2:0/31:0)	358.156	842.569	2735.7	2450.53	2215.31	2622.53	2087.52	2673.46	2095.19	5905.56	5933.03	4566.04	4728.99	3250.08	4335.41	7912.4	6618.47	2414.15	3191.44	6186.37	5840.93	5061.36	8856.94	11290	7407.26	11459.2	6193.39	7935.18	7549.54	5679.2	6443.98	7433.64	8560.09	5968.47	8279.97
5	PI(2:0/30:0)	332.877	828.555	13124.4	17539.5	16393.5	17552.3	23084.2	14811.6	10236.3	248966	267905	121977	192743	135079	241832	225331	296816	108717	170944	313115	211795	230450	345826	495866	243038	546450	330490	311360	368824	265360	266784	242731	248368	230219	250753
6	PI(2:0/28:0)	279.21	800.522	346.039	327.355	368.851	337.785	340.352	320.976	213.398	1673.04	1724.72	693.705	1087.07	874.179	1122	1444.29	1658.87	621.711	883.374	1662.35	1036.88	1191.07	1698.82	4016.48	2024.4	3635.99	2526.27	2250.7	2700.51	1773.42	1666.83	1559.34	1725.1	1516.08	1443.14
7	PC(2:0/26:1)	358.007	676.486	2787.05	4007.84	2905.01	2803.46	5516.54	3637.17	2350.18	6038.63	5015.25	2588.84	2212	2981.35	875.872	3060.6	2021.24	1349.87	1312.27	1808.14	2350.82	1839.75	2801.53	8504.36	3017.47	5624.06	3294.34	3469.81	6327.75	3046.71	4713.18	4068.06	4258.32	3503.77	5754.34
8	PI(6:0/26:1)	288.628	826.539	7687.18	7148.8	6362.04	6689.32	6563.55	6351.36	4273.28	55928.4	54683.5	22838.4	43469.4	24142.2	41694.8	41730.5	30933	9372.32	19444.8	36271.3	18738.7	20771.7	28255.5	105037	49816.6	80066.5	53434.3	55670.4	57198.8	37616.9	40196.7	36697.7	34793.2	37350.6	33395.8
9	PI(8:0/26:1)	368.835	854.56	22688.7	22012	28448.7	30007.1	23171.8	22269.4	15138.8	28774.7	19110.6	10936.9	13364.1	9882.49	14528.9	13856.4	28474.9	11774.3	16769.3	28104.2	30725.3	23394.4	39950.7	30015.8	13657.6	36175.1	27304.7	12735.2	28170.8	14522.1	18916.3	20579.6	23766.9	19486.2	25783.4
10	PI(9:0/26:1)	363.407	868.584	10858.4	8818.64	8775	11122.8	9781.97	10002.3	6110.25	16997.3	14095.4	7405	10716	7385.12	12876.8	10645.3	14504.5	5373.1	7268.58	14191.3	13397	10973.6	19371.3	42174.9	12327.4	37356.8	18624.8	17407.5	26803.8	11773.8	14784.1	15747.7	13771.8	15654.2	12815.4
11	PI(10:0/26:1)	360.762	882.592	5235.24	5655.54	4141.58	5392.38	4171.05	4564.9	3012.04	8074.41	9607.14	4043.67	5913.74	3308.02	6278.66	4983.61	7452.42	2931.14	3461.5	5727.17	6014.06	5334.6	7125.15	13020.9	5028.37	12691.4	6461.13	5732.83	8087.41	5335.87	7258.87	6823.78	6798.37	6127.99	8009.76
12	PI(11:0/26:1)	408.094	896.614	2293.15	2357.75	2306.58	2441.51	2394	1861.46	1582.67	3477.24	3169.97	929.035	2352.65	1570.61	2354.62	2427.29	2949.93	1021.59	1289.18	2699.24	2209.79	2178.82	3327.63	6663.12	2810.02	5764.8	2489.19	2555.05	3639.09	2601.61	3370.16	3422.67	2972.42	2750.26	2855.5
13	PI(12:0/26:1)	396.397	910.622	4086.47	4029.08	3756.47	4412.32	3660.25	3264.37	5040.9	6391.09	5370.51	4819.07	4236.82	2595.12	4835.85	3686.03	4806.67	1963.73	2731.5	4460.78	3873.6	3898.35	5100.28	9294.83	7858.57	8218.66	4295.77	4959.28	5157.76	7765.88	8687.12	5038.71	10199.3	4482.77	9821.81
14	PI(14:0/26:1)	465.758	938.661	929.98	796.503	805.505	618.229	821.945	789.541	422.793	1059.54	1306.3	618.077	628.414	406.375	1102.51	998.905	1406.31	410.566	590.403	1582.09	504.77	825.953	761.845	1177.36	976.559	1748.67	1170.89	712.916	1762.2	1313.07	1406.43	1405.45	1066.85	1430.48	1060.4
15	PI(14:0/26:2)	436.753	936.647	3832.92	4508.1	3894.4	2943.04	3746.04	3926.68	2629.37	3614.25	4268.84	1714.91	3568.07	1874.41	3698.88	2649.6	3208.63	1580.57	1650.22	3235.62	3239.49	2470.77	4801.59	6945.42	2623.67	7193.74	2980.7	2795.87	3851.46	3200.04	3647.59	4487.47	3462.77	3467.55	3773.41
16	PI(14:1/24:4)	314.726	902.568	3262.39	2825.14	2425.3	2972.22	2307.5	2093.28	1535.15	8730.28	7536.77	3781.05	6167	3618.58	6759.77	5891	4455.21	1400.23	2333	4434.05	3183.96	3089.49	4735.9	15818.4	6607.11	12307.8	7774.09	7105.3	9820.2	5853.81	6739.32	6104.74	6477.39	6025.17	5757.22
17	PI(12:0/26:2)	396.694	908.615	18996.2	21016.1	17662.1	36253.8	18061.2	19802.1	11219.3	30374.1	28985	14936	36280.6	14459	25919.9	16443.2	23321.8	9066.92	10346.9	21564.2	18337.7	18472.7	25800	50425.8	20092.8	78541.7	24548.8	21522.7	32318.6	33910.4	24879.5	24124.3	22726.5	22077.8	24733.7
18	PI(16:1/24:4)	348.441	930.6	11445.2	13379.7	9211.75	10310.9	8474.54	10284	6503.56	14520.8	14143.2	7061.32	11007.2	7165.72	13958.2	10948.2	14381.5	5244.92	6667.78	11627.7	9529.19	8946.13	13690.2	28314.6	11610.6	23522.2	11867.6	10953	15191.7	11352.8	13157.6	12266.8	13275.9	13206.3	12954.9
19	PI(8:0/26:2)	294.707	852.555	44974	37863.6	29698.7	30653.9	35074.6	28606.3	24085.1	55309	59088.3	21718.1	41704.2	25345.7	37930.9	40462.4	34082.7	10533.3	19534	33485.7	21320	22506.8	28797.5	71920.2	35864.8	67298.7	43104.5	38026.2	49899.5	28135.7	49037.6	48903.6	44237.1	47279.9	47026.4
20	PI(10:0/26:2)	322.282	880.578	4125.83	4071.85	3611.43	3772.19	3393.83	3250.59	2485.88	7095.09	7231.86	2887.92	5004	3483.86	5037.57	4770.64	8272.44	2866.21	4025.42	6403.54	6503.53	5996.14	8565.3	12116.2	5950.89	10050.7	6125.89	5904.83	7925.71	5425.45	6557.52	6321.17	6122.09	5902.91	5775.15
21	PI(16:0/24:4)	379.864	932.615	8182.9	7682.35	6675.34	7852.5	6190.86	4638.47	3580.34	8801.3	7708.25	4525.9	5390.76	3269.77	7051.81	6005.47	6509.19	3388.35	3848.7	8121.09	5626.96	6991.7	8802.08	17377.9	5792.37	12522.4	6439.07	4873.26	8892.76	9143.73	7997.54	7436.3	5696.02	6978.43	6093.79
22	PC(8:0/26:2)	418.383	758.555	262993	255626	1.51904e+06	1.5614e+06	203785	1.40896e+06	992870	1.68141e+06	1.94215e+06	757345	1.20567e+06	804831	1.45299e+06	1.16269e+06	1.40905e+06	642459	758379	1.38089e+06	1.48443e+06	1.02458e+06	1.60523e+06	2.26205e+06	508377	2.12677e+06	1.10422e+06	941959	1.38777e+06	903291	1.26328e+06	1.44685e+06	21038.4	1.69766e+06	1.58195e+06
23	PI(9:0/26:2)	320.504	866.569	4679.21	4179.25	3006.71	4106.86	3586.56	3186.09	2477.36	3109.18	3312.47	1426.59	2317.27	1483.32	2257.53	2302.04	2511.5	791.627	1304.24	2364.29	1724.59	1846.68	2451.53	5381.99	2598.33	5295.17	3162.84	3656.74	3553.42	2578.73	3785.26	3335.27	4052.84	3427.11	3804.04
24	PI(11:0/26:2)	369.502	894.598	5071.88	5612.24	5343.14	4369.21	6201.93	5064.74	3675.5	4057.41	7211.79	2829.81	3497.09	3226.83	3902.03	3108.21	5387.03	1747.28	2336.23	5373.98	4530.87	3562.17	6146.24	12071.8	5373.54	12000.7	9606.1	4371.49	6992.79	5368.72	5792.77	5225.73	4791.05	8406.8	5993.14
25	PI(14:0/24:4)	346.605	904.586	108285	86605.5	93352.1	96340.9	71353.6	57720.7	56922.7	224487	194850	106735	166267	93782.8	176787	157155	145101	46425.7	64560.6	116160	95487.2	93457	134541	289110	129669	237288	117807	122060	164527	116252	153428	142693	142243	130443	132563
26	PI(13:0/26:2)	418.403	922.629	2623.6	2340.44	2608.02	1806.41	2889.14	2683.66	1506.73	1838.85	3095	724.524	1513.41	540.496	1852.12	1026.11	773.006	507.095	368.163	1253	1047.45	1227.75	945.083	3085.08	763.881	1478.47	857.29	992.336	1834.42	356.286	1521.01	852.727	1993.96	969.106	1276.4
27	PC(4:0/26:2)	365.246	702.501	17334.1	17588.6	18794.4	21164.8	17321.1	20153.7	11144.2	23770.1	27394.1	14844.1	18123.4	14038.9	17232.6	17613.6	22091.2	9113.92	9856.85	22740.2	27410.2	19333.9	30110.8	37618.1	16026.2	34273.2	17214.1	12254.2	24911.2	17724.6	20382.1	19923.1	19423.4	18040.7	20318.7
28	PC(10:0/24:4)	301.375	754.532	8964.47	7757.49	7452.18	7512.44	6185.51	7481.59	5646.3	9247.38	10117.9	4119.38	6891.57	4113.57	5943.46	6858.49	7407.53	2840.39	3381.49	6674.56	7276.56	5612.76	8655.56	11912	5338.91	11237	5667.19	5230.07	7779.55	5240.19	8427.94	7705.06	8277.62	8087.58	7834.26
29	PI(12:0/24:4)	294.829	876.554	8520.2	7385.41	6601.33	6757.59	5431.46	4703.89	4175.56	37806.6	32870.7	16494.2	28082.4	15948.9	35103.6	27443.4	14161.6	4676.4	7847.37	13351.4	8098.22	9560.95	13317.5	37033.3	17505.2	30886.6	19270.8	18687.7	24641.9	14226.4	20982.8	20318.6	19515	20094.8	20408.2
30	PI(18:0/22:6)	334.075	928.584	7082.04	6504.56	5101.66	6161.62	5418.3	4101.23	3948.37	12575.7	12387.2	5893.06	10172.9	6323.37	12585.7	9376.15	12036.3	4257.89	5986.91	11132.2	9076.77	8821.36	13645.8	23370.2	9703.31	21224	11294.2	9752.03	12768.6	9323.97	10631.7	10990.6	12958.5	11378.2	10543.9
31	SM(d15:2/27:0)	505.692	835.663	752060	688864	728480	724449	666442	687046	457771	649964	731355	323995	461870	330978	380160	425100	451771	192844	201441	405271	336501	324575	464061	1.02331e+06	418923	741328	424631	385547	618536	425836	616329	597677	620239	585045	601337
32	PI(13:0/24:4)	345.891	890.568	2325.94	2040.37	2117.34	2280.14	1802.25	1533.22	1200.77	5382.95	3187.31	1648.39	2874.85	2539.31	3115.21	2423.22	3288.99	880.41	1154.48	2234.75	1664.53	2694.03	2159.69	8076.81	3129.53	6650.66	3276.39	3254.17	5267.65	4423.22	3405.77	2872.87	3284.01	2976.59	2711.7
33	PI(16:0/22:6)	281.595	900.553	628.835	661.61	635.192	677.711	576.356	659.328	387.684	2371	2493.22	1057.96	1648.63	1117.15	2007.12	1696.4	1741.01	723.299	910.896	1832.65	1358.05	1348.05	2117	3869.77	1775.16	3609.66	2010.99	1883.39	2382.9	1777	1651.73	1638.19	1830.34	1551.34	1452.37
34	PI(14:1/26:2)	401.16	934.631	3372.02	5073.24	3473.09	3451.51	4307.86	2909.78	1980.23	2638.14	2884.58	2214.76	2104.01	1346.01	2346.61	1917.94	1805.7	778.069	1513.77	2529.55	1860.84	1700.36	3034.47	5134.66	2039.35	4849.59	1532.01	1709.26	3554.99	1580.64	2793.63	3267.5	3393.22	2106.91	3128.32
35	SM(d14:0/18:1)	301.465	675.54	144132	123046	104593	102042	104971	88732.3	67108	84395.1	85576.6	30491.2	58440.4	35725.8	49200.9	54653.5	42978.2	15878.5	20281.7	40655.6	28929.2	30047.4	41877.5	127384	54606.9	99138.7	52928.8	50596.7	81442.7	51835.6	92730.4	87440.8	90827.5	86777.7	86476.9
36	PI(14:1/22:2)	334.17	878.564	5176.77	4786.25	4871.3	4512.85	4507.22	3982.9	3112.42	9035.43	8773.13	5852.21	7259.87	4930.32	8168.87	7784.02	16078.5	5542.7	6865.97	12725.1	12815.7	12177.3	15381.1	15290	8449.34	18559.3	9528.87	6747.82	9910.75	10184.1	7789.84	9134.23	9313.4	8954.14	6936.25
37	PI(15:1/22:2)	342.238	892.585	3310.59	2739.93	2298.8	2413.6	2409.52	2320.17	1608.89	4404.06	3624.99	1696.03	2759.82	3371.68	2860.64	2331.12	3016.49	1710.54	1373.94	4554.22	2008.8	1972.02	2543.34	7364.31	2501.16	6889.94	2537.25	2773.16	4590.6	3137.14	5627.63	4151.39	3363.39	3158.79	3902.65
38	PI(16:1/22:2)	346.498	906.591	16695.2	14310.2	12829.6	14588.2	11311.1	9080.47	8124.26	37089.2	26798.9	16602.8	21943.9	12961.9	23479.2	21421.9	20370.2	6648.79	9141.8	17049.8	13066.5	13708.2	20622.4	52875.3	17944.7	33330.7	17828.2	17161.9	24880	16059.9	29843	20479.6	20221.3	20201.4	20386.1
39	PI(15:0/24:4)	349.254	918.599	2301.22	1692.76	1358.2	1812.84	1493.51	1439.61	1205.2	1844.43	1463.83	632.25	1043.38	733.701	1328.09	1201.58	1469.68	490.453	640.417	1011.09	1011.09	813.251	1441.04	3552.23	1390.22	2521.62	1394.46	1224.21	1484.71	1078.36	1597.59	1834.36	1785.98	1553.87	1546.47
40	PI(13:0/21:0)	338.42	856.576	37460.9	32596	28198.6	36284.8	34922.7	30480.3	23267.9	97584.9	113605	52470.2	83185.5	53711.4	86388	74997.2	132652	42051.9	66457.9	119032	95778	82364.4	114485	193375	77129.9	170257	102825	87532.1	125285	83832.5	85518.7	92321.4	92244.6	84055.4	86268.1
41	PI(18:2/22:2)	348.388	932.607	2362.52	1864.62	2049.38	1941.2	1860.22	1580.74	1233.73	3608.51	2699.65	1471.11	2359.08	1398.72	2835.23	2268.08	3044.03	992.799	1372.49	3143.5	1987.5	1781.75	2679.1	6011.53	2333.33	4534.98	2493.6	2185.5	2980.39	2092.47	3062.11	2583.18	2664.52	2451.62	2731.29
42	PI(15:0/22:2)	427.248	894.606	2850.17	2638.47	2404.58	2060.24	2105.57	4769.82	1432.47	4724.97	4631.54	1946.21	3402.4	2761.19	4037.34	3593.79	6213.93	1270.01	1683.59	3961.73	5162.74	4080.38	4276.89	11619.6	3835.3	10955.3	3990.88	4555.23	4716.38	5105	4085.18	3399.25	4198.73	3495.69	4928.71
43	PC(12:0/22:5)	285.298	752.516	2576.87	2490.53	2828.1	2617.04	2270.81	2536.97	1743.31	3050.53	3081.35	1618.88	3546.11	1606.53	2480.28	2435.83	2823.72	1081.84	1371.54	2608.08	2979.56	2413.61	3655.59	4271.97	1750.67	4256.63	2103.73	1816.93	2876.9	1793.67	2831.09	2666.73	2636	2661.06	2685.58
44	PI(15:1/24:4)	380.186	916.591	1822.07	1815.8	2188.06	2258.39	1598.39	1496.73	1023.53	2689.78	3270.2	959.837	2005.46	1418.71	2571.24	2246.13	3674.68	1166.73	1326.4	3132.56	2222.61	2065.82	3422.47	5895.88	1639.96	3024.96	2599.05	2043.87	3483.27	2167.09	2128.05	2570.45	1940.21	2723.22	2822.93
45	PI(17:1/22:2)	391.243	920.615	3576.73	2516.56	2439.35	4684.36	2832.28	2259.09	1435.63	4223.68	4344.86	2417.47	3297.46	1834.55	3835.92	3684.84	3360.22	1312.48	1340.65	4056.1	3585.67	2704.46	4708.65	7281.04	3309.53	7843.1	3112.51	2965.58	4721.67	3195.01	5160.32	3671.98	4548.29	3819.9	3780.99
46	PI(15:0/20:0)	362.65	870.589	2150.93	1583.59	1452.99	2137.06	1104.86	1708.05	805.627	2374.6	4455.76	1699.93	2498.59	2277.28	2489.31	2185.24	4742.13	860.139	1631.13	3615.89	932.763	2837.69	5840.45	7096.89	3235.76	5453.98	3495.64	3099.59	4662.31	3961.47	3059.88	3500.81	2739.57	2964.44	2590.45
47	PI(17:0/22:6)	348.283	914.575	3327.38	3129.56	2621.47	3228.23	2753.64	2646.57	2569.68	4283.86	4450.66	1923.88	3424.16	2283.14	4027.49	2997.73	5146.32	1399.27	1879.51	3532.08	3580.78	2818.13	3837.33	8501.01	3494.21	6678.41	3336.84	3302.23	4658.3	3001.31	4070.68	3712.41	4145.49	3690.32	4033.15
48	PC(12:0/22:6)	293.607	750.5	955.023	894.162	866.782	803.037	815.584	737.752	604.748	931.774	1206.06	566.869	959.382	562.838	1116.28	930.056	774.368	165.79	209.4	753.034	672.079	567.272	788.329	1654.46	713.766	1595.44	800.624	813.394	1053.66	341.506	892.394	913.637	774.243	984.406	1071.41
49	PC(15:1/17:2)	293.289	728.516	4473.1	4313.88	4854.52	3886.57	3686.38	4518.33	2785.71	3674.49	3960.67	1655.04	2740.41	1633.37	2507.29	2756.29	2788.44	1070.72	1430.08	3736.04	3780.61	2019.64	2998.66	5986.08	2545.75	5778.5	3008.52	2727.8	3996.41	2478.56	3769.68	3662.28	3911.83	3748.6	3948.05
50	PC(17:1/24:4)	515.811	850.627	4954.56	5288.07	5175.75	4812.67	4789.75	4695.78	3091.03	5408.86	5415.81	2864.95	3603.5	2799.77	4311.9	4083.12	7507.11	3253.3	2724.33	5555.18	7951.22	5099.32	6922.4	9858.5	4653.28	8408.01	5269.15	4132.72	7092.01	5073.76	5966.71	5848.96	5061.72	5096.5	5944.43
51	CE(16:0)	721.551	642.612	735.637	789.523	683.736	525.249	597.805	578.317	460.712	2206.94	2255.59	1315.61	1559.64	1142.1	1598.41	1918.72	1463.14	712.621	871.117	1338.22	1438.01	1300.69	1948.47	3000.35	976.418	2130.32	1170.93	1287.99	1759.03	1141.83	1478.92	1343.86	1166.3	1282.26	1134.35
52	CE(18:3)	677.206	664.597	447.834	411.415	312.11	442.39	409.008	401.794	288.307	873.172	754.682	404.515	495.005	481.242	591.586	711.235	599.569	397.125	305.941	621.169	692.965	386.024	1430.47	1532.49	497.053	1088.9	627.88	625.064	1022.31	599.337	743.964	566.703	691.716	1093.85	673.907
53	CE(18:2)	697.677	666.612	1225.93	1020.29	881.839	999.118	943.278	778.526	493.257	1735.62	1572.33	868.781	1212.1	1025.73	1179.82	1131.31	1313.98	525.816	706.556	1387.62	1187.81	964.566	2028.73	4153.2	1854.82	3144.65	1524.11	1637.81	2373.02	1743.39	1544.98	1561.79	1424.05	1486.1	1319.58
54	CE(18:1)	721.504	668.627	5417.76	4883.65	4915.43	4957.58	4457.68	4381.49	2905.51	6711.98	8474.05	3973.61	4999.8	4151.29	5542.46	5239.05	5181.06	2483.12	2637.57	4462.98	5932.08	4350.26	8624.25	10375.7	4142.37	8261.17	4775.59	3605.39	6038.3	4250.61	5922.66	4660.26	6075.64	5433.52	4687.78
55	CE(18:0)	753.154	670.642	254.578	233.346	277.549	261.298	223.898	245.849	173.297	458.403	423.436	263.458	369.871	242.326	414.702	299.347	416.811	139.508	193.295	381.712	569.077	427.362	649.326	876.627	280.8	778.722	298.173	322.798	512.808	360.413	361.154	273.313	285.492	309.43	309.464
56	CE(20:2)	723.395	694.644	558.517	664.503	557.798	415.133	478.373	418.172	311.763	922.368	1018.01	473.3	817.485	580.534	864.072	702.228	746.765	380.269	425.784	499.155	799.315	664.045	2105.03	1208.77	487.217	942.687	560.326	515.803	743.936	1395.31	741.361	698.331	715.82	482.794	620.958
57	CE(20:1)	751.426	696.659	923.515	867.002	692.054	718.421	765.691	563.084	413.248	1184.67	1034.38	493.823	793.632	550.766	750.836	659.814	869.774	404.652	457.833	877.249	948.641	689.542	1399.36	1353.6	642.001	1226.72	697.248	611.432	752.132	603.727	817.46	691.75	722.963	861.446	737.297
58	CE(22:6)	674.254	714.613	14689.1	11605.7	11589.4	11158.9	9500.5	7948.98	6689.79	23543.1	20478.4	11789.5	16174.5	10519.8	16207.1	15350.3	18841.2	7805.41	10229.9	16582.5	16944.2	14072.6	23049.7	39365.5	14376.8	30264.4	15838.4	13921.4	24111.8	17487.8	16245.1	17764.5	17792.4	18546.1	18130.4
59	CE(22:5)	673.65	716.619	1996.27	1679.59	1587.09	1637.11	1307.07	1341.64	969.841	4038.6	3228.02	1834.02	2875.83	1829.66	2499.66	2452.38	2726.04	1168.96	1505.22	2494.85	2691.94	2333.33	3461.16	6354.28	2221.59	4729.21	2593.32	2303.82	3718.65	2555.84	2515.73	2755.13	2719.53	2846.15	2668.43
60	CE(22:4)	686.143	718.634	834.111	748.74	871.494	762.571	757.128	740.738	364.183	1467.08	1213.7	769.17	989.325	678.572	1032.77	1536.65	996.556	548.792	647.323	1121.73	1152.83	1083.45	1903.81	1947.07	776.833	1913.13	901.641	822.267	1255.49	1028.96	1013.67	938.945	1024.7	1099.62	1034.14
61	CE(22:2)	752.999	722.676	422.593	415.457	362.872	918.962	306.228	399.282	266.434	319.783	353.428	187.268	216.886	200.648	277.939	238.752	377.069	169.607	141.255	369.523	470.486	334.377	529.751	814.608	257.345	481.03	280.875	195.715	388.495	231.46	297.24	395.072	256.741	319.511	394.423
62	SM(d15:1/24:4)	333.022	765.576	654.199	842.864	783.197	612.201	731.872	713.538	513.738	1767.67	1619.11	734.589	1400.17	636.444	1341.66	1376.34	1479.34	485.611	815.831	1084.16	1175.56	1157.31	1404.14	5322.34	3189.03	5456.89	3553.65	2923.95	3603.07	2851.66	2039.07	1825.61	1657.3	2212.16	2283.03
63	PC(2:0/28:0)	367.815	706.536	8.27846e+06	8.16098e+06	8.92769e+06	8.7436e+06	7.53158e+06	8.07024e+06	5.07121e+06	9.94919e+06	1.06512e+07	5.2525e+06	7.2994e+06	5.17062e+06	6.97134e+06	6.87604e+06	1.27402e+07	5.43135e+06	5.66517e+06	1.20871e+07	1.36395e+07	1.05472e+07	1.61239e+07	2.37789e+07	9.56438e+06	2.11398e+07	1.04937e+07	9.11655e+06	1.35842e+07	1.05172e+07	1.0332e+07	1.01102e+07	1.0038e+07	9.81343e+06	1.04305e+07
64	PC(7:0/26:1)	418.576	746.588	105570	105636	99740.6	114107	85801.5	84284.4	57255.6	85149.8	124278	52510.4	72994.5	53425.7	79719	66864.8	83418.4	40239.6	41805.6	80949.6	110191	74974.9	88234.1	149259	68367.1	113014	68226.3	56169.6	94732.7	55313.8	84841.4	83114.4	83013.1	81214.1	89306.2
65	SM(d14:2/21:0)	341.26	715.569	10472.1	8553.94	7095.56	7729.4	7845.86	6638.8	5158.27	17867.4	19077	6675.6	13439.4	8649.2	10956.2	13424.6	10071.9	3624.01	5390.51	9750.3	7877.62	7933.62	9395.34	28052.8	12746.4	19474.5	12229.6	12979	18807.1	12410.7	14569.2	14156.7	14123.2	13101.4	14365.6
66	SM(d14:2/27:0)	485.45	821.645	49115.2	35340.5	37739.4	31281.2	37555.5	26683.7	21334.7	38712.9	46906.9	18134.3	28841.7	19656.8	18236	26728.4	20427	7691	8901.6	17108.8	15093.6	14159.6	24547.8	43752.8	15897.4	27055.6	16766.2	15872	25733.4	17187.9	28821.5	27183.5	28824.5	35173.2	28498.3
67	SM(d14:0/20:1)	360.09	725.553	552732	617883	707512	713260	564805	664036	395743	770976	850057	430562	526852	427175	554730	510740	733957	295280	296856	639898	532382	557693	796761	1.15455e+06	476788	972475	489842	450905	691685	516472	630576	623871	634274	612475	601673
68	PC(8:0/22:2)	300.202	702.501	3186.95	2168.53	2839.05	2198.01	2529.79	1804.4	1920.35	1862.05	2048.64	911.244	1381.56	929.61	1386.24	1411.27	1905.39	654.254	914.565	1401.71	1581.46	1239.56	1998.55	4332.67	2136.06	3418.34	2078.78	1339.94	2433.17	3719.18	2342.13	2362.73	2404.24	1731.81	4621.98
69	PC(15:0/24:4)	491.866	824.61	7718.2	5042.02	6566.09	5085.58	5452.03	4361.16	4039.25	7734.59	7185.92	3446.44	5851.06	3567.72	5012.18	5063.28	7828.35	3068.8	3697.66	6504.66	6470.65	6262.85	8591.52	17309.4	5773.26	13404.6	6225.04	6228.85	8660.6	6409.6	7534.04	7134.75	7709.88	7192.77	7144.62
70	PC(15:0/20:3)	401.599	770.552	11924.1	20522.2	18715.8	35846.5	25657.4	19191.7	12935.9	57165.6	54718.1	25956.8	32981.7	14396.5	17022.5	34758.6	30563.9	17763.4	12138.7	31672.5	30901.1	36764.2	44215.7	51823	19310.8	41501.8	35415.6	16558.8	46585.8	27634.6	39930.2	37358.3	18884.9	29575.5	39552
71	SM(d16:1/27:0)	565.762	829.709	4223.94	4031.16	4163.48	4483.93	4549.1	3875.22	2734.72	4529.22	5532.3	2135.9	3548	2264.62	2392.95	3647.83	3808.54	1548.3	1432.66	3323.73	3637.26	748.177	4714.2	7528.75	3219.92	6042.11	3193.46	3604.7	4703.04	3345.78	5097.77	4521.38	4159.62	4467.84	4541.86
72	PC(18:2/22:6)	348.152	830.554	8748.31	9650.02	8810.55	9207.28	7483.08	7838.88	5303.87	11295.7	10341.2	5556.35	7199.43	5622.83	7742.87	7422.9	14441.3	5119.35	6647.63	10640.7	9830.46	9085.18	13263.4	15584.5	6757.95	13246.4	8395.94	6797.44	9651.47	7184.51	10713.2	10816.2	10733.4	9783.18	9944.02
73	PC(20:5/23:0)	550.308	878.654	1222.27	985.201	1454.49	1038.12	1113.93	747.398	664.407	1978.7	2359.72	1136.08	1564.19	407.105	1598.3	1606.3	547.353	1053.44	1045.35	1895.2	2689.37	1918.8	2162.87	2101.45	1180.15	3204.25	1280.09	1703.44	1311.11	824.788	1818.56	1624.47	1559.87	1561.09	1908.68
74	SM(d14:1/20:1)	334.443	701.553	35354.8	32113	17972.3	21910.7	29673.2	22969.8	8978.09	36595.5	38504.9	14776.5	26908.3	15812.3	25715.2	24678.7	21089.6	8812.98	11319.7	21075.4	15982.4	13845.2	19448.7	56684.2	21642	49760	24196	22672	37939.7	22544.5	34567.1	30662.2	34138.2	36495.6	36224.4
75	SM(d14:1/27:0)	528.294	801.679	55807	41630.3	43302.4	38730.4	47899.2	35941	27167.3	46667.5	63031.7	21512.6	35690.2	23648.4	24506.9	35428.5	34359.7	15604.1	14316.2	27854.6	27349.4	26548.8	39326.7	83304.6	33372.4	53755.8	29642.1	33824.9	49717.1	35146.1	49674.8	47131.9	47669.4	48918.7	47596.2
76	SM(d15:1/27:0)	561.658	837.689	9307.08	6428.11	11909.4	7756.8	10490.8	6744.09	4238.89	9127.97	12440.5	5567.97	8090.32	5893.7	8260.03	8545.03	11143.4	5188.43	5651.9	10957.7	12966.9	8776.78	16856.4	29107.3	12213.3	29368	15832.5	15534.1	22845.8	17115.9	13930.5	15174.2	14851.3	15160.7	14567.4
77	SM(d14:0/26:0)	550.129	789.671	2354.43	2000.05	2852.95	1956.83	2734.36	2205.47	1453.5	2966.53	4205.71	1825.64	2750.62	1622.94	2241.86	2832.66	2829.72	1407.8	1521.57	2575.33	2935.8	3087.81	3752.34	6814.42	2501.02	5806.76	3120.69	3098.61	4625.27	3411.49	3070.97	4218.8	4659.23	3422.73	3946.39
78	SM(d15:0/23:0)	463.29	761.637	5142.22	2325.13	3024.54	2271.75	3741.23	2576.33	2173.06	18829.6	11029.5	4412.18	5834.56	3694.61	4153.38	5632.12	4377.81	8453.3	2745.73	20396.6	24741.1	2860.15	4277.08	33655.8	3939.75	29599.4	16155.5	4230.91	5155.21	4641.99	6815.27	6577.96	6370.58	5503.06	3202.48
79	PC(12:0/18:0)	339.701	706.528	8018.21	7549.1	7576.2	7832.75	6215.46	6785.57	4793.16	9584.94	4094.69	4291.62	8401.37	5018.74	7846.98	8351.44	8490.82	3327.34	4491.11	10952.7	6638.36	5227.98	8736.21	22163.8	9081.82	20883.1	10730.7	9187.61	13000.8	9422.15	12238.2	11801.3	12183.7	11767.1	11203.6
80	PC(15:1/24:4)	449.973	822.594	14819	21293.7	18712.1	30777.1	27393.1	33364.5	17205.1	25333.7	27421.2	14422.8	17547.3	13711.5	18575.5	17533.8	25977.1	10914.9	12256.9	8485.5	27700.4	20073.7	35465.1	28462.8	9544.6	30334.7	11172.9	16375.9	14633.4	8651.43	25663.1	24881.7	27313.5	16599.6	25820.9
81	PC(17:1/22:2)	518.659	826.626	4818.06	4769.61	4753.41	4722.3	5218.8	5058.97	4690.73	4124.98	3186.7	1940.22	3924.35	1741.79	2665.75	4040.35	4993.13	1830.68	2316.96	3572.52	4874.83	3517.53	5504.65	7258.69	4120.07	7571.66	4115.92	3336.84	5000.01	3484.83	5809.74	4348.18	4738.19	5749.74	4458.65
82	PC(15:1/26:2)	549.664	854.678	6942.14	5646.82	6068.88	5287.92	5930.67	5129.57	4125.62	5612.7	4164.09	2238.81	3422.38	2103.2	3051.93	3458.09	4564.64	2155.02	1975.94	3677.15	3922.05	3788.28	4875.01	7551.48	2828.08	6886	2739.26	2920.65	3811.48	3524.25	5130.07	4817.18	4473.21	4196.31	4318.4
83	SM(d14:0/18:0)	325.075	677.554	15684.5	13429.5	11310.1	11702.8	14652.2	20776	8926.96	12761	15152.3	5720.52	9825.49	6078.95	7754.85	9094.04	8650.66	3479.57	4613.21	8423.58	7330.54	6750.13	9229.48	23882.2	9782.36	20115.1	12314.3	9995.78	14525	10346.6	13642.2	13752.1	14231.7	13931.4	14355.5
84	PC(17:0/22:5)	479.061	822.596	6769.73	9831.67	9143.39	7875.17	8408.05	7860.35	3330.72	7291.93	8954.91	4352.54	5687.59	3129.67	5913.15	4598.89	9603.18	3542.18	4337.95	7291.82	9121.13	6055.13	10900.3	15868.8	6584.07	13267.8	7446.34	6544.88	10362.6	6566.09	6222.87	9027.91	7852.19	7797.15	7522.49
85	SM(d15:0/17:0)	301.346	677.544	9975.07	8608.71	7494.85	7285.79	7495.6	6592.52	4941.88	6265.35	6439.4	2487.97	4559.66	2949.44	3931.05	4494.11	4286.5	1504.36	1710.85	3932.25	3016.04	3254.11	4074.75	11219.7	4711.15	8869.62	4262.92	4130.68	6588.33	4455.06	6853.74	6471.88	6623.82	6438.26	6274.38
86	PC(18:1/18:2)	392.153	806.562	173936	197277	237608	250551	174469	248071	135087	182531	189315	101424	123703	99655.4	143832	117963	239062	95433.4	103100	219521	251084	179515	322026	311824	129079	315859	152047	121725	193780	136385	177961	177672	169845	167112	159293
87	PE(16:0/14:0)	376.426	664.486	19637.9	16091.3	19238.3	23792.8	16718.7	17612.8	12165.5	12349.2	10560.5	6103.22	7644.8	5509.09	7025.91	8479.88	15947.2	6404.05	8575.93	12678.4	17582.1	14827.2	22097.6	30888.1	12519.6	31167.7	14928.7	15287.3	19209	15851.7	18659.8	15158.8	17009.5	17847.7	17410.4
88	PC(2:0/34:0)	511.599	790.627	14605.1	10712.2	12115.2	10734.5	12779.8	9593.64	7355.69	34627.2	49056.9	20852.5	32158.7	20829.9	32039.1	33996.9	72665.5	31284	37717.7	65262.8	77507.3	62927.2	84466.5	101205	41429.5	91406	52873.6	53537.4	60270.6	49203.5	48293.8	45346.4	46927	50270.1	49341.8
89	SM(d14:1/24:1)	421.889	757.615	27507.1	17454.4	58282.5	15794.5	16766.7	20736.7	10222.7	31383	37217.1	18264.4	28559.1	19216.7	21772.1	22501.3	21795.3	8526.89	8121.56	18736.9	15537.4	17511.9	30142.9	44076.1	20741.5	39940.7	21318.8	16785.5	23186.8	19617.5	24277.3	23337.7	18217.8	23386.2	21874
90	SM(d14:1/19:0)	332.215	689.556	163985	121721	105467	108501	118629	82327	71725.8	259218	317216	112614	214834	128709	181653	214244	167245	62731.2	85065	167536	104718	117152	130661	466707	184821	354715	223791	240523	309562	203770	260485	274844	277238	279877	271781
91	PC(17:0/22:6)	389.346	820.579	10256.8	9092.91	10276.1	35592.2	32717.5	6939.09	5195.17	12687.3	12870.9	6431.39	9360.1	10395.6	11481.5	13874.6	15016.7	8755.9	10616.9	12570.6	13094.7	12458.9	17168.2	20723.1	34215.5	16482.6	17247.5	7181.58	38150.2	8683.18	14319.4	10819.2	11681.1	10670.5	23243.8
92	PA(16:0/16:0)	390.454	666.501	5288.06	3350.09	6177.37	5466.5	8608.12	3184.89	5406.31	34205.6	27679.8	9151.21	45225.7	23524.6	36540.7	55638.5	33431.4	12544.2	18760	16949.5	10676.8	22022.4	33445.4	139022	43648	123482	93027.4	92073.8	76641	71451.7	58478.1	53726.4	47221.9	23521.1	21298.1
93	SM(d18:2/24:4)	475.662	805.628	5341.52	3921.85	4617.05	5479.04	3911.92	3549.57	2943.51	20772.7	29045.1	13420.8	17862.4	12317.2	16876.8	17723.8	21960.6	9628.8	10381	19238.9	26194.2	19416.5	29500	27181.2	10349.5	23924.3	11526.6	11927.6	15541.4	11731.7	14145	13786.4	13691.2	14444.8	14343.7
94	PC(2:0/27:0)	384.286	692.508	38303.3	37623.9	37408	38886.1	38451.2	39002.7	26683.7	100605	112180	50712.2	78428.7	51428.3	71353	69287.3	70125.8	31306.2	36126.6	61314.4	77846.2	57517.9	90685.5	157928	69019.2	150910	84583.5	61972.3	103528	69931.5	71753.1	70400.7	71074.3	69934.2	70677.9
95	PC(2:0/26:0)	332.408	678.502	11233.3	10363.9	7404.69	7256.51	9940.64	7773.28	5305.8	10445.3	15212.9	4266.46	8027.26	5290.74	6625.14	6997.39	7671.46	3714.77	4434	7452.32	6883.47	5951.92	9614.2	45097.2	14641.6	25713.5	13755.8	9970.25	17030.5	9033.47	12151.3	12569.3	13239.9	12667.8	13814.6
96	SM(d14:0/22:1)	413.993	753.58	28541.9	29313.4	39788.4	44177.4	35529.8	36891.8	21310	31740.3	40146.6	21010.5	23175.8	24076.2	8125.68	20308.5	32846.7	15699.3	13695.2	34979.5	31615.6	29463.5	48216.3	56565.4	24440.6	41606.9	22724.8	20128.1	29920.4	28781.4	28286.5	27397	24671.5	22521.1	23084.5
97	SM(d14:1/21:0)	388.353	739.567	6510.78	5570.82	9485.1	7079.92	6614.9	7847.75	4381.2	11619.7	9287.33	4695.55	5364.73	5271.86	5600.41	4751.03	11217.1	3728.07	3765.32	9383.2	7579.14	7975.21	11249.6	22849.3	9434.86	14159.5	6755.18	8357.59	10314	10157.7	7061.16	8313.58	7541.8	7451.51	6886.95
98	SM(d14:0/22:0)	434.123	733.604	152821	144353	151513	138246	124124	122920	77412.8	156779	181755	76553.7	119633	113880	106422	116289	112162	54245.4	58986.4	112355	121190	82048.4	149611	245630	104335	233208	119086	112735	160592	125214	136304	147029	147702	204473	153366
99	SM(d18:0/26:1)	545.234	865.697	1422.75	1076.08	1229.43	1136	1196.71	1126.34	765.05	1013.98	869.976	389.136	928.498	439.389	441.858	530.376	686.982	317.292	377.025	612.891	749.775	617.131	898.116	1376.1	529.951	1673.1	592.246	533.057	861.271	598.908	836.679	906.782	989.246	575.641	908.232
100	PC(18:4/20:3)	314.9	804.548	35584.6	32739.8	29275.9	31228.9	36837	26238	20316.8	44051.6	61604.1	20459	43771.7	20651.7	33150.3	44120.1	51889.1	19026.1	26706.9	42322.2	49239.7	37799.8	70922.4	55394.8	23307.9	50802.6	27363.4	31928.6	35140.4	23675.6	39725.5	37555.2	38980.7	49915.8	39644.9
101	PC(16:0/16:1)	374.684	754.531	490795	560850	700254	752022	524780	775859	402709	784455	796987	487686	515683	485826	619727	528369	1.16668e+06	474477	476791	1.04606e+06	1.35436e+06	947314	1.86994e+06	1.94352e+06	824555	2.07595e+06	808068	693008	1.17239e+06	906865	714971	687704	638427	623567	615191
102	PG(18:1/16:1)	313.468	764.537	5286.17	4735.45	4244.52	4080.49	3766.04	4129.47	2968.6	9567.9	10125.9	4687.06	7052.81	4407.21	7476.73	8465.13	5937.03	2286.7	2952.51	5587.34	5267.21	7759.31	6934.97	11652.8	8277.87	10934.2	9024.78	5394.89	8077.36	5023.14	7175.72	7130.03	7361.69	8640.46	6167.48
103	PS(18:1/24:1)	485.728	872.632	14881	13741.3	12553.1	13103.2	12429.3	10423.9	8920.46	4900.5	4796.77	2159.77	3649.39	2483.95	4047.88	3365.73	6281.58	2116.97	2677.76	5148.35	4700.62	4457.91	6770.21	11018	4494.35	9469.3	4811.92	4416.56	6400.06	4869.77	9175.93	8528.87	8337.19	8142.23	8357.77
104	PC(3:0/26:0)	340.186	692.518	202295	152896	141031	131779	145623	130772	97672.4	111478	134251	50088.3	88039.3	52067.7	77986.4	81603.5	123162	39919.8	56601.4	109349	97570.5	89002.6	103190	263269	95324.3	179499	112172	106085	129330	89089.1	146752	149423	150079	145949	148222
105	PC(10:0/26:2)	428.942	786.598	1.89696e+07	1.87223e+07	1.87605e+07	1.88186e+07	1.65964e+07	1.63287e+07	1.07341e+07	1.04602e+07	1.18974e+07	5.51582e+06	7.95734e+06	5.52701e+06	9.03846e+06	7.62961e+06	1.22469e+07	5.29134e+06	6.11614e+06	1.12316e+07	1.28221e+07	9.71413e+06	1.56793e+07	1.87682e+07	7.78787e+06	1.79141e+07	9.11145e+06	7.73251e+06	1.2041e+07	8.38955e+06	1.31909e+07	1.28136e+07	1.35942e+07	1.38509e+07	1.33455e+07
106	SM(d14:0/26:1)	506.807	809.646	122834	102808	115584	101961	113067	102196	72602.7	164992	199303	86127.8	115638	82945	84485.1	108854	102843	44968.2	43210.1	84656.7	78940.2	78569.8	111404	206315	91254.5	146981	81568.8	88808.2	127358	93004.6	138929	129023	133876	127707	126808
107	PC(17:0/22:4)	430.484	824.609	17977.8	26927.3	20333.2	19464.8	14002.7	52109.4	10619.7	17830	13595.1	7229.54	20956.6	10210.9	10585.9	16389.3	47651.2	19430.4	8216.71	16780.7	30005.6	27872.8	26274.4	11549.4	9529.65	22724.1	13534.7	10073.2	29071.3	10258.7	23672.5	21406.9	18206.8	20790.3	14872.6
108	PS(16:1/18:1)	305.421	760.506	28031.2	25312.1	20279.1	22395.3	21776.2	20542	14605	29425.3	30315.7	11145	24499.7	13189.8	16921.8	19095.2	11896.3	4522.36	6299.3	13816.2	7989.43	9066.95	13603.6	25434.1	12618.7	30541.1	18964.9	14048.6	17114	13175.7	21373.6	23935.3	21071.5	19256.7	22271
109	PE(P-16:0/22:1)	534.536	758.601	38191.9	34174.2	32223.2	29835.4	34004.6	28669.2	19664.9	40450.9	44870.1	17200.4	27933	18447	26380.2	27368.9	28758.4	12046.6	13610.8	24158.1	30544.2	23580	34470.9	76278.9	31412.3	66815.3	35373.6	31440.1	44509.3	33467	40832.9	39765.5	39297.5	39906.3	37333.6
110	PC(6:0/26:2)	367.497	730.524	35396.4	33135.6	38806.1	33692.2	32227.4	30820.4	19356.5	37008.7	39892.6	63303.1	27616.2	19039.5	29469.4	24856.8	53820.2	58141.8	69122.3	122111	181137	128140	211950	104197	108596	88274.4	126698	43167.9	163746	43063	39001.2	38946.8	39684.6	40755.9	42371
111	SM(d17:2/27:0)	546.881	841.709	20070.2	15657.8	16357.2	15633.1	17783	13907.5	10717.1	13820.4	15399.3	6232.78	9896.01	6649.91	8007.45	9840.74	11178.3	4661.73	5001.05	10533	10112.4	10639.9	16405.4	21363.5	8777.25	17132.8	8927.36	8618.65	12707.9	9218.93	15239.1	14521	15152.6	14969.8	15256.4
112	PC(16:0/18:2)	386.159	780.546	515192	605462	703178	782552	563250	813491	423641	729149	763446	431688	487370	423222	566832	458572	908871	380815	367411	874143	1.18701e+06	755326	1.37856e+06	1.45713e+06	615512	1.53368e+06	633653	522828	899482	672290	569657	619645	607888	579331	565589
113	PE(16:0/16:1)	335.099	712.485	16660.8	2621.29	10778.7	2586.91	2631.49	2890.9	1733.82	5766.6	5363.26	2785.32	4131.79	3166.74	5162.05	4402.25	20301.7	1653.54	2596.34	4737.04	4041.75	3688.58	6120.56	9225.1	19704.6	9848.16	5463.83	4434.11	28717.8	4238.75	4832.77	5289.62	5483.17	5442.3	5596.88
114	SM(d14:0/24:1)	464.097	759.631	48022.1	32747.3	34763	32070.8	39942	28202.8	21681.5	87190.4	103193	40469.9	56939.8	39902.7	41045.9	59763.7	51172.3	21001.9	23025.9	42324.8	39984	41005.2	56728.2	104808	43644.1	64032.6	35651.5	41426.1	64116.7	44687	61343.7	62691.8	60689.4	63642.9	59023.9
115	PC(18:2/22:2)	473.789	838.617	23194.3	25510.8	25885.9	25986.3	22182.3	23303.1	14869	17815.7	20287.5	9277.7	13334.4	10056.9	14263.1	13451.8	22420.5	9470.86	11007.8	19637.9	23100.9	17866.7	26822.1	34272.6	13158.4	30535.3	16041.5	13448.3	21270.7	15600.1	19876	20148.6	20893.9	19125.5	19913.8
116	PC(14:0/22:6)	293.737	778.532	18659.3	16685.5	15997.9	7493.66	6778.49	6948.81	10801.3	13712.1	13639	6173.57	10547.8	6151.77	9807.42	11020.3	19320.2	4293.47	6058.79	9974	10903.1	8597.93	11941.3	11914.5	4922.57	10116.6	5918.41	5570.66	7924.56	5129.99	10087.3	9814.15	9993.79	9730.89	10000.3
117	PC(13:0/24:4)	447.282	796.58	58445.6	101350	87671	79827.4	90085.4	48728.8	64401.5	104506	112475	53453	77282.3	51163	66691.2	76555	62247.5	48979.9	57310.3	59559.8	84970.1	53475.3	77856.2	230974	59774.7	223226	71946.3	94167.1	142452	71071.7	98978.9	56761.1	33714.4	97794	92626.9
118	PC(16:1/22:6)	354.745	804.545	24158.3	47336.9	27497.5	37182.3	26427.3	31050.3	32299.6	34671.8	38680.1	19563.9	26167.4	18783.1	27850.2	23818.8	41155.4	15051	27372.5	51924.8	52444.8	29914.6	66386.9	43334.9	28426.6	62667.4	20119.5	29953.1	26945.5	19571.8	25787.9	25024.2	26208.8	26964.7	26112.2
119	SM(d15:0/27:0)	548.154	817.702	54661.7	39778.1	42170.9	38201.5	46114.2	35395.5	27666.3	39782.6	49249.7	19019.2	28972	20614.8	23372.1	30074.1	30537.7	13674.1	15025.6	27237.6	28733.9	38978.5	38914.2	62850.2	30786.7	54237.4	28734.6	28678.7	41485	30667.1	48156.9	44591.5	45732.6	43998.6	45187.1
120	PE(14:0/16:1)	330.613	662.471	5498.28	5056.47	4374.61	4612.47	5044.72	4612.59	3357.06	6152.03	8254.86	2749.29	4935.51	3315.67	4199.54	5492.04	5114.26	1737.92	2036.64	3109.97	3412.75	3555.17	4382.14	15387.4	4954.35	15232	7696.49	6636.1	8619.14	5305.22	6979.1	7362.06	7420.7	6950.91	7525.18
121	PC(18:4/18:4)	286.683	774.499	409.832	309.698	308.367	313.182	272.567	320.534	219.085	495.111	688.347	320.247	461.245	340.902	450.554	449.172	368.212	174.545	211.26	382.037	452.189	296.067	482.985	825.737	352.656	1093.48	434.18	445.101	545.956	390.869	389.338	461.708	452.341	496.223	567.869
122	PC(11:0/22:6)	336.316	736.506	10790.1	8955.84	8584	8886.49	8137.38	1151.98	909.413	4310.83	5788.63	3255.02	4225.24	2487.91	3843.1	3715.47	18215.1	2362.97	3814.65	5262.55	5463.27	4925.31	6602.09	11965.9	3676.02	9443.04	5385.56	4659.68	5756.47	4028.84	9787.53	3607.09	8612.71	3832.91	13322.3
123	PC(3:0/25:0)	311.398	678.504	318497	283266	266405	255883	257080	235125	168441	105075	114555	44843.6	87738.3	56876.3	78444.5	81337.7	93762.5	37927.4	51890.7	92849.9	80008.9	73048.9	101575	309537	111732	294424	151072	112254	160258	122006	198057	192841	194513	200323	197318
124	PC(4:0/26:1)	339.815	704.517	94108.4	73970.2	67875.1	61172.8	67248.7	54278.8	44450.1	76073	99154.4	38251.4	60514.8	40858.5	55415.5	61774.4	57130.4	24898.8	32885.7	65128.7	55878.7	47232.6	55303.7	184802	70282.1	160133	94538.3	70930	109171	75207.9	90302.4	96657.3	93243.2	96314.6	101362
125	SM(d18:1/24:4)	491.636	807.643	4824.35	4258.36	4592.58	4355.42	4054.23	3538.01	2314.68	6859.82	8424.28	4298.31	5116.08	3664.52	5001.5	5101.87	6818.25	2457.08	2191.81	4070.84	8004.52	5302.63	9636.63	13982.6	5095.3	10229.1	5435	5851.07	7907.23	6365.34	6115.22	5400.96	6686.27	5565.57	6297.74
126	PC(11:0/26:1)	491.866	802.627	50426.3	24624.1	42777.8	40864.1	24326.7	33949.4	16579.9	38072.5	52102.4	22871.5	29456.6	20107.9	34466.7	27948.5	47626.1	18570.2	26460.9	41636.9	49927.5	35454.9	53925.4	80805.1	30783.4	65669.6	39611.5	31853.9	44194.5	33071.2	56408.2	48721.6	39188.5	37693.3	49852.3
127	SM(d17:2/24:4)	428.561	791.609	7385.03	8559.61	19136	17052.1	5025.4	8862.47	8454.45	16174	19543.5	9371.73	12937.2	9995.16	14013.6	11165	17126.9	6763.13	7974.38	18613.7	16513.3	12289.5	24833.3	35864.7	12507.1	30039.3	13786.4	14147.8	22357.7	17464.5	8609.07	17620.7	12871.5	7540.52	16197.2
128	PC(13:0/26:2)	494.566	828.642	21357.8	19136.9	18911.4	18021	16627.9	15134.8	11270.3	12113.2	13046.2	5905.79	10202.3	6209.98	9799.1	9645.19	14345.5	6120.57	7030.27	13243.8	14675.4	11590	18422.9	26717.4	10079.9	23723	11947.9	10998.9	16470.3	11729.9	15094.9	15348.5	15726.5	15826.7	15929
129	PC(20:4/20:4)	332.722	830.561	19088.5	14925.5	26087.3	8927.82	15166.4	27972.7	6315.36	57363.7	63905.1	28855.8	44537.6	28315.6	51493.7	51250	83125.1	27985.2	43021.4	70858.4	61755.9	57677	82018.1	104105	47773.8	122429	67028.4	74818.7	74699.1	50168.2	58537.9	57310	59957.9	56814.3	59341
130	PC(2:0/22:0)	194.167	622.439	144.137	157.927	190.139	207.301	140.004	251.652	128.585	1230.58	1376.76	563.463	873.819	646.381	832.815	943.895	927.322	432.167	519.021	1146.14	812.255	792.005	1181.11	7207.62	1405.1	7560.28	3602.89	1046.87	1953.29	2106.82	1424.75	1332.86	1295.13	1339.81	1237.18
131	PC(16:1/24:4)	498.198	836.605	11070.2	9774.13	13543.1	12343.9	13154.7	10960.2	9033.23	10959.7	13041.5	5388.67	8613.62	5772.89	7883.19	8039.01	10212.3	4626.34	5486.86	9152.1	11368.8	8363.18	12242.2	17194.6	7048.86	16071.9	8450.09	7528.02	12506.4	7051.41	10285.9	10573.8	12123.7	11684.6	11807.2
132	SM(d14:1/26:1)	463.844	807.629	49790.5	60640.6	38073.5	36470.2	41085.7	33023.4	24215.3	57351.7	69788.5	48751.9	39088.5	31262.1	58868.1	38711.5	37247.3	14430.5	17426.9	31306.5	31292.9	28894.3	44322.2	137473	62431.1	47640.5	27913.3	25975.5	39268.6	30310.9	41906.6	41559.5	38173.3	41648.4	38217
133	PC(18:2/16:1)	308.292	778.532	9876.76	8612.95	8010.91	8679.04	7481.23	7358.13	5441.54	6364.85	6901.84	3284.83	5026.48	3404.19	4727	4951.06	6369.17	2741.78	3427.25	6133.8	6535.16	5354.24	7723.97	9884.32	4071.72	8567.02	4725.67	4221.1	5964.29	4304.84	7530.89	7132.13	7339.67	7093.29	7670.5
134	PE(P-18:0/18:1)	496.906	730.571	234231	212196	211992	204825	214536	193376	139293	288176	300163	133658	212565	132387	184331	194593	203602	82262.1	96018.7	170757	206639	166859	242693	605558	245989	534352	285912	239666	360944	271446	279704	274632	276520	271379	270116
135	PC(14:1/28:0)	621.548	872.732	939.012	934.903	1110.56	1080.09	704.685	805.571	445.887	3442.92	3537.31	1990.58	5417.95	2006.48	1985.95	2591.71	2517.35	877.711	927.062	1922.58	1892.51	1539.25	2377.95	5379.11	2250.91	22078.3	3323.66	2093.52	3889.28	3321.69	2449.89	2119.2	2428.17	2481.24	2426.92
136	PC(15:1/22:2)	414.754	798.595	57554.4	126401	52238.5	133967	48336	104694	32912.4	39014	41147.8	19104.2	28521.7	20976.8	31944.3	26397	43092.3	16260.7	16669.6	35354.4	40745.7	36438	51019.4	62243.1	32910.2	57812.3	28630.8	30200.8	54292.4	37166.3	43147.4	41777.5	40781.1	40647.1	41289.5
137	SM(d14:1/20:0)	400.235	725.566	38.2328	48.6173	764.498	828.373	378.466	17.4724	225.777	8229.94	10031.7	6016.33	6005.22	3553.47	5572.5	5575.9	10545.7	5097.41	5599.76	7744.88	15641.8	9629.64	16122.5	35168.2	15258.6	26851	14630.9	14401.2	19511.4	16295.8	6179.69	6715.57	6892.25	6296.07	7930.69
138	PC(17:0/20:3)	487.031	798.596	9256.36	8997.17	6717.67	5119.64	6273.29	6742.19	4381.72	8523.67	5631.89	5032.1	7923.91	4206.85	6196.75	5211.95	8563.78	4245.09	4283.95	6865.96	10784.2	7541.82	12028.1	13725.8	7670.65	14518.3	7217.04	7179.84	10041.2	6509.26	8353.74	6985.94	6512.14	8040.4	6337.08
139	PC(P-18:0/18:1)	495.382	794.599	96568.9	83869.5	83523.5	72506.9	67491.7	50772.3	42662.9	41679.9	45207.7	18359.3	31967.9	20049.1	28386.9	29442.5	31091.4	12567.1	14472.3	26536.7	29651	21043.5	35780.2	54385.5	22058	49504.4	28101.9	23532.1	33287.6	24940.9	47903.7	46686.6	49928	50454.6	49037.5
140	PC(5:0/26:1)	348.4	718.535	480084	413405	366887	364217	382823	330372	254247	368102	397930	152371	276513	164293	245944	260338	238842	89336	117453	216043	194742	175798	240609	475220	198907	400027	227079	207364	308689	195292	373117	364369	367944	362084	355236
141	PS(16:0/16:1)	298.517	734.492	21304.5	19079.6	15916.8	16522.8	19918.1	17994.6	13654.7	61307.9	65150.2	20826.9	44009.8	26569.4	36469.6	41470.3	18940.2	6252.23	8767.23	16172.8	10469.2	12829.2	17278.7	52265.7	25401	51862.6	28140.2	23480.4	34895.4	21011.9	37032	33196.6	33919	31495.6	31883.9
142	PE(18:1/16:1)	390.358	738.499	33882.6	33455	34319	35911.3	32882.2	37848.9	22769.2	55718.3	55719.3	27913.3	38264.9	27304.6	37883.5	35118.6	47856.7	19496.5	23498.7	45184.8	54200	37121.6	61688	82697.6	34254.5	84670.5	156330	33300.7	56852	33897.4	41769.1	43599	43734.3	40253.4	39256.5
143	PC(2:0/36:0)	550.843	818.658	1310.87	6069.3	6749.36	5971.41	7631.91	432.342	3422.74	2920.82	8821.04	1379.55	5593.45	1616.78	4627.37	2371.37	5042.19	2518.38	2795.02	4526.68	5399.15	4469.61	8865.71	8690.21	3795.98	7209.71	6319.71	5027.93	4927.4	3911.94	3605.01	3875.58	8291.5	3395.49	3241.96
144	PC(18:0/22:6)	414.207	834.595	89510.1	83350.4	91548.7	83467.3	74919.3	78695.4	52076.1	193161	197526	98965.4	146362	98312.8	150832	141476	280384	107892	132332	223083	248436	204226	303626	345526	126045	276933	144910	128093	209472	148551	165921	156750	157922	160557	154932
145	PC(14:0/22:5)	329.703	780.549	53320.3	42599.4	42085.8	38708.1	40219.8	36182.2	29570.9	124818	148508	67034.9	110926	58521.1	108182	118870	133414	49118.1	73860.7	123245	117290	94977.5	125423	145109	60177.8	128168	93167.2	81216.8	101107	64400.5	102182	108849	112647	112096	116479
146	SM(d14:2/24:4)	299.988	749.574	366.678	328.266	378.423	310.941	311.963	393.579	200.146	268.148	313.522	125.362	115.466	93.0582	191.623	80.842	271.128	87.1139	82.7378	426.248	307.832	175.009	255.078	18226.3	7844.88	16729.8	8112.36	7288.79	11581.7	7692.48	3338.02	3111.36	3279.85	3302.4	3090.17
147	PC(18:2/14:0)	358.007	752.514	11593.7	11362.9	12838.6	14297.4	11382	11261	7124.44	13121	13014.1	7255.17	8803.93	6751.02	9458.58	8153.33	15391.7	6335.44	6890.14	13378.9	13910.4	13085.2	16879.5	43313.4	8588.29	22000.6	10763.4	19256	15357.6	9316.7	25019.9	11484.9	11263.5	10746.9	11440.2
148	SM(d14:1/22:1)	369.594	751.564	12991	12224.2	18349.7	12557.4	12218.4	12282.4	7664.28	18827	33676.9	9818.95	15399.8	13429.9	14045.1	17153.2	14525.9	5165.22	6176	15663.8	13192.4	11918.2	20311.6	33507.5	12244.2	23802.6	12106.5	37983.7	19554.4	14348.7	14224	16822.8	13200.9	13073.1	15742.5
149	PC(20:1/18:1)	473.114	836.608	150703	161678	167782	170213	146029	162440	97490.7	89847.4	97289	47005.6	70752.2	47525.6	73827.4	65827.9	106813	43875.8	52445.4	98768.6	109412	82091	137853	163648	69674.8	160728	78498	66715.9	107263	73686.1	108170	106056	107760	102052	104371
150	PC(P-16:0/16:1)	401.779	738.535	75047.3	81928.6	94582.5	98002.7	72912.5	96478.2	51862	92917.3	102975	52460.4	64035.1	50354	72263.8	60742.7	90650.4	36404.4	40600.8	80556.1	89230.1	69130.3	122453	148526	61539	152845	71343.5	55510.4	94978	66722.2	79154.2	79446.9	79316.2	75973.6	77530.2
151	LacCer(d18:2/24:1)	458.062	970.713	5501.57	4612.3	4614.39	5142.46	3891.1	3639.51	2489.27	5564.57	6716.74	3231.54	3818	3064.96	2679.45	4233.62	6488.82	2495.29	2548.34	5210.33	7534.28	5103.35	6903.38	9182.27	3896.31	7468.51	4092.02	3765.98	5189.4	6517.1	5256.62	5504.4	5115.56	5024.29	5069.92
152	GlcCer(d18:1/23:0)	531.99	798.676	1047.69	901.117	1026.95	1049.87	911.336	810.496	518.707	2433.38	3360.53	1302.53	2102.92	1271.74	1954.39	2054.94	3032.4	1289.01	1468.04	2566.75	3457.8	2577.3	3874.08	3374.73	1371.47	3480.09	1768.3	1650.21	2433.47	1632.72	2313.89	2180.97	2323.99	2044.48	2228.11
153	PC(18:0/18:1)	471.274	810.594	341290	373761	418201	435606	325202	401093	246419	679914	711997	376100	504343	388478	584723	496981	917499	376163	431973	859864	997364	744392	1.22626e+06	1.51178e+06	608393	1.3761e+06	630819	561892	911814	622368	592753	591915	558419	533865	542862
154	PG(10:0/26:2)	359.817	797.545	3776.06	3409.53	4161.6	3205.79	3190.39	728.084	2426.68	8962.26	10376.6	3284.72	6694.17	4159.17	6114.7	6151.52	7607.61	2973.16	3503.25	7096.8	5059.34	6253.53	8941.56	19347.7	7357.87	18153.1	9313.6	9016	12364.8	8794.36	6570.79	9391.34	7655.25	8282.18	8140.06
155	TG(17:1/18:1/18:1)	706.742	888.794	19805.6	17482	16825.1	15917.4	13011.9	10411.9	7356.03	42907.7	43853.1	19820.4	29012.5	18349.7	22431.1	27254.8	17209.2	8287.5	9530.57	18218	16516.1	16911.8	28052.3	21353.6	10849.8	38856.1	15657.7	10626.2	20698.6	16385.8	22343.3	22496.2	20782.9	22836.6	21724.1
156	PE(16:1/16:1)	338.513	710.468	3592.19	3137.22	2901.51	2490.93	3358.4	2441.74	1904.39	13635.8	15063.3	5464.06	9752.99	5921.62	9030.29	8236.44	8277.44	3157.9	4706.66	8581.49	7176.77	6431.75	6137.61	14606.2	6508.94	12836.2	7849.09	6484.65	8507.53	6398.01	7928.02	8170.98	8219.33	8543.23	8263.72
157	PC(24:4/16:1)	430.622	858.592	5492.73	7688.55	8537.1	8739.88	13736.6	11231.5	11515.3	17326.5	18066.1	9453	11808.8	9424.85	11765.8	10950.6	24269.5	9690.37	11735.3	24216	23169.5	23612.9	38641.6	34280	14090	12580.2	12076.3	13937.6	20537.5	15854.4	13376.3	12108.9	11227.7	11329.2	10195.2
158	PC(2:0/24:0)	251.702	650.47	1148.77	836.837	1309.68	977.705	931.885	1148.5	820.677	3669.9	4136.14	1978.79	3322.32	2856.78	2624.74	3571.27	2699.08	1260.1	1681.11	2996.53	2431.78	2774.6	3352.14	22166.5	4855.05	30169.6	13882	3633.42	6551.36	6583.9	5629.26	5611.22	5418.91	5495.59	5415.16
159	PC(16:1/16:1)	368.693	752.517	11330	12190.7	13814.5	13059.7	10365.4	14059.3	7973.6	13249	11195.6	6615.98	11258.7	7035.17	7234.49	10434.8	15236.6	7607.13	8705.23	14286.6	18456.3	11622.3	57292.3	24605.3	10205.4	24401	10161.3	9870.62	14977.8	9245.07	30810.1	13754.3	13806.9	12393.4	12976.7
160	PC(18:1/20:3)	405.443	832.576	24208.4	26764.5	30592.3	30411.7	26997.2	31371.4	19352.5	37166.3	37045.3	19923.1	25986.6	19527.1	29093.7	25725.1	55368.4	20491.9	23918.5	47998.7	51894.5	39689.5	64748.5	78471.2	33589.6	27529.6	48997.7	33304	47741	34310.9	35755.9	35286.5	35685.6	32430.4	34654.1
161	LPC(O-16:0/0:0)	95.654	482.357	3352.68	3711.46	3410.1	3819.49	3739.73	2623.03	1818.44	15366.1	25896.9	7583.27	12132.5	6458.41	8391.78	10131.2	8713.92	4169.84	4566.26	13985.9	7661.14	8035.5	10264.9	52725.2	11525.8	24033.7	12187.7	10264.5	19430.8	10054.4	11383.6	10546.5	11057.6	11048.6	11099
162	PE(18:1/18:1)	436.81	766.53	100178	107990	113422	118314	104092	119774	72315.3	101589	100072	51068.8	71463.1	50676	66790.4	64668.1	113575	46680.2	52556.7	105348	115825	91992.4	160998	195617	80794.7	191959	93905.7	76147.9	119653	87104.7	107240	102605	99276.7	97833.4	94557.2
163	PE(16:1/22:6)	328.014	762.501	11239.2	10572	8880.16	10071.6	10106.1	8859.85	6647.16	22102.9	20146.4	8053.12	17662.3	10247.1	13175	14589.1	18446.5	6895.23	8566.04	16656.5	15624.2	11850.1	17060.4	22773.3	10374.9	27333.2	16338.4	11888.7	16816.4	12868.6	18408.7	16243.6	17458.8	15553.2	14705.2
164	PE(16:0/18:1)	432.305	740.515	59854.5	66837.6	71042.6	74239.5	61183.6	71919	49213.3	123339	120475	59533.5	83592.1	62304.6	87961.9	80431.5	118363	51450.5	58686.4	112193	124566	104893	161901	255426	104996	235278	110879	96549.8	140797	100705	99301.3	93741.9	93162.3	91481.2	88769.3
165	TG(17:1/17:1/17:1)	687.013	860.764	8715.99	7786.05	8343.44	7789.97	6469.4	5419.98	3683.66	41779.2	44640	19367.6	27740.6	19357.3	22610.5	28862.2	20818.8	9753.38	9871.11	18573.7	19905.5	17093	29492.4	27398.5	13241.4	41768.7	16906.3	13548.3	21890.3	16322.1	19862.2	18729.4	19499.5	21398.5	19657.2
166	PC(P-16:0/16:0)	444.902	740.553	219081	228922	258743	249053	203195	212135	132545	322551	342089	170001	224193	166652	219334	218115	337121	148514	162386	311912	359255	282185	443093	570334	239850	509077	253332	243221	322934	271982	298213	280737	292094	271959	276451
167	PG(16:1/18:0)	324.175	771.506	3503.6	2914.96	3221.21	2718.22	2784.59	2715.81	2804.22	5998.82	7502.67	3042.05	6590.76	3078.97	4119.43	4345.53	4598.29	1671.89	2526.73	4526.28	5336.91	3681.91	6307.18	7914.45	3112.26	6985.61	3740.54	4086.74	5058.09	3481.62	4404.09	4820.4	4378.43	4540.12	4604.11
168	PE(16:1/20:5)	304.865	736.489	5805.28	5310.75	4976.5	5185.62	5186.98	5084.93	3765.23	13090.1	10617	5481.82	9735.19	6053.02	8565.4	9496.31	8279.79	3172.95	4101.02	7191.57	7810.81	6476.47	10450.3	14692.1	6327.14	13487.7	7554.76	6664.12	9736.43	6028.18	9036.46	8471.44	8500.05	8682.98	8481.82
169	SM(d14:1/24:4)	308.846	751.562	3910.43	6156.48	3523.4	3496.5	5656.65	5366.67	3892.99	4101.26	4738.79	2048.05	3483.45	2449.47	3163.95	3494.42	6944.29	1780.54	2295.86	4247.93	4068.77	3713.94	5446.04	17720.7	4501.56	9983.69	5453.95	4594.97	6528.87	4698.44	7796.7	4764.33	4945.84	5059.84	4855.22
170	TG(18:0/18:1/20:1)	770.052	932.858	25408.4	20660.8	21603.9	18762.2	16479.7	13009.4	9948.55	49500.7	53932.7	22742.2	33006.3	22408.9	26883.6	33930.5	38192.2	19341	19912.5	36986	37195	38141.8	57662	61890.3	29462.7	87218.8	41302.5	28245.6	52037.4	43209.5	43286.5	38417.2	37703.7	36092.4	36644
171	PC(16:0/14:0)	367.827	728.514	280411	270650	296397	288673	242343	246841	166223	286591	318622	149601	228865	140964	209096	209255	423899	182158	192389	401348	450945	359365	512493	767633	322214	704412	349380	322859	439891	343538	352804	333075	329507	320597	329791
172	PE(16:1/16:0)	384.446	712.483	15593.8	16520.1	16878.4	17869.6	14158.5	18335.9	10609.4	37493.9	37534.6	19009.3	28411	20380.3	25686.3	23431.6	32190.1	12133.5	13566.3	25962	33123.7	25160.6	37641.8	59321	27084.2	69429.9	30527	24337.5	39659.6	26988	26522.4	26310.2	27202	25558.1	23256.7
173	PC(26:1/6:0)	412.267	754.532	27043.9	24399.9	122141	122161	19160.9	25937.9	14638	136674	24872.4	13584	23352.8	12492.6	19962.8	38449.1	32602.3	75718	16865.6	31635.1	36923.8	26781.6	45479.2	63071.1	24208.7	61875.4	30161.4	23252.4	192364	134105	28996.6	26873.6	26678.9	26574.3	29203.7
174	DG(26:1/18:1/0:0)	637.752	750.691	2089.5	1874.94	1524.19	1421.7	1529.29	1325.36	1081.78	516.118	421.129	236.289	455.047	303.482	323.346	394.036	831.583	440.589	472.495	755.813	720.5	962.133	1093.33	1701.67	755.396	1680.75	827.27	541.637	1028.51	774.922	1222.93	1111.86	1179.89	1051.1	1119.27
175	PC(26:1/8:0)	424.579	782.562	365459	465952	568252	636617	409233	623052	322500	711508	724431	432910	495171	419269	550955	464635	966586	406629	411056	1.00226e+06	1.11904e+06	839099	1.57731e+06	1.63087e+06	720850	1.70029e+06	738860	613302	980695	730661	567762	555518	539154	531582	530187
176	PC(P-16:0/14:0)	394.738	712.52	43840.5	49367.4	59780	59203.5	41847.2	53158.7	30442.8	29756.2	33215.2	17221.6	21213.8	16427.7	22598.9	22166.1	39369.6	15927.6	17518.5	34258.2	38367.9	32082.5	45992.1	71049.3	29070.8	69201.5	29615.5	27384.6	37890.1	32109.4	40337.7	39971.6	36162.5	36040.2	35142
177	DG(16:0/18:0/0:0)	515.959	614.561	44349.5	44934.3	32751.8	34881	35760.2	33653.2	24442	77567.9	83587	32787.8	54938.3	35271.3	53126.8	52449.2	120086	51706	58241.6	101267	116667	86451.9	149183	159458	65972.4	127000	64977.6	59722.6	94498.9	65767.6	71416.5	72287.1	73645.9	78649.3	74927.4
178	SM(d14:0/20:0)	360.069	727.557	57562.6	56416.1	66819.4	62940.3	54336.1	62458.1	34969.2	76846.5	82170.3	38713.2	53747.5	38514.2	52213.3	47878.2	64384.8	26398.7	27183.6	55566.4	47447.7	48110.7	71743.5	111077	44897.9	89093.7	46246.2	43988.4	63401.6	47965.9	56167.1	58257	59113.3	57147.3	57247.8
179	PE(P-16:0/18:2)	420.321	700.522	225061	162927	175686	169800	233497	237796	116032	284207	311352	192194	205152	210991	210473	187366	288201	124871	100268	191155	332494	173763	283962	736568	290743	578671	260431	141870	357238	251950	228630	225842	229726	309776	222683
180	PC(26:2/11:0)	516.868	822.595	6539.55	6152.48	6505.13	6820.72	6053.28	5911.83	3357.65	5386.55	9676.67	3380.74	4788.89	3344.33	3600.57	3909.21	8148.25	2133.49	3210.33	4585.96	9830.29	4723.29	5185.42	13996.3	5575.39	15397.8	6435.32	5441.48	7397.6	5365.09	6277.28	6973.26	4510.3	6341.88	5498.98
181	PC(26:2/6:0)	329.715	752.516	150917	125308	128245	107084	118213	106190	74790.2	161993	207267	84544	120982	83792.8	114355	112819	133551	59367.9	67591.3	135364	159100	119083	157205	197886	87622.3	224113	104248	80634.7	132398	95212.8	131567	142601	139766	135682	142492
182	PA(5:0/27:0)	428.835	666.503	882.33	338.322	1556.87	1588.84	2640.54	875.649	1715.18	9859.06	16571.7	6803.23	10104.3	11653.9	11634	12062.5	7254.74	3545.61	5011.13	7948.31	7219.8	9325.72	17029.4	48340.4	14543.2	43169.4	21531.6	24333.5	20843.4	19235.5	14322.2	12428.8	13142.7	7658.74	13017.9
183	DG(18:0/20:1/0:0)	583.183	668.616	6235.13	6816.94	5644.97	5669.52	5834.8	5408.9	3635	7496.62	7761.12	3380.29	5098.72	3569.88	4888.96	4855.66	9600.94	4473.39	4647.34	8886.01	9542.78	8233.1	12865.3	14156.6	6157.51	12422.2	6316.21	5133	8369.14	6561.03	6868.39	6836.94	6941.2	7319.51	7219.76
184	PE(P-16:0/18:1)	455.451	702.54	1.05616e+06	960219	1.00393e+06	1.05509e+06	1.04381e+06	965305	727884	1.7087e+06	1.7134e+06	828320	1.24951e+06	821478	1.2929e+06	1.09632e+06	1.09764e+06	485124	576033	1.02371e+06	1.24717e+06	948589	1.46155e+06	3.72757e+06	1.44499e+06	3.54889e+06	1.91512e+06	1.43317e+06	2.54559e+06	1.69486e+06	1.52932e+06	1.4312e+06	1.46298e+06	1.51263e+06	1.51305e+06
185	Cer(d18:2/24:1)	615.548	646.615	808.393	735.028	786.098	705.269	647.998	719.422	410.652	726.364	767.815	332.656	495.458	366.385	478.94	489.989	964.363	406.031	395.168	825.284	867.132	844.632	1184.8	1430.47	547.602	1221.74	609.008	581.037	812.178	634.603	769.343	736.973	669.319	640.606	647.878
186	PE(18:1/20:5)	358.515	764.519	103197	106691	92057.4	100396	92618.6	90885.2	62977.8	116100	121657	54065.1	83552.9	56133.9	80572.6	85175.3	123530	46597.8	56907.9	102621	110918	86388.9	127308	201511	78997.9	170896	94793.3	87439.5	118641	86846.7	103533	110876	109923	109433	110999
187	DG(16:0/17:1/0:0)	497.62	598.536	13848.2	12641.9	10445.2	11598.8	11188.9	10521.1	7607.95	14004.7	14909.4	5814.58	8874.31	6157.31	8609.5	8621.14	17432.1	7643.17	8590.37	15248.9	17000.5	14621.9	20996.9	28562.4	12362.5	22657.4	13067.6	10256.8	18559.4	11771.6	14320.5	14636.7	14608.6	14518.5	14397.5
188	PE(24:1/18:1)	548.225	828.647	13555.5	27896	15381.8	8456.07	11691.8	7049.78	4592.92	10049.6	12349.8	5461.88	8987.94	5502.52	8893.76	13981.5	11339.7	4759.5	4900.94	7654.29	13804.5	9682.2	14221.6	17630.2	7855.21	19117.4	9796.08	8171.03	13486.2	9728.41	11406.5	13561.4	10204.9	11170.9	11002.5
189	PE(18:2/16:1)	349.992	714.501	35530.4	83765.5	36277	31080.2	33994.5	29470.1	21927.9	62740.7	69179.7	27644.7	45681.8	28655.9	41275.1	43616.3	41585.2	16251.9	22305.5	77957.3	43473	66734	47534.2	64274.7	28592.1	134677	33387.4	27744.6	45573.6	28715.2	47615	45443.6	43559.3	43778	44563.8
190	PS(22:5/18:1)	313.072	836.534	5875.33	5683.19	4335.05	5306.2	4473.7	4122.51	3170.25	4503.83	4136.65	1604.31	3200.96	1934.93	3141.23	3005.24	3166.59	1067.5	1594.12	3063.82	2557.93	2345.31	3378.34	5567.32	2524.19	5430.81	3088.31	2786.48	3684.88	2570.21	7443.42	4300.45	4527.71	4471.42	4131.79
191	PE(20:5/18:1)	349.075	764.528	47249	38351.7	38901.5	33157	38008.2	31089.9	26719.7	65021.6	61707.2	24068.2	43495	27850.8	46606.6	41349.3	32878.2	11412	15118.9	30233.8	21590.3	21202.6	30418.6	71209.3	31487.6	66493.6	33281.4	33767.2	44237.2	29877	53641.7	47102.1	44957.5	43042.2	43427.3
192	PC(26:0/14:1)	551.475	866.654	5304.1	4493.82	4822.19	3990.12	3809.76	3525.92	3875.16	3617.16	4418.35	1870.73	3077.81	2002.63	3044.81	3009.67	6380.19	2360.42	3346.48	5138.42	5714.12	5052.6	6429.73	9974.86	4407.91	10547.5	4609.27	4101.2	5814.37	4873.46	4841.7	4779.23	4599.59	4576.5	4700.6
193	DG(20:2/18:1/0:0)	571.395	664.583	526.428	365.792	443.501	610.352	741.18	449.212	386.103	1917.11	2561.78	1349.21	1712.76	1239.7	1910.4	1986.24	3842.13	1488.31	1691.16	3417.22	3681.76	2894.82	5267.17	8773.87	3473.44	7819.86	3969.65	4009.35	5488.23	3811.68	3434.8	2995.92	2666.11	2846.46	2790.22
194	PE(22:6/18:2)	339.485	788.518	11772.8	9886.18	9641.74	10143.7	9535.17	8878.74	6295.67	12226.2	13482.9	6163.6	9744.73	6089.84	8993.71	10767.6	13833.3	4981.3	6553.47	12023.4	11604.3	10304.4	12144.6	25307.3	9662.43	20874.7	11594.6	11080.7	16393.5	10065.3	13341.6	13135.9	12406.5	12439.1	13436.1
195	PE(P-16:0/17:1)	366.925	688.52	3828.3	3798.91	4767.99	3706.97	3707.61	3589.68	2145.51	4113.21	2352.55	1942.27	2628.33	1455.23	2572.01	2625.27	2848.23	1462.91	1618.85	3897.14	4095.84	2914.65	5398.25	3965.36	2866.71	5213.29	3228.21	2794.23	4517.36	3180.01	3712.67	2907.49	3528.75	3139.99	3430.15
196	Cer(d18:2/22:0)	528.114	620.592	6805.6	5858.02	4551.02	4910.54	3889.94	4591.7	3501.5	39749.9	37989.7	19097.8	26248.8	17166.9	21118.5	28196.1	36993.5	17252.2	20374.3	36987	50177.3	35809	46728.9	54988.5	26149.1	42009.7	23769.1	24342.3	35119.3	24816.5	28854.4	28304.3	28440	27324.3	28095.5
197	PE(P-16:0/16:0)	366.985	676.522	9146.03	15210.9	15659.7	12653.1	7000.17	9350.3	7865.84	12917.3	14621.5	6199.07	1549.72	6130.19	5574.9	9194.19	7275.67	3511.41	4499.8	9883.36	10142.3	8702.64	12623.1	13863	6773.84	17559	9958.22	6466.74	16462.4	8931.26	8308.16	10354.2	12446.1	8092.37	11660.6
198	PC(20:3/18:3)	348.142	828.546	47773.9	49035.9	51456.8	50230.9	42663.5	43420.6	29746.4	54648	54617.6	29304.4	39394.4	29587.8	41195.5	38089	71576.4	26553.1	34104.2	59946.5	54140.9	51682.5	70241.5	69705.6	28420.8	66569.2	34112.5	32656.9	47862.7	33834.3	48918.1	51756.7	50456.1	50124.7	50056.2
199	PE(P-16:0/22:5)	428.986	750.538	72214.2	62825.2	77997.8	85422.5	73546	71670	47408.7	116050	122481	66115.4	83534.5	64828.2	85782.5	77820	96021.2	39564.4	43331.8	76186.6	105084	71663.3	128302	765487	287446	702509	354419	299510	439885	333574	170612	168208	167332	175857	168292
200	PI(17:1/19:0)	344.333	882.591	29969	27753.3	25991.2	24558.9	23459.3	21232.5	15920.3	26540.5	26050.7	11796.1	18996.7	16603.5	19121.7	19194.5	26699.8	8301.02	13302.3	32864.5	18435.2	23980.2	24152.3	52511.7	27900.9	43984.9	24958.8	23461.2	42001.7	26289.2	29236.1	27846.6	27547.7	33816.9	24870.3
201	DG(18:0/18:0/0:0)	582.315	642.599	1994.91	1732.47	1727.22	1557.86	1772.53	1686.24	1077.89	6645.8	8092.19	3624.17	5437.65	3758.68	5827.22	6225.97	17021.9	7373.38	9177.08	15800.1	16247.6	14495.6	20769.6	17412.3	6769.87	14922.4	9368.97	8674.69	11412.7	7954.16	8640.75	7616.91	8122.77	8233.22	8020.05
202	PE(P-18:0/16:0)	493.876	704.555	12258.4	8977.85	10737.8	9816.33	9998.16	5308.09	6249.5	28381	35591.1	15896.3	22242.2	14279.2	22634.8	27470.4	17082.8	7287.65	9631.04	15024.5	17739.9	14596.2	24366.7	55644.6	23328	57905.4	34139.2	34988.6	39338.6	31426.2	31130.9	29102.4	29471.2	29827.8	29475.2
203	PE(O-18:2/18:1)	500.018	728.55	1150.74	1084.06	1318.93	1045.02	1331.92	1047.98	780.379	4319.77	4520.37	2382.08	3092.23	3097.83	2867.04	3703.21	7155.59	3065	3810.42	6292.26	7028.89	6050.44	9638.48	11881.4	5067.71	12157.2	7814.37	7361.05	8176.35	6544.89	5903.38	5266.04	5484.47	5173.11	5137.19
204	GlcCer(d17:1/16:0)	360.041	686.561	6462.97	6123.21	6499.85	5457.78	5870.43	5818.5	3346.57	9117.91	10853.4	4031.67	7584.08	5544.74	6276.61	7018.26	7316.39	2586.6	3293.36	5881.02	5691.97	5590.58	7577.3	13986.3	6127.01	10168	5589.36	6006.93	7678.81	5945.28	7683.74	7594.42	7784.16	8406.9	8069.36
205	PE(26:0/6:0)	426.362	692.517	39276.5	36030.2	41250.3	33295.4	36456.1	31777.6	21315.9	77589.8	99484.1	48781.7	72182.5	46892.6	69745.9	73334.8	161720	68924.7	90615.7	163032	195469	154244	228208	307114	133970	323152	181208	186258	197944	152115	128348	124465	120281	129184	124611
206	PE(26:1/6:0)	384.281	690.503	415620	421250	394575	390043	393611	410082	269766	1.25549e+06	1.46741e+06	590823	859331	643033	868548	808582	787935	350738	398879	763983	969239	633403	1.03886e+06	1.95905e+06	808672	1.84648e+06	1.01692e+06	745122	1.30601e+06	789679	868654	838773	849646	832561	810462
207	PE(26:2/6:0)	338.399	688.487	57632.2	55497.8	44765.9	49304.6	56080.7	49108.3	35499.4	174643	225044	79635.6	139061	82009.7	117662	132224	110364	42953.2	57231.7	104181	111018	85938.5	117458	168643	72181	158882	94385.6	74347.9	112611	70123.9	110132	105880	107762	107666	110885
208	PG(6:0/26:1)	306.228	743.477	1494.95	1426.8	1421.61	1293.48	1307.78	1417.93	1067.26	3326.28	4086.63	1862.12	2717.51	1909.19	2367.83	3005.68	2220.6	903.285	1176.7	2233.48	2486.34	1807.74	2966.09	4550.2	2179.69	4611.43	2484.16	2268.92	3674.25	2436.15	2618.45	2435.23	2534.97	2460.08	2703.75
209	PE(24:1/9:0)	408.281	704.518	50178.6	42202.4	41723	41048	42706.1	42308.2	26326.9	58600.7	65668.9	28283.2	40310.4	28784.4	40683.4	44094.4	46559.6	20264.6	23791.4	38030.8	51013.1	34244.9	52378.5	98628.9	37300.6	80922.6	50261.3	41627.2	62115.6	40568.5	51949.1	50646	50188.5	50248.2	50521.4
210	PE(24:1/10:0)	432.383	718.536	1.77414e+06	1.59052e+06	1.60489e+06	1648922	1.56125e+06	1.47888e+06	1.02236e+06	2.88526e+06	3.23055e+06	1.46478e+06	2.16607e+06	1.5158e+06	2.12597e+06	2.06855e+06	2.64915e+06	1.17407e+06	1.31701e+06	2.33e+06	2.92149e+06	2.11025e+06	3.30371e+06	6.10341e+06	2.4799e+06	5.68823e+06	2.96286e+06	2.39117e+06	3.78673e+06	2.7356e+06	2.56123e+06	2.43098e+06	2.56933e+06	2.5921e+06	2.49335e+06
211	PE(26:1/10:0)	475.637	746.568	1.17e+06	1.09987e+06	1.12514e+06	929645	987658	907056	662819	1.21485e+06	1.43116e+06	561031	894000	597793	839050	815437	1.171e+06	525570	623481	1.04082e+06	1.34599e+06	1.01981e+06	1.45899e+06	2.87295e+06	1.14797e+06	2.59177e+06	1.34398e+06	1.15891e+06	1.80367e+06	1.29798e+06	1.30687e+06	1.28843e+06	1.33442e+06	1.42565e+06	1.41611e+06
212	PE(22:2/12:0)	390.359	716.519	988838	967722	926666	915971	932340	1.01881e+06	637094	1.48015e+06	1.62978e+06	718823	1.04028e+06	706457	1.00327e+06	1.01044e+06	1.14362e+06	476882	564686	1.04448e+06	1.29434e+06	886564	1.41652e+06	2.05698e+06	836708	1.90783e+06	1.01714e+06	809489	1.29443e+06	849024	1.18199e+06	1.16871e+06	1.15152e+06	1.16586e+06	1.10027e+06
213	PE(26:2/10:0)	436.609	744.552	2.53998e+06	2.38361e+06	2.42048e+06	2.29767e+06	2.36135e+06	2.35085e+06	1.58167e+06	1.95207e+06	2.23201e+06	1.00763e+06	1.49783e+06	1.01992e+06	1.43985e+06	1.36575e+06	2.06975e+06	959293	1.08817e+06	1.92115e+06	2.40471e+06	1.66403e+06	2.8877e+06	3.91748e+06	1.54725e+06	3.90377e+06	2.0337e+06	1.51661e+06	2.52669e+06	1.8304e+06	2.30127e+06	2.21627e+06	2.3552e+06	2.34448e+06	2.40527e+06
214	PE(24:4/12:0)	365.414	740.517	42073.9	40414.7	44378.6	44141.9	39810.6	47182.5	31747.9	63686.1	68578	33282	41800.5	31879.6	41595	41810.9	64122.1	24654.7	30343.2	55487.2	64061.6	50862.7	80802.9	109624	44741.7	102236	53226.4	42097.2	71050.1	48939.7	52989.1	56661.5	53681.5	46731.3	49793.6
215	PC(18:0/20:5)	396.479	830.559	11243.6	14078.9	14726.5	16705	11611.3	16258.7	9440.32	31572.7	30681.4	19328.5	22425.2	16998.8	23799.1	22388.7	52701.3	22005.6	24347.8	46999.9	50930.8	41443.4	69064.4	93833.6	37238.3	93364.5	42555.6	33955.2	57546.8	39239.9	29864.6	28019.5	26966.9	28534	24193.7
216	PE(P-16:0/18:3)	385.316	698.506	10791.2	11808.8	11013.8	10513.6	11291.1	12641.1	7590.09	18632.8	20674.2	9980.34	16295.2	11343.7	14547.5	16261.2	18092.9	7918.39	8755.03	14399.5	17324.9	12428	22010.1	46681.7	17722	42164.9	20209.6	17329.6	28313.5	20956.3	19252	17977.2	18469.6	16781.2	17383.8
217	PG(8:0/26:1)	355.543	771.509	20865.6	19970.6	19780.9	18805.4	18162.8	19603.9	12683.4	42406	51141.8	21668.3	31887.5	23032.4	29479.3	32282.2	34456.3	14418.8	14348.3	34550.4	29510.6	24000.1	40857.9	59755.9	25362.8	53876.4	28264.8	19760.4	40515.4	28689.5	29122.7	28946	30955.5	30103	26523
218	SM(d14:1/25:0)	486.658	773.645	17268.4	14962.6	7782.21	4592	7843.94	7837.36	5862.34	14145.7	20080	6605.59	11640.6	6706.75	5777.82	10819.5	11578.7	4674.54	3859.72	9114.65	5856.5	8621.98	9837.36	25861.3	9028.45	15907	8307.07	8722.12	14487.8	9322.59	9982.16	13012.9	9735.42	10864.9	10911.5
219	SM(d15:0/18:2)	281.55	687.537	1102.17	1062.98	1031.32	1064.7	902.11	1087.02	783.162	1434.09	1228.49	463.342	728.291	601.696	683.354	918.485	1055.9	357.704	408.129	881.464	778.976	869.09	906.408	2249.03	1080.39	2397.53	1091.02	908.257	2064.4	1586.62	1159.14	1118.77	1475.75	1049.25	1253.06
220	SM(d14:0/16:1)	238.143	647.506	669.428	673.238	698.64	752.321	682.974	659.367	414.778	511.06	623.472	241.599	383.892	300.935	354.603	366.49	455.286	194.916	218.034	479.72	471.205	383.545	602.04	1278.82	442.337	1238.95	516.751	427.873	835.021	578.347	611.629	644.585	602.677	574.148	682.649
221	SM(d14:1/22:0)	448.399	731.617	1755.95	1386.36	1494.2	1366.55	1209.16	1036.69	794.101	5319.39	5898.54	2916.5	4059.58	2960.99	3149.6	3370.26	3333.24	1219.28	1388.92	2020.21	3279.17	2641.99	5022.25	8047.13	2872.2	4904.87	3842.82	4299.71	4962.43	3465.56	4236.28	3039.27	2224.03	4618.17	4344.58
222	SM(d14:2/26:1)	481.147	783.629	6655.35	5770.83	6265.08	5467.13	5428.62	3844.76	2678.75	3678.47	6182	2782.5	4423.32	7110	3238.22	4394.25	4928.89	2159.37	1616.3	4191.45	5258.29	3687.64	5704.26	6643.95	2766.15	4576.6	4447.46	4592.42	5851.73	3128.02	4479.88	5181.15	5226.03	4725.47	5271.14
223	SM(d14:2/20:1)	324.578	699.535	4298.49	3152.41	3164.93	5211.66	3517.72	2965.75	2131.94	2953.37	3471.31	1315.46	2153.5	1347.9	1914.14	1958.32	1595.19	778.37	1007.56	1839	1816.94	1409.66	2213.65	5431.7	2382.63	4226.71	2192.93	2478.91	2927.25	2513.26	3583.53	3211.08	3228.54	3281.64	3505.33
224	SM(d16:2/26:1)	524.059	811.662	50983.8	40573.2	12544.2	11007	43415.3	10695	26026.2	13785.1	19783.7	7876.51	11849.6	7885.69	10129.3	12234.2	13824.9	6633.81	6719.09	12901.8	15398.1	12584.4	18582.6	28416.3	11454.3	25186.8	12927.8	12983	17978	14536	16561.2	14594.2	15718.9	16440.1	16183.1
225	SM(d18:2/26:1)	562.746	839.691	7481.09	5764.37	7114.85	6164.5	7671.74	6369.4	5284.59	5588.32	7389.56	3478.09	4612.19	3766.09	4388.31	5066.87	5984.46	2860.27	2881.85	5632.44	5918.55	3958.78	18893	16525.9	15294.3	16619.1	8604.18	8181.78	11412.9	9711.15	8658.16	7999.41	7691.28	8208.56	7847.57
226	PE(26:2/12:0)	477.321	772.583	91211.8	100153	98461	184040	98442.3	78138.5	53184.5	79923.2	107222	42185.2	58542.5	39529.1	56267.3	52317	81344.9	34383	41911.9	71169.4	83932.8	66231.1	99863.2	178574	67770.6	154802	83974.2	67656.7	106835	75356.2	94466.3	95267.9	89413.2	90908.8	88052.8
227	DG(18:1/16:0/0:0)	480.267	612.545	11886.1	11193.8	9363.53	10130	10415.2	10941	7188.52	17725	20699.6	6734.39	12412.7	8146.91	11128.3	10774	21285.2	9932.77	10472.9	17804.4	21321.8	16237.9	27532.1	348206	144631	374777	140871	171138	305848	233909	70170.8	67991.5	69156.3	66742.1	64282.9
228	SM(d22:1/24:4)	545.81	863.692	7269.59	5404.68	5961.05	5402.52	6296.01	5036.98	3902.21	4185.31	4859.42	1805.6	3076.96	2141.07	2305.59	2832.81	2292.23	1366.38	1290.07	2471.24	3118.97	2428.52	3513.14	6753.22	2343.06	4637.45	1886.25	2556.94	3883.96	2493.08	4398.7	4233.44	4552.62	3944.56	4055.74
229	SM(d21:1/24:4)	526.164	849.675	6822.16	5323.5	5997.89	5058.42	6446.19	4941.24	3734.14	4009.64	4764.66	1717.45	3509.16	2374.09	2643.62	2759.93	3167.36	1367.72	1279.64	2896.79	3181.67	2618.68	3644.37	7872.52	2721.17	4735.52	2581.55	2715.5	4167.17	2880.92	4366.92	5210.59	4212.32	4100.29	4623.98
230	SM(d19:2/18:2)	321.377	739.561	567.086	411.184	492.974	602.751	459.053	401.568	304.216	745.14	764.579	319.391	539.72	334.599	538.283	459.714	674.524	274.204	311.733	647.208	643.778	568.753	956.928	1358.84	498.135	1003.58	571.644	556.905	705.808	564.45	726.624	552.022	612.798	676.113	591.261
231	SM(d19:1/24:4)	466.201	821.649	4943.58	4381.03	4937.33	4393.98	4195.03	4071.16	2792.67	7990.73	8437.34	3999.82	5558.31	4071.56	3179.14	5250.68	9367.6	4042.1	3740	10866.6	10188.9	8944.15	13315.5	13609	7181.5	15711	5553.61	8115.22	9761.49	6896.06	7012.91	6459.46	6474.01	6352.39	3980.91
232	SM(d21:2/24:4)	530.818	847.675	1181.94	1774.53	1100.46	1141.68	1510.03	1053.27	735.26	1988.07	2542.65	934.518	2144.01	1126.07	1420.59	2101.18	2694.77	1062.31	1423.15	1883.48	2846.71	1899.36	2966.9	3381.4	1134.73	2779.16	1436.52	1464.67	2003.11	1415.64	1780.5	1694.1	2335.05	1999.91	1713.58
233	SM(d17:0/24:4)	486.882	795.627	6947.66	2852.02	4577.2	3823.45	4300.69	4185.28	1589.17	6037.32	8085.13	3149.55	4783.77	2979.86	2796.04	4750.25	3489.65	1426.76	1538.89	2780.21	2517.29	2727.51	4295	8754.8	3186.34	4711.59	2576.23	3652.24	5178.07	3566.79	5004.93	5197.93	4695.77	4971.28	4778.51
234	SM(d18:0/2:0)	99.235	509.374	272.866	243.387	284.647	351.984	254.726	296.95	178.628	548.34	1005.54	292.239	585.333	235.244	432.398	403.763	635.014	297.126	576.672	1055.69	533.831	493.513	773.964	1865.36	541.916	871.093	427.722	426.885	774.529	474.307	656.641	893.038	741.456	524.931	518.036
235	PE(P-16:0/22:6)	397.468	748.528	1.31557e+06	1.1199e+06	1.17591e+06	1.07888e+06	963886	1.00181e+06	615388	2.28946e+06	2.40158e+06	1.17771e+06	1.70196e+06	1.09547e+06	1.6456e+06	1.66475e+06	1.18713e+06	495949	570042	940862	1.21851e+06	853816	1.33923e+06	3.71466e+06	1.5266e+06	3.37406e+06	1.8646e+06	1.65859e+06	2.50823e+06	1.67923e+06	1.75844e+06	1.6401e+06	1.69014e+06	1.65339e+06	1.71071e+06
236	SM(d15:2/24:4)	339.216	763.558	1271.71	831.946	587.376	991.918	942.216	761.798	676.979	1717.92	1778.31	632.137	1149.57	941.669	1265.1	1010.18	1135.68	537.261	691.843	1553.88	967.322	1027.34	1152.25	4175.15	1278.71	2736.8	1695.01	1496.12	2470.6	1695.55	1511.99	1462.64	1598.91	1565.09	1321.38
237	SM(d16:2/24:4)	366.099	777.575	9203.64	8658.74	10478.8	9953.59	7673.58	7667.98	4778.72	7431.31	13693.3	9285.3	7795.84	3816.91	8290.02	7949.93	7754.49	5245.19	3882.39	9249.89	11039.4	7281.69	9716.48	230392	98525.8	213077	100315	96464.1	146264	133820	44714.5	42745.9	37497.7	39537.8	51312
238	SM(d16:1/24:4)	395.6	779.599	3294.37	2923.65	3318.7	2549.21	2289.08	1895.78	1952.49	4188.65	4395.12	1817.85	3483.8	2219.31	2642.19	2779.97	3378.09	1918.49	2281.89	4150.74	4585.23	4167.58	6423.28	15153.4	6058.76	12902.6	7668.12	6204.82	8228.39	5958.1	5523.43	5279.84	3605.14	5675.03	5245.13
239	SM(d17:1/24:4)	471.229	793.63	2516.29	4490.29	5449.88	1286.33	5102.14	3966	2379.71	5934.06	6762.37	3327.45	3553.9	3150.5	2868.29	4324.21	6345.5	3050.05	3258.53	4322.89	5229.9	4709.23	7750.18	8044.67	3515.39	8532.03	3543.36	4506.46	5371.51	4811.58	3638.31	5046.25	4398.83	4472.26	4761.71
240	SM(d19:2/24:4)	494.87	819.646	2825.08	2484.44	2635.04	2383.94	2368.92	1755.94	1144.08	7431.58	10373.9	4234.65	6246.44	3860.07	5572.71	6015.89	7483.63	3325.43	3373.33	6551.31	8894.44	6030.31	9138.95	11244.4	4171.24	9658.61	5186.38	5139.21	6350.87	5059.5	5525.98	5536.29	6055.65	6345.62	5990.26
241	PE(22:4/14:1)	352.563	738.502	71376.6	64536.9	59507	92351.7	58533.1	52810.4	62552.7	245040	166988	81397	128248	80027.5	116271	120890	140617	57160.8	72604.2	116935	131574	173290	158687	313389	115046	322821	144565	178905	190658	124106	137546	136083	133267	132233	132494
242	PC(22:4/16:1)	363.401	830.552	11307.5	11960.6	13431.3	14480.4	12052.8	12320	8619.13	18386.3	19692.4	11414.4	14939.5	10494	16047.9	14918.7	25727.2	10569.2	12381.1	22283.5	23043.9	21263.4	29285.6	35790.8	13688.1	32457.8	16825.5	14874	22906.9	15612.9	17879.7	17498	16570.5	17386.8	16070.7
243	PE(24:4/14:1)	392.771	766.535	540884	499905	508963	498639	468950	461602	330542	569010	600653	302213	436278	281608	427852	409586	678522	271451	333375	562519	708361	524450	877999	1.20769e+06	488124	1.04289e+06	567187	512557	741432	506518	587718	609189	599539	608465	553591
244	PE(22:2/14:1)	386.861	742.526	69040.3	47277.3	69547.6	66681.6	49262.2	72751.5	34302.4	74781	81218.4	52117.2	81432.7	36726.1	63955.9	65796.5	124983	45330	51489.7	92366	87019.2	92882.3	169101	229914	91539.3	190363	89240.9	77681.2	110520	100389	81385	71975.1	76586.2	72775.9	75930
245	PE(24:4/14:0)	435.712	768.551	886336	884169	910253	870546	725019	750148	526125	1.07309e+06	1.1795e+06	566552	803885	572600	853506	786333	1.24553e+06	552926	582516	1.00846e+06	1.31024e+06	994710	1.63373e+06	2.39856e+06	966636	2.09463e+06	1.08118e+06	945004	1.3985e+06	1.11246e+06	1.10807e+06	1.07322e+06	1.10682e+06	1.11944e+06	1.12517e+06
246	PE(20:1/14:0)	390.235	718.524	81228.6	79476.7	77148.1	75662.6	78928.8	77523.5	51119.9	138209	136664	60382	90165.3	60143.9	85573.5	87217.4	103589	43550.6	51227.3	89417.4	114899	79780.3	123244	192364	74602.3	172333	97769.2	80316.8	117627	76163.7	100790	101411	101121	101570	99288.2
247	PE(20:1/14:1)	350.592	716.507	4031.24	4987.31	3131.16	3415.44	764.218	3398.71	2299.31	6034.77	7162.78	3161.61	5069.68	2965.53	4646.7	4385.81	4366.8	1974.06	2406.88	4295.28	4281.87	3448.21	5147.86	7990.84	2336.46	5649.57	3655.15	2551.34	5215.27	3172.51	4702.32	4868.78	5058.9	4785.37	4993.73
248	PC(15:0/22:6)	332.326	792.567	20758.1	15648.6	12088.5	14999.4	15013.7	12185.6	8946.75	21442.8	26887.3	9605.2	17748.1	12481.7	19075.3	18106.7	20255.6	5644.4	8377.12	17296.3	18626.4	14867.6	25782.6	23579.3	11891.8	52254.5	16762.9	12573.7	26038.9	14241	22606	19549.8	19752.3	23724.6	17614.9
249	PE(24:4/16:1)	437.194	794.566	88842	91226.5	93885.5	84908.3	78038.9	84156.8	55319.8	124707	140469	65623.8	100111	67856.7	98219.8	95838.2	128942	58626	65296.1	106533	142271	104693	169055	326914	131213	308756	161285	20184.1	201406	157752	125802	130900	137624	135757	133949
250	PE(22:5/16:1)	373.841	764.517	109618	106584	106142	117815	93119.9	98399	71741.9	189798	183743	102379	144472	100189	135651	124371	226079	85841.5	100817	184443	229631	162371	457903	494726	190254	435690	228998	193683	297425	219529	179463	173710	171111	175737	178354
251	PE(26:1/18:4)	548.905	850.649	7843.89	6723.67	7385.58	6042.39	5886.79	5428.47	3709.47	7357.34	8701.33	4018.81	9518.61	3652.18	4895.14	5306.95	13292.6	3298.84	6589.55	11876.2	10397.3	7232.22	10027.1	16686.8	3866.28	19043.3	4873.85	4409.6	6670.78	4685.39	14951.5	6214.65	7739.87	6094.04	6247.88
252	PE(22:2/16:1)	435.923	770.565	103411	110304	100850	85237.8	26315.3	22669.3	57421.1	164049	184979	84471.6	119257	80192.5	99580.6	25825.5	123722	47881.5	76510.3	98014.9	98484.4	101660	171850	286239	147540	242121	106048	115196	124319	159197	128095	129313	139563	129591	121214
253	PC(26:2/13:0)	493.284	850.624	4443.96	3775.77	3404.99	3449.56	3473.47	2183.81	2590.02	1160.48	1713.6	629.978	1127.21	723.21	1145.13	995.079	1757.46	382.476	573.619	1404.76	1622.02	1127.63	1415.33	2447.94	1081.16	2381.14	1734.32	1083.32	2029.81	805.577	2268.3	2264.78	1805.44	1800.45	1891.77
254	PE(22:4/18:4)	392.3	788.516	23741.3	21947.2	26091	26127	31550	23530.7	14731.6	28213.2	27719.7	15335.5	22872.5	13711.4	19877.9	17739.3	33484.9	11430	16730.5	20351.8	35740.4	23038.2	41470.8	53530.6	21211.8	51752.3	32239.2	22045	37535	27907.5	29968.4	27834.8	27869.6	20017.4	27148.3
255	PE(17:0/15:1)	338.48	690.492	5274.32	5070.81	4442.92	4608.28	5076.73	5086.75	3582.34	16770.8	19462.5	7394.05	13120.9	7702.53	11278.2	12029.9	12030.5	4179.63	6189.89	11163.2	10876.9	8939.42	12522.1	18067.4	7676.62	16045.3	10414.6	8116.24	12141.7	6827.61	11500.8	10114.7	10660.9	10418.4	10005.1
256	PE(22:2/18:4)	422.893	792.549	161217	175929	188772	183201	154166	182212	113722	181654	195105	100990	131805	106069	144488	131009	225415	97675.2	102448	185267	259765	192149	308716	525256	217559	538006	241828	215448	329182	244697	205972	202410	211436	211951	206524
257	PE(22:4/18:3)	379.309	790.532	144822	142223	145267	139561	139154	145657	94399.6	115522	125677	60430.9	84275.6	60099.2	102726	82141.6	156193	63768.9	68799.1	118264	159600	117787	181413	240582	94487.8	230293	121087	95693.4	154880	109423	134712	130195	131539	131325	133038
258	GlcCer(d18:2/24:1)	481.214	808.659	2133.58	2295.46	2374.08	2150.93	1130.66	1287.73	977.994	8173.32	13319.8	5841.41	9094.61	5566.71	9846.53	8293.78	12706	5687.5	6712.36	12577.1	15258.6	11620.4	15071.2	20609.5	6522.92	17944.6	9474.27	9430.97	12626.5	9195.61	8607.93	8926.25	9521.57	8880.39	9420.91
259	PE(20:4/18:4)	352.752	760.485	3050.4	2691.97	2465.65	4022.36	2354.13	2725.89	2091.22	7802.77	7723.77	3001.33	5207.71	3924.03	13874.5	4416.91	7699.01	2348.21	2721.81	5067.34	5693.18	9441.07	7122.07	14472.7	5341.61	8309.13	5621.76	4858.9	8201.41	5936.5	5419.13	5985.34	5532	5657.16	5647.79
260	PE(24:4/20:3)	550.19	846.595	2104.24	817.787	1911.29	1925.6	1456.94	2122.77	1048.98	2329.13	2134.36	817.629	1453.22	565.053	1415.84	1200.84	2775.48	1018.91	1067.67	2024.87	2069.09	1765.63	3034.01	3028.67	1765.29	3656.18	2200.2	2172.47	2112.24	1880.73	2420.38	1833.48	2182.6	1768.45	1262.92
261	PE(22:6/18:1)	435.872	790.531	33648.2	41974.2	45413.4	38561.9	40175.6	39606.1	22008	46196.3	52121.2	28664.9	44329.1	34478.7	33458.5	33024.4	55908.5	22587.4	31164.5	61618.9	57494.8	58639.3	154405	95488	55958.3	101554	43600.6	34789	79260	62109.3	40842.7	43918.4	41042.8	41220.2	45920.4
262	PE(22:4/20:5)	422.917	814.53	5948.84	6552.21	9596.84	7540.12	4679.27	13974.9	4640.22	9778.03	7614.83	4467.57	5023.74	4651.5	5620.74	6417.68	12098.6	3823.04	4275.2	13042.9	11965.4	8901.81	16433	23981.2	8077.26	21683.7	8537.07	9196.76	14167.3	11616.9	8706.62	8861.35	7932.62	7868.17	9949.58
263	PE(20:5/18:4)	304.462	758.472	361.942	681.284	623.444	648.451	600.334	669.183	418.746	872.388	1460.79	622.208	856.329	621.847	863.135	897.684	1087.05	398.074	486.08	1244.98	921.173	783.643	1072.87	1608.21	807.996	1734.64	793.945	828.991	1112.33	825.292	970.097	1040.94	913.321	872.297	958.172
264	PE(17:1/17:2)	301.138	714.498	2116.44	1772.3	1473.16	1506.23	1641.2	1458.32	1051.67	1480.57	1660.19	580.314	1130.69	640.926	931.567	1032	951.354	326.242	465.267	881.043	711.51	646.14	962.473	3149.21	1178.64	2502.46	1273.67	1212.96	1977.82	1308.39	1706.18	1584.66	1586.45	1618.55	1608.38
265	PE(O-18:2/22:5)	417.707	776.553	76071.1	70209.2	77750.5	71539.5	69588.4	69729.9	63097.2	57767.9	65735.3	32126.5	43077.5	35981	47787.8	38592.6	50494.1	23833.4	26644.2	44497.8	57405.4	65133.4	71983.6	116593	46763.6	115817	58907.4	38229.2	76603.7	50071.3	61561.3	56527.6	58297.7	80091.2	54689.8
266	PC(8:0/26:1)	423.763	760.582	3.76233e+07	3.79768e+07	4.23065e+07	4.00044e+07	3.40312e+07	3.68366e+07	2.32346e+07	5.27318e+07	6.06642e+07	2.856e+07	4.06601e+07	2.98909e+07	4.46738e+07	3.90307e+07	6.28586e+07	2.62641e+07	3.01233e+07	5.81062e+07	6.70834e+07	5.04875e+07	8.19197e+07	1.04816e+08	4.41786e+07	1.00271e+08	4.95266e+07	4.41784e+07	6.66215e+07	4.60186e+07	4.62879e+07	4.85193e+07	4.78958e+07	4.80384e+07	4.82768e+07
267	LPC(18:0/0:0)	111.12	524.367	4314.04	3857.33	3803.59	4424.97	3511.21	3556.83	2621.07	22255	35487.4	10828.2	17227.3	10667.2	17274.3	17452.5	31815.1	10927.3	14074.8	33056	18601.1	22904.1	25166.4	103030	36872.6	75107.6	40419.2	34808.6	50797.2	35343.9	25646.7	24758.7	25408.3	25732.9	23933.9
268	PE(P-16:0/22:2)	503.927	756.585	54535.4	51675.3	54758.1	49784	49897.6	46190.1	29958.9	60619.5	64429.5	29040.1	44047.6	31464.3	43779.2	42979	49706.7	20101.7	27641.6	41909	53024.2	43712	62665.9	115989	47500.4	106685	57363	49452.8	70999.1	55389.8	58137.8	56369.8	66792.9	63081	67044.7
269	PC(28:0/14:1)	587.346	894.686	2560.37	2341.78	2888.21	2561.96	2173.38	2207.95	1562.58	1902.54	2032.59	1080.46	1507.5	1266.23	1666.64	1842.56	3068.53	1538.78	1608.17	3031.69	3292.23	2973.4	4343.04	7299.98	2636.33	7632.73	3067.3	2671.81	3438.78	2988.33	2866.44	2964.74	2736.08	3011.54	3173.43
270	PS(22:4/18:0)	381.659	840.563	22197.5	20854.3	11171.5	20528.3	16705.4	16409	8872.24	42574.5	51409.3	24493.9	37068.8	23095.8	37091	37685.9	61725.5	24892.8	36771.4	75152.7	53067.1	58028	85681.2	110118	42647.3	125279	63910.3	55862.2	69473.6	53810.3	48799.5	48055.8	43235.2	46996.1	54438.3
271	DG(17:1/18:1/0:0)	501.203	624.551	8909.95	8784.76	7359.73	7196.67	7295.31	7244.64	5272.96	6509.46	7214.07	2378.46	4409.75	2793.71	3516.35	3826.15	7516.86	3673.24	3775.25	6297.24	6768.07	6208.25	10154.4	14864.5	6400.2	11450	7250.33	5055.84	9892.59	6170.37	7841.4	7263.45	7692.84	7502.85	7831.93
272	LacCer(d18:1/24:0)	490.971	974.734	3333.89	2884.21	2964.22	2977.1	2624.19	1848.14	1650.65	3557.85	3846.96	1467.82	2247.78	1507.78	1483.08	2240.97	3516.49	1408.44	1573.59	3184.52	3162.08	2878.06	3801.16	5336.94	2177.37	4102.06	2370.55	2169.31	3062.28	2337.57	3075.77	3063.46	3196.37	3255.93	3090.02
273	GlcCer(d18:1/24:1)	513.128	810.674	34827.9	20760.8	25110.2	37570.5	15962.9	15254.4	13543.3	84008.6	113093	78732.9	114475	80971.2	98412.6	84522.5	142907	69988.2	59530.4	113694	162781	114046	179205	218334	55779.1	164516	96440.2	96784.3	132367	98437.4	66885.6	70036.5	90065.5	72182.6	123868
274	Cer(d18:1/26:0)	618.705	678.67	888.3	793.272	849.196	776.542	865.035	859.134	597.124	2646.95	3077.44	1342.05	2039.74	1402.08	1865.67	2106.67	3400	1326.85	1737.77	3051.99	2993.84	2707.97	4138.01	4622.11	2130.23	4231.95	2414.86	2228.67	3150.45	2155.67	2653.7	2516.99	2475.61	2545.11	2449.54
275	PE(P-18:0/22:1)	567.658	786.63	4738.18	3551.35	4472.9	4256.94	4223.78	4158.81	2583.36	3635.69	5593.71	1780.29	2899.14	1922.31	2479.81	2679.07	3414.31	1370.84	1546.29	2807.69	3470.52	3617.91	4061.59	8217.77	2871.22	6435.01	3280.92	3051.6	4314.16	3359.49	4372.43	4119.01	4070.13	4000.78	3931.17
276	PE(P-16:0/22:4)	444.981	752.555	146746	122265	127440	113969	111422	100657	69908.7	180734	196707	91404.1	139389	89203.2	138581	131650	110357	45490.3	57471.9	89130.2	115476	81225.9	128654	356644	139134	296658	178736	164126	228816	158273	158645	160915	166958	162721	174448
277	PC(20:3/18:4)	314.114	826.53	6815.32	5233.44	5079.95	4543.45	4901.28	4209.61	3077.51	6772.22	8255.54	3005.17	5645.71	3035.5	5207.67	5515.2	5853.01	2307.11	3315.26	5070.7	5625.01	4193.94	6007.27	6098.37	2240.17	5176.67	2860.42	2449.76	3562.34	2075.94	5643.23	4341.14	4714.51	4796.41	5094.19
278	PE(P-18:0/22:6)	444.841	776.557	81448.1	73664.1	64793.5	63107.2	54662.4	49470.6	37206.5	112828	120942	59340.2	83744.3	56382.4	87693.5	79253	59242.8	28088.4	31987.4	48861	68399.2	49850.8	75337.4	199578	80410.2	168888	96061.6	83537.4	130285	98677.8	87453.3	88509.6	96204.6	94024.5	104010
279	PC(16:1/20:4)	293.149	780.538	1787.5	1578.94	1573.62	1487.3	1532.07	1342.61	994.626	3018.17	3098.11	1488.75	1872.01	1232.37	1773.17	2020.99	2954.61	1003.33	1120.53	2157.54	2598.6	1849.87	3280	3435.81	2174.29	3593.36	1584.15	1619.38	2570.6	2107.97	2752.17	2535.31	2622.05	2479.73	2739.09
280	PS(16:0/16:0)	285.312	736.527	431.01	200.168	528.405	467.426	481.344	406.845	352.579	817.552	817.685	329.288	389.081	356.814	524.118	533.898	681.124	285.928	312.552	659.624	650.108	551.223	802.287	3567.25	1403.87	2760.7	1619.44	1494.03	2223.68	1609.16	1055	927.624	919.748	885.911	1003.46
281	PE(P-16:0/24:4)	487.123	780.584	10302	9295.86	11009.2	17322.2	9143.33	8697.76	5851.67	14844.7	14688.4	7321.37	10407.3	6879.38	9618.02	10413.4	11816.7	4902.2	5833.54	9961.88	12613.3	9776.81	14614.5	43901.2	11201.7	22013.2	12997.2	11971.9	17624.8	11163.7	19998.8	9667.73	9372.8	8787.69	22043.1
282	PC(2:0/38:0)	588.086	846.688	2303.45	1928.59	2076.89	1883.73	1768.72	1625.78	1319.53	1658.7	2122.9	1032.37	1771.02	1015.2	1432.96	1694.63	3189.75	1419.04	1668.02	2980.57	2929.47	2992.37	4392.24	7007.95	3034.96	7559.46	3901.83	3198.16	3977.05	3505.99	2981.57	3350.42	3071.18	3142.09	3102.25
283	PC(2:0/37:0)	580.532	832.665	1219.42	1273.68	1105.87	1414.48	1175.77	1176.29	827.697	1233.39	972.566	310.021	756.916	549.86	435.364	664.42	1114.23	439.932	720.43	1033.22	794.726	985.265	1799.6	2331.01	550.164	2011.68	867.475	816.247	758.162	940.091	1448.87	1085.54	1159.71	752.918	1075.59
284	PC(5:0/39:0)	654.27	902.754	500.836	398.285	539.345	425.41	396.411	470.131	348.151	1314.98	820.326	612.048	812.579	662.269	687.234	519.809	862.525	530.048	434.86	844.015	913.161	733.642	969.289	2875.77	984.964	2067.65	1028.74	1112.4	1577.77	1330.18	1174.65	944.243	995.202	981.889	740.467
285	PC(2:0/33:0)	480.264	776.61	22786.9	19316.4	18584.8	17070.1	19349.5	15963.3	11802.1	30061.1	32902.2	13040.4	23198.1	14569.2	18334.9	20912.2	33658.7	13279.6	15599.5	30008.1	49715.4	40629.9	37778.3	58465.5	22669.1	39823.9	23507.2	23114.7	30999.6	21073.8	28842.3	28221.1	27445.4	27980.4	28214
286	PC(3:0/33:0)	471.177	790.621	332326	303707	310306	289132	255966	218900	175402	581454	669204	295020	462502	314037	488775	447888	727202	301968	372689	649787	737838	564925	826050	1.1896e+06	459479	971652	536142	485306	724293	486375	542743	538036	545010	540240	550386
287	PC(2:0/32:0)	466.898	762.598	758587	560835	636591	561119	666657	447506	362430	2.45325e+06	3.36727e+06	1.36739e+06	2.11745e+06	1.40101e+06	1.89597e+06	2.19411e+06	4.75735e+06	1.98564e+06	2.36926e+06	4.31271e+06	4.88908e+06	4.12504e+06	5.48796e+06	6.91857e+06	2.89907e+06	5.42396e+06	3.12557e+06	3.50606e+06	3.93185e+06	2.98543e+06	3.04847e+06	3.04885e+06	2.94732e+06	3.08288e+06	2.96594e+06
288	PC(2:0/31:0)	475.531	748.571	104368	95581.3	94400.5	80105.3	87710.8	80408.9	57302.7	110871	122642	52787.3	83224.6	54054.1	76114.4	76754.3	108032	50129.5	57986.7	96597.5	125585	94884.3	133088	239267	109593	229218	120782	103469	158176	114560	110993	113106	117270	123720	122971
289	PC(2:0/29:0)	393.786	720.55	1.17895e+06	964127	960229	889693	951706	1.05762e+06	573359	1.59612e+06	1.82653e+06	759175	1.54613e+06	779451	1.17461e+06	1.5506e+06	2.22089e+06	878715	1.26998e+06	1.87578e+06	2.50973e+06	1.82429e+06	2.40946e+06	4.38136e+06	1.49071e+06	3.50748e+06	2.02694e+06	2.05174e+06	1.94433e+06	1.51727e+06	1.75608e+06	2.17201e+06	1.73219e+06	1.8084e+06	1.7346e+06
290	PC(3:0/37:0)	550.477	846.678	7485.5	3322.35	7118.48	3239.97	3102.76	2617.42	2121.14	4428.6	4688.31	2011.13	3220.22	2159.07	3288.72	3046.86	5602.35	2398.63	2768.37	4970.69	14284.5	10267.2	15903.4	10942.1	4512.14	9187.6	4850.25	9831.68	5908.68	5190.32	5621.24	4412.01	5233.9	5171.73	9814.59
291	PC(14:1/27:0)	583.301	858.714	1434.81	1265.77	1296.32	1344.11	1197.85	1037.04	672.281	1135.13	1160.03	473.88	712.352	552.752	817.704	766.516	981.486	526.196	556.852	966.023	1401.17	1006.99	1568.58	2283.85	922.421	2436.19	1100.73	896.898	1488.56	1054.43	1112.13	1226.32	1150.96	1198.43	1199.09
292	PC(13:0/26:1)	549.145	830.683	4019.49	2908.55	3630.19	2707.37	2713.29	2326.23	1510.66	896.693	4196.59	1645.29	2482.89	1613.54	1092.67	2636.19	4013.02	1747.17	1484.09	3627.02	3933.76	3133.4	6116.39	6236.12	2303.44	6013.12	3308.89	2458.93	3925.31	1335.18	3823.84	3386.39	3663.31	3585.92	3972.75
293	PC(2:0/19:0)	95.2295	580.392	333.279	385.97	530.812	575.301	290.589	428.881	242.421	667.257	698.979	257.078	441.435	369.128	403.298	355.813	636.574	435.344	438.567	2691.91	1180.63	916.087	1700.96	1106.47	385.636	679.203	322.678	272.825	754.936	432.154	668.493	568.597	613.625	663.764	581.107
294	PC(9:0/26:1)	447.39	774.597	510254	505598	470705	456978	385907	376250	287671	553754	569726	269981	424277	382773	610057	406382	805922	264277	322430	581066	599892	466857	732064	1.38138e+06	407374	886663	498566	570954	660987	454149	579482	561999	564212	539472	575837
295	PC(10:0/26:1)	471.177	788.614	3.54694e+06	3.29889e+06	3.37623e+06	3.07657e+06	2.67946e+06	2.36929e+06	1.89891e+06	6.22271e+06	7.11787e+06	3.13167e+06	4.99725e+06	3.23751e+06	5.15402e+06	4.61999e+06	7.77858e+06	3.26333e+06	3.90066e+06	6.90986e+06	7.83509e+06	6.16959e+06	8.8219e+06	1.2697e+07	4.95814e+06	1.05911e+07	5.70789e+06	5.24436e+06	7.95992e+06	5.24097e+06	5.80454e+06	5.59889e+06	5.67669e+06	5.86832e+06	5.9147e+06
296	PC(12:0/26:1)	472.966	816.633	140258	142460	123461	115245	118232	99616.8	73934.6	79314.1	86735.7	39111	61664.3	39529	62366.6	58951	85751.6	36164.2	49188.2	76601.1	92604.5	66926.7	99880.1	134885	58396.2	126289	74307.7	58777.4	87662.7	60489.6	107825	98006.1	112178	99077.7	104022
297	PC(14:0/26:1)	550.739	844.673	22431.6	18830.4	19428.3	17598.7	17300.6	15003.8	11605.2	21453.7	23938.8	10224.8	15831.1	11104.2	16418.5	16626.8	32714.6	12936.5	15429.6	27466.5	31269.4	26412.6	35335.7	60269.1	23869	50984.4	26478.1	25966.6	31766.6	24698.8	29245.1	27986.8	27339.7	27205.2	28490
298	PC(14:1/30:0)	587.005	900.726	2036.3	1646.47	1723.61	1627.4	1379.49	1768.17	1292.86	1413.54	1452.81	628.04	1137.12	761.464	1191.72	945.058	2570.1	905.131	1082.81	2213.37	2033.07	1727.92	1789.37	4124.83	1675.06	2976.47	1734.95	1131.1	1972.25	1576.75	1568.46	1496.09	1813.99	1575.6	1985.24
299	PC(2:0/24:1)	201.585	648.455	160.497	194.291	200.378	209.142	151.315	241.948	132.807	572.393	682.375	305.752	403.334	314.353	448.068	343.806	509.879	231.267	306.182	572.419	558.856	454.073	703.422	2066.99	514.396	1938.35	1941.87	473.95	1560.95	755.656	481.023	434.883	503.279	450.954	541.71
300	PC(14:1/24:4)	430.868	808.578	334370	412006	497518	571538	371784	540232	288134	359217	553438	199671	235975	186859	258655	237570	531736	205042	219291	521827	507456	438752	824499	715133	302839	720550	289371	268583	426394	301581	387676	359671	351736	344456	322136
301	PC(12:0/26:2)	473.06	814.628	1.32837e+06	1.22506e+06	1.15864e+06	1.05742e+06	1.09543e+06	944516	710829	618005	721392	301704	497105	312039	484510	456877	675887	286045	355496	605641	707005	518253	790654	1.08809e+06	438151	999350	534267	452266	723557	471237	834844	827070	833334	845785	863059
302	PC(16:0/24:4)	512.073	838.623	19923.5	16658	16884.3	16895.4	14782.3	13792.7	10267.1	22443.3	22463.7	9408.22	15818.2	10314.1	15725.1	15779.7	25927.3	9439.06	10961.5	22978.7	22378.8	19441.1	28472	42872.6	18188.5	34059	17963.8	17111.9	25085.7	17612.1	21347.4	19928.3	20366.9	20462.4	20363.4
303	PC(17:2/27:0)	587.091	898.719	8294.68	7562.05	8365.76	7677.1	6445.34	7034.5	4886.84	4347.17	4499.85	2028.42	3372.36	2438.82	3532.63	3283.83	7282.86	3241.5	3801.81	7114.31	7656.93	5912.08	9312.37	12595.7	5222.05	11713.1	5726.63	5009.39	7123.16	5214.66	7074.9	6931.35	6727.29	6393.19	6714.61
304	PC(7:0/26:2)	355.688	744.549	270789	250453	220521	220638	221140	201712	154370	182052	198907	78168.7	139905	82612.4	122616	130411	127286	49161	65799.3	119171	111479	95573.7	136159	257975	83966	171129	98886.2	86626	131605	82407.6	184182	171026	181874	174643	174886
305	PC(9:0/26:2)	405.443	772.582	1.22505e+06	1.12617e+06	1.07941e+06	1.06397e+06	1.05824e+06	977183	690538	563922	610561	261207	421886	271884	430422	400690	534263	213492	262140	464740	507236	388643	601464	854510	355349	762810	432154	363666	541209	365046	766227	758515	778025	759649	783018
306	PC(11:0/26:2)	451.084	800.611	272496	270702	276031	257433	233762	238452	157825	147822	161338	70530.5	110248	73029.4	114069	109716	160130	62368.6	79179	142564	164991	117218	181806	272452	108857	241347	124868	108729	175902	113919	195998	186525	191991	197748	191092
307	PC(14:0/24:4)	428.073	810.595	145465	156380	178046	188801	132310	164925	101388	475949	488006	263741	362479	502918	360517	356416	1.29418e+06	290760	346213	623887	657747	543023	919477	830911	319720	685969	349195	329143	467712	343243	362180	352253	365838	349919	352283
308	PC(15:0/26:2)	533.872	856.672	4032.19	3293.58	3661.69	3394.99	2837.03	3024.37	2033.82	2153.18	2523.88	1032.31	1540.62	1179.65	1792.57	1642.53	2822.17	1251.24	1416.3	2870.09	3011.37	2236.16	3769.08	5393.05	2191.54	4679.47	2752.67	2081.01	3399.17	2354.05	5109.65	3047.34	2852.07	2815.5	2950.56
309	PC(17:2/29:0)	620.805	926.748	1103.01	1379.23	1154.8	1067.36	922.461	908.795	901.114	846.825	874.761	403.338	644.437	520.721	645.719	637.251	1231.51	517.727	571.989	1115.63	1203.78	1025.34	1619.18	2238.72	900.253	2435.48	1077.61	907.35	1256.17	1040.28	1042.45	1048.4	1074.55	1005.91	1071.96
310	PC(12:0/24:4)	378.122	782.565	997550	944122	1.33138e+06	981354	841944	888226	643969	3.09654e+06	2.90949e+06	1.642e+06	2.08988e+06	1.48034e+06	2.1047e+06	2.15845e+06	3.09401e+06	1.20312e+06	1.43428e+06	2.62749e+06	3.47703e+06	2.32859e+06	3.65633e+06	3.65056e+06	1.43483e+06	3.06419e+06	1.66242e+06	1.57697e+06	2.31754e+06	1.61612e+06	2.01654e+06	1.88701e+06	1.91654e+06	1.90329e+06	1.93957e+06
311	PC(16:0/22:6)	364.274	806.566	744313	709242	754838	727873	610267	643335	428593	1.33285e+06	1.41302e+06	777665	1.26511e+06	713551	1.04746e+06	1.19692e+06	1.62493e+06	663065	771468	1.37447e+06	1.69975e+06	1.17501e+06	1.91719e+06	2.02164e+06	770915	1.85057e+06	924982	807935	1.28984e+06	894450	1.0212e+06	1.04085e+06	1.07768e+06	1.05934e+06	1.06179e+06
312	PC(16:1/26:2)	588.049	868.669	927.395	872.762	966.033	856.384	778.179	646.607	524.498	837.684	936.886	457.879	711.542	504.05	484.589	401.227	1211.02	525.436	595.082	1116.63	1150.22	989.241	1710.79	2348.28	851.556	2398.44	1190.65	1095.19	1437.12	1116.07	1071.76	1089.98	1026.73	1011.44	1004.54
313	PC(17:0/26:2)	570.025	884.704	1567.26	1471.22	1647.54	1654.9	1289.85	1434.55	969.158	911.001	972.744	477.35	646.633	520.859	671.487	630.036	1277.34	495.408	637.982	1272.76	1339.67	953.073	1732.22	5229.5	1104.78	2343.71	1246.2	963.068	1524.6	1146.79	1365.52	1244.74	1236.98	1238.91	1227.97
314	PC(8:0/24:4)	319.887	726.5	91704.8	73129.2	66683.4	57085.5	67255.8	58797.7	41392.4	47581.8	59408.3	18154.9	37988	21524.5	30799.1	34653.2	25509.5	10357.7	13532	22312.7	22873.8	17697.4	26220.5	68210.4	26847.3	66176.3	36500	30928.7	45313.9	29700.4	54800.6	54782.4	56189.5	58387.3	58314.3
315	PC(17:2/26:2)	608.624	880.672	279.5	270.429	276.263	285.634	206.135	211.355	104.611	220.743	259.056	139.393	180.653	129.942	156.828	149.504	271.751	154.861	136.237	240.924	288.238	243.221	351.364	527.753	233.349	548.573	232.185	208.934	262.571	244.324	255.639	214.94	265.232	220.211	255.886
316	PC(14:0/20:3)	349.057	756.55	385923	336363	292937	282019	325000	269362	208866	525504	565879	228755	415096	242687	357612	374338	427070	142963	198307	351922	331797	291355	1.03884e+06	756852	336929	1.44207e+06	363388	364011	516578	313384	508040	854058	484681	435174	453062
317	PC(14:1/22:2)	426.319	784.569	53821	62541.3	78566	89775.9	58020.3	86995.4	44555.7	95473.1	102700	61881.6	65991.2	59759.7	79331.1	65911.7	125287	58942.5	56253.5	143292	142095	111057	204465	218351	97074.9	233226	97208.7	86446.5	134668	99906.5	76739.9	80587.8	79560.1	81684.9	75950.1
318	PC(15:0/22:5)	422.897	794.555	24879.1	18439.2	29819.9	35338.6	30179.1	35143.8	21944.6	44806.3	51364.8	24625.7	20286.2	21266.8	34980.3	18503.9	42196.8	17158.4	19076.7	35733	33635.1	32847.4	42211.6	84356.3	40658.6	82739.1	40313	32985.4	44038.3	29798.8	38793.8	41113.8	29897.5	26696.4	37278.8
319	PC(16:1/22:2)	472.252	812.601	9499.39	15391.5	9358.81	6727.78	5231.87	5491.15	8083.14	49695	54062.5	30812.5	44106.7	28789.1	41791.8	42144.8	122323	41380.4	41336.2	77597.4	101507	81759.7	134527	101702	58697.5	105645	62431.4	54502.7	67272	59994	36433.5	38319.5	39721.3	30158.3	36692.2
320	PC(18:1/22:6)	383.43	832.573	24690.1	25128	25200.5	29581	22505.5	23850.1	16103.8	23788.2	26011.5	14820.8	18385.6	13482.1	20936.6	17770.9	40748.5	15834	18556.9	36971.1	42438.3	33377.4	60243.5	45818	17523.1	41329.4	20126.9	15595.9	27871.1	23935.7	23508.1	22637.2	22146.7	24060.4	23529.8
321	PC(18:3/24:4)	509.399	860.635	3226.27	2124.01	1897.71	1937.91	2093.47	1914.36	1344.57	1946.31	2138.61	855.696	1264.1	928.435	1359.42	1326.63	3120.96	738.819	1052.91	1652.48	1793.33	1489.03	2509.33	3960.84	2314.73	3643.83	1601.99	1725.62	2375.64	1302.28	1923.58	2346.77	2192.94	1316.43	2278.92
322	PC(18:3/28:0)	587.14	924.733	1212.7	1103.03	1271.76	1405.53	949.785	1102.52	706.448	708.312	782.278	426.433	575.186	409.51	543.137	603.809	1164.49	452.385	536.108	945.685	1101.88	927.187	1396.49	1786.16	765.752	1804.18	820.338	773.655	1070.91	884.667	977.873	938.826	932.048	954.771	1018.6
323	PC(17:2/34:0)	640.822	996.844	548.975	503.239	523.939	504.373	518.855	493.911	324.606	761.064	667.055	315.398	428.402	335.551	446.183	470.606	667.041	273.247	300.829	690.926	650.614	619.697	944.769	1281.85	540.62	1204.77	569.117	545.18	868.041	635.354	649.733	611.16	613.074	587.592	575.605
324	PC(16:0/20:4)	354.965	782.564	275851	159725	204990	139207	144239	134649	103877	264374	201228	180982	282193	187126	199566	265410	353167	143780	175395	237162	228153	196440	405630	221120	90855.6	181683	106088	98628.5	149244	96465.8	251798	299631	301942	310756	221464
325	PC(18:1/22:5)	399.173	834.594	78207.1	66733.3	70282.1	65114	57718.7	58549.1	40010.4	58948.2	62600.1	29270.1	43296.6	28157.9	43223	44137.1	79460.3	31208.9	39548.5	64773.3	74690.7	56818.6	86430.1	142487	54221	127504	69451.5	58538.5	91055.3	59598.9	72039.3	69863.9	74690.3	73460.6	70427.8
326	PC(13:0/20:3)	360.101	742.528	26818.9	31959.7	32050.6	33645.9	26432.9	36667.6	20729.8	56135.5	63395	19880.1	26320.6	20375	35184.7	26594.6	39349.7	21693.1	15004.7	34550.9	27927.4	44439.3	42500.2	60343.2	26429.9	52012.7	24762	23479.7	36558.3	37573.3	36538.2	33440.2	29597.2	30946	30460.6
327	PC(14:1/26:2)	513.13	840.631	10860.1	9260.29	4912.73	8655.23	3515.34	3445.37	1768.11	5031.23	5616.14	2656.53	3972.85	2516.92	4245.54	4050.35	6279.06	2543.73	4265.28	5626.09	5887.83	4878.29	11107	10100.2	3989.21	11783.4	4371.21	5179.39	6577.44	4448.47	5095.46	4780.43	4725.36	5447.07	5201.43
328	PC(16:1/22:5)	347.539	806.565	286764	259497	230044	227267	214775	188323	150233	271237	268979	127271	202864	124391	187332	204902	309579	105210	155634	245967	239379	213762	307128	293967	124387	229302	140784	135015	187856	127575	255867	255528	257080	255723	250086
329	PC(10:0/17:0)	281.438	664.488	538.998	438.241	468.9	523.17	365.816	458.569	266.53	537.174	580.19	305.042	357.514	258.512	455.133	260.126	708.177	291.98	200.85	654.72	764.966	573.476	956.628	1522.4	511.959	1651.74	455.88	457.643	829.109	586.879	452.003	543.779	493.948	498.959	462.868
330	PC(2:0/16:1)	93.876	536.33	187.869	249.016	260.582	467.249	173.435	422.529	166.198	577.372	433.676	167.795	319.109	265.454	239.045	322.397	546.137	362.879	379.832	2266.34	1194.7	1064.5	1680.65	1346.36	647.998	708.361	333.066	244.757	889.015	506.941	564.983	558.079	516.347	436.217	523.911
331	PC(18:3/22:1)	453.454	838.625	43839.1	51844.3	53283.2	50770.7	43308.6	41629.8	24953	32188.2	34320.4	15710	45583.4	15962.1	62047	57894.9	43010.5	39925.9	20153.3	84843.2	92810.2	75380.2	113252	158182	25743.6	93658.9	52057.9	64523.4	92867.2	25875.4	63960.3	59216.4	61574.2	63944.8	61129.6
332	PC(14:1/22:6)	301.096	776.514	1310.88	1187.19	1084.76	1008.79	1224.92	1081.25	869.774	1381.12	1817.05	615.108	1529.38	650.566	981.887	1112.3	1224.1	320.187	445.708	896.617	1087.52	672.038	1036.06	1537.38	796.779	1467.53	1084.35	747.251	1267.64	682.958	1415.07	1177.43	1426.85	1204.08	1508.02
333	PC(16:1/20:2)	377.286	784.571	114228	118077	126397	124535	104594	111233	74893.9	327975	320725	183465	244513	170420	235606	242781	353312	142901	168151	315170	346689	266177	433935	452567	167486	382232	191331	193505	284481	193157	247437	224994	222810	216991	225855
334	PC(17:2/24:4)	460.137	848.609	4565.59	5293.43	5413.75	6763.22	4008.49	4614.93	2996.89	4327	4807.15	1692.3	3024.64	2400.89	3089.19	2674.38	4134.95	2033.78	2255.54	3659.72	5373.98	3574.72	5544.1	7292.72	2830.63	7547.05	3641.14	2712.72	4991.96	3490.84	4437.86	4368.9	4884.91	4766.28	2217.93
335	PC(10:0/20:3)	311.398	700.484	44805.9	35412.8	34858.1	31422.4	32850.7	27687.4	20886.7	13807.8	16278.8	5809.21	11586.5	7206.04	10383.9	10782.4	9285.45	3957.51	5108.42	9080.36	7687.08	6567.61	9769.25	34066.7	12359.5	32572	16967.9	13223.5	19422.5	14242.2	23801.7	24781.7	23313.8	25764.4	26557.7
336	PC(16:0/26:2)	551.609	870.689	36394	32990.9	31932.7	31538.7	27557.6	27327.6	19162.3	20382.5	20611.8	9160.8	15842.3	10221.9	16442.4	15884.9	33725.6	13467	17290.9	29924.2	29996.2	26808.5	39287.7	58529.2	22969	52070.5	27349.3	24024.6	33565.7	23424.9	32854.7	31501.3	31466.2	30022.6	30945.3
337	PC(17:0/17:2)	341.635	758.555	82007.8	71008.1	28978.1	27367.4	25557.8	61600.4	39614.6	119108	130670	51850.8	90209.9	56094.8	84124.1	88628.1	43029.4	36827.2	47537.6	86185.5	39090.3	33105.2	40297.3	182073	73732.5	155323	45372.3	80388.7	49886.6	30425.3	45753.7	29322.6	44208.4	42884.3	43306.8
338	TG(16:0/16:1/18:3)	661.091	844.732	4079.66	2348.95	2517.52	3429.51	1888.99	1726.51	1130.32	20522.3	22516.2	10246.6	13827.1	9790.23	13954	19965.9	15430.1	4316.04	5076.67	9675.83	14225.2	7499.99	12615.3	12210.5	18032.2	19326.1	7303.24	6363.59	10951.4	20509.3	9338.62	9236.23	9360.71	9189.5	9612.74
339	PC(19:0/22:6)	513.131	848.636	10275.3	9775.95	10725.8	8972.04	9353.47	10100.1	6121.57	11069.8	14010.4	5863.19	6590.07	5999.24	6904.85	9318.93	10256.8	4620.82	6359.75	9267.08	14949.3	11375.5	16931.6	17854	6968.89	13041.2	6021.55	7679.7	7202.58	9558.43	12740.8	9970.6	7900.54	10745.9	10161.8
340	PC(17:0/18:0)	448.44	776.601	42447	36274	40360.8	32205.5	33291.6	30594.8	35296.8	69438.2	74555.9	34378.3	51637.2	38057.2	58662	52200.3	77274.7	33563.2	40555.7	73240.9	51551	60680.4	62339	70662.5	48010.5	114609	59792.4	47122.9	47632.6	34059	45452.1	45879.6	39995.5	79222.6	80526.3
341	PC(18:4/20:5)	308.692	800.515	2250.15	1753.97	1696.8	1760.17	1563.68	1458.32	1074.07	1473.74	1604.03	731.423	1007.24	695.542	992.07	989.382	1203.59	466.166	611.592	848.624	905.697	934.059	1304.37	1991.79	739.954	1657.36	862.895	861.061	1397.36	923.961	1371.28	1428.95	1351.9	1675.62	1513.65
342	PC(21:0/22:6)	549.629	876.66	1792.96	1612.77	1649.98	1462.12	1339.91	2080.82	939.217	2041.21	1583.84	916.78	1480.03	1012.47	1291.01	1228.34	1749.1	887.664	812.919	1678.33	2000.3	1592.35	2165.33	3015.57	1353.29	3009.68	1388.33	1139.68	1813.03	1417.82	1632.94	2230.22	1594.89	1685.55	1933
343	PC(20:1/22:6)	460.704	860.605	3936.02	3844.58	4789.01	15130.3	9861.49	7677.89	2821.19	7308.1	7556.65	8968.02	5382.76	4554.75	6171.48	5322.93	18585.3	9953.22	5520.92	16210.2	24345.9	15313.5	12884.9	18185.9	6091.66	13283.8	6522.12	5609.49	8387.46	8006.5	6215.73	6271.03	6682.92	16192.4	15895.2
344	PC(17:2/22:6)	356.286	816.564	5576.85	5173.76	5056.18	4475.74	4044.74	3643.65	2531.76	4958.8	5393.77	2111.13	3883.31	2434.84	3402.37	2913.5	4567.97	1782.74	3653.85	5918.28	3013.52	3043.4	5687.97	35832	16755.3	34918.5	28781.4	15454.9	21214.9	18369.5	10069	9173.76	9331.11	9034.97	9189.2
345	PC(22:6/23:0)	620.689	904.66	1527.51	961.321	728.69	951.067	1214.77	596.713	551.492	3063.6	2490.41	1418.32	1942.83	1457.3	2284.48	2399.42	1213.68	603.385	653.515	627.585	896.152	1246.91	1984.81	5458.99	1639.47	4724.75	2288.95	2182.79	3358.27	2746.04	1939.71	1830.74	1896.78	1706.32	1623.01
346	PC(18:2/18:2)	342.311	782.557	60249.4	51846.5	46678.3	48878.1	47104.6	40388.8	32469.1	393544	137436	63274.6	107019	65716.3	99131	107547	125582	40557.1	58522.3	101946	15887.5	86677.3	111116	143122	55151.7	114685	68276.9	63987.1	89958.4	56669.4	96632.3	93510.2	15273.4	94011	304593
347	LPC(34:0/0:0)	501.137	770.599	119963	99200.2	104762	90934.7	92087.1	65251.6	51613.3	70221.2	83794.5	35594.7	57039.5	34437.9	47477.4	54066.4	67712.7	30568.5	34145.8	59325	74434.7	57319.6	87077.6	112460	48281.6	97219.1	55372.6	55106.3	67497	56568.2	93053.9	87254.2	92805.3	89507.8	86073.7
348	PE(O-18:2/22:6)	416.919	774.527	13004.3	15636.4	16528.3	19126.9	14912.2	16983.7	10279.9	22751.8	24265.7	12210.4	16789.9	13925.8	17120	15896.2	35398.4	15032.6	15139.3	34457.1	34742.3	10261.2	52195.8	50923.4	22300.5	49686.6	22262.6	20144.5	29172.3	26139.6	21662.1	20074.7	19047.8	18417.9	16941.9
349	PS(16:0/17:1)	326.935	748.507	9088.85	5916.95	4619.82	5266.88	6098.57	6278.99	3872	7018.28	6649.38	2750.85	5211.88	3056.72	5133.65	4865.26	4431.55	1388.57	1974.72	4056	3543.24	2926.26	4890.28	11700.8	3191.14	9258.79	5264.38	2235.79	3966.22	3614.35	5975.05	6063.14	6448.8	5900.24	5812.83
350	LPC(32:0/0:0)	452.825	742.568	291293	311452	367818	382581	298759	361020	200592	716663	765480	416146	470966	367106	489735	472523	922643	413170	414296	865875	1.01479e+06	839540	1.36336e+06	1.32214e+06	630608	1.30033e+06	612363	579589	814730	667180	591101	555771	532589	525257	508964
351	PE(P-18:0/20:1)	534.709	780.582	9277.2	8729.12	8061.82	7758.6	8064.92	7794.27	5092.42	9805.37	10925.7	4402	6982.72	4828.79	6429.18	6984.2	7961.71	3478.65	3802.45	6997.87	8705	6659.74	10163	18976.9	8121.96	17456.8	8824.62	7775.24	11306	8707.71	9940.79	9474.23	9391.73	9377.09	9304.27
352	PS(18:1/20:1)	401.509	816.57	88515.1	71898	71190.7	70666.4	60598.3	72750.1	43895.5	51856.9	53034.9	24965	36700.9	24726.2	41287.3	34383.9	43662.8	16423.9	21416.7	38458	33966.6	30925.3	46082.5	69022.5	29351.6	61668.1	32426.4	30463.3	42926	28997.1	56057.5	57759.2	52737.8	51003.1	52068.5
353	PG(10:0/26:1)	425.587	799.539	19909.4	22489	30970.7	38491.1	21611.9	32083.4	22088.6	36413.8	33005.1	22912.3	35232.8	30908	27344.7	34642.6	56476.1	19682.3	20797	51840.8	49855.5	43891.6	81217.7	103973	45096.8	79090.2	37754.9	42244.1	67540.3	37874.6	33025.3	31122.2	30613.8	22632.2	25380.6
354	PS(22:6/18:0)	343.623	836.538	96935.6	87352.4	78797.5	88647.3	76280.1	68329.2	55916.8	76699.4	71648	30029	53897.9	34397.9	57544.7	52743.8	86733.9	25283.9	36311.8	71963.5	46822.7	55769.5	70818.6	194598	82459.5	174612	90848.2	84375.3	116280	81640.4	102193	91150.9	87592.5	89896.7	86317.1
355	LacCer(d18:1/24:1)	491.068	972.729	17057.9	13685.8	15108.8	14135.5	12591.8	7296.29	7935.98	16984	19265.2	7710.14	11086.5	7652.37	5469.13	11445	15674.5	6642.94	7380.67	14104.3	14906.1	12991	17725.7	23213.4	9687.1	17587.3	9640.97	10176.4	13128.2	9709.85	15199.4	14686.4	15333.1	15242.7	15222.7
356	PS(18:1/18:1)	362.8	788.538	313804	308298	155707	125418	243267	161734	77806.1	293765	294192	116923	83137.5	145369	206728	103789	96407.1	75368.5	123136	110851	151561	146590	230635	374149	172253	323991	102074	94310.4	282801	160897	117721	103390	104164	126923	96994.9
357	GlcCer(d18:1/20:0)	474.864	756.628	11464.9	10513.1	11390.6	10627.3	9438.62	9294.53	6335.12	7704.28	11620.1	4811.91	6357.1	3744.99	4548.72	6416.39	5638.91	2220.41	2416.06	4078.48	7135.14	4676.55	8453.12	24270	7455.88	3615.79	9798.85	9516.35	13747.2	2307.46	4334.63	4957.03	5397.22	4910.69	5514.18
358	PC(30:0/2:0)	417.713	756.547	263976	293834	402909	409140	280412	369731	215148	536268	562980	340020	351282	317624	423961	373698	802211	342613	340661	831409	906906	719640	1.35114e+06	1.3187e+06	592131	1.41192e+06	582062	469582	767484	621721	491011	467062	451365	434766	425881
359	DG(16:0/26:1/0:0)	637.039	724.675	2614.8	2270.88	2061.24	1815.34	1828.18	1505.02	1510.01	1563.58	1605.39	725.092	1420.1	1056.24	1382.99	1462.84	3181.58	1520.97	1891.85	3027.63	2771.85	2803.28	3545.63	5770.84	2262.32	5805.91	2975.84	2158.05	3094.01	2504.41	2817.93	2795.96	2575.71	2810.67	2827.87
360	PC(P-16:0/18:0)	458.098	768.584	528151	627459	683022	709449	545991	646418	375622	635705	689599	360096	487238	368034	522051	425091	768999	335240	363275	775144	818250	669939	1.11088e+06	1.19028e+06	520982	1.1818e+06	551355	444585	747663	534073	592638	569614	545571	548697	547976
361	PC(P-16:0/20:0)	504.038	796.615	127943	130569	132106	113517	98069.6	97379.8	67300.2	101819	111743	48585.2	77720.6	51345.5	74253.8	73676	95738.8	39945.1	46626.5	86283.7	94670.7	72844.5	111159	164457	70294.9	143145	78729.2	71099.9	99471.2	74320.7	111937	106679	110795	107182	104920
362	LPC(30:0/0:0)	383.241	714.537	12999.8	14558.7	15175.8	13274.9	11059.1	11648.5	7649.67	10712.3	11203.7	5291.93	7837.35	5354.19	8289.88	7837.17	11105.9	4145.72	4835.51	9793.09	11355.6	8475.48	14741.7	19782	8923.89	20449.9	10806.2	8123.99	12548.9	8535.5	13086.3	10597.7	11180.7	10770.3	11453
363	DG(18:1/24:1/0:0)	654.658	722.66	312.827	251.777	300.686	304.83	276.266	305.954	188.711	653.552	1197.97	593.811	439.862	387.476	278.513	444.517	594.354	253.018	288.54	514.973	556.542	552.495	850.863	2051.39	1221.68	1762.99	674.446	629.192	1381.27	949.6	533.9	529.059	622.166	583.768	859.562
364	PC(2:0/30:0)	456.529	734.563	60394.8	53202.8	55946.7	55778.1	50689.6	42718.1	33862	256649	325129	135772	182704	151181	207174	215300	372265	210463	198601	379988	424708	333195	447837	699038	292705	580712	308600	364958	416483	301819	250398	271168	297005	275946	284786
365	PC(5:0/27:0)	399.2	734.557	233985	228255	235190	233002	219621	201129	150425	416915	434059	235588	339887	246467	319956	325406	404457	177759	200848	410790	414271	355080	472452	755531	281735	674538	332173	315582	479782	326163	426102	327077	345400	379526	362615
366	PC(2:0/15:1)	67.311	522.315	786.586	943.436	632.431	850.567	836.18	1069.22	375.996	1039.1	1110.19	645.889	510.937	386.909	307.141	364.295	1320.05	486.647	427.578	1660.85	1534.13	1104.05	2167.2	867.262	675.378	990.194	656.526	572.074	894.048	522.167	1376.24	1251.71	1193.84	1260.56	1051.92
367	LPC(28:0/0:0)	348.293	686.503	7544.62	8179.43	8611.3	8413.53	7472.01	7218.77	4744.49	7367.37	8017.96	3903.44	5289.2	3852.8	5651.48	5211.71	7518.4	3176.65	3827.87	7543.15	6060.51	6133.4	8012.57	16562.2	6049.48	12957.9	7674.29	6384.05	8880.25	6515.84	8000.14	8568.88	7811.4	7508.29	7292.63
368	PC(P-16:0/22:0)	545.253	824.645	17719.1	14327.1	14521.7	12306.1	12454.5	9608.26	7094.52	7452.35	21878	4649.45	7389.67	4706.43	6839.77	6970.72	9655.26	6834.43	5110.26	8200.23	13952.2	7722.64	18891.4	12018.4	11517	14374	6747.73	5051.58	9079.58	5980.36	19706.2	18269.2	9776.05	10060.3	10470.1
369	DG(16:1/18:1/0:0)	481.629	610.538	126801	125948	94067	101534	113295	113240	73680.5	195427	235667	69201.8	134454	82917.6	98809.8	107424	210490	105585	113117	185040	211928	175564	273613	364343	171707	302833	191331	130414	261664	158967	173611	177512	173444	177514	186821
370	PS(25:0/17:1)	524.679	874.65	8103.87	7323.04	6274.57	8428.14	6937.42	6018.37	5066.41	4245.88	3986.08	1796.19	5271.85	2000.11	3027.56	3154.25	5982.19	1937.63	5966.78	4679.67	4381.79	6608.69	6108.16	10859.4	4330.47	11695	5226.79	4662.69	6349.04	5597.07	6788.92	6486.07	6382.8	6455.24	6492.06
371	PS(26:2/18:3)	484.082	894.613	4312.23	4102.43	3993.93	4463.67	3636.39	3638.45	2260.68	2361.64	2365.47	1098.07	1691.46	1195.36	1847.9	1680.91	2654.88	1053.13	1300.07	2512.95	2305.82	2167.38	3194.59	5068.46	2065.99	4607.7	1836.14	2024.05	2596.95	2155.65	3158.16	2923.15	2996.93	3017.47	2650.49
372	PS(26:2/18:1)	505.968	898.637	2269.91	2161.74	2827.36	2456.97	2164.15	2185.8	1357.6	1854.23	2461.14	1083.97	1282.78	1033.42	1484.22	1258.19	1930.26	680.862	779.445	1551.26	1469.54	1462.54	2435.6	3606.85	1751.24	2810.95	1264.38	1025.48	3157.19	1530.36	1969.44	1896.62	1215.58	2194.3	1745.07
373	PS(22:0/16:1)	459.838	818.595	21356.3	19397.5	23058.7	23030.3	17120.1	17289.6	11904.7	25672.4	22097.5	13489.7	16678	12494.4	18386.5	17243	22810.3	10832.1	11868.7	20964.3	24335.8	18611.1	36454.3	34869	15308.3	32870.7	16253.1	14480.5	21156	16083.7	21910.8	19371.7	20680	19912.4	18521.4
374	PS(23:0/17:1)	483.199	846.622	22827.4	19398.6	18236.1	17379	18863.2	13823.1	11911.7	16569.5	17839.9	7914	12340.3	8432	13317.4	12492.4	19020.9	7117.38	8112.78	15013.2	15131.4	13692.4	20042.5	33234.7	14403.5	30139.4	16061	14425	19889.6	14923.6	20949.7	19975.2	19165.4	19268.2	18776.8
375	PS(22:0/17:2)	428.094	830.585	10927.5	10046.5	14281.6	11925	6448.16	7854.9	6648.27	7570.42	7620.09	3374.43	5393.34	4732.69	5116.41	6042.27	6799.69	2615.04	3337.42	7516.78	6073.9	5458.56	8365.77	19048.6	6466.86	13562.9	8340.43	9180.75	8839.56	5100.69	7876.05	8494.51	7578.43	7922.3	8263.82
376	PS(23:0/17:2)	450.2	844.602	59958.3	50574.3	45425	46965.4	48142.9	44378.1	33262.7	49285	54096.2	21201.8	37251.4	23121.5	35726.2	21068.3	47526.2	19996	21124.4	38154	39700.4	36423.2	49263.5	50026.4	35838.7	71581.9	42078.4	31889.8	43060.2	36975.9	42275.7	38126	36650.2	39465.2	34306.3
377	PS(22:4/16:1)	360.781	810.524	25917.5	27687.6	28282.7	30463.5	19049.1	26948.5	17336.3	22233.2	19154	8752.96	16679.9	9280.51	13704.3	14613.5	23340.4	6787.63	10106.6	15373.8	14627	17855.9	21169.7	28336.9	11681.4	25843.5	12062.8	10093.4	17495.8	13527.9	17385.1	23520.2	17143.1	20975	17240
378	PS(22:1/16:1)	413.33	816.577	74745.7	85526.2	80107	84534.5	71562.1	72877.7	50333.4	86934.2	79543.5	43178.1	65535.6	33941.5	63437.2	44018.2	101554	30820.3	32682.5	71777.9	77903.8	61148.9	132335	116307	49621.6	87918.6	52909.8	49224.6	73535.4	51534.7	94854.4	54765.1	56695.8	51029.9	74378.4
379	PS(25:0/17:0)	532.958	876.675	2279.29	2437.99	2254.32	2169	6443.89	2060.96	1261.29	3231.78	3258.22	1295.52	2394.88	1658.5	2287.94	2187.13	2854.17	1328.26	1272.65	2454.72	3132.66	2098.2	3502.58	4038.46	1877.53	3947.7	2161.58	1781.11	3237.64	2265.93	2696.39	2465.42	8607.09	2709.2	3029.45
380	PS(24:0/18:3)	491.428	870.626	4314.09	3810.18	3658.79	3155.92	3250.89	2690.19	2129.95	3658.84	3795.96	1678.1	2658.47	1748.19	2390.46	2489.65	3016.74	1096.86	1283.62	2424.95	2752.77	2168.3	3628.04	5339.55	2255.82	4764.45	2563.75	2484.61	3515.85	2371.9	3731.39	3386.5	3349	3291.6	3624.3
381	PS(24:4/16:0)	436.832	840.58	5517.92	5699.7	6070.92	6974.76	4790.52	5496.28	3252.4	7304.55	6784.21	3823.28	4959.74	3723.72	4889.44	4734.77	6340.84	2672.46	3200.01	5578.92	6600.81	4457.21	8802.8	11200.4	4485.01	10939.4	4792	4568.6	6291.97	5346.11	5881.45	5660.21	5563.6	5934.2	5747.63
382	PS(24:1/18:4)	447.543	866.58	6424.89	7280.91	7941.6	12758.8	6037.55	7916.35	7133.43	11215.2	4551.31	2770.54	3429.05	2818.85	4269.55	3593.6	6454.94	1903.16	2967.44	5302.18	4581.69	4431.95	6564.89	9251.69	3741	8467.09	4575.4	3738.14	5689.7	4179.86	5712.89	6249.25	3950.61	5520.64	5537.33
383	PS(23:0/17:0)	491.586	848.646	12786.8	11457.8	10919.3	10443.6	11274.2	8242.05	7681.18	12327	13823.4	5756.48	11002.8	5283.97	10875	10919.6	10641.3	4396.64	5081.04	8716.06	10133	8411.6	11719.8	25580.9	8261.14	16546.4	9079.45	8661.39	11171.2	8129.49	11447.4	10658.9	10981.6	12008.8	11455.3
384	PS(21:0/15:1)	398.5	790.556	1.27893e+06	1.05176e+06	982508	1.10383e+06	1.01072e+06	935777	658932	747791	700570	311397	531088	345944	586616	519049	670868	224649	289402	584611	386755	476312	589751	1.24819e+06	521756	1.03682e+06	583187	544760	706627	516963	912236	839443	797429	778200	799959
385	PS(24:4/16:1)	358.454	838.553	65659.1	59189.3	52993.5	58567.9	45106.6	58675.4	37280.6	60350.4	57866.4	28204.5	46664.5	31227.4	47189.3	44780.3	59238	18624	24695.2	43782.4	28506	36385	68845.2	122879	54811.9	103290	58928.8	54674	71974.7	52487.3	66242.4	62772.1	64721.6	61475.9	62198.6
386	PS(22:4/16:0)	356.365	812.538	35299.3	33395.9	30071.2	34559.4	59408.2	28660.3	22359.6	66674.7	67063.5	28031.6	46413.1	31748.8	47898.8	47992.8	47311.1	15185.6	22350.3	40681.9	27718.9	36087.8	43531.2	102921	42650.6	84636	46865.2	39536.3	57678.1	42648.9	53647.7	52012.2	50001.4	47543.9	45636.1
387	PS(21:0/15:0)	451.957	792.582	45948	58012.6	64710.4	65606.1	46879.2	57755.1	34491.9	46284.3	48063.2	24921.1	32688.6	24797.9	40895.6	33887.5	54823.2	26253.3	24197.9	46016.5	54279	37276.7	73883.5	71734	28277.9	75465.4	33566.6	28084.4	44598.7	31776.8	46580.8	44880.2	42355.8	54637.6	41225.2
388	PS(22:2/16:1)	397.423	814.565	36124	42662.4	50490.9	50407.3	34135	44154.8	25645.8	79449.1	74415.5	47213.8	50117.2	42359.3	52664	48412.4	75594.5	30900	33630.9	62345.3	74765	58815.2	92013.8	88931.4	111474	87791.7	37331.7	34790.9	56174.8	130202	50553.4	52790.6	47253	47644.6	44147.6
389	PS(24:4/18:4)	339.316	860.528	21324.3	20352.5	20453.3	21117.9	18430.1	19605.2	13220	58356.7	63259.3	27651.6	43198.9	28347.8	43863.1	42515.9	59644.4	22293.7	27504.9	61662.9	46250	44290.7	61468.6	115811	49601.8	118175	57852.7	54942.7	71750.1	51805	46804.4	44151	44773.6	45329.4	45770.2
390	DG(18:0/18:1/0:0)	552.227	640.583	80209.4	75474	54757.5	57789.9	64003.9	53420	38856.5	95274.5	100366	36412	65859.1	43094.4	63937.1	61422.3	171568	71244	77142.6	153242	155200	132522	190693	199530	86932.3	146225	84259.9	70457.4	113700	76609.7	103414	99945.9	98074.6	105560	103861
391	DG(17:0/18:1/0:0)	516.243	626.569	1110.96	1142.01	994.184	1315.14	988.805	1433.03	958.242	2155.66	1754.35	734.268	1013.28	855.429	1075.73	1160.65	2851.42	871.542	1003.14	2268.23	2302.78	2100.19	3080.26	3267.31	1823.49	2893.77	1255.37	1224.95	1886.21	1389.76	2028.56	1420.52	1354.22	1331.55	1154
392	PS(26:0/18:2)	547.795	900.661	1928.9	1936.84	2280.29	1776.2	1515.31	1684.64	1019.34	1791.54	1468.87	940.4	1695.25	1022.71	1212.47	1053.4	2069.61	751.774	890.446	1702.01	1120.86	1116.39	2407.65	3127.21	1348.34	3022.04	1225.23	1321.99	1910.43	1479.98	1845.8	2053.7	1904.58	1676.09	1800.42
393	PE(17:1/17:1)	339.017	716.511	6064.93	4029.85	5445.54	4873.42	5608.74	5658.16	3874.28	5042.71	5921.37	2412.88	4077.55	2738.23	3891.44	4583.65	1898.05	2303.49	2461.79	6265	4548.72	12692.6	5603.05	30698.3	5232.9	22814.7	6774.63	5928.3	8076.77	5785.3	15907.7	7249.91	7336.11	6797.31	6721.47
394	PE(P-16:0/20:5)	377.785	722.507	385161	370346	377243	383017	329431	353308	236496	627549	605785	323446	440036	289940	496647	417731	486488	187677	209261	375893	484922	378570	606276	1.0447e+06	433128	954114	484041	454614	706807	476260	526445	499057	500400	491494	479531
395	PS(20:0/15:1)	376.387	776.538	63076.8	48281.6	85481	52349.2	48178.7	51400.2	32665.6	33278.6	37516.3	17229.8	24236.4	17360.1	29173	23724	33509.8	14539.1	15489.5	30480.1	26692	23761.3	39867.4	69787.4	25467.3	61674.4	32414.3	27521.3	42103.8	27105.3	44340.6	55650	39495.8	37337.5	40439.4
396	PS(22:2/14:0)	401.779	788.55	24980.1	27993	33166.2	77254.6	24832.2	30842.9	18951.6	52912.8	53473.2	33155.4	36332.2	27453	36728.6	35365.9	46380.1	19259.5	20505.3	35417.4	46732.4	31526.9	112600	61780.1	14284.2	43475.1	16904.5	25583.6	25470.2	21206.6	27580.2	34331	36075.7	32875.2	69924.6
397	PS(20:1/14:0)	350.871	762.525	607647	521459	430736	480579	494396	427359	324593	770799	747435	290218	525231	346559	518520	502624	351268	119545	163280	303797	185949	244240	289621	839165	359213	745745	419210	359967	535879	336657	607213	559416	545929	537537	513164
398	PS(22:0/18:3)	445.46	842.596	13768.3	14424.7	16372	11193.4	10976.8	13746.5	8374.7	14703	17434.7	9712.14	12442.3	7004.05	11878.2	12130.1	11043.7	4886.16	7593.14	10110.9	13577.7	8564.73	12995.5	22944.6	9401.66	15064.3	11261.8	24215.7	13301	7896.56	10945.8	10574.2	11820.5	13952.4	12601.4
399	PS(22:4/14:0)	350.469	784.505	16032.2	14378.3	14554	15517	14723.4	14660.5	9619.07	20790.4	22299.8	9446.77	15135.1	10164	14930	13905	11325.2	4700.51	5540.99	10777.7	8387.31	8947.15	11353	27821.8	12435.3	26941.1	12952.2	11415.5	18215.2	12415.6	15323.7	15393.4	14650.7	14537.9	14848.5
400	PS(22:4/18:3)	333.043	834.513	2785.88	2118.73	2329.09	2371.3	2751.11	2310.83	1960.51	26313.9	31523.9	14561.9	21861.7	14399.3	24111.9	24766.2	33569.2	12144.7	18422.2	35586.3	27087.4	25463.5	32954.4	62537.1	25258.8	63869.5	39370.9	41209.1	41446.4	28106.3	28952.2	28133.3	27658	26858.2	27198.2
401	PS(20:3/14:1)	298.742	756.473	1925.35	1816.98	1972.7	1858.26	1842.25	1950.57	1326.27	4746.85	5169.04	2021.81	3189	2299.84	3076.99	3071.95	2119.27	793.857	1059.46	1924.08	1460.29	1626.1	2282.61	5709.78	2588.98	5398.89	2873.72	2341.59	3559.74	2406.65	3206.81	2849.74	3043.87	2852.91	3029.04
402	PS(22:2/14:1)	366.191	786.536	8855.69	9498.75	11685.1	7277.36	8535.21	6054.04	3401.83	13881	14791.5	5638.04	6321.77	3985.97	6856.99	11007.3	8303.75	7348.88	2796.92	17389.1	7771.68	15721	22500.6	29625.7	4417.92	8250.01	13230.2	11752.6	6021.81	5125.36	15006.5	12359.1	12403.7	12432	6761.15
403	PS(20:0/14:1)	414.007	762.537	15401.2	15315.6	15602.4	22288.7	12934	12795.9	9204.18	18365.8	21113.3	9584.52	14610	11232.1	15752.8	14723.5	17580.4	6834.96	7817.47	14079.5	17769.1	10923.7	19119.8	45478.3	11539.5	28262.4	15407.7	13459	23564.5	12428.3	16459.1	15081.1	16847.7	16876.3	18180.9
404	PS(22:4/20:5)	343.181	858.52	4040	3993.36	3608.41	4323.48	3609.26	3709.28	2446.1	3666.42	3723.94	1533.29	2663.51	1880.1	3251.36	2636.75	4573.12	1651.39	2070.69	3723.08	2884.18	3155.02	4426.69	9183.18	4247.65	10379	4929.29	4935.29	6209.23	4435.93	4796.98	4699.57	4081.7	4519.08	4133.54
405	PS(22:1/18:2)	415.505	842.587	18693.2	19496.8	18778.7	18957.7	25112.6	20719.7	12400.6	9914.41	11310.7	5611.5	7347.77	10716.8	7504.03	7782.24	9237.89	4212.49	4738.23	9150.17	8004.08	7011.34	12210.1	16978	6567.07	33090.7	8195.29	6236.53	9746.35	6892.93	12443.6	11718.5	10122.5	24105.6	11651.3
406	PS(20:4/16:1)	268.171	782.49	410.171	363.877	427.07	419.665	366.561	466.768	266.312	831.595	781.948	348.716	546.182	417.675	540.35	497.307	726.314	255.152	253.15	698.979	522.007	501.101	849.482	1399.16	521.336	1248.59	519.901	459.298	818.095	503.822	599.483	616.677	541.351	640.46	583.46
407	PS(22:4/20:4)	294.799	860.529	2382.19	2633.41	1993.33	2043.52	1764.85	1526.14	1213.02	8556.1	8360.87	3955.85	6411.03	3904.73	7746.5	6446.55	4060.69	1406.27	2055.07	3949.08	2703.63	3475.67	3876.13	10523.6	4234.31	8124.13	4804.33	4915.66	5958.22	4597.94	5034.69	5003.97	4837.69	4758.81	4722.99
408	PC(26:1/5:0)	349.31	740.524	114114	84452.1	85185.2	83540.7	105498	107697	51715.3	108996	138969	50243	80712.1	57854	106922	88458.2	92600.1	56834.4	67516.3	125157	66315.9	71893	87435.7	206371	80499.2	144282	82957.2	81412.7	121681	117569	141076	100226	102010	137923	108081
409	GlcCer(d18:1/22:0)	514.04	784.66	6266.25	4746	5055.9	4491.81	4881.31	4110.57	2807.71	49757	73529	30880.6	41927.4	28920.5	38042.3	46061.1	65571.7	31110	29220.1	51998.7	80815.9	53094.3	78361.8	43735.9	18909.7	37963.2	25343.2	22689.3	32673.1	25565.2	36583.8	37779.2	37010.8	37528.2	39901.5
410	TG(16:0/18:1/22:5)	754.102	924.8	5412.6	5300.55	5189.27	4854.52	4191.71	3619	2704.91	6018.87	6023.82	2944.34	4328.17	3126.64	4014.59	3976.62	5228.52	2650.39	2653.76	5343.68	6023.05	5398.44	9204.77	8696.08	4084.9	11389.6	5744.68	3643.32	6020.69	5578.34	5442.92	5231.15	5450.54	4764.79	4986.35
411	DG(16:0/24:1/0:0)	585.15	696.636	941.088	800.142	745.932	618.535	672.14	739.118	463.276	1112.54	1130.1	498.707	781.968	558.411	285.419	712.789	1054.11	470.464	549.244	982.104	746.6	1012.9	1553.09	2452.42	1224.33	3575.5	1573.43	1059.92	1990.79	1555.38	1021.69	1107.62	472.494	977.101	366.986
412	PC(2:0/15:0)	81.766	524.33	1234.8	1445.67	1220.67	1470.51	1203.59	1679.88	629.533	560.998	407.288	267.694	176.868	296.533	372.287	241.577	517.663	175.713	212.334	1138.98	905.587	1034.33	1849.68	939.846	457.453	1361.68	604.382	284.626	796.306	573.535	1812.3	1464.02	1825.19	1114.15	1354.44
413	DG(18:1/22:1/0:0)	585.772	694.629	4457.43	4520.42	3558.78	3433.85	4073.92	3799.94	2566.39	2725.97	3041.38	1138	1891.71	1275.5	1713.8	1609.25	3382.8	1761.03	1943.37	3458.74	3622.15	3172.06	4804.58	5978.16	2869.81	5397.88	3005.37	2153.18	4036.96	2625.15	3379.24	3328.53	3304.47	3573.57	3504.94
414	DG(24:1/18:1/0:0)	612.732	722.66	3490.43	3343.35	2943.29	3053.75	2743.31	2506.01	2053.02	1259.16	1233.86	485.191	832.398	578.146	892.423	767.321	2149.16	1063.64	1169.12	2030.12	2049.22	1846.23	2839.2	3561.85	1645.48	3237.89	1854.68	1269.56	2133.55	1550.11	2290.59	2191.86	2228.39	2280.21	2109.22
415	GlcCer(d18:1/24:0)	549.03	812.692	15257.2	11947	13118.9	10607.7	11184.7	8404.34	6418.55	46298.5	61697.1	27770.3	38103.3	22845.4	38610.7	42872.6	63659.7	30476.2	32668.7	63485.1	79310.8	58275.5	94242.7	58001.2	23610.4	51766.8	30657.7	28379.9	40052.4	30880.4	42485.4	41034.9	38940	41304.5	44055.6
416	PC(P-16:0/19:0)	480.111	782.596	29870.3	32308.8	30157.9	19138	24657.5	23789	16155.4	24023.1	29467.5	13222.4	20299.6	11753.8	19927	19167.4	23948.1	11123.7	7167.79	22589.9	26497.1	20646	29817.6	38808.2	15775.1	35059.4	11032.1	17300.7	24487.7	10654.7	22414.2	19173.4	20834.2	24087.5	21523.1
417	PG(2:0/30:0)	349.979	745.493	3922.24	2093.9	2524.34	2267.43	2186.79	1969.04	2511.51	8567.32	12272.3	4783.78	7224.77	5304.01	5542.65	7294.99	9410.17	3657.32	3836.72	12515.8	7627.85	7561.91	10864.7	33357.1	8330.01	12631	7109.82	8385.03	12556.5	9469.69	7615.19	7362.86	7593.09	7785.35	7636.79
418	TG(16:0/22:5/18:0)	712.465	926.811	7966.84	7053.39	8504.08	6848.64	12179.8	4700.11	7466.15	61891.4	55352.5	31142.5	42764	20856.8	37270.4	33394.5	46390	21296.2	23813	45648.6	42606.7	41030.1	64468.9	66779.1	33677.9	85486	36738.9	35647.5	48562.5	49519	39600	38983.1	29906.8	39313.7	38687.3
419	GlcCer(d18:1/22:1)	475.662	782.644	21252.3	20698.4	21752.2	19833.3	16637.1	16746.8	10479.4	12411.6	18931.4	8538.45	12390.4	6079.21	9179.24	10668.7	14497.5	5600.38	5693.52	11875.9	14536.8	11525.7	16833.9	15424.9	4350.86	12822.4	4518.13	6109.46	6823.94	4742.48	6645.58	6370.68	7907.95	6139.06	6037.85
420	LPI(18:0/0:0)	78.6205	601.329	265.997	284.45	261.667	252.784	216.734	228.015	164.875	876.962	1236.9	430.747	700.907	469.156	726.017	855.445	1144.65	386.51	526.326	1262.67	640.494	777.07	775.184	3024.56	989.028	1373.13	951.633	899.617	2093.55	1032.43	1022.34	896.402	915.849	838.854	957.898
421	SM(d16:0/25:0)	528.157	803.686	6127.85	4900.16	4883.04	4878.97	5378.5	4608.37	3113.9	5954.01	8257.23	2828.31	4436.84	3275.77	3239.98	4467.04	4716.03	2061.47	2108.03	3911.64	3732.28	3913.21	5771.45	10550.1	4353.6	7374.09	3860.92	4207.31	6309.36	4652.35	6109	5787.82	5842.92	6001.39	5800.51
422	PE(P-16:0/20:4)	455.456	724.52	57948.4	63826.9	69073.1	68799.8	67838.8	75179	46373.4	104908	106504	54369	74532	52114.7	74526.4	71767.2	89740.6	37126.6	42887.2	82231.3	100344	74692.5	126751	233064	89722.2	235182	104569	87215.4	137357	98544.2	90307.2	93503.6	87407.2	77963.4	81523.8
423	SM(d20:1/24:4)	486.863	835.659	10024.7	7719.85	8255.65	7129.55	9023.14	6625.52	5093.02	6273.03	8092.86	3078.97	5717.17	3107.31	3822.45	4656.29	5029.7	2100.37	2189.31	4161.45	4418.08	3394.07	5855.18	14017	5840.46	11165.5	6242.93	5627.51	9364.76	6139.5	6708.16	6643.65	7440	7740.62	7234.3
424	PC(20:5/18:0)	457.969	830.552	3116.64	4942.39	4353.43	4176.54	3312.31	3608.67	2100.27	4180.21	4512.06	2060.67	2476.28	1822.25	2880.22	2701.56	4652.17	1898.12	2069.73	3956.51	4124.84	3066.13	5302.38	7927.26	3272.89	7283.22	2465.61	3395.99	5189.29	3769.38	4048.65	3726.15	3985.75	2310.32	6127.22
425	PC(22:5/17:2)	342.072	818.565	14154.5	12163.6	10378.3	12998	9700.9	8127.72	6607.31	10209.1	10124.7	4696.54	8408.16	4507.84	6885.49	7557.57	12045	2382.33	5902.1	10223.4	7892.13	6409.06	10024.5	15469.4	6320.42	10294.4	6934.39	5752.64	10157.1	5363.82	11499.5	10613.2	10620	10431.5	11074.9
426	SM(d16:2/27:0)	526.15	827.693	18062.3	16522.3	16484.1	15523.4	16984.2	15686.1	10125.3	15195.8	27628.8	6462.07	10829.8	7019.64	7688.48	9259.96	10171.7	4550.2	4951.08	14420.6	8617.96	8271.63	15441.3	22961.3	8920.99	22579.4	8727.68	9977.96	17243.4	9384.7	15352.5	13863	13153.9	13252.1	25127.4
427	PI(15:0/17:0)	289.059	828.545	1884.78	1723.84	1643.3	1744.53	1665.52	1629.94	1167.42	8124.03	8021.61	3487.07	6473.56	3725.18	6033.72	6340.96	7949.13	2205.48	3954	6929.95	4858.68	4858.14	6652.56	14047.1	6617.85	11335.4	7534.24	7215.33	8434.03	5491.83	6084.84	6090.68	5728.55	5871.6	5612.97
428	PE(P-18:0/20:4)	457.905	752.554	167930	189332	165427	161032	152260	134310	97879.7	255887	275394	133752	185771	127451	190317	174476	191078	84260.9	98352	155213	210948	152406	239743	466690	184837	421350	216027	187790	287747	213375	213068	213798	214523	255545	228717
429	TG(17:0/18:1/18:1)	707.557	890.804	6798.89	7440.42	4713.72	3933	5265.9	2657.43	2003.71	13723.5	13725.6	6161.58	9368.55	6741.91	7547.6	8863.04	6497.22	3306.39	3352.22	4978.25	5039.2	4789.31	7996.42	10103.5	4505.67	13744.2	5630.73	4505.99	8454.46	6651.17	7643.65	7243.89	7016.52	7225.06	6961
430	PC(22:5/16:1)	363.435	828.546	54012.7	55591.1	59899.1	62318.1	50943	54642.7	37315.8	109372	100827	55953.4	76269.7	53935.1	81164.2	75128.2	144293	54048.5	65746.8	112751	126980	103749	157303	185176	74392.8	155364	86126.7	72393	109534	76884	87073	82725.2	85062.1	83567.6	82358.9
431	PI(16:1/18:0)	294.819	854.56	5682.6	5045.75	4259.96	8332.49	4723.64	7772.54	3199.16	8387.25	8852.96	3689.27	6396.72	8437.15	5985.63	6583.25	7453.91	2475.29	11847.8	6685.69	5485.98	5407.67	7227.87	12846.6	5883.5	11533.1	6722.83	6217.66	8535.11	5234.44	7557.04	15746.2	7169.34	7697.98	7366.17
432	PG(24:0/6:0)	299.224	712.511	1929.83	1819.95	1552.25	2443.72	1661.5	1034.08	982.091	1085.13	1654.45	1015.45	1430.3	921.788	1557.57	1718.25	1596.14	559.442	758.795	1547.84	1380.85	1071.08	1992.95	2413.96	1011.24	2243.97	1129.3	1139.93	1863.2	1147.81	1866.59	3463.85	1612.09	1409.83	1779.84
433	PG(24:1/10:0)	355.478	766.552	136933	121343	117289	128003	119415	105731	80576.2	325083	289025	115196	189337	155460	168746	208446	168018	71724.1	85561.4	152400	161440	130671	198187	293465	104863	211104	121284	104843	189360	118627	182306	171778	197355	166623	177647
434	LPC(33:0/0:0)	467.434	756.58	21854.7	23345.8	22634.7	21649.2	18689.8	17988.6	13321.6	19576.3	20614.1	9871.39	13436	9373.05	14154.2	12537.6	23825.5	9026.25	8961.72	21290.4	26090	19203	31905.7	32825.3	14844.6	35410	16168.6	12183.7	23599.2	14640.5	17972.8	20309.8	18280.8	18166.8	18344.5
435	PE(P-18:0/20:3)	476.534	754.569	39755.9	39510.1	43504.4	35907	36055.7	31970.2	22124.5	54913.3	58818.7	28649.4	40012.1	30419.8	39865.4	37810.3	60402.2	18495	32867.9	34144.2	43761.2	31616.5	50812.1	112516	46556.2	100142	54629.3	56569.6	73402.2	53612.5	49108.1	49237	49640	52852.7	52830.5
436	PE(P-16:0/20:3)	446.429	726.538	65838.2	55565.7	55602.1	52073.8	49605.1	46047.4	32776.7	82881.6	93598.9	40877.3	61838.5	39345.6	63855.9	60013.6	55183.3	25169.4	29393.5	49420.1	61800	44106.6	73339.7	147601	57110.6	129501	70467.6	59636.8	96676.7	62351.6	72190.6	72428.4	74548.5	70917.2	77860.3
437	TG(15:0/15:0/15:0)	681.881	782.718	3407.52	3705.4	3522.71	3743.17	3041.16	3101.38	2153.35	11248.2	12740	5272.92	7886.51	5252.82	6124.2	7920.9	9879.77	4181.15	5477.1	9452.33	9162.68	8712.94	13252.6	20029.1	8472.84	21259.1	11984	9750.25	14312	11413.8	10614.7	9718.61	8992.2	9565.74	9224.93
438	PE(P-18:0/22:5)	458.925	778.569	124065	66714.7	69834.7	64963	58458.1	53764.3	36922.3	82137.2	90004.7	42782.3	61341	40307.3	79469.7	55482.4	66234.8	27065.7	28747.9	45115.7	65657.2	46739.7	78764.9	178758	68110.6	187866	78226.8	70406.6	135538	77833.5	99094.8	77785.4	78598.1	76871.6	83800.7
439	PC(22:4/14:1)	342.816	802.531	76185.8	85135.7	94998.7	94235.7	74227.6	85398	57094.4	204470	179189	102350	119610	97305.1	152962	119089	209939	88575.6	93016.6	175173	185754	161795	230407	210450	83329.1	212156	103109	85149.9	160371	99014.3	117733	121547	122734	144161	125102
440	TG(18:0/18:0/18:0)	803.58	908.857	1371.99	1334.84	1434.63	2066.18	1706.41	1674.55	1385.75	6216.83	6544.18	3334.94	4632.55	2728.11	3957.69	5469.8	7814.98	2717.43	4565.54	7562.94	5528.93	7557.1	8355.56	14201.4	6829.28	17288.6	11623.6	9413.4	12704.9	10675.3	9041.82	7043.66	7266.6	6465.17	6367.84
441	PC(P-16:0/18:1)	448.655	766.568	198004	233458	246779	265861	199516	258918	138603	207263	211104	110548	144475	109043	168621	136136	195260	82646.2	94643.4	180571	205604	147668	251883	331956	131792	335060	155817	122688	211979	156841	186117	182975	185342	178747	173341
442	TG(16:0/16:0/16:0)	694.168	824.759	66774.2	51135.4	52555	51235.3	48041.7	31741.8	26208.2	721298	746236	353380	456817	311020	418515	500522	511178	222928	277009	447837	483644	469082	616731	1.11969e+06	493004	1.17593e+06	595320	486405	816255	580367	508410	475776	479607	477680	500504
443	DG(16:0/18:3/0:0)	452.831	608.52	4117.53	8611.42	4607.87	7459.1	6534.46	4442.71	2583.76	15558.3	18903.4	2666.6	10594	3608.52	4478.15	8552.44	17353.9	8889.01	4779.21	9248.8	11078.8	6185	14464.8	34731.2	7302.51	28764.2	6487.63	5610.18	8778.69	8886.74	13659	13901.2	7151.32	6757.69	6772.04
444	TG(18:1/18:1/18:2)	686.573	900.789	3932.27	3448.91	4103.35	3864.55	3589.89	2953.22	2187.46	33169.1	30475.3	15722.8	25077.1	13945.1	18930.6	25373.1	26999.4	10559	12488.9	23830.3	23454.9	21272.8	32168.4	45467.2	21507.7	54381.1	21404.4	24631.1	38642.7	32043	22637	20125.2	18377.1	20814.4	21542.3
445	PE(18:4/20:0)	475.545	768.547	86843.2	92268.7	50298.7	83913.8	83015.2	93050.4	61012.5	118827	114546	45974.8	86878.3	51004.6	78765.6	78793.4	130631	50626.9	37436.8	111023	76620	105836	161910	259774	106957	235179	122025	102630	162525	117510	119460	114081	107997	106297	108871
446	TG(16:0/18:2/18:2)	680.834	872.765	16217.2	15058.4	15383.6	14937.8	11968.8	10608.5	11523.9	114957	114375	57178.8	81060.1	54770.1	61176.4	75909.3	58803.7	25075.9	28748.1	52547	52181.5	47736.6	75844.2	66413.2	33836.1	100723	44390.5	37717.2	65160.8	49287.9	52629.6	51922.2	53461.2	51339.8	52714.3
447	TG(16:1/16:1/17:1)	715.35	832.729	5376.28	5537.16	6553.32	13380.1	9711.11	11328.5	7396.87	18947.6	21643	10317.3	13968.2	9937.97	16483	17431.5	33268.3	11945.3	17889.7	36995.4	28848.3	31782.5	40837.5	53708.8	27994.7	45830.1	29997.2	31104.5	38062.7	30239.1	26235.7	21878.8	22443.5	19960.9	21941.7
448	TG(16:1/16:1/16:1)	654.808	818.717	8198.76	6649.28	6914.46	6081.65	5588.03	4805.5	2930.35	88511.3	108895	39641.5	65155.9	41919.1	41027.8	57699.5	28934.9	11744.1	13552.5	24686.9	23767.4	21096.8	31325	30654.9	15981.3	48233.9	21097.5	16918.9	30619.3	22413.1	33165.4	32158.7	31011.6	30452.4	31394.9
449	TG(14:0/16:1/16:1)	653.617	792.702	14623.7	11649.6	12084.1	10038.2	9932.62	7294.74	4960.89	112362	139390	49764	82404.5	57164.6	50455.5	79172.6	41265.4	18260.3	22059	38173.2	33481.1	31287.4	48479.3	83419.5	39245.3	147752	61585.9	37745.6	76104.6	62058.1	56927.8	53655.1	54005.1	53979	55112.7
450	SM(d18:2/22:1)	422.212	783.629	18005.6	23091.3	12472.8	19179.4	14070.9	19383.6	13836.5	26371.1	27611.3	12085.9	15141.3	13430.6	17824.2	14644.2	14247.3	144596	6778.25	10363.7	10080.2	9233.65	21693.4	19695	12485.5	32644.5	7767.82	11929	17872.7	13542.1	18047.2	16823.8	14564	19932	18780.4
451	TG(18:1/18:1/18:1)	717.945	902.812	555487	487470	467627	418841	345809	271262	189663	703124	790967	341954	497750	344300	438636	473651	424614	207967	214779	427503	435780	392187	687912	456601	232382	773095	319432	205129	411793	321312	439571	425262	418490	425797	412949
452	GlcCer(d18:2/16:0)	365.248	698.552	845.047	990.211	1149.71	1080.8	1014.6	997.985	332.228	1380.09	1995.62	765.954	1014.09	956.995	1138.97	1062.18	1498.85	796.426	617.126	1342.64	2278.92	1437.26	3453.37	1570.7	585.106	1992.41	1022.9	523.884	1600.62	810.227	1173.89	1825.48	1236.15	828.704	1126.32
453	PC(17:1/22:6)	425.414	818.564	11472.2	12590	10955.2	17584	10386.7	11918.9	7272.54	19839.9	13308.1	10570.8	12710.3	5664.44	10153.4	6626.89	21572.4	6058.48	9852.2	20303.2	25315.2	13904.1	38784.5	42976.9	9102.46	42601.5	12161.2	15854.9	17429.3	19545.1	10716.8	16518.3	14887.6	8779.97	14641.7
454	TG(15:0/16:0/16:0)	703.578	810.749	10505.8	9360.76	9807.02	12670.9	11381	9991.21	7612.28	98270.3	96503.1	42219.9	66795.6	37063.5	52238.3	77278.8	86393.5	32095.3	50860.5	80935.8	58072.2	81968.8	92089.9	143056	61501.8	141494	101764	103060	124062	93902.1	94315.9	75831.1	72532.5	71751.5	76602
455	DG(16:0/17:0/0:0)	497.916	600.542	1225.93	1054.1	943.046	1090.66	940.608	973.581	622.715	1396.56	1084.23	562.625	820.328	475.728	825.63	681.429	1614.08	638.98	863.873	1343.47	1618.03	1324.54	2092.26	2602.81	1337.44	3179.99	1623.41	834.616	985.93	1945.41	1119.34	2043.01	1384.09	1083.69	1167.98
456	TG(18:1/18:1/22:1)	770.923	958.873	13151.3	11820.2	11706.8	10767.5	8945.51	7686.67	5185.21	13540.9	14849.9	6291.06	9418.5	6647.81	8681.55	9513.56	11875.8	5474.72	6063.03	11520.8	11867.9	10704.7	17675.7	16188.9	7231.46	24524.6	10989.7	6473.51	13225.1	10801.1	12972.9	11539	11441.2	11244.6	11630.8
457	TG(12:0/16:0/16:0)	652.38	768.695	1790.92	1496.33	1747.39	1562.04	1487.82	1284.99	863.899	16759	17353.1	6664.42	11618.1	8237.58	6769.93	11051.9	8444.08	4047.44	4703	8178.55	6569.39	7607.8	10346.8	43771.3	20553.1	68734.9	28583	16534.3	31081.6	29469.9	16627	15103	15655.4	14748.4	15284.3
458	TG(15:0/15:0/17:1)	683.975	808.734	10776.7	9815.05	9469.13	9497.23	7854.71	7048.49	4874.32	72818.2	77030.2	33134.7	48445.2	31078	33197.9	46488.5	36163.7	17965	18883.6	32280.5	36592.3	31965.8	45542.5	76166	37077.7	92257.3	43328.5	34796.2	59160.6	46619	42762.2	42104.3	39461.4	41352.6	40375.2
459	TG(16:0/16:1/16:1)	654.481	820.726	2328.63	1995.45	2079.09	1891.59	1772.35	1410.77	1044.68	17297.9	20989.5	7873.5	12473	8649.65	8652.56	11815.1	7427.69	2796.25	3394.84	6230.82	5805.43	5038.85	7915.5	9998.44	4571.07	13865.5	6415.98	4393.45	8336.35	6531.5	8891.48	8100.01	7500.1	7723.6	7782.04
460	DG(18:1/18:1/0:0)	519.548	638.569	302797	284308	192619	205456	227658	224365	148693	190020	202494	60884.3	118072	71976	92591.4	97090.2	218362	117880	117686	190566	226461	185153	301300	376084	183841	294000	196173	128780	264440	163272	219279	215488	218517	234689	230268
461	TG(16:0/16:0/22:5)	691.143	898.781	15091.4	17950.8	13291.1	11639.5	9804.24	7337.59	5815.97	183709	171128	115978	130131	87618.9	108802	135260	152205	63770.5	70604.6	133971	125667	122276	203049	222027	109656	265712	120366	113963	193890	153078	112933	111903	111051	112664	115999
462	TG(16:1/16:1/18:1)	676.746	846.751	51117.4	42226.2	43017.2	38507	32831.6	25931.9	17711.6	618739	603687	275885	391819	264257	284027	371930	214746	96796.6	110925	200533	204837	179404	283043	227514	120249	404379	169640	131443	239055	176613	232836	221675	231474	231860	221993
463	TG(16:0/16:0/17:0)	723.398	838.781	28243.1	22612.1	16341.3	27435.3	19046.9	23459	16901	142742	189570	88901	97875.6	79017.7	101666	149889	170090	61904.1	96624.8	130391	121515	170854	199469	262237	127050	279156	142771	136907	233286	175032	171261	111217	138597	131997	145421
464	TG(16:0/18:1/17:1)	705.538	862.781	54299.7	45009.8	43920.2	40575.5	33307.7	25824.1	19070.8	241146	240585	109568	159184	107073	122881	148286	106665	51895.3	54599.5	102627	95948.9	101304	145995	155325	80912.1	250483	103276	78061.7	145738	115565	120925	119402	115980	118686	120060
465	TG(15:0/16:1/16:1)	665.399	806.717	3448.76	3420.5	3969.07	3528.16	3040.61	2894.25	1745.78	11988	16778.9	5756.73	8416.35	5750	6754.34	7856.85	7145.23	3340.18	3708.32	6720.55	7716.49	5860.3	10406.5	15046.7	6696.83	17328.2	6950.97	5228.9	9900.71	9494.99	6667.37	6630.28	6936.86	7193.53	7178.35
466	PC(P-16:0/2:0)	82.106	522.352	8904.16	9653.86	8013.57	10657.2	10455.2	10840.7	5796.78	58365.2	85956.9	26403.5	45655.3	26501.4	40413	40333.4	130529	31049.4	57766.2	98004.2	124235	84689.7	156367	154851	56033.2	106110	62091	58028.5	82730.9	53940.4	52409.9	52447.9	51900.3	51649.2	51644.6
467	TG(16:0/16:0/20:0)	789.167	880.85	703.056	579.91	718.641	815.631	626.298	721.493	538.555	3606.63	3230.57	1650.31	2520.24	1530.16	2182.26	2927.28	2580.71	1238.22	1507.89	2589.53	2113.17	2320.31	3456.44	3838.42	1801.69	4086.19	2689.6	2525.11	3715.39	2665.54	2982.02	2469.47	2309.76	2257.01	2786.7
468	TG(16:1/16:1/18:2)	725.245	844.74	7240.34	7695.99	8055.19	11260.9	8982.01	9984.76	6660.03	33017.7	34637.3	17489.5	23810.9	15820.1	22981.8	26082.2	44167.2	15779.7	23612.6	44390.8	35376.9	40121.5	53664.2	75060.1	31200.9	73566.2	46000.7	43044.6	55738.9	39129.5	37008.2	32381.7	30422.7	29718.2	30355.9
469	TG(18:1/18:1/20:2)	721.358	928.825	25364.7	21718	21308.3	19237.3	17018.8	13026.8	10228.1	66024.4	66949.6	23044.4	44839.2	31403.9	41826.2	45997.9	46518.9	22255.8	17323.6	30349.8	41894	28835.5	50167.1	65230.2	31837.1	82566.3	36846.6	30786.2	34641.3	27496.9	33035.2	30807.9	30602.9	28337	41657.2
470	TG(14:0/16:0/16:1)	653.368	794.711	2964.33	2439.95	2483.12	2319.77	2206.46	1781.52	1204.02	19668	21950.8	8422.48	14309.1	9648.95	8634.49	13724.6	8664.54	3776.08	4633.49	7555.21	6804.56	6888.71	9961.34	19593.6	9791.4	33553.1	14043.7	8596.7	16937.9	14729.2	12480	11518.8	11077.7	10408	10950.8
471	TG(16:1/18:1/18:1)	677.724	874.773	4375.2	4046.99	4326.25	4092.3	3184.04	3117.11	1969.36	31201.3	31101.3	14965.5	21931.7	14834.2	17102.2	21475.7	15649.2	7271.89	8125.91	15431.1	15570.1	13159	21412.8	20885.8	10393.2	30254.9	12478.1	12780.6	20037.8	15970	14858.5	14732.4	14477.4	15494.2	14768.6
472	TG(14:0/16:0/16:0)	673.497	796.728	7248.23	6110.44	6627.25	6081.16	5246.78	3893.88	2916.26	63153.7	67735.9	28259	42167.2	27710.7	28744.5	40766.1	29386.4	14523.6	16355.8	29218.8	28886.9	443.707	36997	82718.1	41600.8	111476	51188.2	36785.2	62255.4	51027.2	42494.5	38853.6	38977.2	41320.1	39512.5
473	Cer(d18:1/17:0)	459.855	552.53	421.276	388.178	296.155	553.435	310.167	239.965	326.687	2824.45	3190.68	1253.39	2738.34	1695.34	2740.44	2092.45	2040.22	1093	1031.4	2025.53	3187.95	2492.81	3902.84	5248.51	2041.46	4180.26	2066.57	1755.69	2606.42	2333.09	2730.41	2265.32	2662.99	2534.02	1945.11
474	LPC(16:0/0:0)	81.573	518.317	1104.05	1147.02	905.253	1174.23	1220.28	1131.37	638.91	6833.52	15083.8	3677.28	6491.16	3468.47	5302.9	5594.42	10718.1	3501.95	5386.91	12490.3	7450.47	7785.24	10863.7	46090.2	8857.17	17782.3	11096.5	9818.45	14984	7520.71	8487.22	7381.23	7664.26	7329.01	6974.65
475	TG(16:0/16:1/17:1)	685.162	834.75	15107.3	13273.5	13351.2	12807.4	10310	9570.46	6107.01	105362	106630	50436.7	70351.5	47657.8	51293.7	70658.3	42279.3	20004.4	21874.8	40032.9	40794.2	36077.9	56329.7	60757.7	31859.7	102783	40975.9	32268.7	61118.9	45758	46269.7	47398.1	45979.6	48375.1	46645.9
476	PC(30:0/14:1)	621.601	922.717	1477.7	1134.36	1284.92	1173.58	1110.06	1031.55	898.869	2016.03	1215.44	464.631	804.97	464.186	794.265	808.756	1427.85	656.652	776.448	1429.42	1471.28	1378.5	2089.88	4114.23	1415.6	2683.26	2078.75	1374.17	1896.37	1445.1	1577.9	1966.4	1715.34	1718.31	1331.44
477	TG(14:0/14:0/14:0)	627.736	740.663	678.352	639.631	727.2	753.098	651.382	714.292	450.831	11254.3	11594	5281.52	7737.77	6179.74	4748.91	7953.89	5414.99	2628.16	3038.5	5259.54	4758.13	4567.1	6726.54	55683.9	26525	109034	43453.6	19607.6	41350.9	40618.8	17370.1	16471.9	17650.8	16948.6	17009.5
478	TG(16:0/16:0/16:1)	674.642	822.743	12337.8	245.766	11159.8	10156.1	8620.53	6932.6	4860.26	174276	176980	77862.8	112872	75198.2	82176.1	104010	61632.7	28386.5	33293.8	58697.4	60174.5	52993.2	78718.1	93001.5	49448.8	160619	70713.8	48414.9	91325.2	66030.6	73479	69463.4	72829.1	73404.3	405.538
479	TG(18:0/16:0/18:0)	770.052	880.829	12379.9	11981.4	12551.6	22115.7	17915.5	18036.1	14424.3	124853	120528	53302.1	87261.2	49875.2	68813.8	106890	152437	52475.5	92179.3	152574	89513.3	151947	162790	239012	110380	245408	195896	189885	211777	166865	172247	134525	118388	111617	125447
480	DG(16:0/16:0/0:0)	477.18	586.527	13120.8	12920.8	12372.7	12096.7	12813.8	11558.6	7755.88	26074.2	31854.2	11188.7	19727	12035.1	18807.6	16603.9	28922.4	14391.7	16846	27788.8	30909.2	24907.7	36379.5	53772.5	23110.4	42754.9	26312	19689.9	34147.7	21677.4	21644.6	22410.3	22523.6	23239.1	23329.4
481	TG(16:0/18:1/18:1)	717.041	876.797	1.61616e+06	1.40261e+06	1.36761e+06	1.13788e+06	922672	717240	538811	4.58975e+06	4.98005e+06	2.18157e+06	3.13004e+06	2.17538e+06	2.63906e+06	2.83385e+06	2.68667e+06	1.31928e+06	1.2844e+06	2.49094e+06	2.75372e+06	2.52018e+06	4.01366e+06	3.5151e+06	1.78549e+06	5.53591e+06	2.19659e+06	1.48864e+06	2.92117e+06	2.3693e+06	2.5201e+06	2.44817e+06	2.4119e+06	2.48585e+06	2.44545e+06
482	TG(12:0/12:0/20:1)	652.383	766.688	8874.1	6862.55	7245.4	6179.53	6091.2	4489.54	3436.31	111282	119404	46892.4	81978.1	58965.1	43525	78755.2	51753.9	24605.3	28188	49219.1	39037.3	44308.8	57682.5	278839	129311	481991	190407	101419	209570	196817	109284	101715	100342	97297.8	102939
483	TG(17:0/17:0/17:0)	754.163	866.811	6948.52	1655.19	5190.27	2505.95	1385.26	1799.21	1560.83	22895.4	17733.8	11358.2	14265.4	4785.18	6610.01	14205	19390.3	5435.56	11485.6	14638.1	14694.7	18405	23195.6	27801.5	13446	24989.8	23537.1	22329.4	22341	21175	20445.5	13949.5	13835.2	12564.4	14937.9
484	LacCer(d18:1/16:0)	336.602	862.618	3455.83	2927.41	2139.61	2999.39	2721.13	3244.74	1459.94	4858.59	4844.66	2118.52	3813.74	2201.25	2871.65	3686.38	4065.19	1510.02	2203.31	4024	2756.81	3032.98	4059.63	6889.18	3153.98	6224.13	3992.76	4478.46	4574	3486.35	6122.96	4931.38	5224.34	4603	4436.06
485	TG(18:0/18:1/18:1)	741.271	904.828	281247	237140	208307	182318	168371	115503	98858.1	674533	883722	306597	445390	300455	362352	421773	441495	217702	210203	515902	439139	438601	645639	583592	302900	831849	355823	262703	473317	407589	535428	396856	407350	398816	388499
486	TG(20:1/20:1/20:1)	802.756	986.904	6635.16	5903.14	6466.76	5747.65	4400.6	3973.47	3107.08	3847.7	4237.41	1929.34	2627.07	1945.32	2502.7	2792.12	4359.55	1890.96	2178.65	4446.8	5300.11	3749.33	5856.73	7041.32	2967.41	10087.2	4272.61	2747.48	5162.38	4467.02	5089.02	4318.68	4766.63	4339.08	4040.18
487	TG(16:0/16:0/22:1)	770.052	906.844	22405	17519.5	18979.4	17922.5	15857.8	13751.7	11259.5	90934.4	93933.3	41682.3	64486.6	81200.2	52321.8	73618.3	89767.5	40567.9	51372.1	87108.2	75648	84168.5	119367	148139	68181.6	186156	107233	81212.1	135301	154658	97991.8	81911.7	79414.3	76965.8	80057.8
488	TG(17:0/18:0/18:1)	754.322	892.826	8040.29	5854.94	6582.71	5930.7	5004.77	4042.36	4438.8	23799.6	27152.7	11503.1	17006	14719.9	15444	18740.7	19640.2	9025.05	11475.4	18498.2	17885	20244.2	25678.4	37101.3	16598.8	42288.2	23708.3	19088.2	32645.3	23558.9	21828.6	20720.5	18128.2	18897.4	18358.1
489	TG(16:0/18:0/16:0)	716.163	852.789	186794	153772	163292	160272	135141	114762	87644.8	1.16256e+06	1.21565e+06	571300	817615	537026	718383	837972	999073	458429	511581	928571	973635	904203	1.38397e+06	1.82982e+06	807163	2.02347e+06	1.03736e+06	841193	1.40262e+06	1.04376e+06	945736	867582	833746	837261	815287
490	TG(16:0/16:0/17:1)	704.829	836.766	41197	32445.4	32013.2	30514.4	28322.1	19906.2	16495.3	338119	332615	155433	223016	145328	166116	223118	192377	91066.7	101469	167621	169324	178270	236923	392936	179845	450647	228887	193701	327295	249427	213360	211063	198317	204595	205320
491	PC(O-16:2/2:0)	69.451	520.335	1023.98	1039.01	1208.84	1455.79	1213.11	1485.21	783.323	7038.54	9045.62	3332.14	5280.06	3305.63	4690.01	4601.23	15513.6	3883.51	7180.63	11470.6	15468.4	11949.7	20025.7	16671.2	6635.27	12487	7240.74	6753.37	9864.4	6691.92	6172.08	6201.3	6035.14	6012.9	6047.81
492	TG(16:0/18:1/16:0)	716.174	850.783	1.47012e+06	1.13628e+06	1.21591e+06	1.06163e+06	898143	696722	580830	9.15625e+06	9.85602e+06	4.49521e+06	6.40406e+06	4.17449e+06	5.52454e+06	6.57899e+06	7.65197e+06	3.45891e+06	3.75859e+06	6.77044e+06	7.53222e+06	6.98109e+06	1.01978e+07	1.4033e+07	6.26304e+06	1.52589e+07	8.06535e+06	6.23975e+06	1.04609e+07	8.19532e+06	7.09237e+06	6.56491e+06	6.4749e+06	6.60778e+06	6.39651e+06
493	PE(O-16:2/22:4)	397.497	772.511	5438.6	6216.09	6951.01	7075.78	5386.39	6173.68	3938.7	12468.7	13107.5	6687.62	8913.93	6381.76	8454	8530.4	9549.41	4238.67	4183.14	7520.44	10442.2	7088.23	11188.8	24571.3	9506.62	22422	11262.8	10054.9	14766	10395.8	9398.35	8893.79	9314.57	9523.56	9516.14
494	TG(16:0/16:0/18:1)	694.995	850.773	99251.3	87981	80975.8	72697.2	65078.6	45749.6	36335.8	713024	784407	366100	488271	348266	444307	484674	390563	182873	208747	365206	387414	359484	524874	598368	302133	871571	371840	289382	506660	371947	391199	359624	380369	372274	374453
495	TG(16:0/16:0/18:0)	756.975	852.821	2617.65	2775.94	2123.28	2702.56	2291.88	2555	1913.07	13521	15697	6356.3	11283.7	6605.96	1475.17	11769.5	11850.6	6229	7537.2	10753.7	9698.71	11690.2	15312.2	17635.9	8548.68	14465.3	11411.5	11403.1	15179.1	11044.9	11305.3	13786.8	10895.8	9839.11	10525.2
496	TG(17:0/17:0/17:1)	726.924	864.795	45585.2	36303.5	34102.5	32323.3	29650.3	21204.7	22981.8	213523	208742	95104.3	138718	86472.1	109496	148717	133484	64061.5	76746.2	122956	119303	130815	182283	255003	118947	298899	157533	125004	214543	169752	155303	138866	139237	135319	138116
497	TG(15:0/20:1/20:1)	755.715	918.841	6657.79	5949.32	5016.93	7406.51	4319.1	4197.77	3114.28	12919	12494.4	5452.93	8668.71	5682.46	7038.22	9519.35	8765.46	4484.56	4423.35	8799.06	8011.78	8665.08	12117.3	14362.6	7325.25	16377.5	8935.15	6460.46	11211.3	9382	9504.96	9236.23	9424.79	9274.5	8505.64
498	Cer(d18:2/16:0)	336.239	536.499	1363.87	1228.85	1026.71	960.129	1056.15	855.001	665.511	3818.37	4347.47	1451.51	2555.24	1501.79	2430.18	2738.69	2802.71	1089.54	980.507	2984.94	2287.01	2172.17	2706.45	6091.04	2099.95	5083.49	2832.65	2853.8	3626.72	2387.28	4446.06	2951.73	2474.42	2497.51	2544.98
499	TG(15:1/14:0/18:1)	694.654	806.725	986.477	796.639	969.56	882.352	900.247	682.899	447.259	6300.18	6658.77	3631.95	4583.87	2873.67	3342.33	4660.23	4686.24	2106.01	2535.98	4927.24	4780.65	4480.88	5242.39	10664.5	4334.91	13114.6	6203.02	4302.14	7482.19	5665.88	5364.12	4592.92	3924.39	4328.49	4404.99
500	TG(17:0/16:0/18:1)	704.795	864.787	14016.7	8732.06	8896.22	11611.9	10321.5	7892.84	2299.59	45222.7	73900.9	20649.7	48533.8	33739.5	23730	30300.7	27868	11575.9	16166.8	25841.7	24475.2	25911.2	38551.1	43131.4	21122.7	54642.4	23552.1	19375.4	32492.3	26886.9	30204.2	26306.8	24908	26071.3	25470.9
501	PE(O-16:2/24:1)	537.46	806.597	3355.26	3408.78	3059.58	3010.01	3004.63	3163.3	2031.34	3322.03	3732.66	1581.44	2514.23	1674.08	2604.94	2327.26	3067.26	1295.65	1465.66	2622.4	3352.01	2559.34	4126.47	6960.76	2735.11	6148.74	3187.98	2664.31	4098.69	3059.95	3937.65	3497.1	3326.24	3389.11	3207.86
502	PC(P-22:0/2:0)	223.497	606.444	632.492	666.555	730.799	804.688	517.557	623.063	396.345	1438.89	1444.93	419.987	744.645	512.542	1084.11	684.23	965.148	569.289	787.299	1662.68	1092.18	1392.12	1232.85	2472.13	1052.78	3745.81	1816.58	1062.75	2377.45	1808.23	1484.63	1188.04	943.556	1628.75	1392.79
503	PC(P-18:0/2:0)	114.182	550.382	827.661	1001.48	788.682	1124.88	846.427	991.624	449.842	1314.95	2138.29	1031.25	1609.8	670.1	1456.8	870.797	1356.07	1145.54	1415.21	1707.1	1143.99	2597.69	1583.83	9715.89	2470.05	4245.48	3278.09	2538.75	4178.27	1387.81	2509.19	1730.78	1410.9	1424.11	2361.52
504	Cer(d17:1/16:0)	354.869	524.498	121.438	133.921	151.46	191.18	168.862	215.385	117.576	456.604	366.973	222.988	245.714	172.661	318.076	425.681	462.419	156.182	196.502	285.561	290.687	292.085	430.928	771.565	284.208	466.809	412.437	350.841	451.784	448.669	341.028	349.662	273.827	323.838	253.888
505	TG(14:0/14:0/17:0)	651.841	782.706	363.104	349.103	366.959	416.481	368.28	347.309	230.115	1503.18	1423.96	747.341	2123.73	920.435	1683.6	1182.63	1009.36	699.581	708.624	1292.79	1324.21	1264.48	1779.91	6698.03	2851.67	8011.39	4031.31	2296.31	4158.39	3885.16	2525.48	2263.14	3336.12	2193.51	2055.45
506	TG(14:0/15:0/14:0)	659.156	754.686	1597.17	1385.36	2507.65	2038.46	1549.64	1595.86	1081.81	3460.97	7373.86	1707.34	2495.01	3601.77	1958.09	2399.28	3342.46	1461.27	1667.18	3189.09	2925.05	2767.99	4278.83	9362.41	3677.29	10124.9	4827.45	3332.1	5565.26	5144	3835.62	3531.43	3691.67	3494.86	2910.13
507	TG(16:1/16:0/18:1)	675.858	848.758	9599.81	8602.17	8540.23	8041.77	6713.39	5989.24	3795.4	104670	103915	46473.2	68341.2	46176.4	51214.3	63806.1	39935.5	17777.4	20170.9	37092.5	38383.9	32484	50647.5	46294.7	24010.1	80528.1	33092.5	25303.6	46657.8	34447.4	42809.9	39661.8	39799.5	43405.3	40738
508	PC(P-22:0/6:0)	366.961	662.525	1348.43	1696.25	1854.82	1862.61	1794.09	2101.52	1152.73	2938.54	6160.83	1840.19	1951.73	1959.15	1730.84	2364.79	2473.84	1343.08	1013.53	3055.81	2481.44	2824.22	4346.41	2268.07	1967.52	6005.94	1800.77	1523.56	2653.61	2073.75	2936.41	2932.9	1930.81	1757.35	2268.64
509	TG(16:1/17:0/20:1)	728.718	890.81	42053.2	30706.1	25286	26356.2	22943.7	15672.6	13559.6	82670.5	70644.2	35533.2	51843.1	32238.1	79883.3	48812.8	40675.2	20469.1	22234.5	40416.4	36719.2	39939.7	60679	64581.3	30566	91092.9	39483.2	28451.6	55799	44504.4	51113.3	46204.1	46030.9	46824.7	44180.7
510	TG(16:1/22:6/18:1)	711.187	920.769	2285.96	2234.24	2291.72	2573.51	1930.64	1877.53	1123.18	2919.76	3417.29	1798.21	2862.6	1573.07	9355.17	2147.59	2052.74	934.976	1309.5	2806.63	1865.47	2775.49	4478.88	3720.09	1641.41	6130.07	1684.75	1367.13	2850.27	2570	1751.49	1638.88	2138.57	1899.82	2373.03
511	TG(16:1/20:0/20:0)	802.379	934.873	4831.28	4181.79	4785.01	5343.61	3902.43	3705.46	3182.63	11785	13024	6185.78	8817.55	5593.28	7379.31	10200.7	16892.2	6397.59	8942.59	15933.9	13186.3	14394.2	18643.4	29398.2	13950	39353.5	23982.5	16072.2	25474	22764	18342.4	14782.4	14810.3	14012.5	13560.1
512	Cer(d18:2/18:0)	444.023	564.53	1906.94	1737.29	1468.57	1694.49	1152.68	1213.43	937.457	23064.8	22837.2	11378.5	16769.9	9380.67	15890.2	17287.5	14721.1	6278.03	6902.3	13178.2	17953.2	11851.5	18236.8	24730.5	11785.8	16844.5	11014.1	10124.9	16190.5	34592	11521.5	11138.3	12151.9	11971.6	12194.3
513	TG(14:0/14:0/17:1)	662.912	780.701	2540.72	3520.69	2999.83	2632.84	2245.87	2301.22	1337.29	6761.09	9387.14	3380.4	4916.7	3343.4	3819.51	4290.6	4881.73	2462.43	2548.58	6804.9	5191.68	4292.66	7176.83	11329.9	4910.49	14808.1	6344.87	4465.36	8142.55	7152.71	5183.22	5195.52	5236.83	6286.98	5130.13
514	TG(18:0/16:0/18:1)	741.034	878.813	330545	252741	245023	234317	211432	157415	144970	1.77585e+06	1.90434e+06	908645	1.26736e+06	834444	1.52363e+06	1.32819e+06	1.67009e+06	743634	867621	1.48501e+06	1.54971e+06	1.54658e+06	2.29218e+06	2.78052e+06	1.58713e+06	3.34828e+06	1.72315e+06	1.38379e+06	2.38082e+06	1.81314e+06	1.57722e+06	1.37339e+06	1.42128e+06	1.4106e+06	1.33668e+06
515	TG(17:0/18:1/20:4)	696.233	912.792	3003.58	1792.54	1605.05	2653.85	1578.28	1198.05	846.701	7740.19	7741.36	3974.54	5583.7	3806.75	4363.19	5996.03	6067.3	2658.83	3978.6	7513.25	6229.03	4801.32	8259.71	12797.9	3933.77	14574.3	6050.31	4048.48	9764.13	5636.81	6094.91	5448.87	4757.61	4892.58	4606.46
516	PC(18:3/20:5)	377.689	802.552	16324.9	17525.6	21378	28974.5	16193	18307.5	28061.9	9423.06	9903.82	4833.85	6297.9	4975.01	7433.85	6630	10075.3	3836.27	4488.08	8716.05	6517.04	6198.74	10327	15329.8	7784.07	18174	7657.23	7446.62	11267.9	7951.73	12305.4	11166.6	10956.9	10612.8	12159.5
517	Cer(d18:1/20:0)	522.472	594.578	1352.56	1139.05	879.885	1292.53	1175.89	1225.18	553	18548.7	20976.9	9034.71	17346.2	7934.01	11148.2	14280.5	16771	7632.99	9370.22	15469.7	19831.2	15338	20938.1	16130.4	7373.12	12224.1	8038.89	8097.86	11466.2	7293.89	11896.6	11260	11402.1	11224	11375.1
518	PI(18:3/20:1)	300.228	904.574	4144.96	3840.91	3201.55	3612.23	3119.21	2544.56	2039.02	4033.73	3652.88	1680.96	3150.3	645.917	3371.81	3184.86	2595.49	883.074	1300.82	2484.98	1841.2	1873.88	2901.26	5726.88	2295.3	4592.22	2901.4	2504.07	3181.41	2095.92	3605.3	3680.6	3613.85	3723.83	3484.09
519	LPC(26:0/0:0)	289.165	658.472	671.315	600.295	731.905	628.094	587.761	336.017	406.279	1264.07	1274.78	656.072	1754.95	755.721	1171.93	1095.36	1055.71	404.273	435.524	1043.32	943.856	441.008	1348.99	2634.67	1130.56	2692.43	1526.56	1265.43	1477.17	1255.95	1035.84	990.273	1117.74	964.55	1122.19
520	DG(18:1/20:1/0:0)	554.082	666.598	25331.7	25627.7	16586.9	18229.8	20320	19473	13314.2	14764.7	16357.2	5340.81	9779.63	6068.25	8434.91	8330.73	19829.3	9321.09	9846.4	17448.9	18547.2	15356.7	24316.2	31188.5	14209.3	22740.3	14192.2	9782.87	19805.3	11830.3	19313.7	18854.4	18702.4	18826.6	18323.1
521	TG(16:0/18:1/16:1)	695.111	848.767	726484	625950	576321	541594	468712	330652	246541	5.42118e+06	5.84091e+06	2.65508e+06	3.68744e+06	2.57121e+06	3.29085e+06	3.57066e+06	2.80702e+06	1.28257e+06	1.44837e+06	2.58731e+06	2.6631e+06	2.47254e+06	3.67775e+06	3.86833e+06	1.98785e+06	6.1368e+06	2.59169e+06	1.9058e+06	3.41483e+06	2.51833e+06	2.73197e+06	2.56489e+06	2.73276e+06	2.65622e+06	2.69673e+06
522	Cer(d18:1/16:0)	336.813	538.515	3873.43	3385.52	2524.44	2696.39	3105.28	1956.28	1839.53	3480.55	4448.68	1756.22	2402.36	1702.71	2316.2	2727.97	3185.56	1061.17	1504.16	3412.01	2170.97	2458.2	2588.03	5425.55	2383.23	4758.24	3160.3	2854.56	3613.66	2882.79	4371.63	4045.35	4097.01	4271.17	3604.77
523	TG(22:1/14:0/22:1)	802.391	960.889	9673.45	8500.35	9135.37	8286.82	6077.88	5317.53	4746.16	11292.8	12114	5277.34	7630.51	5476.46	6824.32	8137.89	12974.3	5854.13	6673.65	12604.3	13937.5	11398.2	17099	24488.6	11208.5	33888.6	16095.3	10221	18903.6	17819.4	14039.3	12328.9	12057.2	11821.2	11315.3
524	PC(O-22:2/4:0)	217.856	632.46	123.885	144.612	164.255	153.837	139.739	157.304	103.089	537.156	561.286	278.123	411.139	237.079	356.528	415.122	685.86	233.767	277.405	669.199	568.548	441.623	713.076	1205.5	559.613	1121.42	580.312	515.565	764.254	494.958	443.031	455.839	452.346	413.721	385.441
525	PC(P-22:0/4:0)	288.965	634.474	1016.18	963.522	931.184	986.554	793.871	762.072	571.649	1084.24	1406.51	678.769	931.796	854.998	1133.32	904.514	1219.08	509.686	632.312	1196.55	1109.56	932.275	1390.13	3517.29	1404.69	3221.89	1485.51	1249.15	1993.6	1328.65	1187.12	1197.49	1912.3	1209.25	1260.49
526	PC(24:4/12:0)	439.918	782.563	125451	128090	154627	167501	122028	120696	82381.7	187525	221890	115413	145793	124213	171914	139571	238509	110526	116166	245592	275354	212022	360586	382234	158713	402757	167458	144834	242183	194167	165851	160959	155326	164397	168893
527	LPE(18:1/0:0)	85.292	480.305	2003.25	2252.15	2313.52	3100.52	2401.94	3058.48	1535.08	5980.94	8577.26	2900.06	4538.13	2917.69	3783.11	4053.43	8431.84	3917.36	4626.4	14382.1	11357.5	8456.87	14294.2	25119.7	7853.19	15348.7	8532.03	6434.44	12638.1	7859.78	6638.75	6531.99	6648.68	6266.15	6561.85
528	TG(18:0/18:1/22:5)	712.592	952.827	7264.51	6233.51	6608.23	6779.47	4771.87	4325.17	2981.83	20580.9	20079.5	10544.9	13271.3	9611.18	12266.5	14265.3	17914.8	8209.99	8635.45	18998.5	16239.5	16742.7	26328	26287.1	10519.2	29827.2	22834.2	19765.3	24870.1	18531.4	14241	14659.7	12791.9	14576.1	13815.3
529	LacCer(d18:1/22:0)	475.73	946.713	1151.55	668.429	719.412	710.667	884.217	569.034	503.855	804.67	1024.49	369.414	461.405	480.554	602.697	776.483	904.351	377.947	379.076	535.615	494.895	512.013	2403.31	2460.47	534.514	1121.14	914.423	509.913	784.655	776.951	1027.92	915.881	1134.26	791.134	1348.52
530	TG(18:1/20:1/22:5)	784.549	978.849	3527.43	5377.01	5388.45	3873.71	3161.12	3212.97	2746.28	4160.73	4388.4	2575.93	3012.53	2375.41	3564.29	2714.55	5878.59	1490.86	2645.6	5521.03	17966.9	3454.5	9185.16	24098.4	6262.2	26855.2	8360.46	3734.34	6023.6	4662.72	3789.41	10075.1	11358.3	3837.46	3909.52
531	LPE(18:0/0:0)	76.193	504.303	401.883	466.255	608.765	594.57	414.159	711.401	296.776	1123.08	984.463	502.399	747.142	499.609	681.287	707.264	1456.61	475.437	547.084	2692	1450.96	1364.71	2230.33	3566.19	1356.26	2213.26	1000.93	1174.33	2084.19	1174.09	1036.99	696.942	1088.58	991.246	1073.3
532	TG(16:1/20:2/22:4)	694.229	950.81	7244.52	7486.98	6608.66	6062.32	4931.05	4141.88	2866.97	17125.6	16216.7	9212.82	12349.1	8445.11	9834.04	15794.6	15001.6	6441.35	7291.77	14387.2	13499.9	11758.9	19850.1	14936.2	7160.64	22713.4	9904.88	6527.42	14709.8	12280.5	11314.8	11874.2	11278.1	22595.8	11902.5
533	TG(14:0/20:5/16:0)	653.779	842.716	1107.43	844.279	1002.86	1214.12	793.844	719.543	464.93	5626.32	5520.57	2859.64	4036.93	3019.71	2921.7	4322.95	3912.3	1625.6	2080.57	3637.1	3056.92	3413.31	4820.64	5953.65	3001.15	7722.37	3158.96	2909.41	5208.29	4223.11	3461.26	3369.57	3351.43	3337.2	3201.04
534	DG(18:1/18:2/0:0)	489.656	636.552	23731.3	22969.6	17983.7	18515	18064.6	16903.4	12159.1	29650.9	31857.3	10743.9	19350.8	12169.9	15470.1	15763.5	34539.9	16997.8	17904	30175.2	31471.1	28090.2	44524.4	67583.3	30016.2	49104.8	30510.6	22313.9	42111.1	25309.4	27985.8	27796.1	28975.1	28135.4	28807.2
535	PC(17:2/22:4)	361.722	820.578	12530	10954.2	12475.2	11371.3	11113.4	13727.8	7708.75	8887.88	10001.7	4810.66	6237.75	2404.75	7025.1	7576.4	11562.6	3903.18	4989.36	9628.84	11637.3	6582.41	13170.5	9666.23	5274.63	12472.4	7816.9	6357.6	8929.96	6836.07	9864.59	9015.04	9963.18	9460.47	9876.78
536	PE(O-18:2/20:4)	381.724	750.53	14983.2	13961.1	13818.1	13571.5	13390.6	13498.3	9549.61	17881.6	17773.3	10977.8	13788.9	9460.45	12781	12899.4	23834.6	10346.3	11314.5	22798.2	22754.7	19570.7	33802.4	34033.3	12823	34106.1	15548.1	13638.7	18793.7	17410.2	21550.3	17943.4	16988.8	16498.5	18809.3
537	PC(P-22:0/9:0)	416.738	704.553	78326.2	108198	115267	74612.4	66884.9	86112.8	61079.6	51876.6	50386.6	25283.3	76928.5	52924	47286.1	73508.2	112545	27280.8	45305.5	102805	63848.9	88246.7	150039	168243	69124.6	94461	77498	73929.1	103407	41957.1	87461.4	59246.1	47520.1	114015	57471.7
538	PE(P-16:0/16:1)	360.435	696.49	3401.77	2957.71	3372.28	3728.61	3188.03	2775.14	1838.96	3653.04	4090.37	1909.77	3447.7	2150.58	3511.68	3272.69	3204.97	1507.86	1612.08	2645.65	3007.67	2650.9	4105.56	6557.21	2137.33	4932.75	2747.31	2143.46	3446.67	3051.95	3051.95	3309.63	4146.07	3948.06	3629
539	PC(O-22:2/6:0)	319.628	660.492	414.342	456.43	390.824	387.653	464.495	437.787	289.072	1345.98	1173.57	525.078	785.179	462.602	826.493	646.785	942.422	334.878	378.53	625.989	769.575	660.067	996.115	1923.43	616.022	1303.44	685.326	591.236	816.508	628.866	1050.09	715.692	769.275	648.073	736.583
540	PE(P-16:0/26:2)	566.953	812.65	2035.61	2181.74	2192.71	1965.18	2030.97	2209.57	1420.15	2918.87	2330.61	1089.43	1762.52	1222.08	1615.25	1504.03	3604.55	1070.74	1100.91	4452.75	3607.15	1495.07	3281.36	4687.41	2060.01	4590.36	2204.47	1896.18	2587.32	2225.26	2199.33	2143.79	2997.75	2268.16	2067.01
541	TG(16:0/20:5/16:1)	654.809	868.732	2434.98	2118.57	1494.5	1923.21	1703.27	2390.65	772.839	22806.2	18499.4	10534.2	13889.3	9673.75	9476.13	14293	12662.9	5101.72	6120.62	11362.9	9996.09	9861.78	14629.8	16242.6	7382.41	25917.1	8866.04	8429.15	16194.3	12032	10254.9	10076.6	10239	10190.8	10465
542	Cer(d18:1/22:0)	558.418	622.61	8557.37	6916.66	6424	6584.41	6225.24	5097.87	3913.38	111046	139353	61595	91511.9	52548.8	73643.2	87709.5	142134	57965.3	73095.4	128215	163564	128140	187075	126066	55458.7	93327.8	60247.6	63213.3	87494.3	58012.4	79795.9	78222.9	79473.8	83483.4	76406.4
543	TG(18:1/22:2/18:1)	744.468	956.857	6581.29	5881.94	5846.14	5143.86	4721.7	3686.62	2777.7	7692.88	8911.56	3737.07	7361.32	4082.46	5092.05	5679.28	6777.7	2959.23	3448.15	6797.61	7093.75	6466.61	19266.7	7733.31	3929.12	11168.1	5010.87	4905.78	6786.57	5098.79	6696.63	6816.38	6151.75	6289.84	6216.28
544	PC(O-22:2/14:0)	460.966	794.598	226711	206863	143317	136093	171951	124141	77461.2	196300	237926	57058.6	82525.4	57551.6	92478.9	156064	205649	50514.4	59556.8	115997	128330	100376	159606	192206	80561.6	184746	94073.9	77634.9	124473	83685.7	109519	109067	111409	107792	176421
545	TG(17:1/16:0/20:3)	694.643	886.778	2769.17	2080.57	2215.82	2274.7	1594.06	1555.18	1217.76	15129.3	14520.9	7533.23	9810.63	6426.26	7890.93	10798.7	9297.16	4022.3	4555.9	8674.59	8257.38	7868.24	13202.9	13734.4	5351.05	15419.7	7740.76	6171.95	11185.7	11822.1	7853.11	8426.04	8701.41	8004.96	7957.07
546	Cer(d18:1/24:1)	557.934	648.626	79150.2	72929.1	54868.4	62993	51726.2	39795	29080	256930	269174	114075	169680	99878.5	137377	156592	319040	126041	141388	265573	337207	248359	385806	369560	170949	281329	159219	162778	226471	163948	187683	192390	192416	192717	186959
547	PC(O-22:2/7:0)	300.208	674.506	364.065	335.853	356.73	385.339	312.826	351.202	247.082	476.519	423.04	214.491	296.278	246.945	275.377	270.523	428.825	183.677	193.652	461.445	454.038	387.661	568.618	1460.72	786.366	1430	729.631	634.238	1034.96	831.804	531.874	506.66	527.88	494.095	510.614
548	PS(20:1/18:3)	332.678	812.532	9445	7315.9	9989.51	7521.17	8797.91	6402.11	5720.9	68921.9	80192.7	36993.3	57229	37287.3	66549.7	65278.8	81499.1	29048.8	46559	88261.9	59957.9	62207.1	91690.8	145331	64880.8	153480	128171	98897.3	104997	69727.3	78253.7	72333.1	71469.6	68836.6	71042.4
549	TG(16:0/20:5/18:1)	728.287	896.77	23594.3	22507.3	22428.9	22184.3	17726.7	15622.2	10481	33628.3	35088.7	18148.8	24012	17634.9	21691.3	22507.4	29259.8	12947.9	13988.1	28213	27681.3	25592.5	41825.1	44568.6	20382.6	62383	24762.6	18498.8	33481.1	26383.6	26095.6	25773.2	25663.1	25542.6	26025.6
550	Cer(d18:1/24:0)	590.157	650.642	37551.3	28639.2	27295.6	28138.3	25413.5	20616.9	15220.6	163579	184741	85178	114589	75918.9	115555	129967	245682	106391	126502	222217	260421	198544	325452	276937	115592	217584	138381	127002	186539	117478	154529	147489	149204	140219	151095
551	PC(P-22:0/10:0)	476.055	718.567	110175	100029	100324	78236	91331.8	79402.3	49391.7	122297	156223	62324.7	92681.3	59393.6	87412.4	89932.9	116445	57146	12640.7	22878.5	130954	104786	163878	212842	93394.4	194915	116531	94750.1	143828	111606	130867	106507	123449	131310	135988
552	PC(O-16:2/19:0)	466.13	780.578	17201.4	67422.3	18004.6	15082.8	17452.6	55644.4	9217.46	33821.8	27735.3	19062.1	11836.1	39241.3	14123.2	29042.9	41849.9	13869.5	20014.6	55034.4	36535.2	28328.7	87048.8	87544.8	29251.6	29337.3	38839.2	34066.7	21412.9	59938.2	34957.4	18491.4	19397.1	15777.3	17165.7
553	Cer(d18:1/18:0)	482.017	566.547	2792.34	2295.76	2757.61	2152.99	2398.4	2599.01	1794.96	93299.5	109084	46927.6	76429	43743.3	59451.9	78076.5	73355.6	33355.5	39628.2	62708.7	94441.1	71675.1	95438.9	70331.8	31775.2	52200.2	33270.1	35965.8	48369.6	34046.4	55207	54234	54594.2	52692.3	57868
554	PS(20:3/20:3)	294.675	836.53	9306.34	8256.45	6837.15	12163.9	7764.15	6508.57	5073.36	11190.1	12212	4661.07	8907.85	5343.63	7817	8716.29	7798.96	2597.91	4080.64	7791.48	5271.96	5405.82	7147.76	21569.8	7836.15	14674.6	8590.09	8154.7	10405.2	6663.56	10327.3	13825	9715.2	9643.67	9814.9
555	PC(P-22:0/8:0)	394.75	690.539	772257	663264	670079	600633	546090	481156	353660	306115	335226	136767	226011	146327	207512	212208	261954	108703	130797	227063	252110	210148	280373	541308	217898	470248	256439	228068	315400	245703	427934	428793	414834	431763	418726
556	DG(18:1/20:4/0:0)	464.241	660.541	1613.57	1396.19	1177.15	1585.11	1594.92	800.031	994.527	2979.51	3052.9	1202.09	1889.45	1104.07	1830.96	1515.33	5340.8	2435.27	3002.57	4358.44	3617.85	2833.45	4951.45	10237.2	3349.78	52659.9	4090.77	24302.2	6348.38	33242	2457.85	3099.5	3682.54	3172.03	3225.03
557	LacCer(d17:0/17:1)	266.105	862.618	424.166	358.278	317.004	327.971	416.295	349.207	238.207	785.357	680.105	232.483	374.906	260.085	348.288	370.362	479.399	164.428	242.558	811.085	346.553	309.247	402.432	1383.51	431.624	816.735	621.941	620.237	580.797	353.429	457.192	422.706	436.147	445.253	458.731
558	LPC(18:1/0:0)	89.356	544.342	8995.76	9390.12	11525	13075.3	8464.87	11242	6472.81	13323.1	17421.5	8748.65	11135.5	8579.58	12775.6	10363.4	19038.9	7656.98	7702.51	25214.4	21049	14665.1	30339.2	34390.8	12541.4	36379.8	14486.2	12964.6	18540.7	16582.1	15693	14642.8	14851.1	14420.8	14735.7
559	TG(16:0/22:6/16:1)	663.037	894.748	3266.72	2944.97	3193.1	2836.61	2440.31	2146.14	1422.74	30630.4	28749.8	16022.5	21769.9	14748.2	17620.5	22769	19176	7798.13	9554.5	18651.9	17534.4	15175.8	24719	21395.1	11239	38618.2	15454.6	13116.2	23712.6	18974.2	15514.4	15526.2	15683.6	15565.7	15951.7
560	PC(O-16:2/16:1)	331.299	736.54	903.549	554.25	314.984	574.991	692.003	618.535	274.431	1819.51	2118.04	472.48	1012.47	708.059	1421.63	1164.25	1495.17	398.535	743.146	1325.14	1919.24	884.11	1157.11	3688.49	1342.85	3100.2	2510.91	1962.82	1285.31	1349.73	1624.3	1356.48	1944.76	1599.16	1149.87
561	PI(20:3/20:4)	287.903	926.568	1329.67	1286.29	1182.77	1253.85	1070.42	1022.76	746.211	1559.72	1492.94	629.764	1024.2	667.068	1177.76	1063.46	1349.73	434.691	607.494	1266.04	950.702	845.75	1258.6	2507.46	1063.43	2308.93	1333.27	1100.54	1357.42	948.674	1511.81	1358.28	1277.68	1451.16	1381.77
562	PC(P-16:0/12:0)	345.082	684.494	2020.91	2306.2	2665.01	2585.75	2002.36	1667.89	1260.3	2004.26	1525.65	929.189	1361.32	1060.39	950.082	890.798	2812.74	1391.65	1226.92	2935.97	3161.06	2802.93	3728.19	5477.42	1488.46	6343.26	2418.46	1814.58	2800.06	2990.24	939.563	1781.68	2479.23	1225.09	1325.45
563	PC(P-22:0/11:0)	460.692	732.585	43721.2	40179.9	40920.2	38357.5	32310.2	29545	23031.9	49791.6	51231.7	21502.5	36146.3	23270.1	34937.5	36098.5	51318.8	19709.8	26417.2	43044.9	50278.2	39365.6	55928.7	87093.3	34466.3	63368.4	39657.3	36904.9	50902.1	37084.2	47829.4	46119.9	47107.2	43058.9	44814.7
564	TG(18:1/18:1/20:1)	741.904	930.842	77459.6	67791.1	59460.5	54152.7	52076.1	34849.9	28317.6	93110	101834	43235.3	63310.4	43962.1	54010.1	60692.5	58906.6	27845	32069.6	56955.4	60558.3	58005.2	94370.6	70201.4	32555.2	103106	47399.2	32600.6	58422.2	48208.4	67894.8	62952.7	62946.5	66651.5	58486.3
565	PC(P-16:0/24:0)	585.199	852.674	5262.66	3205.53	3504.79	3018.24	3521.03	2252.79	1571.32	3148.58	3010.62	1314.92	2193.5	1398.81	1882.27	1738.36	2785.94	1155.58	1230.15	2324.78	3374.26	2134.6	3870.47	3796	1530.96	4158.31	1560.96	1869.2	2624.71	2564.44	2682.68	2712.77	2908.99	2725.63	2395.6
566	PE(O-16:2/22:5)	397.422	770.505	43338.4	43364.5	48685.2	46360.6	36452.6	42527.6	26564.2	83631.7	91264.4	48679.1	62306.2	45867	62753.2	62496.1	57015.7	23408.9	26464.6	47388.3	54367.8	43496.3	70737.5	162589	70175.2	153492	81107.3	69373	105498	75809.4	63933.2	64861.5	65295.1	62794.1	62257.2
567	Cer(d18:1/23:0)	575.236	636.625	2493.22	2314	2256.24	2442.12	2006.75	1834.62	1262.29	8377.83	9956.16	4387.19	6311.26	3866.86	5896.55	6355.13	10228.6	4397.19	5393.48	9024.25	11155.9	8790.35	13405.8	14060.8	6591.01	12376.3	6772.86	6718.95	9296.02	6717.96	7413.52	7294.63	7606.34	7400.08	6678.71
568	PC(O-18:2/22:6)	450.907	838.57	40294	5708.23	7960.72	7551.9	8186.57	30453.9	3770.95	32044.8	34614.3	16884.3	25795.9	16144.9	26891.2	23617.5	44358.2	16316.9	1628.92	7574.66	38445.4	30813.2	6493.72	69228	26328.4	57162.2	31912.6	28853.9	40592.9	1710.01	40026.9	36661.7	2164.22	39956.8	37521.8
569	PC(3:0/18:4)	69.153	572.331	336.496	455.483	355.329	428.969	420.006	497.319	205.651	754.349	735.023	449.079	369.978	367.561	308.439	366.273	908.922	412.851	353.721	898.271	1094.56	752.167	1692.28	857.184	333.422	626.614	266.502	244.561	452.306	363.97	734.509	734.971	668.33	609.598	583.02
570	PC(P-22:0/12:0)	457.177	746.603	9.17524e+06	8.75327e+06	8.53487e+06	8.16106e+06	7.05573e+06	6.74722e+06	4.50763e+06	7.95729e+06	8.80996e+06	3.69454e+06	5.9973e+06	3.92719e+06	6.20426e+06	5.44129e+06	6.79755e+06	2.96975e+06	3.44442e+06	6.41109e+06	7.04685e+06	5.63013e+06	8.55603e+06	1.22996e+07	5.22826e+06	1.13019e+07	6.04105e+06	5.11211e+06	8.08877e+06	5.32575e+06	7.76143e+06	7.6744e+06	7.56518e+06	7.55799e+06	8.01263e+06
571	PE(O-18:2/22:1)	537.183	784.615	12554	12250.9	11105.7	10963.5	11072.5	10952	6783.52	12152.4	13092.8	5579.44	8774.52	6111.81	9085.47	8438.04	11233.7	5540.06	5489.03	9270.72	11531.7	8531.97	13632.6	23896.8	9239.95	21649.9	10848.6	9423.23	14781.7	10473.4	12379.4	12079.5	12296.3	12101.6	11743.6
572	LacCer(d18:2/18:0)	363.923	888.633	729.045	631.198	751.663	577.258	625.48	492.371	248.737	1468.74	1579.35	801.98	796.619	961.13	630.028	1107.47	1255.42	499.548	532.62	1166.06	2053.9	1265.34	1906.4	2601.54	945.33	1549.6	796.348	660.596	1203.86	849.788	915.511	1079.36	1154.6	1017.24	937.936
573	SM(d17:0/17:1)	311.646	725.541	7572.51	5688.34	5481.15	5165.26	5398.11	4417.96	3082.03	5195.6	5973.93	2056.66	3976.06	2546.59	3645.39	3789.1	2637.9	906.844	1136.41	1849.36	1963.97	1579.53	2466.55	7165.71	3413.02	7196.74	3459.14	3158.41	5113.66	3384.34	4894.5	5344.32	5018.95	5401.35	5659.55
574	PI(18:0/20:2)	365.613	908.605	6317.96	5449.19	4392.57	5358.14	4288.36	3888.85	3251.85	7244.07	6437.85	3666.36	5727.56	3475.72	5861.47	4262.12	4870.31	1954.72	3041.36	4961.74	5128.98	4498.1	8076.76	17442.8	5682.26	11093.4	8440.75	6687.9	8503.76	6349.8	5172.72	6325.79	5609.42	5707.85	6159.64
575	TG(17:1/15:0/17:1)	715.902	834.756	2894.25	2273.61	2805.85	2748.19	2125.61	2205.38	1345.4	14417.3	15626.2	7225.94	10639.9	7060.08	8821.26	8875.95	11765.2	4777.19	7076.37	10382.8	9173.99	10787.7	16348.6	20550.9	9577.1	21258.9	11413.8	7963.67	17316.3	10709.8	11961.1	10174	10004.7	9780.7	10032.2
576	DG(26:0/16:0/0:0)	661.135	726.69	327.131	387.223	438.87	331.427	333.497	454.868	291.956	983.979	1114.13	501.379	765.17	627.5	685.373	731.467	1104.18	707.87	705.962	1295.59	1329.48	1096.41	1954.49	5214.8	2384.12	6258.62	2693.4	2061.15	3220.3	2955.78	1764.11	1700.57	1787.96	1510.11	1564.36
577	PC(26:2/14:1)	481.911	862.623	15387.6	13518.1	13133	11973.5	12412.3	11482.1	7507.97	6786.1	7901.78	3569.08	5584.89	3651.28	5457.19	5325.44	8756.67	3305.86	3885.45	7471.04	8117.27	6081.67	11256.5	11941.8	4968.92	11048	6078.01	5699.05	6899.68	5411.19	8262.16	9033.44	8270.55	8934.82	9394.57
578	TG(20:2/16:1/20:2)	783.98	926.815	1589.21	1186.68	1366.14	1316	1120.3	1204.49	1673.94	2336.05	2554.31	1299.35	1593.23	1333.4	1650.35	1635.07	2426.05	1168.04	1264.63	2537.26	2580.07	2294.45	3439.04	4901.9	1986.92	5618.44	2937.26	1980.23	3560.7	2946.19	2352.49	2114.52	2160.93	2354.19	2078.09
579	PE(P-22:0/10:0)	451.092	698.504	4318.01	3989.2	4524.05	4694.3	3684.53	3593.52	2308.93	14588.2	17354	7801.54	10155	7697.97	10611.2	11189.8	9462.85	3943.66	4771.02	7895.59	11102.1	7905.33	14610.4	33086.3	13720.4	29690	17471.5	15460.1	20718.6	15667.8	13751.2	12340.6	11813.9	12220.7	13749.6
580	PC(O-22:2/10:0)	401.416	716.554	1.31906e+06	1.15426e+06	1.07445e+06	1.05768e+06	989403	996103	648926	1.10536e+06	1.17888e+06	475031	776662	495240	796686	736011	648341	260070	314708	553171	604073	470755	737857	1.1507e+06	486954	1.12875e+06	603789	469470	771399	530829	945462	936798	920185	922242	962931
581	PC(O-22:2/13:0)	472.111	758.599	87433.7	82029.6	77509.2	59073.7	65784.2	54980.6	42434.3	61278.9	47564.8	21552.5	45350	30786	47137.4	44658.2	55824.8	24191	29491.9	50899.2	57634.7	45304.5	40826	96428.8	38642	84237.9	46541.5	29460.5	45181.9	46219.4	64111.8	65468.6	46657.9	49338.5	64120.4
582	PI(18:0/18:2)	305.286	880.574	1359.49	1179.24	1133.63	1145.35	917.757	964.852	750.733	1326.62	1415.25	579.757	941.848	632.948	1062.59	917.891	1540.69	617.377	755.3	1274.38	1099.61	1115.71	1801.06	2663.78	1042.16	2080.5	1460.6	1067.71	1644.19	1003.73	1373.59	1417.85	1414.42	1436.61	1343.79
583	PC(P-22:0/13:0)	480.801	760.614	132756	162007	109863	90538.8	33498	110809	23198.8	76416.9	109117	33319.7	74102.2	42309.5	68159.7	52102.7	74294.3	33465.7	31535.7	60976.6	73955	55550	74151.7	101699	47724.4	116923	55714.8	47219.9	108497	66276	83972.5	85276.1	92678.3	79757.4	89314.7
584	PC(18:4/24:1)	515.213	864.639	17145.5	16363.4	16585.3	14685.3	13710.5	12679	9361.23	11474.2	12166.4	5185.06	8429.33	5917.43	9163.21	8110.47	13335.1	5118.38	6645.55	12484.3	13194.7	10003.2	15251.2	23078.8	9355.98	20897.7	10643.2	9637.48	14091.5	10211.9	13545.2	11544.7	13180.8	13884.2	12812.8
585	DG(16:1/22:6/0:0)	424.054	656.519	1417.05	1179.18	1029.09	1077.52	854.456	1429.42	815.053	3340.03	6057.75	1797.14	2386.33	1763.41	1644.26	1901.34	6923.92	2972.8	3189.28	5101.78	5527.3	5737.23	10882.3	12119.4	5333.85	8388.34	5835.84	4489.21	8273.43	4875.75	3383.52	2507.38	3812.5	4349.25	3670.14
586	PC(20:4/26:2)	553.148	918.685	2605.07	2365.52	2840.49	2470.46	2243.65	2314.52	1595.69	1607.3	1422.29	695.031	902.434	583.383	865.077	1057.5	1792.16	663.109	988.011	1661.14	1636.9	1371.09	2570.62	3083.51	1221.08	2986.07	1338.69	1287.92	1587.28	1282.16	1677.17	1615.89	1953.66	1568.75	2654.04
587	PC(O-22:2/11:0)	424.555	730.568	68107.9	74216.3	79635.2	78891.2	61400.8	63202.5	38463.8	60899.7	70753	29455.3	42319.8	31049.2	47957.2	45583.4	65245.8	25297.7	28478.6	51140.2	56358.6	44060.3	176589	117335	44308.6	106170	45515.8	42619.2	77333.9	43902.6	54741.7	55205.7	54998.1	58561.6	57712.3
588	DG(16:0/22:5/0:0)	479.345	660.551	14647.5	13613.6	11824.2	11785.6	11605.8	10612.2	7796.93	22527.5	21580.6	8712.51	15459.6	8959.03	13392.6	12553.3	33864.3	14680.5	16618.2	25598	26776.3	24642.8	37081	61003	26520.8	10893.3	26636.2	5003.41	44675.5	6009.53	22183	22469.8	23165.5	22644.8	23567.3
589	PC(O-16:2/22:5)	386.802	812.549	12426	13564.4	18325.9	19149.1	12309.4	18020.7	8374.56	19468.5	22675.4	13429	18172.9	11285.2	12886.2	11596	20844.8	9819.18	7701.27	17666.4	21999.8	18001.6	27213.3	25341.3	11290.8	26994.7	12156.6	10876.8	19131.5	16737.8	14087.6	13647.2	13953.5	12950.7	12065.4
590	PS(20:1/20:4)	339.434	838.547	67794.1	60434.5	52119.5	61608.2	55769.7	49101.4	38736	148350	185657	74860	113294	76753.2	127132	112021	153677	48442.4	74125.4	151918	109032	110494	144673	329006	128383	248289	169278	134786	193933	118275	118972	123629	125647	121951	114249
591	TG(16:1/16:0/17:0)	673.176	836.753	958.898	900.214	862.235	1015.53	729.015	683.619	455.184	6470.19	5903.22	2865.14	4011.44	2825.51	3171.14	3641.59	3652.73	1700.99	1773.86	3020.57	3360.14	2997.45	4253.55	8212.55	4063.86	10472.4	4855.49	3437.56	5696.79	4681.98	3867.71	4012.78	4039.01	3997.72	4162.46
592	PC(O-20:2/14:1)	409.887	742.564	330248	489475	467990	447052	443787	377411	273792	389005	451663	194869	300598	204326	308570	281876	315006	137688	159722	282026	295230	238635	391479	394778	179278	486868	203930	207414	329106	230563	377579	364789	379903	372778	392263
593	TG(22:5/15:1/22:5)	689.97	956.781	5551.37	5334.59	6453.08	5909.79	4428.49	4503.24	2749.07	7665.68	7987.16	4388.19	6590.74	4274.04	5917.33	6133.98	10343.7	4308.02	4910.01	9324.56	10716.1	7960.26	14585.9	9476.16	4245.76	13937.7	4811.98	4259.82	6584.97	5194.23	5692.69	6260.94	5813.57	5998.98	6071.49
594	TG(16:0/16:0/20:5)	673.829	870.748	4389.12	3995.22	4187.94	4616.51	3844.36	3482.95	2224.98	56658.2	48236.1	29946.5	39200.8	26011.1	29048.3	40119	37971.2	16047.4	18674.6	34326.4	32817.2	30612.5	47988.8	48561.8	23702	74354.2	30070	25783.9	42706.6	38031.2	29831.3	30957.2	28680.6	29401.1	29102.7
595	PC(O-22:2/12:0)	449.296	744.586	2.44176e+06	2.37746e+06	2.25156e+06	2.09493e+06	1.86646e+06	1.8397e+06	1.2293e+06	1.81434e+06	1.90665e+06	877185	1.34912e+06	876645	1.38312e+06	1.2097e+06	1.36178e+06	582672	706028	1.22541e+06	1.33032e+06	1.01801e+06	1.57883e+06	2.64623e+06	1.02655e+06	2.47621e+06	1.27177e+06	1.08912e+06	1.77969e+06	1.22972e+06	1.87669e+06	1.78108e+06	1.85751e+06	1.84499e+06	1.80464e+06
596	PC(18:3/22:6)	313.766	828.538	1606.37	1332.5	1341.82	1232.43	1248.56	1138.17	808.489	1719.41	2227.52	879.417	1564.6	861.246	1325.2	1337.17	1811.64	700.111	1040.6	1563.04	1751.48	1416.02	2151.33	3568.69	1251.69	2630.67	1491.29	1887.79	1925.4	1567.76	1721.44	1636.67	1770.88	1709.35	1888.83
597	PC(P-22:0/15:1)	488.252	786.63	25516.5	21649.2	19588.9	22917.3	10430.2	15249.8	10892.9	17313	20463.1	7711.57	13802.8	8119.69	10911	12488.7	12685.3	5641.57	5958.53	13257	13403.2	9576.46	16851.6	23080.1	9941.16	21981.9	11551.2	9041.48	15847.7	10462.9	17114.5	17264.2	17208.2	16986.6	17251.9
598	PC(O-20:2/15:1)	428.686	756.582	24367.2	40819.2	38319	34426.2	25010.4	38215.5	14819.8	28312.4	377.722	2203.86	18993.8	4262.6	7526.42	9329.17	27587.4	15038.1	12448.9	12406.7	7145.58	55070.5	32903.1	16118.6	126.425	27557.4	0	18083.7	13213.3	18684.2	11367.4	20827.5	8140.7	0	9745.7
599	LPE(P-16:0/0:0)	94.377	460.276	390.521	349.129	388.999	444.688	353.88	426.692	233.57	1188.11	1448.01	619.613	852.444	575.826	702.983	824.73	812.801	349.225	422.889	910.033	998.335	736.468	1147.23	4635.65	1541.79	3357.66	1673.15	1499.32	2335.29	1545.4	1149.3	1032.66	1094.54	1116.9	1157.1
600	PC(18:2/20:5)	406.276	804.572	36352.9	32682.4	33745.3	29928.7	29738.7	26773.1	17894.7	28663.4	32219	13808.6	22409	14468.5	21107.7	18898.7	23252.1	9192.1	10885.5	36217.7	19433.8	18128.5	25923	48992.6	20948.5	45942.4	24981.1	21330.1	55543.6	21704.8	34114.6	28616.4	28850.3	27244.4	29931.9
601	TG(16:0/22:6/18:1)	729.863	922.785	9578.08	9782.9	9746.28	8887.72	7119.16	6370.53	4180.09	8450.07	9131.63	4955.27	6190.08	4787.14	5783.2	5803.63	7264.81	3431.71	3486.51	6970.6	7932.8	6153.71	11770.3	9319.76	4008.84	14487.3	5287.22	3674.62	7058.74	5599.8	7206.9	6731.57	6793.77	7303.04	7381.65
602	PE(P-18:0/14:1)	409.893	696.488	9898.89	10285.7	11625.7	10927.1	11663.6	12650.5	8078.7	24593.1	27148.1	12456	17888.1	13290.3	17629.9	16090.8	19584.9	8349.6	9625.74	18228.6	21657.7	17423.2	28302.7	55352.7	22492.2	56763	26814.7	19286.7	33165.7	23604.7	20870.1	19416.1	18456.1	18856.7	18280.7
603	PS(20:1/20:3)	358.983	840.559	14458.7	13935.1	15216.8	10100.6	11545.3	7582.78	7910.14	14844.5	9423.54	5813.69	7811.85	7595.94	10626	11374.3	11979.7	5208.01	3369.38	9655.09	11279.4	6138.42	11881	23232.5	8049.35	15163.6	13687.7	8936.32	12947.8	7676.93	15324.6	13797.1	9784.77	12958.1	12870
604	GlcCer(d18:1/26:0)	580.225	840.723	403.511	355.181	243.225	275.723	338.043	189.119	141.189	559.211	796.071	415.142	521.183	295.857	514.209	504.837	781.169	415.933	411.683	857.4	971.138	798.794	1073.58	760.821	502.78	928.497	634.193	545.821	924.077	681.107	532.676	514.91	655.089	486.735	475.588
605	PS(21:0/18:3)	471.221	828.57	7066.64	10295.4	8400.62	10269.6	6829.88	8593.9	5253.36	14754.5	13415.6	7741.85	10850.4	8378.91	11375	10195.7	33074.4	8279.71	11440.2	18427.1	28085.4	16492.3	27847	30983.2	13665.3	27634.2	13353.6	12433.3	17612.6	13209.4	14123.4	12538.3	10719.6	11896.8	10708.2
606	PE(O-22:2/14:1)	469.663	750.554	177582	236202	271166	317828	213172	296375	157445	284300	329434	192967	210471	170842	225504	171702	387876	151525	154639	408725	445275	319176	721500	633685	276077	729407	275851	208142	431926	342487	301148	282971	294917	273905	270465
607	PC(P-22:0/14:1)	495.458	772.617	399299	359429	348619	322021	284948	214094	183949	192083	218500	86929.8	153841	94115.7	142392	137664	156255	64402	78592.6	131731	145338	116441	177857	272868	114075	241957	132757	115322	173926	121748	235337	230862	238437	233507	239667
608	PC(O-22:2/14:1)	452.449	770.599	621400	609487	626370	595112	483846	514317	333321	461077	478512	224856	343921	214432	376983	313975	392180	255636	198597	362313	777098	303584	790563	636667	253257	616606	313104	252488	689052	298304	444145	427527	410112	418910	438316
609	GlcCer(d18:1/16:0)	381.611	700.567	16070.7	12456.6	17049.2	13561.5	11724.5	10912.6	7227.81	144967	203475	83251	118146	78419.5	102685	111098	142879	64809.1	74357	135893	182092	138009	194012	162575	66944.4	133126	73577.7	77527.9	104018	77434.2	97362.3	95042.6	90315.9	95873	93315.5
610	TG(16:0/22:6/16:0)	681.887	896.765	12624.7	3678.1	4271.59	3900.59	9325.09	8377.7	1995.28	87569.5	77661.9	47146.6	61738.2	40157.5	46939.1	60309.6	73581	30740.7	32881.7	62263.3	62522.5	59916.2	80712	138172	72144	178314	75368.3	74016.3	116442	102148	62746.1	61817.9	60476.9	64315	62174.2
611	PC(P-22:0/14:0)	535.443	774.631	84170	69640.6	56004.1	59936.5	52933.7	44792	20112.1	64601.2	79754.1	31290.4	49950.1	33998.8	56410.4	48817.2	68970	31267	31061.2	63393.7	59068	53598.6	79688.6	100478	44175.4	103670	52471.1	46662.7	72553.9	47897.8	62702.4	69084.5	77437.4	80764.8	79063.9
612	TG(16:0/22:5/20:1)	784.769	952.831	2070.11	1759.88	1794.27	1840.85	1464.49	1392.29	969.636	2118.58	2377.27	1080.83	1313.72	1276.78	1435.59	1329.76	2211.57	946.064	994.777	2033.15	2270.64	1889.21	3203.13	4428.02	1648.9	5296.87	2091.98	1552.28	2970.35	2522.16	2013.21	1924.95	2083.98	2030.42	1942.24
613	PE(O-16:2/20:3)	411.601	746.506	43441.4	44381.4	52128.3	55624.9	43851.6	49962.4	30571.6	79635.3	76292.5	41329.9	56928.8	41864.8	60321.3	57341.4	72190.4	28934.5	32429.3	60223.7	73427.4	56026.8	95887	162702	66291.8	133003	72543.1	62453.2	93771.8	71755.9	68404.4	62221.5	59259.2	63231.6	58872.3
614	PC(O-16:2/15:1)	302.363	700.524	737.139	638.978	594.728	1221.32	566.268	572.584	279.238	1103.21	1158.14	479.227	859.653	489.413	530.492	585.003	697.636	250.09	315.426	784.343	560.388	485.614	739.526	1353.5	617.13	1307.49	569.552	771.008	922.459	646.531	1089.94	610.091	568.418	911.377	979.505
615	PC(P-22:0/15:0)	527.084	788.648	20941.1	11385.2	11588.9	15615.6	11120.8	8354.92	6359.73	10812.1	14283.4	5618.27	9229.62	5927.16	5693.72	9230.44	12866.2	4626.68	4922.88	10040.3	9894.17	8371.32	13984.3	19898.1	8510.31	16782.9	8271.39	8310.91	11783.1	7978.58	11188	12627.6	12363.5	12342	11562.1
616	PC(P-22:0/18:3)	528.048	824.663	9756.43	7221.81	8129.43	6893.13	8482.34	6397.32	4600.36	7697.47	9752.95	3675.73	5595.16	4186.48	4404.79	5750.92	5703.46	2784.08	2996.76	5492.31	5178.38	4936.54	7456.67	14129.4	5290.36	11785.9	5212.27	5956.46	8297.64	6224.34	7834.64	7395.08	7376.73	7665.53	8260.65
617	TG(16:0/20:4/16:1)	646.357	870.744	636.538	588.752	660.264	655.278	654.331	541.473	339.952	2040.14	2116.96	1054.54	1410.75	4891.2	1040.05	7386.65	1649.19	717.771	683.972	5992.14	1531.07	1209.88	2241.04	13421.6	6708.92	14178.1	6917.71	7520.48	11121.9	8115.14	8483.08	3919.44	3539.16	8373.8	4816.81
618	PC(P-22:0/18:0)	584.096	830.691	20102.4	17103	17350.2	11849.2	15152.6	12517.9	8967.63	13434.8	13173.3	5410.96	8680.73	6569.13	6927.22	9210.34	13684.5	4323.9	5377.54	9982.58	11347.2	11300.2	18148.8	15445.2	6500.62	12243.5	7153.12	9222.11	9439.98	6940.21	14615.1	14893.6	15175.8	9901.87	11375.2
619	PC(P-22:0/18:2)	538.883	826.661	11939.5	10502	10976.3	9782.17	8502.82	8468.4	5484.57	8348.39	8844.59	3187.58	6123.93	4311.35	5019.06	6004.07	7995.41	3380.21	2638.87	7057.63	7978.78	5236.34	9782.5	12679.1	5637.2	11440.3	6283.62	5841.84	8161.84	6131.06	8126.37	8602.75	8674.86	8895.49	9926.36
620	PE(P-16:0/14:0)	339.278	648.506	423.651	656.013	823.044	523.059	434.799	380.426	292.222	475.228	857.037	330.496	463.099	220.739	407.477	415.723	803.791	338.517	308.322	752.539	790.766	515.639	991.481	1759.98	616.675	785.474	376.464	468.211	827.772	678.079	691.474	494.335	529.524	681.023	919.542
621	PC(P-16:0/18:3)	409.1	740.552	263651	290728	347886	346593	263761	343565	193011	377921	376063	192957	251962	196539	279777	235941	434014	168041	179698	403952	430329	353831	582472	660659	297992	694173	308153	254223	396902	307092	320113	288313	302617	278244	270995
622	PC(P-22:0/16:1)	536.994	800.647	23475.6	20579.1	20313.6	17992.3	15980.1	14919.9	10109.5	14753.4	15692	6627.65	10530.5	7041.75	10328.6	9910.51	12050.6	5314.4	5993.67	10971.5	12540.1	10071.8	15220.1	23465.6	9815.39	20387.3	10476.3	9106.67	13805.3	10124.6	15322.8	15412.9	15440.3	15618.1	15535.4
623	PC(O-20:2/16:1)	519.548	770.599	11265	9460.01	10985.8	9539.26	10162.3	10603.8	7945.62	10544.8	11944	4980.44	7838.29	5209.46	6969.26	8653.32	9667.12	4569.29	4890.88	8794.5	12088	8617.18	12209.1	19538.3	7588.4	15953	8364.92	8243.91	11022	8474.24	12350.6	10855.7	10775.9	10461.2	11010.1
624	PC(O-22:2/16:1)	502.293	798.629	69719.6	61728	60239.6	52233.5	46791	42985.3	31040.4	40254.3	42121.8	18747.5	29522.9	20362.3	31161.2	30554.6	35830.7	15320.8	16793	29422.9	32870.1	25638.1	42610.1	60614.7	24088.7	52776.3	29148.2	27003.4	38101	28304.5	45735.4	46520.9	44463.6	44620.1	43076.4
625	GlcCer(d17:1/24:1)	494.575	796.658	28.2605	22.8893	36.0382	47.426	37.0121	43.2945	17.4607	1902.01	2745.88	1104.12	1289.88	1060.86	1381.78	1704.03	2156.55	984.235	1190.45	2235.7	3204.02	2494.55	2949.63	3508.19	1201.2	2356.52	1213.45	1216.33	2320.07	1577.6	1211.61	1205.57	665.802	490.851	7.23163
626	PC(P-22:0/16:0)	546.815	802.663	86101.7	72670.6	69734.1	58830.1	57220.3	47191.5	48251.5	51217.6	100847	26275.8	42581	28328	39495.3	41685	55711.7	24557.4	36795.4	49324.8	61642.1	47146.6	69322.3	82923.7	32342.9	79793.3	38558	36515.8	50555.5	37681.4	56843.5	88599.3	61603.5	61844	62762.6
627	TG(18:1/22:6/18:1)	733.328	948.8	1953.05	2090.3	2495.78	4095.95	1787.79	1790.68	1114.97	2679.05	2619.92	1412.13	1784.65	1310.47	1788.28	1616.49	2588.45	1084.31	1353.96	2394.67	2657.11	2239.5	3889.83	4156.37	1700.22	4728.36	2217.71	1285.49	2417.11	1309.27	2086.1	822.805	1933.53	2169.99	1534.82
628	PC(18:2/22:4)	385.449	834.595	299369	281182	275167	273218	246479	249473	176682	196134	210807	106967	152530	105213	171545	147199	309032	118517	144441	386047	285472	213721	346929	347883	151352	306935	172642	150443	240431	156195	250451	241830	243561	245229	247151
629	LPE(16:0/0:0)	84.089	454.289	1323.13	1350.91	1313.61	1530.34	1427.32	1303.11	845.643	5675.42	8885.19	2864.58	4619.46	2767.68	3982.95	4293.51	5715.76	2612.95	2904.22	7142.42	5542.07	5171.88	6919.11	27230.8	8968.32	18547.2	10714.1	8147.37	13155.6	8277.01	6344.05	6549.33	6567.36	6345.12	6283.98
630	TG(20:1/18:0/20:1)	770.468	960.882	3558.02	3147.51	3591.97	3289.77	2838.68	2246.17	1617.48	4221.74	4723.04	1989.59	2909.09	2197.02	2631.79	2848.23	3635.33	1840.04	1934.25	4261.42	3955.34	3536.27	5818.79	5872.92	2409.78	7698.09	3636.35	2299.8	4552.69	3429.13	3863.12	3488.49	3383.99	3716.31	3236.29
631	Cer(d17:1/24:1)	541.133	634.608	3972.29	4013.82	2725.37	3549.41	2576.45	2284.28	1569.05	12822.4	10866.7	4832.93	7297.9	4227.92	6576.3	7355.46	13264.6	4916.91	5209.09	8399.42	12694.3	11357.4	12886.1	19185.9	8790.12	12909.1	7559.89	7769.15	11378.7	8776.02	7800.88	9570.1	7766.66	8465.8	8192.09
632	PC(O-18:2/2:0)	88.093	548.366	276.117	293.628	309.798	354.496	336.757	368.05	196.805	908.909	1383.05	491.874	659.366	458.24	617.128	617.489	1520.8	783.293	599.212	1443.29	1510.11	1338.75	2097.72	2522.66	865.932	1991.92	805.659	899.055	1275.11	898.673	830.03	840.841	870.334	839.336	818.038
633	PC(O-20:2/17:2)	463.306	782.614	7533.73	6627.31	4494.95	7436.79	7732.6	5131.3	4661.81	12126.4	15778.7	7041.89	8626.78	6249.5	7843.96	7815.3	6809.59	3147.72	5443.15	5307.61	5690.71	5114.33	14971	15608.2	7413.52	10004.5	5253.04	6603.19	12816.3	7460.45	8911.98	9464.5	10692.6	10261	9128.49
634	PC(O-16:2/17:2)	311.155	726.543	1187.84	970.232	999.116	933.29	831.592	675.053	540.053	926.982	992.435	301.493	703.943	415.006	605.019	593.311	561.055	174.217	192.741	601.579	425	314.936	544.268	1654.7	497.647	1355.72	530.45	762.66	1078.16	603.071	802.788	889.656	833.895	937.415	1146.99
635	PC(O-18:2/17:2)	414.176	754.584	14443.3	18010.5	16358.5	19086.6	16956.7	19888.2	9529.43	18910	20989.7	11491.9	11570.2	12229.3	11709.3	12649.9	18159.5	8223.76	6619.85	17234.9	15141.5	13798.1	21213	30162.1	13744.9	24325.2	12447.1	9685.48	15306.9	14845	13471.6	9779.7	11386.6	14380.4	12162.1
636	PC(P-22:0/17:0)	547.999	816.7	246101	179651	188046	170060	213670	159302	123141	166213	206738	81567.5	124842	81389	97195.5	126901	124605	54436.7	57372.2	106577	108325	104784	149511	258191	112633	208987	111640	109461	157970	188852	194951	184399	188891	194128	192421
637	SM(d18:0/18:0)	414.118	733.606	43867.8	29969	44583.2	39827.5	41714.6	36763.6	22149.1	70237.6	76820.4	34101.4	53473.5	40090.4	42423	47974.3	47474.8	17746	23650.1	42165.3	37277.7	33871.7	60916.3	89919.1	33183	74981	41646.6	34272.8	67369.1	41076.1	41357	50917.5	54570.6	51814.2	51538.1
638	PC(17:0/20:1)	451.081	802.618	50154.8	37498	40526.1	37675.5	35652.7	34174.8	23497.7	24963.6	26542.9	16443.3	17861.9	13071.3	17160.2	18498.3	27889.6	14833.2	13038.3	22629.7	24741	22169.6	32690.3	50534.2	16566.8	42905.2	22760.7	18568.6	28176.5	20527.4	31438.2	30953.7	36872.8	40914.5	30704.1
639	PC(P-18:0/18:4)	470.249	766.575	41351.4	46059.2	50189.2	52359.7	38890.6	48528.6	28750.1	38424.2	38366.5	31199.2	25642.1	29251.9	27455.8	21635.5	40511.7	23750.2	18002.2	45124.9	56769.4	35211.3	76071.7	99820.1	30898.9	107609	30985.5	25189.5	46550.5	49025.6	34895.4	32976.5	36347.5	50143.2	50269.8
640	PC(P-16:0/18:4)	322.084	738.556	1348.49	1209.91	1238.91	1291.13	1169.44	1184.67	651.263	2096.94	1992.65	728.84	1621.7	804.152	1130.36	1365.45	1621.82	680.996	771.806	1733.66	1354.4	1332.14	1704.72	3522.47	1463.75	2728.95	1015.64	1194.27	2107.64	1389.98	1396.53	1657.58	1815.23	1738.26	1839.35
641	PC(O-18:2/18:4)	406.309	764.55	49519	44840.5	55577.8	55705.3	42484.7	52179.7	5564.96	44329.2	41755.5	24005.8	26957.9	23137.3	25282.1	27943.4	49936.6	20388.2	22134.1	43988.5	45315.9	37568.1	60509	61030.7	24896.7	61256.9	32967.3	25944.7	39544.7	29756.5	43536.4	40905.9	40972.8	36648.4	38427.9
642	PC(O-16:2/18:4)	279.103	736.541	352.484	399.078	452.388	354.633	369.768	403.296	277.005	487.677	529.152	209.659	344.203	243.933	394.94	371.641	503.209	182.87	227.027	475.605	464.275	391.393	621.766	3522.83	1299.27	2808.22	1483.6	1425.27	2131.82	1520.48	1142.48	735.167	675.061	755.752	774.557
643	PC(O-18:2/18:3)	401.566	766.566	228467	199140	210741	217752	191549	215431	143394	437209	426933	194703	268271	393891	234405	443703	226518	75553.2	129728	158170	198995	169611	254900	213012	89849.9	175000	99208.4	96423	146517	105753	279334	229510	228240	235312	219634
644	PC(P-18:0/18:3)	492.366	768.583	27639	22526.9	22926.2	19447.2	19265.3	13412.8	10465.5	55251.5	21700.6	8991.34	14014.1	16845.4	12165.8	13900.2	16175.8	13545.2	7632.6	49106.2	34245.5	12779	20550.3	93717.2	12719.6	26860	15329.2	14952.3	19455.6	15087.7	20187.8	19435.5	33755.9	20520.6	20999.7
645	TG(17:0/20:4/18:1)	741.495	912.793	5274.34	4406.88	5559.55	4641.68	4074.59	4154.21	2641.29	11321.4	13303.5	5214.75	8424.86	5333.8	6964.95	7777.12	10775.6	4376.48	5184.98	9625.35	10071.9	9518.74	15622.2	9453	3214.44	16187.2	7202.56	5744.51	9501.89	6792.05	7408.45	6962.93	7297.13	7384.5	6754.38
646	PC(O-20:2/18:2)	459.56	796.615	92244.8	90366.9	92267.5	89816.3	80211.7	60857	44452	118907	121964	61281.5	89185.5	104220	91576.6	85081.2	101601	39988	46310.8	86722.4	102866	78120.8	109684	133655	52363.9	107368	54184.7	54368.1	89886.5	56976.6	90666.9	85950.3	94857	90451.2	96915.8
647	PC(P-22:0/18:1)	575.391	828.677	5130.36	7044.9	7198.53	4329.43	4001.46	3580.49	2627.67	4283.44	4696.63	2153.9	2988.46	2202.78	2915.09	2739.77	4108.77	1788.69	2219.98	3769.59	4150.63	3144.63	4859.94	7476.82	3292.46	7327.31	3302.27	3214.13	4763.55	3875.48	4301.98	6358.33	4365.59	4358.53	4413.81
648	PS(18:2/18:2)	279.407	784.499	384.11	392.209	379.835	441.559	349.455	426.776	262.029	805.264	831.282	390.227	583.907	484.433	649.065	676.729	831.47	343.21	410.789	823.539	751.814	633.132	1109.91	1762.32	775.5	1670.36	1060.68	944.412	1167.21	858.533	868.809	757.859	833.692	718.624	813.023
649	PC(O-22:2/18:0)	545.869	828.678	28314	24853.6	27232.6	12543.1	14359.7	15111.4	10453	14529.9	20662.9	7859.25	9715.51	10750.9	14704.1	12189	18514.3	12222.6	7853.47	22914.7	18361.9	17229.2	20390.3	56548	21202.5	16300.7	21209.3	22129.5	33792	7804.47	11856.9	19376.7	11005	36080.8	32629.4
650	PC(O-18:2/18:2)	411.559	768.586	897695	823348	875544	881522	675821	644313	473322	1.82272e+06	1.69411e+06	961973	1.309e+06	855434	1.25014e+06	1.21502e+06	1.15609e+06	490651	551751	951097	1.1137e+06	888668	1.4039e+06	1.30114e+06	522315	1.08163e+06	567540	537492	863189	599778	1.07752e+06	985267	1.06259e+06	1.03224e+06	1.05351e+06
651	PC(P-22:0/21:0)	643.604	872.733	718.293	635.162	677.337	763.593	660.486	563.613	404.238	2253.67	2492.52	1331.67	1576.86	1109.98	1521.19	1732.42	2506.04	1164.56	1442.37	2362.17	2420.97	2743.83	3295.36	7576.27	3594.2	9595.24	4776.81	4001.25	5523.16	4652.88	2976.38	2795.79	2848.09	2946.04	3631.3
652	SM(d22:2/12:0)	381.593	701.569	7958.79	7136.03	8031.56	7307.51	7227.99	5594.03	3863.93	61919.1	89348.6	37263.4	58165.2	33613.6	50525.6	52280.1	63278.9	29221.5	29635.6	65714.2	83624.8	57747.7	82248.7	71325.6	31091.3	64168.3	35225.9	33571	47495	35912.5	45054.6	43377.6	42477.4	44736	42490.4
653	DG(17:1/16:1/0:0)	460.691	596.52	2440.01	2338.45	2195.63	2321.5	2315.48	2611.06	1412.81	3957.9	5144.96	1393.55	2340.29	1820.29	1665.14	2205.31	3622.69	1584.35	1726.27	3324.34	3379.39	3035.93	4979.26	7583.26	3726.59	6572.8	3877.64	2396.99	5147.01	2940.06	3536.99	2748.32	3014.12	4052.07	3827.25
654	LPC(O-18:1/0:0)	129.951	508.372	3039.08	2858.13	2818.54	2911.5	2426.98	2166.45	1591.22	5175.09	5751.23	2183.17	3683.75	2318.4	3632.33	3694.84	5033.22	1829.36	2281.09	4939.22	3856.94	3952.22	5570.35	5704.27	2082.05	4587.68	2345.36	2265.27	3226.99	2278.51	3581.81	3470.46	3663	3601.91	3595.96
655	GlcCer(d18:2/18:0)	389.743	726.581	1041.61	1289.92	988.523	1264.67	576.239	620.588	344.616	10057.2	11245.8	6077.32	8580.13	5987.57	8867.42	8532.42	6972.01	3067.64	3477.54	6404.96	8315.72	6290.76	8409.72	11008.8	4359.45	10341.3	5439.03	6294.24	8522.26	3705	6325.03	6064.01	5668.3	10389.3	4047
656	PC(P-22:0/20:2)	574.302	854.692	7494.35	4003	6106.1	3260.19	3259.51	3047.71	3884.81	2074.97	2363.13	1328.52	2177.75	1522.92	2185.88	2077.44	3065.29	1227.7	1378.26	2562.57	3071.96	2232.11	3943	5288.04	2233.83	5111.64	895.954	1812.37	3249.46	5714.26	3119.04	3269.76	3118.87	3116.63	3094.82
657	PC(P-22:0/20:1)	583.236	856.708	6901.05	6553.66	6095.06	5539.8	5339.31	6231.39	3842.13	5047.47	5568.36	2467.3	3718.28	2298.61	3589.4	3649.02	4966.74	2207.37	2796.75	4340.6	5165.55	3573.36	5985.64	9152.75	3564.08	9072.29	4551.99	4311.69	6486.12	3875.75	5813.77	4928.02	5414.34	6711.61	5435.37
658	DG(16:0/18:1/0:0)	516.643	612.554	692472	657517	488873	542414	556523	498377	356815	1.03681e+06	1.07701e+06	425449	733263	459420	684506	656628	1.4778e+06	689054	765002	1.33335e+06	1.53192e+06	1.25396e+06	1.9284e+06	2.12167e+06	870876	1.57873e+06	971979	778345	1.29099e+06	806080	1.00993e+06	1.00619e+06	939898	956017	1.01047e+06
659	PC(P-22:0/20:0)	619.791	858.723	2992.61	2668.14	3012.18	3562.53	2308.74	1990.65	1478.47	2159.21	2309.94	1234.73	1527.22	1064.57	1305.04	1570.84	2068.83	881.462	884.801	1984.31	2054.98	2470.34	2608.78	4076.98	1637.34	4232.02	2084.66	1835.95	2341.4	1849.9	2659.31	2299.8	2430.46	2343.41	2328.34
660	PC(3:0/20:5)	71.217	598.345	281.85	298.342	282.783	323.743	289.813	417.095	176.613	477.717	470.157	283.852	338.408	231.045	225.495	247.905	726.253	255.139	258.069	700.684	532.046	475.562	778.574	1251.48	423.152	699.026	324.347	299.952	535.63	381.758	449.05	397.848	461.807	461.274	398.881
661	PC(16:1/24:1)	514.845	842.657	105807	91954.6	86143.1	78483.3	77614	71578.7	51810.7	89109.3	94669.7	39610.5	69574.1	42136.2	73858.1	65390.6	112937	46335	52591.3	99705.9	101384	85044.4	129305	174015	76395.5	151606	84760.3	74099	108059	71694.1	107527	102090	101959	105098	106329
662	SM(d18:0/22:1)	469.596	787.654	16203.2	27911.6	16524.3	12001	11219.5	20296.8	10811.3	31629.4	37602.6	15505.6	24134.6	16284.4	17463.1	20498	25033.1	10632.2	15518.2	20921.3	22561.6	42575.5	28416.6	43962.7	19815.8	36442.3	19489.8	18699.4	28864.4	16511.5	24460.3	64037.6	34687.7	25749.2	24986.5
663	LacCer(d17:0/18:0)	350.711	878.639	923.358	864.932	930.046	1016.8	799.539	966.756	677.59	1644.23	1553.5	860.985	1078.18	820.235	1234.8	1134.9	2551.69	1072.26	1281.69	1882.82	2122.02	1803.11	2546.96	4880.8	2012.9	4380.3	2402.35	2252.28	4883.01	2341.96	1881.31	1847.71	1187.04	1973.06	1923.5
664	LPE(34:0/0:0)	499.969	706.569	4328.08	3319.29	3890.45	3323.3	4147.28	2693.37	2408.77	16229.5	18308.6	9518.66	12636.7	8884.64	12012.6	15973.5	30771.1	13175	17144.7	26527	31615.2	26181.9	41824.5	49628.5	21498	54583.8	34320.4	32903.2	37213.6	30056.2	25241.1	23201.9	23606	22957.5	22667.8
665	LPE(32:0/0:0)	457.294	678.538	8741.71	11149.2	9292.3	12020	16533.9	9245.86	7608.61	65405.9	87807.5	41445.6	52260.5	34000.7	48381	63931	136269	58808.6	77136	114750	160071	119160	189249	237748	103511	239773	146047	149735	171530	134524	99910.3	98188.6	94886.7	97811.5	102018
666	PC(16:0/17:1)	355.733	746.554	27919.6	25679.4	24695.8	23814.2	23243.2	21892.7	15898.1	20402.1	24004.8	9379.1	16636.6	9915.34	14957.7	16442.5	15470	6067.29	7390.7	14184.1	12612.7	12135.4	16603.5	29106.5	10896.7	20022.8	12019.8	11191.6	19007.2	12018	21783.3	20155.6	20706.9	21818.3	19252
667	LPE(22:5/0:0)	70.463	528.304	524.4	547.367	751.515	1003.83	446.561	977.244	360.916	1256.74	1244.21	550.016	873.005	648.822	927.972	1010.64	1462.23	868.053	989.362	4160.99	2744.38	1868.16	3352.96	6436.17	2356.16	2996.31	1713.58	1254.3	3869.34	2053.74	1474.83	1569.59	1555.62	1546.2	1574.18
668	LPE(20:4/0:0)	68.531	502.289	1010.2	1124.66	1393.06	1956.21	948.82	1956.81	727.135	2652.75	2793.59	1270.83	2045.93	1510.01	1773.5	1974.58	4094.66	2192.7	2598.4	11115.2	7388.8	5319.36	9338.61	11042.8	3947.94	5726.65	3506.63	2504.34	6694.13	3557.04	3421.87	3157.87	3209.15	3111.51	3369.41
669	TG(16:1/17:1/18:1)	741.148	860.76	2421.83	2926.5	4433.2	5885.2	4786.68	5504.77	3393.21	15175.2	16289.2	7143.77	8683.59	9081.89	7710.97	7938.14	19826.1	7395.76	8998.59	20755.3	29923.5	17507.5	24614.4	35717.7	14191.7	33698.4	20086.3	18521.1	22420.5	18990	16888.3	9333.58	14108.5	13570.4	12191.5
670	PE(O-16:2/24:0)	567.674	808.613	1377.96	1305.66	1272.47	1270.22	1356.56	1110.5	877.495	1573.22	1555.67	655.79	1125.5	627.069	842.635	963.893	1273.47	651.553	665.504	1194.88	1464.72	1018.61	1737.23	2355.12	1222.67	2217.23	1103.62	1093.46	1808.13	1232.7	1506.84	1495.76	1527.29	1351.45	1396.61
671	PE(P-16:0/20:2)	507.793	750.555	4127.24	4189.55	6128.9	14245.3	5170.5	9115.45	5848.86	14753.2	18590.3	3243.18	3899.42	3452.07	9924.25	12025.1	12932.1	3086.29	7283.53	12119.8	10383.7	13029.7	14157.4	13270.8	9585.5	23417.8	6290.89	12781.6	15232.6	5772	13600.7	18292.2	17861.3	16570.1	17448.9
672	PC(O-18:2/15:1)	360.09	728.559	9905.58	9847.87	11507.5	12885	9288.07	11221.3	6156.53	13609.5	16603.3	6498.4	8848.32	7269.19	9109.35	9125.68	11677.9	4234.2	4757.26	9767.4	8205.74	7422.03	12608.5	20970.4	8272.54	17159	7548.55	7905.84	13146.6	9503.41	12010.5	11134.6	9982.98	11674.5	9342.71
673	PC(P-22:0/22:4)	581.585	878.686	1821.49	2400.57	1715.3	1745.07	1852.89	1487.52	1015.68	1738.97	1841.8	898.71	1502	763.596	1393.25	1172.05	1830.33	774.159	860.361	1572.39	1985.23	1959.69	2277.27	3150.5	1315.64	3244.49	1473	1363.58	2328.92	1455.6	1704.4	1717.73	1904.01	1900.03	1755.89
674	PC(18:1/26:2)	552.51	896.703	11541.6	11319.9	10601.6	10470.5	9475.98	9401.27	6396.97	5459.1	6094.63	2544.13	4175.74	2639.71	4315.1	4217.67	8683.55	3338.35	4208.11	8190	8074.58	7282.84	9536.51	13135.6	5472.53	11859.8	5918.23	5525.75	6930.78	5342.84	8349.12	8597.07	8956.41	8407.9	8263.97
675	PE(O-18:2/24:4)	537.401	828.579	1470.45	1476.93	1586.74	1533.13	1465.13	1445.59	844.379	1599.37	1812.11	870.535	1262.15	848.889	1360.33	1163.65	1750.56	776.532	800.047	1650.58	1909.12	1402.85	2235.7	3591.67	1332.95	3380.68	1616.3	1403.16	2240.2	1599.6	1618.05	1603.97	1533.8	1598.73	1784.01
676	PC(P-22:0/22:2)	649.787	882.719	9093.3	7515.42	7255.79	5822.42	5707.24	4880.24	3827.61	9777.09	10234.9	5029.19	7939.76	5189.73	7940.13	8132.8	9096.84	4021.48	4705.75	7733	9923.92	7867.97	11499	19986.5	8773.07	18762.2	10220	7939.14	12593.5	9663.69	8667.28	8537.77	10408.3	9957.34	9529.37
677	PC(P-22:0/22:1)	620.595	884.735	2866.56	1985.25	1881.16	1862.39	1939.14	1230.63	1171.57	2978.01	2791.04	1312.49	2091.57	1492.08	2323.61	2398.19	1335.06	661.333	904.018	1312.17	1364.93	1518.43	2109.48	4745.85	2312.83	4993.68	2462.46	2077.59	2942.21	2346.4	2361.08	2293.42	2733.96	2291.24	2220.41
678	TG(18:0/18:0/18:1)	741.271	906.835	46974.6	40656.2	35721	33383.1	30879.3	21659.7	18579.1	128478	138309	59877.5	82872.9	58735.7	71927.7	84987.2	95373.9	45930	45588.3	92174.3	122190	90438.4	136665	134109	67775.7	185030	84106.6	62034.1	106931	88932.5	91500.9	81315.3	81860	83525.8	79308.7
679	PC(P-20:0/14:1)	513.97	744.584	12865.1	11823.4	11718.9	10901.7	10965.7	32008.8	6897.82	12427.1	43027	6117.16	8697.13	6125.41	8940.77	8893.62	11922.6	5564.94	6145.98	9928.54	13218.3	8741.2	13243.5	22235.4	9753.21	20623.9	11172.1	10224.1	15025.5	11802.7	12107.7	12818.8	12207.7	12496.1	13318.6
680	DG(16:0/20:0/0:0)	551.419	642.592	7694.75	6343.5	4725.89	4796.08	5378.9	4252.99	3189.3	9913.65	12765.6	5593.97	6539.47	4977.97	6000.84	6709.56	19732.9	9264.91	10605.8	20738	14504.6	18172.4	21813.5	27016.1	9779.22	13135.2	13001.8	8499.28	12051.5	10110.5	13293.5	10579.5	11369.8	10331.2	10198.6
681	PC(18:2/20:1)	427.156	812.602	22308.3	20885.9	22248.4	20165.8	16529.7	22021	12058.4	64597.7	69697.2	32342.1	48237.8	35081.6	46873	46135.8	87315.6	38647.9	43582.2	82768.5	101401	73488.8	115726	111326	43008.2	92622.8	46541.1	40101.7	61703.5	45499.5	47479.2	43479.6	43561.3	46480.8	45151.1
682	DG(18:1/22:2/0:0)	601.593	692.614	690.688	471.661	672.931	794.579	1043.03	1079.46	726.44	2117.89	2263.72	1404.32	2407.58	1321.31	1940.32	1931.98	4782.65	1908.3	2722.7	4770.7	4434.1	4190.42	6444.41	11598.2	4831.46	8584.94	4485.28	4795.96	6240.08	4857.76	4168.63	3745.14	3592.71	3413.86	3108.79
683	TG(12:0/12:0/22:1)	628.032	794.716	178.873	197.313	247.791	239.518	199.583	264.751	141.621	945.146	1030.89	495.075	683.907	762.473	486.921	681.277	676.383	332.659	350.306	678.364	575.061	567.522	939.744	3706.09	1578.09	5547.09	3735.13	1237.53	2481.45	2214.94	1249	1181.5	1135.11	1153.49	1111.6
684	TG(12:0/12:0/22:2)	630.517	792.699	463.802	504.631	553.055	589.817	415.784	527.466	293.037	1872.41	2061.29	838.309	1240.98	945.021	984.544	1324.92	1379.71	555.253	656.473	1176.42	1216.13	1066.87	1660.9	3680.07	1761.84	6663.98	2783.08	1486.41	2732.37	2680.01	1530.58	1541.83	1453.16	1515.09	1508.97
685	SM(d20:1/22:1)	486.735	813.677	18606.2	15847.3	16554.7	16113	18341.3	15027.8	11600.6	16952.4	20905.1	8449.36	13398.4	8724.73	10249.8	11916.3	13903.4	5951.39	6913.6	13250.5	12912.7	10898.1	16577.9	39169.9	14783.4	27700.4	15738.4	14992.4	24019.5	15744.5	18919.7	17283.8	17801.8	17421.9	17850.3
686	LacCer(d14:2/27:0)	472.099	958.712	2350.57	1518.23	2075.62	2575.07	1401.93	1257.08	817.184	2204.91	2394.37	1213.03	1852.7	1032.47	1160.26	1667.65	2689.78	875.322	1153.22	1790.33	1978.09	1788.07	3069.34	2962.96	1167.37	2561.92	1600.05	1618.41	2231.38	1563.33	1957.24	1884.42	1715.49	1977.49	1886.46
687	PC(16:0/18:0)	423.762	762.589	3.50457e+06	3.52871e+06	3.82827e+06	3.70142e+06	3.09355e+06	3.487e+06	2.14915e+06	4.94197e+06	5.49316e+06	2.60299e+06	3.68094e+06	2.69663e+06	4.08817e+06	3.52429e+06	5.64556e+06	2.45475e+06	2.75004e+06	5.30507e+06	6.05867e+06	5.02375e+06	7.45674e+06	9.49692e+06	4.32637e+06	9.35518e+06	4.61112e+06	3.91531e+06	5.99497e+06	4.26124e+06	4.31534e+06	4.56239e+06	4.46573e+06	4.43363e+06	4.50519e+06
688	SM(d20:2/22:1)	469.521	811.66	741839	599660	590638	542241	602157	462887	353675	435128	566837	208993	330621	196665	271240	291937	281932	123112	120517	232899	141330	203152	281724	537925	235289	419646	245880	231360	369420	241069	452457	449386	472062	473347	493660
689	PC(26:2/16:1)	518.109	890.654	5180.26	4432.11	4917.78	4441.65	4220.23	3998.78	2715.23	3144.99	3049.19	1212.36	2141.58	1327.86	2270.39	2053.96	3389.68	1603.47	1871.54	3006.22	2977.75	3584.29	5073.44	6187.25	2684.61	5403.9	2674.44	2452.36	3379.9	2665.74	4094.67	3578.2	3474.69	3536.53	3561.1
690	LacCer(d18:1/26:1)	526.471	1000.76	839.75	730.121	789.355	785.613	735.013	656.548	454.114	845.713	798.413	387.677	564.279	305.743	370.464	573.478	974.427	397.71	474.458	756.775	926.292	617.989	1298.71	1415.84	581.26	1183.92	589.54	336.873	908.478	637.573	824.686	712.078	834.687	682.053	623.959
691	PC(16:1/22:4)	348.293	830.552	9502.95	9235.62	8810.55	8899.62	7973.5	7951.17	5678.05	10593.2	11183	5756.16	7554.25	5940.11	8363.16	7569.92	13373.4	5219.39	6805.82	10229.4	10117.8	9507.17	14783.2	14087.9	6693.54	13816.2	7290.98	6797.44	10596.9	7367.28	10018.2	9980.13	10053.4	10909.7	11158.8
692	SM(d18:0/24:0)	522.143	817.701	14615.4	12301.6	12711.6	11853.8	14931.8	13202.9	9253.05	12567	13264.8	5588.16	9312.38	6690.89	7507.71	9037.52	10661.7	4282.7	5312.76	9957.13	8861.02	8306.86	12344.7	27810.5	11939.4	22819.5	11972.7	11855.4	16934.3	11995.1	14760.9	13415.4	13766.5	14368.2	13498.7
693	SM(d22:1/12:0)	413.68	703.567	8717.39	9583.32	8123.52	5236.73	7273.73	5844.17	3964.12	8050.38	8608.76	4134.6	6359.36	4437.94	4962.95	5864.64	5059.5	2541.41	2269.81	4252.59	5081.55	4186.96	4987.48	11112.4	4940.68	9401.15	4663.45	4006.14	8519.42	5052.63	7056.19	6300.71	6462.03	7304.28	8037.59
694	PE(O-16:2/20:5)	294.226	720.511	611.613	553.485	686.843	576.683	509.965	572.559	344.675	628.982	669.858	311.822	459.126	372.288	520.99	486.373	638.653	275.349	288.51	552.678	609.69	498.511	823.707	3079.92	1012.21	2711.67	1474.76	1006.44	1749.81	1194.19	865.96	887.175	1089.53	908.534	946.45
695	PC(11:0/17:1)	276.077	676.486	992.695	839.732	932.06	933.4	877.956	1054.69	781.948	925.046	999.76	423.999	639.014	623.681	684.183	723.723	577.37	267.278	380.254	590.977	656.013	526.722	847.522	2568.55	709.212	3318.52	1526.1	650.401	1061.4	1018.02	1049.39	1024.49	1140.28	1063.46	1013.34
696	PC(O-16:2/14:1)	300.504	686.506	378.924	318.207	360.279	381.435	313.109	339.359	202.85	388.565	479.644	205.012	292.425	213.311	334.511	260.646	380.549	151.859	191.402	387.287	412.789	300.565	542.697	8440.06	1961.61	4446.29	2262	2126.12	3069.41	1960.23	2733.07	1088.96	1718.64	1012.48	1055.61
697	LPC(O-16:1/0:0)	92.814	480.34	1802.62	1753.02	1736.72	2005.85	1991.79	1210.23	908.966	6002.12	9614.61	3029.67	4787.38	2727.01	4464.77	4561.22	6074.03	2269.49	3067.43	5948.13	4806.49	4579.88	6375.93	9709.65	2506.06	5514.95	2810.67	2696.2	4075.96	2635.48	3920.1	3990.69	3811.39	3793.42	4049.62
698	PC(18:0/24:4)	514.895	866.648	4558.02	3175.92	3343.85	3383.81	3852.69	2767.93	2027.81	3152.05	3445.62	1457.41	2390.15	1550.32	2668.05	2227.27	4390.83	1818.68	1892.46	4121.03	3969.91	3258.76	4006.53	6495.44	2464.93	5606.11	2908.69	2550.51	4007.13	3237.12	3382	2991.25	3317.76	3094.19	3179.66
699	TG(18:1/22:5/20:1)	749.555	978.848	1461.71	1847.61	2216.74	2441.03	2255.1	2436.89	1226.89	3155.55	3331.14	1399.52	1988.14	1777.27	2254.59	2167.92	3622.64	1657.36	1642.18	6382.48	4340.46	3115.39	4947.18	5288.46	2425.46	6385.64	3948.9	2213.5	3435.25	2959.6	2719.38	2671.42	2752.7	1988.56	2518.21
700	TG(17:1/18:1/20:1)	729.727	916.825	11375.4	10731.1	9444.38	9277.78	7324.6	6240.64	4251.23	14303	14133.1	7174.53	10224.6	6613.98	8122.28	8742.54	7573.38	4031.9	4168.98	8015.29	7664.55	7284.4	12262.7	10185.1	4548.67	14743.7	6545.54	4430.45	8969.77	7271.54	11055.9	9985.27	9118.88	9824.39	9532.04
701	SM(d17:0/17:0)	333.615	705.575	4141.67	3220.22	3960.54	3482.47	3841.75	3688.23	2292.2	3716.86	9895.8	3919.47	5723.88	4208.56	3226.55	5694.23	6172.84	1811.96	3119.56	6631.58	3246.47	3498.54	5196.48	19196.9	8674.38	13756.9	10214.3	10368.7	13848	7634.71	8949.44	9414.26	8728.98	8567.92	7917.54
702	PG(2:0/28:0)	298.274	717.463	699.051	657.796	704.15	708.565	668.717	644.911	1014.88	610.709	738.985	349.065	442.848	1080.39	486.876	467.657	610.789	298.829	291.226	646.933	719.035	558.771	999.444	1356.35	554.542	1233.44	588.998	489.922	864.26	583.481	712.016	641.467	683.101	622.531	654.284
703	PI(18:4/22:2)	303.348	928.584	2414.08	2241.22	2038.66	2166.59	2329.34	1638.81	1429.12	1747.21	1657.73	767.187	1699.7	774.17	1381.13	1335.17	1439.06	563.985	771.526	1395.66	1104.18	1118.49	1712.84	2829.39	1258.65	2624.7	1445.22	1927.2	1552.32	1166.55	1755.45	2014.57	1881.64	1845.69	1781.63
704	TG(17:1/16:0/22:2)	803.682	916.822	151.353	190.764	211.215	304.478	175.869	182.596	167.166	630.036	453.61	240.3	311.471	286.788	337.299	400.102	634.19	283.296	358.256	745.787	532.271	607.306	812.117	1215.89	517.076	1351.52	863.81	691.562	1021.8	902.758	617.124	584.518	576.069	534.238	656.04
705	PC(14:0/16:0)	320.231	706.524	60543.2	44998.7	39250.1	41040	42306.1	39191.8	28378.4	32782.4	37070.2	19214.9	24496.4	15073.4	21046.5	22457.7	22139.3	8704.73	11685.7	20789.6	29679	17307.4	25054.9	83107.8	33539	77850	40333.6	32722.2	49426	33982.4	36767.7	36797.9	36383.2	36703.3	36229.5
706	TG(14:0/14:0/20:4)	703.612	816.709	6660.83	6341	6538.9	9051.06	8222.39	7514.61	5565.01	29230.4	29959.7	14339.1	20421.2	13101	19354.5	22531.5	37804.3	14057.4	20503.4	35922.6	29332.7	33863.7	44551.3	67892.6	26823.2	59064.6	40470.1	38745.2	48161.2	36136.9	32570.3	28982.2	27734.9	27078.6	27918.1
707	PC(17:1/22:1)	459.272	828.634	8468.25	6253	4702.65	6458.17	9049.47	4894.19	2430.22	13809.6	11943.3	7111.15	1678.26	7184.79	4835.22	2278.11	18134.8	6787.86	8508.66	16234.5	17180.2	14160.3	24953.9	25696.3	11454.8	25700.5	13009.2	11089.5	16751.9	12155.3	15089.6	11858	4185.56	10327.4	10165.5
708	Cer(d18:2/20:0)	497.916	592.552	926.618	766.985	782.332	943.098	1131.07	696.761	774.55	14388.8	17308.8	9158.53	12156.6	8305.29	11709.4	12824	17507.2	7845.15	10573.4	15141.1	20161.1	15035.6	22202.1	51120	20976.3	41730.2	25271.1	23538.9	33048.6	24402.2	16799	16374.9	16853.4	17579.7	16637.7
709	PE(O-18:2/12:0)	358.973	646.475	2753.17	2439.45	2650.44	2786.56	2024.77	2452.69	1810.7	3097.23	3397.89	1561.53	2264.53	1500.6	2071.54	1972.31	1778.55	868.984	1026.96	1996.26	1819.49	1741.88	2592.17	7021.07	2957.7	6696.29	3301.11	2990.26	3990.07	3467.78	3177.49	2918.92	3114.98	3449.97	2497.46
710	PI(18:2/18:3)	258.791	874.537	320.702	428.122	507.217	323.204	240.316	298.308	380.902	1503.2	1470.21	791.741	1157.73	758.952	1236.92	1156.37	957.226	313.412	446.592	871.517	658.871	690.911	910.569	2388.64	1137.12	1768.13	991.011	883.818	1300	968.359	884.71	852.195	963.099	851.492	885.318
711	TG(16:1/22:6/16:1)	642.575	892.732	589.504	488.955	618.17	610.32	458.211	571.268	319.014	2574.98	2451.54	1251.5	2041.58	1216.59	1306.45	1768.89	1507.49	745.025	816.75	1715.88	1705.16	1589.64	2503.23	2154.02	812.524	2647.95	1117.82	1034.08	1696.85	1449.9	1295.75	1273.98	1294.68	1317.58	1356.99
712	LPS(18:0/0:0)	81.772	526.309	449.564	418.055	421.644	512.331	505.462	501.569	385.486	1209.7	1514.11	570.952	961.98	652.217	954.168	1116.15	1678.96	566.25	851.362	2082.75	934.562	1151.93	1610.7	4278.52	1597.42	2191.23	1589.19	1437.56	3027.38	1503.6	1506.49	1375.99	1344.81	1245	1311.57
713	SM(d21:2/22:1)	491.562	825.675	9278.45	11234.1	8264.66	7643.19	8133.47	5582.67	4853.29	5118.33	7237.25	2824.83	3573.15	2933.06	2993.7	3948.72	4108.94	1340.75	612.403	1761.9	1917.66	2906.77	2633.6	6075.64	2860.23	3415.67	2199.04	2206.81	6387.41	2608.63	6665.07	8076.34	6700.25	6787.11	9417.13
714	LacCer(d18:1/23:0)	510.711	960.727	1516.65	1011.01	1288.68	1117.78	940.091	1029.35	619.016	941.711	1397.27	497.212	909.31	694.89	595.689	945.224	1507.42	423.434	848.101	1293.31	1421.44	1280.42	1300.29	1959.29	715.309	2086.95	1308.7	1012.61	1636.93	954.216	1234.87	1209.84	1281.29	1512.13	1303.59
715	PE(22:5/20:4)	333.293	814.536	3133.55	2354.01	2470.72	2319.63	2570.53	1986.07	1507.91	6775.3	8296.63	3661.27	5177.32	3707.5	5548.09	4972.74	7819.16	3029.7	4442.33	7793.65	6463.79	6556.3	8878.92	33178	5678.03	13155.8	13951	7672.34	10227.3	6302.75	7664.75	7212.73	7185.59	6069.74	6339.88
716	PC(16:0/24:1)	514.418	844.663	14195.7	12783.1	11964.1	11357.4	10741.1	9609.03	7929.65	15812.6	15094.4	6455.56	10588.9	6445.57	11464.4	11806.4	20616.2	8613.57	8770.3	20569.9	16875.8	14545.9	20421.5	29395.8	13738.5	26555	14452.7	14031.3	18272.5	13703.3	15808.1	15647.1	16885.7	16026.6	18707.4
717	PE(P-22:0/20:4)	536.384	808.612	1448.35	1301.23	1391.77	1299.36	1214.12	1284.4	774.894	1977.34	2075.91	1017.62	1395.42	877.006	1302.18	1369.86	2403.78	1026.63	1083.76	2006.69	2268.8	1725.86	2613.54	2563.53	1195.82	2542.12	1112.69	1235.47	1567.25	1228.99	1758.43	1696.32	1598.33	1647.05	1656.72
718	TG(16:1/16:1/20:3)	727.031	870.756	21163	18300.6	21121.1	19293.3	18862.2	16526.3	10467.6	56855.2	59063.6	29708.7	38486.9	30848.3	37085	40568.2	60717.8	25276.3	28269.3	52337	55295.5	50855.2	85312.2	112761	49323.2	129032	60695.5	47923.8	80130.7	61499.2	53503.5	48034.9	48423.6	48395.2	47395.9
719	TG(18:0/18:0/22:0)	841.258	964.911	922.233	750.149	972.833	1105.82	826.168	736.772	636.878	1383.86	1529.45	829.463	1031.07	703.796	1026.71	1227.1	2303.07	1058.2	1293.62	2232.47	2203.73	1969.11	2885.5	4478.66	2001.64	5657.35	2969.98	2251.27	3186.15	3052.76	2321.12	2067.64	2004.38	1969.81	2062.28
720	TG(18:0/18:0/22:1)	802.058	962.896	2437.96	2231.5	2324.48	2187.15	1652.24	1472.22	1289.9	3202.77	3338.73	1628.4	2202.68	1600.29	1973.87	2165.07	3520.15	1644.41	1766.55	3457.46	3510.62	3141.87	6253.55	6878.57	3175.95	9057.57	4459.9	2850.1	5279.8	4694.06	3780.91	3445.15	3290.02	3115.56	3134.45
721	Cer(d18:2/14:0)	337.731	508.469	803.381	665.595	993.005	1320.55	482.248	319.796	304.896	1908.56	2183.58	854.767	1671.98	926.26	1328.73	1286.34	1703.91	704.371	964.921	1723.15	1805.09	1360.72	2046.74	3414.4	1654.39	1808.2	1358.76	1067.27	1602.18	1565.88	1431.89	1419.35	1662.95	1472.37	1409.34
722	PC(18:0/19:0)	458.05	804.654	9087.44	10701	12544.3	13969.7	10761.8	11145.5	6499.3	11933.8	14651.4	7445.09	8338.3	7054.52	9638.09	7942.61	14937.5	7101.67	6306.03	12928.7	15917.9	12569.8	20718.5	24255.7	9262.02	21973.8	11676.7	10277.2	13904.2	9789.31	12207.6	11412.9	9419.58	10239.3	11665.8
723	PE(22:5/18:3)	311.881	788.526	2911.7	2362.01	2143.93	2429.75	2211.46	1651.08	1651.52	2023.11	3247.42	1247.33	1906.86	1346.31	1912.42	2092.07	2276.71	854.397	1145.36	2157.71	2259.63	1701.51	2705.47	4682.44	3005.48	6680.96	2259.19	1750.83	2831.72	2942.44	2877.61	2700.86	2748.02	2657.2	2628.19
724	TG(18:1/18:1/21:0)	785.341	946.872	1871.89	1690.73	1685.11	1562.51	1298.17	1198.77	1099.78	2069.03	2082.53	991.203	1280.61	939.818	1205.04	1291.75	1917.99	759.209	928.926	1792.07	2273.54	1773.59	2615.99	3713.35	1546.39	4900.55	2075.52	1648.86	2470.51	2439.74	2317.54	1843.76	1735.9	1799.6	1763.82
725	TG(14:0/14:0/22:5)	704.852	842.726	22339.2	19160.8	20430.5	19278.8	18149.2	13416.6	10418.2	102106	106234	52358.7	69621.5	48722.3	60534	66570.9	84729.6	39372.2	42368.7	73987.6	82994.8	77493.4	112215	180988	77692.2	186644	90688.6	77945.9	119303	98870.4	76392.9	79410.4	77494.4	77751.8	78871.9
726	PC(P-16:0/20:5)	470.418	764.574	114317	186882	155342	233536	176588	206439	121211	160244	431869	117315	291593	196897	134929	92346.1	185202	226435	263570	547527	608331	493880	366162	857280	149950	775732	105610	380385	530270	387751	171798	140499	387072	377775	361945
727	PC(O-22:2/15:1)	456.007	784.614	31311.2	41413.9	14405.5	49366.5	13644.1	55317.8	29328.8	14128.8	39760.6	4520.34	9471.83	22152.1	4361.81	9498.68	63132.6	22894.3	5325.87	59091.3	57414.4	2667.86	85673.3	14484.6	33039.3	79119.2	6984.62	6922.44	35113.4	3220.17	42725.1	10989.7	7753.57	32832.5	34221.5
728	LPC(O-18:0/0:0)	133.614	510.387	1292.49	1269.37	1229.22	1181.8	1053.81	966.57	871.981	3168.56	3594.39	1463.31	2442.11	1418.47	2033.44	2162.97	2117.48	911.8	1080.72	2697.4	1878.68	1820.82	2532.97	7900.3	2882.33	5750.99	2822.15	2631.66	4354.27	2661.55	2569.74	2604.35	2440.8	2486.26	2559.8
729	TG(16:0/13:0/16:1)	628.123	780.689	180.077	213.508	224.953	267.534	198.545	266.706	154.917	2095	2147.19	1128.44	1547.99	1177.82	1138.93	1538.43	1309.84	542.857	637.212	1101.39	1161.13	1022.45	1569.36	7585.95	3136.14	12069.2	4804.36	2276.58	5154.81	4415.7	2444.97	2586.5	2242.56	2414.98	2567.99
730	PC(15:0/17:0)	374.706	734.555	1.85609e+06	1.80601e+06	1.81117e+06	2.00061e+06	1.68939e+06	1.77288e+06	1.20023e+06	3.64856e+06	4.24871e+06	1.92142e+06	2.7604e+06	1.94557e+06	2.89148e+06	2.661e+06	3.73483e+06	1.6473e+06	1.82337e+06	3.47163e+06	3.90294e+06	3.14223e+06	4.48297e+06	6.7277e+06	2.86048e+06	6.4957e+06	3.302e+06	2.86989e+06	4.27372e+06	2.95223e+06	3.0671e+06	2.95202e+06	3.02265e+06	2.94312e+06	3.01e+06
731	PC(22:5/14:0)	418.569	802.537	2597.99	2108.31	2211.68	2423.35	1870.06	2847.53	1579.01	4814.06	4250.7	2762.89	2921.46	3151.64	3395.27	2784.95	4771.44	1953.56	2513.15	6781.18	6058.5	6686.69	10417.8	10848	5517.58	9599.12	4122.34	4611.42	7648.97	4722.94	4249.68	3547.56	4855.84	3799.82	5059.95
732	PC(16:0/16:0)	374.707	756.537	67280	77067.8	88849.7	98155.8	68603.1	94825.7	54397.6	103174	107311	63925.4	72314.9	60541.9	76176.1	67591.4	146876	56537.7	58050.9	131063	159692	127212	207995	240605	106420	239606	105835	97861.8	150384	114270	96387.9	88418.6	84962.2	83955.6	83393
733	TG(17:1/16:1/22:2)	769.942	914.808	1630.7	1344.77	643.28	1113.14	977.417	852.31	685.347	2753.95	3519.38	1725.78	2135.75	1520.61	2583.11	2459.51	3974.97	1506.4	1925.87	3693.67	3803.41	3458.03	5367.27	7292.78	2663.04	8706.57	4669.4	3224.35	5334.17	3633.08	3087.33	2836.64	3336.7	2879.05	3136.66
734	PC(22:5/22:6)	470.507	880.585	6053.32	4643.19	4898.46	4988.69	3418.54	6363.67	2349.81	6884.97	6338.79	3697.88	4511.57	5474.26	5776.43	5330.26	8840.87	3857.78	5013.97	9626.47	9401.19	7936.23	11992.8	19439.6	7483.75	13775.8	6481	5507.73	9511.42	6666.56	6085.55	5613.61	5794.05	7498.56	8070.42
735	SM(d19:0/22:1)	485.243	801.67	14530.9	12314.3	11421	11330.7	11792.9	9491.52	7337.83	13825.7	16154.7	6326.84	10313.8	7009.89	7829.8	9088.19	9697.01	3869.1	4039.74	8715.19	7866.16	7067.51	10949.3	22944.1	8136.88	14596.7	7819.56	7859.44	13049.3	8683.89	12120.8	11697.7	11944.7	11829.5	11820.5
736	TG(18:0/18:0/20:0)	843.433	936.889	1078.15	929.592	1089.23	1583.06	1203.53	1226.89	1004.01	3038.73	3068.09	1732.3	2194.86	1483.78	2062.72	3012.8	4866.49	1929.15	2995.38	5149.14	3376.53	4177.44	5794.53	12995.5	4927.77	14918.2	9229.09	6797.08	8789.02	8702.47	6224.55	6316.04	4730.75	4766.57	5347.1
737	PE(O-16:2/16:1)	366.657	672.49	2823.26	2419.65	3578.14	2552.95	3580.4	4055.72	2770	4243.44	6332.77	3080.26	2763.38	2832.21	3972.29	4049.92	3720.31	2113.31	883.893	3106.56	5924.17	2925.45	7190.28	10061	3963.93	10264.7	5449.51	4171.62	6460.5	4334.74	1725.84	4619.34	3567.53	4301.79	3154.24
738	TG(20:1/20:1/22:1)	803.987	1014.93	703.002	623.751	632.237	685.728	804.877	526.547	296.045	427.329	444.872	204.885	254.383	235.007	297.546	304.267	466.269	219.796	251.891	413.242	598.335	385.949	696.978	821.805	311.714	944.207	419.669	288.913	547.502	448.131	504.245	419.386	447.199	453.512	487.643
739	PG(14:1/18:0)	273.11	743.477	375.222	520.309	345.478	324.365	297.055	317.548	194.623	791.481	958.604	335.598	660.446	417.087	774.45	582.235	646.333	301.289	340.055	1136.97	645.915	604.935	912.044	899.813	364.3	878.297	453.982	317.506	581.119	379.028	556.209	517.398	554.264	521.763	477.016
740	TG(20:1/20:1/22:2)	804.514	1012.92	1384.88	1339.76	1466.68	1216.9	1002.18	940.913	667.03	682.967	774.236	311.697	468.537	410.565	709.832	514.503	856.795	356.259	405.514	762.478	1094.85	725.571	1376.45	1337.33	645.92	1912.1	718.335	696.923	937.458	897.184	997.371	811.371	930.833	930.37	815.443
741	LPE(P-18:0/0:0)	132.551	466.325	2310.25	2191.74	2353.93	2010.46	1934.52	1879.92	1537.68	4391.63	4949.57	2042.18	3733.71	2278.19	3080.47	3393.92	3602.34	1522.48	1605.94	3328.23	3331.83	2834.34	4710.09	13450.3	5783.23	12831.2	6129.17	5381.77	7992.49	5340.05	4651.38	4793.57	4369.85	4834.74	4848.88
742	TG(14:0/14:0/15:0)	626.835	754.675	315.597	254.71	341.88	360.885	287.142	332.55	217.431	2137.79	1216.12	676.979	1440.53	761.438	741.894	891.168	1016.55	569.155	551.218	674.148	843.936	715.851	706.418	8210.5	4012.72	10142.4	4948.8	3191.66	4883.77	4778.09	2812.3	3857.74	2498.44	2845.67	2823.03
743	TG(17:0/18:2/20:2)	693.688	914.8	1106.1	994.202	1176.39	1168.62	981.033	820.381	587.208	3313.26	3742.91	2243.27	2832.67	1827.13	2272.09	2695.33	3305.59	1664.94	1736.44	3048.48	3580.43	2752.92	4059.14	4825.06	2049.22	5080.8	2224.43	1988.72	3760.93	3960.97	2828.72	2935.38	2589.54	2309.24	2721.76
744	PE(31:0/2:0)	514.001	706.533	1627.02	1407.01	1577.46	1495.09	1354.32	1316.45	767.004	2093.05	2026.48	918.43	1276.76	798.949	1233.33	1171.65	2924.17	792.75	1151.12	2206.97	2481.59	2364.64	1263.46	4332.57	1550.51	3629.61	1581.91	1805.25	2602.85	1932.41	2173.97	2743.91	2297.42	2072.16	2058.03
745	TG(22:4/15:1/22:6)	665.134	956.759	2001.08	2311.53	2845.91	2894.83	2072.72	2685.95	1492.62	2742.85	3022.06	1609.46	1926.98	1544.47	2407.26	1773.04	3878.97	1687.88	1756.04	3931.3	4729.17	3372.66	6173.72	5598.24	4364.31	6232.51	2648.86	2620.26	3781.75	2883.16	2640.9	2405.64	2505.71	2502.22	2384.33
746	TG(14:0/14:0/18:3)	636.678	790.686	1646.98	1061.28	1108.37	1150.79	1010.04	1209.27	688.418	4428.74	5849.87	2372.54	3319.4	2323.51	3220.7	3342.7	2683.31	1760.5	1423.49	3692.98	3292.86	2363.38	4093.35	6459.55	3011.8	10829.5	3978.8	2904.79	6710.22	6103.48	3546.4	4041.94	3165.03	3221.68	3973.86
747	Cer(d17:1/22:0)	541.606	608.593	538.035	569.07	470.183	584.693	461.723	461.038	309.883	2099.68	2040.82	953.154	1360.81	829.059	1221.45	1389.42	1949.2	862.795	996.971	1738.5	2392.81	1794.02	2973.56	3813.82	1725.02	2932.36	1486.66	1416.75	2400.17	1630.81	1577.9	1536.39	2303.16	1672.62	1399.27
748	Cer(d18:1/25:0)	604.278	664.655	1309.51	963.938	1991.83	1047.56	1824.01	844.816	617.041	1999.08	2193.92	885.277	1550.16	990.799	1284.52	1586.1	2535.96	1022.5	1204.19	2423.35	2629.15	2089.1	3216.92	3844.05	1598.62	3391.13	1941.19	1708.4	2376.29	1791.74	2045.42	1911.04	1946.57	2129.88	1885.41
749	TG(18:1/18:2/18:2)	666.722	898.775	1953.74	1878.03	2081.99	2068.72	1818.58	1699.82	1027.52	12950.6	12230.1	6518.86	9468.3	19522.1	6875.71	9536.84	9179.29	3799.46	4233.86	8285.97	8769.15	6919.07	11904	31621.5	17917.6	33614.4	16943	16494.7	25846.9	23680.4	11847.1	10987.4	11252.3	11839.1	28790
750	TG(20:0/20:1/20:1)	840.254	988.919	4677.08	3600.52	4180.36	3809.59	3222.25	2431.22	2111.41	2722.95	3135.98	1842.82	2126.8	1494.49	2053.03	2597.96	4590.79	1922.24	2419.16	4372.43	5082.46	3717.05	5184.82	10292.6	3618.07	10717.4	4635.71	3518.8	5662.76	5669.71	4875.75	4158.59	3904.53	4560.04	4046.56
751	TG(20:1/20:1/20:2)	772.244	984.888	2950.09	2682.73	2762.62	2737.69	2184.17	1864.71	1196.97	2236.84	2397.3	1081.31	1569.09	1098.14	1469.97	1515.58	2225	960.436	1151.29	2191.07	2541.07	2054.31	3397.62	3592.36	1360.9	4479.41	1822.28	1269.31	2543.92	1938.9	2432.73	2215.47	3437.77	2077.33	2039.83
752	GlcCer(d18:1/18:0)	431.176	728.597	1869.4	3686.75	6655.44	3875.22	1457.24	5573.4	4236.57	30271.7	40994	18684.4	24977.9	16223.9	20963.8	24741.7	18455	9534.72	10498.5	17768.7	28082.9	18225.1	27262.1	17331.2	7181.22	14380.3	8431.48	7687.74	11058.5	7973.5	15376.5	15448.4	15069.9	15144.8	15078.8
753	PC(15:0/16:0)	339.485	720.566	10820.9	8265.12	7370.85	6972.16	7838.12	5138.3	3806.04	7994.82	11715.6	3052.76	2895.89	3206.8	3193.73	6411.48	4009.3	1411.4	2354.86	2676.42	3188.48	3134.82	3337.43	10743.4	5465.61	5952.71	5970	4556.79	7278.35	3131.55	7405.48	9739.96	8905.05	8009.57	8171.3
754	PE(2:0/30:0)	482.763	692.525	3347.81	3734.61	2962	3144.98	3225.36	2960.95	2217.41	3392.74	3669.26	1581.38	2492.23	1446.92	2039.22	1846.5	5843.84	2821.93	2692.11	4566.13	4969.38	4546.48	7164.17	8697.29	4114.42	7390.08	4890.37	3563.16	5706.26	4202.79	3401.28	4193.02	3695.59	3948.37	3594.74
755	TG(19:0/16:0/20:4)	715.326	914.809	11419.7	1205.1	1576.41	1381.41	957.526	8522.92	769.968	8367.3	8843.45	5514.53	6903.51	4786.57	5607.1	6519.47	7489.67	2338.12	3446.24	6092.24	18705.5	12188.7	8785.19	9949.8	4710.7	10528.2	4601.7	4469.46	8101.22	5790.61	7065.49	5300.52	4665.64	5511.54	5758
756	Cer(t18:0/16:0)	332.365	556.52	233.8	223.928	202.457	218.692	191.001	182.161	174.031	758.393	830.618	310.307	639.842	306.619	496.743	581.269	702.138	211.82	410.772	840.151	518.565	672.176	458.711	1604.08	676.585	982.514	680.141	381.85	1260.07	573.003	849.463	897.657	672.864	603.211	685.161
757	TG(17:0/18:0/18:0)	826.04	894.871	690.734	631.502	689.412	583.708	524.911	544.642	338.883	1759.69	1985.64	869.654	1319.59	899.894	1271.45	1477.48	1379.54	631.737	853.753	1396.14	1516.02	1323.44	2107.59	2116.45	971.643	2416.15	1223.88	1048.21	1923.2	1200.17	1499.36	1290.44	1120.18	1194.92	1263.33
758	TG(15:1/16:1/16:1)	653.403	804.702	1619.14	1982.01	1890.63	1737.16	1586.44	1764.55	825.935	3228.72	3980.83	1673.75	2504.88	1524.01	2268.65	2352.32	3114.63	1434.38	1477.51	2678.25	4058.37	2367.83	3947.34	11394.6	2364.43	5981.21	2485.89	2317.43	3689.13	3491.99	2695.93	2642.65	2428.83	2406.25	2295.52
759	CE(22:1)	786.984	724.691	441.743	431.279	466.246	443.826	359.324	397.547	230.847	509.119	780.806	325.102	396.506	240.017	366.813	379.092	522.662	187.497	293.936	490.24	645.103	453.815	768.228	771.03	354.023	897.429	379.643	321.762	512.058	381.725	493.121	424.122	405.77	423.657	410.633
760	PC(O-16:2/26:2)	544.821	852.677	4547.24	4682.62	4351.95	5569.39	6172.53	5242.88	1925.69	6509.38	6427.97	3045.87	4719.36	2917.15	4641.72	4143.47	8686.35	2030.87	2700.83	5287.89	4914.31	4160.63	5566.27	7186.68	2065.92	8105.04	3372.63	3306.66	4479.47	3814	4814.44	4344.92	4688.7	4828.35	5823.04
761	TG(18:1/17:0/20:0)	826.102	920.887	754.548	747.112	746.795	778.717	547.25	593.653	364.064	1187.4	1423.34	593.817	828.764	624.403	912.64	873.573	1232.03	577.978	598.544	1258.41	1554.58	994.053	1840.27	1778.44	888.509	1846.43	823.828	807.248	1434.04	924.561	1090.84	853.663	1044.95	973.418	889.283
762	TG(18:1/18:0/22:4)	712.686	954.833	5567.09	5907.94	7356.2	8312.41	5203.15	8324.36	4085.9	8129.99	5837.76	2983.14	5700.48	4231.73	5989.71	5680.67	5165.67	4658.46	4552.19	5776.19	6530.39	8633.79	16504.3	16893.8	7243.81	8744.26	3929.65	2844.13	11121.8	7319.83	4451.92	3882.51	6638.26	4368.32	6855.3
763	PI(16:0/17:1)	274.439	840.56	1417.1	1550.29	1568.18	1676.65	1264.52	1278.36	834.885	1181.91	1443.28	625.991	926.135	651.731	956.167	2226.1	1589.83	626.192	724.256	1492.47	1659.53	1359.72	2003.44	1785.33	713.006	1413.61	825.676	765.278	1193.27	811.707	1220.08	1353.89	1184.31	1216.76	1207.98
764	PG(15:0/17:0)	297.118	745.512	430.221	313.86	347.595	296.802	320.686	308.211	230.646	592.615	686.398	260.243	450.42	295.366	521.736	547.178	506.128	184.71	245.406	579.175	431.716	398.657	478.162	2607.34	1245.7	1887.09	1164.87	1109.65	1937.62	1019.17	895.817	824.624	1028.34	804.354	1133.98
765	TG(17:0/15:0/17:1)	724.105	836.765	1085.67	1129.25	1095.12	1342.18	865.747	986.962	713.511	5228.39	5202.97	2566.11	3379.76	2241.41	2941.98	4130.13	4501.19	1468.66	2177.76	4593.57	5091.55	3549.49	5606.08	8332.3	3229.76	8586.85	4686.87	4354.86	4756.03	4531.01	3460	4119.43	3652.42	4044.27	3726.76
766	PC(O-18:2/22:5)	436.596	818.599	54871.3	51992.2	54907.5	49162	41093.8	39895.5	29998.8	50680.8	56139.6	27986.7	38260.9	25394.7	37815.4	36819	43549.2	16980.6	19671.6	33155.4	41345.2	31067.6	49357.1	69252.4	29510.5	59808.6	33443.5	28724.9	44700.8	33714.3	45839.9	42542.2	44808.3	48015.8	45042.4
767	TG(18:1/18:1/20:3)	691.361	926.804	4054.76	3445.5	3916.89	3563.36	2911.5	2414.33	1694.95	20306.2	20931.8	11217.6	15109.4	10493.2	12953.4	15167.9	18261	7462.26	8119.22	15834.2	16336.6	14569.9	22488.9	24123	11813.9	33332.1	15959.7	12130.7	22848.7	17530.5	13626.4	13376.4	12931.6	13325.5	13609.4
768	TG(12:0/16:1/16:1)	629.783	764.671	1562.77	1716.89	1787.68	1518.9	1159.34	1901.66	1020.36	22557	25249.1	10015.8	16214.1	12267.4	9704.7	16202.6	10163.4	4737.48	5874.08	10418.7	9270.56	8358.77	13231.9	50739.1	23522	128525	47463.6	19284	42379.1	44389.4	19709.8	19186.5	20189.8	19423.8	19199.8
769	PC(14:1/16:1)	272.576	702.501	1474.2	1408.07	1435.71	1351.35	1368.52	1633.67	988.766	1197.4	1405.59	468.883	795.723	596.437	728.126	740.505	668.139	477.507	442.803	833.705	956.552	781.921	1601.31	4765.16	714.723	4856.74	1108.45	814.291	1375.8	1267.68	1776.17	1386.73	1288.91	1201.91	1151.48
770	SM(d18:0/24:4)	436.377	831.642	8249.67	8256.63	9268.62	9244.84	8015.01	8446.87	5252.65	8851.01	9137.68	4579.52	6170.75	4718.45	5615.06	6379.93	9067.57	3344.14	4039.77	7810.2	7946.98	5830.74	11064.4	16231.4	8310.87	14109.5	6572.11	5981.21	9778.23	11790.3	7531.68	6927.41	7732.08	8650.48	6635.34
771	PE(20:1/16:1)	400.058	744.539	31044.8	28645.1	31974.9	29746.3	28010.8	45513.8	19678	31815.2	44434.5	25128.2	28303.3	20502.8	26022.8	26634.4	48706.3	20394.8	23825.6	44844.9	49097.5	39568	60968.7	87785	35847.1	75750.3	41993.7	37169.4	50814.5	37102.7	38988.1	37680.4	40066.9	41428.7	38310.4
772	PC(18:3/22:4)	345.821	832.579	22660.5	21248.7	18967.6	19838.3	18437.2	16287	12944.6	16421	16590	14514.3	13126.3	7388.81	24522.1	13207.2	42295	14398.7	19393.3	34538	31099.5	28638.8	41126.1	28884.6	12336.3	42749.7	13526.7	12679.6	17915.1	11910.3	31568.7	17041.1	29965.4	30344.5	30497
773	PS(26:1/18:2)	548.872	898.636	1342.02	1215.25	1347.13	1277.91	1277.04	1163.07	817.615	1590.74	1041.9	1209.48	972.696	699.611	696.672	994.143	1001.14	494.997	461.833	1433.38	1218.54	641.22	1123.5	2257.55	851.262	4307.17	964.7	1075.28	1722.72	941.951	1412.67	1452.51	970.589	1341.29	1315.89
774	PC(16:1/22:1)	438.502	814.617	52721.5	52857.3	51996.7	66686.5	44889	42635.1	29742.2	64470.1	74473.1	13019	54082.1	13823.2	53232.3	51618	72810.3	30608.7	37466.1	63138.5	71789	57821.8	90006.4	45102.6	44354	39652.5	54328.7	48485.4	70902.7	52025.3	34656.4	35991.5	35512.1	39366.2	37955.2
775	DG(20:4/20:2/0:0)	505.815	686.567	3657.42	3088.76	3345.26	2690.59	2567.31	2017.67	1588.62	3944.48	4075.75	1731.01	2382.56	1682.87	2805.38	2046.76	5154.55	2291.12	2457.59	3845.68	4952.21	4287.98	6882.6	9545.32	6014.88	7454.38	5791.13	3387.06	8776.94	3656.49	4170	3481.96	3859.45	3772.66	5425.99
776	TG(14:0/22:5/14:0)	632.096	842.743	439.54	383.357	522.839	272.51	407.892	484.084	281.304	621.516	800.414	251.873	525.048	383.454	478.533	662.586	1115.39	423.305	590.522	996.628	1298.23	718.098	1350.67	2246.29	817.186	2233.71	931.715	758.659	1311.43	1656.83	745.302	709.752	325.918	663.71	675.221
777	Cer(d18:1/19:0)	503.274	580.562	165.978	238.34	310.935	334.251	190.676	336.627	186.316	1590.78	1690.88	698.118	1026.56	660.226	933.43	1226.15	1422.68	634.06	662.864	1267.66	1588.48	1538.25	1763.96	2583.34	1026.23	1490.03	816.316	903.685	1277.17	756.077	1208.98	971.388	962.021	1379.27	1178.01
778	DG(18:1/20:3/0:0)	479.012	662.559	2155.57	2160.1	1596.25	1763.85	1950.67	1592.39	1359.24	3108.5	3271.13	1327.44	2117.25	1382.7	2042.7	2034.48	4746.5	2068.58	2204.89	3750.2	4076.68	3608.96	5361.95	8008.91	3401.75	3770.78	2523	2335.57	5403.09	1894.56	3256.36	3085.37	3008.19	3105.85	3275.54
779	TG(16:1/17:1/22:6)	700.351	906.755	34085.1	33012.4	27196.2	29958.3	24434.5	23404.8	14496.1	66913.3	78803.2	30159.1	54706.5	32965.9	51323.1	56197.6	54416.8	22432.8	24150.2	52185.4	52123	44192.5	76488	66663.1	32681.2	84292.9	37992.4	32123.1	54284.6	43861.7	42971.1	41950.1	42830.1	42225.6	41549.9
780	DG(18:1/20:5/0:0)	464.162	658.535	8994.92	8241.4	7789.55	7748.75	6185.76	6839.52	4457.66	17061.2	17903.2	6507.17	12301.3	7578.78	10501.5	9332.56	25693.9	11821.3	12110.4	20385.9	22995.8	23745.1	32147.3	57374.9	22721.4	35039.4	21855.9	18006	32574.4	23184.4	17125	18541.4	16940.3	17621	19476
781	DG(18:2/19:0/0:0)	537.365	652.583	4563.47	4524.53	3564.12	3870.94	3897.18	4121.22	2571.24	2876.23	3017.46	968.949	1861.4	1356.18	1573.72	1673.26	3546.34	1660.42	1779.57	3156.97	3584.97	2960.73	4943.72	6307.53	3030.67	4670.2	3167.84	2252.15	4436.37	2846.08	3466.3	3550.91	3552.73	3696.24	3498.98
782	DG(18:4/18:0/0:0)	477.392	634.535	11258.7	9571.33	8920.41	8479.9	7738.16	8191.34	5672.67	25678.7	25483.3	10955.3	17157.8	10397.6	14643.8	15202.9	30648.6	14126	14881.8	23370.3	27052.9	22695.2	33899.4	101578	41217.2	97548.7	40463.8	39827.7	76446.9	58580.5	25377.1	16919.9	26019.8	15532.7	17950.6
783	TG(12:0/16:1/15:0)	639.768	752.672	1121.34	1209.85	1218.84	1338.33	997.491	2262.31	643.393	4151.66	5010.21	1927.2	2885.26	2195.17	2077.14	2752.47	2671.68	1261.64	1469.65	2731.73	3399.73	3122.48	3786.85	11550.1	5066.52	20978.1	7987.91	4162.96	8805.11	8118.97	4352.03	4121.38	4183.52	4423.01	4507.54
784	PC(17:1/26:2)	535.153	882.687	1435.46	1451.74	1657.68	1483.34	1367.42	1458.09	900.775	858.317	920.239	395.797	629.17	500.958	657.911	619.345	1178.7	479.171	553.647	1054	1157.87	935.612	1613.89	1970.08	760.863	2008.19	907.981	798.072	1070.72	880.248	1109.26	1073.81	1377.34	1180.89	1163.31
785	Cer(d18:1/26:1)	601.507	676.645	2488.62	1284.69	1926.31	2320.38	3695.46	1763.15	2082.2	8777.72	11395.2	6873.13	8466.29	6063.2	9340.84	10183.7	19693.6	9392.32	11072.7	19844.9	20866.9	18121.8	28629.3	69016.6	27665	58596.9	30621.5	30590.4	42585.9	31525.8	21295.1	20436.8	20321.3	20336.8	19607.8
786	PE(P-16:0/20:1)	558.159	730.566	602.943	635.712	583.952	629.722	442.09	484.779	311.227	1658.49	1425.22	825.047	968.024	700.238	917.197	1015.71	1876.8	816.004	860.031	1905.63	1807.17	1416.14	2272.7	2287.26	1229.23	2021.15	1101.2	920.911	1489.77	1170.82	1177.72	1071.5	1115.17	1163.52	1117.26
787	PE(17:0/17:1)	367.78	718.532	49641.5	50525.9	49593	51020.8	42594.8	51378.2	30017.5	43779.1	58776.4	24944.2	35712.4	22245.6	42419.3	38743.1	47396.1	16615.6	23824.3	45921.1	42233.3	32747.7	59357	85802.6	40314.5	72885.3	37373.9	28672.9	52402.4	39380.7	53304.4	46985.2	48561.2	60805.2	52511.9
788	PC(O-16:2/14:0)	281.606	688.54	567.46	541.334	462.965	459.396	428.864	472.043	375.089	640.384	500.599	260.045	363.174	311.878	410.131	364.369	498.514	221.088	240.796	588.282	499.541	493.233	809.875	1299.76	420.37	1053.21	572.795	369.021	836.022	618.096	629.028	653.581	595.83	638.895	568.287
789	PC(18:4/23:0)	505.715	852.638	22053.7	23762.8	25182.4	27027	22330.4	27110.9	17177.7	24734.9	24272.4	11264.8	15080.1	11984.5	13040.5	15185.6	18007.8	6563.36	7080.45	15691.1	11948.2	12777.3	18881.7	36302.9	15956.9	24287.5	13838.3	13915.3	22633.9	14471.8	23460	21054.5	19999.3	18044.1	18034.5
790	PC(18:2/20:2)	381.565	810.586	142132	134176	134357	150402	117655	123625	84383.1	219225	212450	111531	155867	105843	157001	150432	284161	108583	136449	249467	271628	219372	339207	346455	139909	323731	164622	152981	230974	161410	187612	203557	183383	194969	190970
791	PC(P-20:0/12:0)	513.131	718.568	5163.52	4904.45	4082.18	6188.55	3881.12	4780.69	2368.55	4365.62	5060.46	2136.09	3447.34	4077.48	9162.75	9686.38	11068.8	2134.8	5688.64	4315.73	5741.83	9625.66	9586.96	24454.6	3701.41	7512.96	10016.8	9155.62	9071.34	10596.9	3795.78	4301.06	12848.6	4481.28	8574.06
792	PC(20:2/20:5)	466.153	854.569	8664.43	6171.55	11065.1	12694	8855.66	7215.05	3720.82	11050.7	8166.96	3448.18	7647.35	6197.56	5207.42	7950.09	7827.41	7578.71	7288	8351.66	12351.8	17108.8	15403.5	13945.7	9461.57	11169.5	10344.8	8804.53	14312.7	7158.23	11520	12865.8	11184.7	11725.8	9110.49
793	TG(18:0/18:1/22:4)	728.33	954.841	4497.6	5789.48	3635.23	6162.97	2763.66	3913.09	1605.08	8529.9	8285.89	4891.85	6380.91	4198.54	5081.43	5671.74	4947.05	6466.5	6787.57	9939.2	11308.7	4205.12	14025.6	7067.19	6740.07	9052.97	7001.43	6308.71	10147.3	4958.77	7389.75	4669.6	6829.99	7167.34	4084.55
794	LacCer(d14:1/24:0)	451.631	918.679	751.642	759.09	1095.14	531.557	636.022	519.837	533.929	2149.18	1249.02	681.841	1499.89	531.218	628.127	1930.92	810.143	280.124	384.863	861.011	1037.09	616.788	1720.36	1011.7	497.987	796.388	899.191	544.599	1107.66	702.051	998.032	1060.54	1124.22	1385.24	1406.82
795	TG(15:0/22:6/16:0)	717.863	882.758	221773	225462	241242	213614	163948	159853	100992	471242	514722	167890	330373	247035	319729	297841	408818	186637	190288	368219	292781	259970	446668	525031	253938	706805	283173	211848	382221	319536	280977	313401	288012	310855	298844
796	PC(15:0/18:0)	402.618	748.567	123647	129291	142228	138864	100925	95133.2	74440.8	22227.8	162290	62198.4	98683.2	61132.2	119888	116852	141683	57747.3	69645.1	127026	128453	113147	178062	278872	103990	206106	123070	113264	159809	112293	122885	145348	130266	117751	150585
797	PE(26:2/22:5)	549.129	902.66	1251.97	993.128	1238.39	1089.78	985.793	1166.65	774.871	2628.2	2530.31	1270.57	2112.68	1091.06	1563.87	1648.13	3164.43	1201.91	1310.71	2595.41	3231.75	2795.37	4051.97	3669.55	1821.83	3608.3	1972.59	1654.67	2458.02	1542.71	2170.97	1735.61	2252.91	1805.41	1622.8
798	PC(16:1/18:0)	385.817	760.572	1.30617e+06	1.24874e+06	1.2252e+06	1.20156e+06	1.15444e+06	1.18887e+06	775417	1.81705e+06	1.9832e+06	876931	1.28065e+06	900800	1.31837e+06	1.24984e+06	1.65121e+06	665533	813937	1.49238e+06	1.64305e+06	1.26644e+06	1.91567e+06	2.78364e+06	1.12755e+06	2.47674e+06	1.37624e+06	1.15962e+06	1.78808e+06	1.226e+06	1.71629e+06	1.66132e+06	1.67235e+06	1.56219e+06	1.63404e+06
799	LPC(16:1/0:0)	65.701	494.32	2480	2629.49	2308.37	3068.84	3003.26	3069.46	1774.56	22164.9	31651.8	11017.8	17874.9	10832.3	15519.3	16735	49450.3	12788.3	22887.9	35157.1	50620.2	33168.3	57581.2	48702.7	20446.9	36919.3	22631.7	21371.9	31910	19689	19284.9	18377.8	18407.5	18923.6	19010.3
800	TG(16:0/17:2/22:5)	718.901	908.77	104729	105454	109384	102295	83401.6	80866.4	48442.7	133343	105463	60390.8	68751.4	67479.2	94122.3	61347.7	105071	44408.2	55201.3	86619.5	83530.7	68349.9	127544	105627	52118.7	175206	57561.8	51225	102351	62633.3	67969	69830.1	71632.8	85872	71310.6
801	TG(12:0/22:0/22:0)	802.578	936.88	1244.36	1008.15	1232.39	1271.8	972.01	955.708	792.024	2964.31	3288.34	1598.38	2159.29	1362.75	1950.72	2428.69	4109.49	1590.72	2091.24	3857.55	2966.59	3413.84	4543.18	7485.45	3273.74	8913.64	5352.66	3715.07	6136.07	5176.99	4078.53	3495.11	3474.5	3201.85	3212.14
802	PC(O-20:2/22:5)	507.065	868.603	2315.06	2321.07	2347.12	2800.99	2549.72	3264.79	1638.8	2707.85	2719.44	1798.59	2345.4	1512.84	1855.73	1522.13	2803.67	963.972	1115.2	1922.63	2442.13	1793.73	10764.8	4932.57	2023.3	3941.26	2005.92	1953.42	3027.58	2028.6	2707.88	2614.11	2642.79	2772.56	3607.98
803	DG(16:0/16:1/0:0)	477.44	584.522	163960	168465	134128	142706	142969	144478	98056.2	380060	456395	148918	265940	168727	243040	223503	432747	210285	241444	386810	438619	352517	502778	750788	344279	590243	356701	270567	498878	294559	291056	309282	307654	316638	320052
804	PS(26:1/8:0)	436.162	784.507	1419.48	2191.45	1526.88	2293.11	1738.2	2630.8	1667.9	1760.87	1918.47	934.064	1464.78	751.857	1297.7	962.926	1617.84	350.5	668.093	1208.54	1803.92	1478.41	1528.9	3403.98	1700.07	2016.11	1377.09	1466.77	2003.82	944.857	1412.94	1247.02	1928.36	1310.99	845.275
805	Cer(d18:2/26:0)	588.6	676.654	2466.76	2079.32	1844.25	2169.21	1826.14	1743.53	1217.63	6835.12	7293.05	3216.59	4362	2881.3	3698.16	4581.4	8548.93	3886.57	4510.84	7063.9	8595.48	6632.75	10871.2	8783.48	4016.36	10476.2	3673.09	5828.28	8515.35	6118.89	5131.41	5991.24	5941.61	5116.25	5282.75
806	PC(O-16:2/24:0)	538.2	850.668	9949.76	10850	9046.15	7930.45	13259.5	10753.3	7606.49	4743.1	6681.6	2768.23	3777.21	2653.84	3960.16	4231.16	5084.96	2451.22	2859.04	4817.53	5949.81	4408.52	7592.59	7955.71	2917.95	8713.03	4331.4	3379.68	5153.69	3808.63	7070.25	7393.05	6730.33	7879.17	6930.89
807	TG(15:1/19:0/19:0)	729.125	892.819	8329.19	7057.67	6258.03	6380.07	5176.61	4342.32	3314.3	21409	20883.8	9579.07	14302.7	8753.63	10911.6	14164.6	13538.4	6327.02	6838.09	12249.4	11617.9	11975.5	18144.9	19111.4	9962.01	27487.5	11982.3	9202.19	16585.6	13387.8	13659.3	12971.8	13031.6	12676.4	13193.1
808	Cer(t16:1/26:1)	546.173	664.618	807.7	956.314	1190.3	1028.22	1397.4	1206.05	966.228	1670.42	683.706	633.607	1113.12	435.151	1006.76	913.98	1910.8	700.777	733.053	1847.68	1591.53	1742.73	2216.92	2694.13	1490.35	2589.39	938.063	1101.84	1588.42	1264.96	893.211	1180.02	969.984	1484.57	1375.38
809	TG(18:2/20:4/20:4)	653.899	944.763	580.611	395.497	598.305	556.215	673.956	434.139	331.356	1442.06	1408.94	868.469	1320.49	949.833	824.217	1144.88	1480.95	510.638	644.176	1397.62	1409.59	1154.45	3859.63	2722.17	1421.73	3493.64	892.02	726.982	2524.4	1880.69	976.961	992.227	1619.71	1631.84	2807.91
810	PE(22:2/10:0)	400.985	710.477	718.758	1411.25	1329.22	810.014	1989.13	629.624	243.798	939.657	993.676	497.824	739.809	357.777	528.514	1261.67	1165.73	476.421	687.556	1097.48	1073.99	662.73	2475.1	908.186	799.692	1780.25	821.123	720.957	1213.55	1664.38	781.778	1114.95	981.758	906.732	977.669
811	SM(d16:1/16:1)	249.339	673.522	2929.41	2718.18	2674.07	2556.46	2611.93	2532.56	1584.16	1593.56	1931.27	761.635	1434.18	837.218	968.11	1286.01	1561.81	492.118	674.091	1368.65	1222.15	1084.41	1433.27	3586.04	1486.91	3737.82	1387.2	1202.83	2270.09	1671.02	2612.88	2467.56	2429.97	2212.21	2804.5
812	Cer(d18:0/25:0)	615.018	666.675	1229.47	1330.18	1488.59	1787.67	1443.28	1976.42	1072.76	2478.42	2422.4	1275.79	1622.45	1382.76	1735.49	2144.34	3419.94	1350.75	1711.54	3439.78	3239.7	2902.85	4769.49	8480.1	3727.4	17906	3802.99	3938.22	5203.71	3822.04	3245.01	3074.55	2734.08	2523.89	2418.83
813	PC(26:1/16:1)	552.244	892.669	7178.02	5987.25	6648.17	6005.99	5743.19	5471.18	3962.82	3206.99	3818.1	1838.3	2578.55	1680.95	2898.04	2772.34	6998.23	2219.06	2682.58	4963.12	5447.6	4815.71	5495.18	12246.7	3958.56	9554.71	5007.64	4237.59	5516.35	4186.41	5261.08	5066.79	5528.2	4760.52	5317.1
814	TG(16:0/20:2/20:2)	701.027	928.822	3691.74	3374.59	3387.64	3189.88	2569.57	2244.56	1624.99	14305.6	13182	7822.62	10249.1	6491.38	8116.74	9763.5	10804.5	4484.01	5386.55	10312	10376.5	9502.11	14014.6	15955.9	7352.77	20082.6	8058.74	8230.21	11485.2	9719.26	10041.9	9449.3	10148.5	9869.66	8364.79
815	TG(16:0/17:0/20:1)	716.293	892.813	10038.1	10084	9132.62	8567.86	7654.17	7158.18	5081.88	46027.5	41937.4	22969.5	31485.2	21503.5	30580.7	30025.1	36993.1	18359	20452.1	37094.3	43304.2	40388.7	59989.4	69072	30424.2	74185.8	34695.7	28859.1	53592.7	38594.2	31287.9	31500.6	33204.1	32930.8	28588.5
816	TG(22:2/16:0/22:5)	714.464	978.845	3593.03	3998.96	4750.84	4019.42	7440.46	4905.38	2203.27	6215.97	7377.27	3951.92	3591.51	4451.45	4233.36	4420.3	7592.27	2735.43	3476.67	6609.57	9662.24	5569.32	14704.7	9199.95	8270.51	10202.7	4906.33	3374.9	7250.79	4716.25	4734.81	8748.19	4235.73	4502.4	9975.71
817	PC(17:1/19:0)	428.904	788.605	1.90328e+06	1.71221e+06	1.91681e+06	1.73808e+06	1.56698e+06	1.56063e+06	1.04721e+06	1.01554e+06	1.1477e+06	532930	807213	542954	816965	780080	1.2095e+06	513331	590674	1.09087e+06	1.24162e+06	925896	1.51829e+06	1.82272e+06	754741	1.74502e+06	917492	756402	1.17013e+06	814941	1.25166e+06	1.25041e+06	1.29683e+06	1.42962e+06	1.26012e+06
818	PG(16:0/16:0)	289.691	740.533	1464.16	852.381	842.166	1017.22	659.536	741.619	467.273	1849.5	2025.5	678.008	1297.24	787.116	1357.14	1236.87	975.103	392.817	422.084	1156.93	839.09	805.124	1076.2	2885.35	1132.19	2908.25	1434.45	1264.92	2279.69	1245.81	1512.99	1422.09	1197.95	1450.62	1458
819	PC(O-22:2/18:1)	513.058	826.661	9854.78	10974.8	9421.82	9436.21	9136.32	7603.56	5101.01	8962.16	9437.51	4139.82	5997.19	4255.09	6597.42	6193.89	9951.62	5544.7	4258	9145.54	10108.1	8295.97	10343.6	14781.4	7050.31	11663.5	7137.5	6060.79	7889.02	5860.35	9082.16	8740.76	9843.1	10058.7	10342.5
820	PC(5:0/18:0)	103.483	608.423	219.312	253.711	300.463	402.257	216.821	355.164	167.117	443.922	379.039	200.001	295.84	194.029	297.095	269.886	675.312	270.348	251.999	1418.96	780.331	609.602	765.234	824.485	465.3	744.509	359.051	308.678	543.701	460.836	308.298	452.363	474.667	473.011	423.94
821	Cer(d18:0/18:0)	481.134	568.552	3871.96	4781.76	4308.16	4447.26	4615.15	4320.06	2606.5	6869.13	18645	3481.67	5128.07	3055.86	4071.84	5057.19	5420.03	2479.31	2883.95	4849.18	6693.64	5012.26	20451.9	5569.51	2788.32	17450.8	11452.4	2964.2	3793.81	2713.92	11828.5	4360.12	3846.64	3768	4092.36
822	Cer(d18:0/22:0)	557.048	624.616	2305.85	2680.08	2240.12	2270.92	2091.75	2084.37	1305.34	9789.62	11770.6	5269.4	7026.37	4606.9	6470.27	7695.27	14184.3	5181.83	6196.43	12676.4	14850.2	11564.4	18043.6	14863.4	6412.91	11647.9	6401.74	7006.91	9523	6676.57	8436.14	8648.37	6560.22	8331.95	7683.55
823	PC(P-20:0/14:0)	549.662	746.599	4481.82	4352.47	4622.28	4199.2	3668.84	3184.33	2485.01	4563.25	11070.7	2382.49	3436.92	2914.99	7609.73	6691.4	4848.03	2253.11	2454.48	4334.82	5709.39	4731.32	11941.9	11011.5	3175.13	8666.88	3879.74	3856.72	5421.89	4711.92	4633.22	4544.31	5065.97	5085.5	5162.89
824	PS(26:0/14:1)	484.589	868.602	5465.41	5101.98	4849.78	4470.45	5043.69	3782.64	3387.06	4227.49	4165.78	2049.54	2993.74	2672.2	3076.91	3261.57	4352.61	2026.9	2310.83	3567.97	5348.53	3312.56	6754.57	9415.69	3723.53	8489.48	4644.04	4322.99	5434.11	4066.04	5128.9	5579.89	4494.96	4906.68	4708.17
825	PS(22:4/17:2)	274.674	822.53	2406.72	2640.89	2442.67	2411.47	2058.69	2124.88	1422.52	1880.93	2298.54	905.29	1476.85	934.139	1852.67	1322.98	2414.2	832.853	1081.39	1924.36	2353.67	1584.4	2569.56	2319.08	1078.29	1902.24	1070.55	1082.31	1546.5	1021.92	1923.92	1990.17	1927.52	1914.89	1844.17
826	Cer(d18:0/26:0)	628.557	680.688	881.042	812.387	4755.05	1075.39	1069.75	1047.05	760.446	2132.85	2031.73	1319.06	1660.68	1489.83	1695.55	2070.71	3567.99	1548.21	1801.37	3530.16	2909.81	2930.33	6543.07	11645.5	4470.01	9809.74	5617.2	5107.1	6850.25	5467.36	3801.49	6046.2	3619.65	3450.38	3333.33
827	Cer(d18:0/23:0)	586.909	638.641	1690.47	1965.84	2205.04	2538.94	2236.54	2504.39	1522.26	5727.31	6547.91	3713.85	4683.42	3856.18	5140.42	5521.33	10019.8	4062.59	4929.29	9225.15	9789.25	9637.16	12327.6	36849.2	15110.8	29562.6	18269.6	19392.6	24481.4	17345.2	11506.6	10480.6	10479.4	10723.1	10180.3
828	TG(18:1/22:4/18:1)	692.957	952.818	2230.65	1934.02	2401.62	1970.52	1506.45	1375.98	904.122	6383.22	5420.33	3394.1	4738	3193.84	4191.31	4397.65	5226.41	2363.55	2781.72	5412.52	5135.5	4302.27	7401.53	6793.67	3364.43	10812.6	3877.32	3434.51	6101.22	4557.08	4645.78	4152.59	3775.02	4393.72	4493.4
829	TG(16:0/20:4/16:0)	750.286	872.769	2419.23	2384.01	2423.03	3015.26	2521.01	2870.13	1918.36	9226	8554.97	4424.32	6599.33	4022.41	5849.07	7634.62	11745.5	5957.58	5882	12345.3	9672.03	9823.37	14731.8	18044.9	11163.1	20091.4	11241	10546	13939.8	10966.9	9724.87	8904.7	8298.03	8196.07	8861.96
830	PC(17:1/18:0)	406.832	774.586	98019.4	89278.8	91802.8	91941.3	83883.5	76653.1	55840.8	43188.4	51470.4	20528.1	32524.8	21302.7	35466	29111.5	46163	18168.2	22196.1	45122.9	47037.7	33774.5	52236.5	65607.5	24180.2	78112.4	33414.9	29167.1	44820.1	31555	55064.5	60041.5	68183.4	63724.2	62968.5
831	PC(20:1/20:3)	429.744	838.617	20759.3	14832.1	16126.3	14821.4	11382	12489.1	12657.2	38545.8	41574	20285	30887.4	21742.7	30044.7	32723.6	48184.3	21452	24750.8	41761.8	48998	37701.7	60731.6	74390.9	27438.3	57394.2	30926.6	31234.6	46058.4	40467.1	33230.7	33228.4	33522.7	33597.5	33253.5
832	TG(20:1/18:1/20:3)	819.737	954.846	920.63	2384	3133.2	1478.26	2405.76	3157.32	524.662	1072.57	1486.74	616.859	938.024	774.746	803.48	986.452	1495.68	650.454	840.606	2077.95	1549.91	1349.32	2028.77	3163.61	1213.79	3856.78	2051.87	1413.08	2363.09	2038.38	1451.07	1582.27	1640.51	1546.19	1368.69
833	Cer(d18:0/20:0)	536.813	596.594	1718.55	888.45	1146.12	1610.96	2561.6	1530.65	1285.63	27655.6	36720.2	17745.5	24093	17284.9	24449.3	27533.1	37036.3	17159.2	20034.2	33098.7	41074.3	33085	46765.7	127316	51400.6	101949	65609.4	72009.5	88269.8	59557.9	43482.4	41308.2	40196.9	41836.8	40708.3
834	PE(O-20:2/20:4)	417.567	778.562	15373.2	14855.5	17076.2	15594.6	13559.9	13499.7	9411.99	11662.7	14322.2	6837.29	10701.2	17537.9	10264.3	7828.29	15573.5	5648.61	8449.3	12528.6	21946.4	9286.78	46052.7	22851.8	9104.84	26946.7	11118.3	13091.2	19420	12049.3	12149.6	12030.3	11150.5	11944.7	12781.2
835	LPC(14:0/0:0)	63.174	468.304	594.454	617.03	590.017	782.384	605.74	850.169	372.555	1518.5	2155.44	729.114	961.734	633.227	806.041	899.669	2497.41	877.965	1260.1	2535.21	2514.24	1873.29	2954.06	5815.64	1449.31	3081.96	1769.24	1430.41	2540.66	1423.71	1471.43	1357.55	1387.42	1475.16	1463.63
836	TG(18:1/17:1/22:5)	716.003	936.825	1471.77	1554.01	3956.38	2332.85	1714.2	1321.26	909.411	3223.67	2633.6	1525.26	2513.22	2249.44	2878.69	1821.73	2787.12	1406.79	1479.76	3005.46	2902.14	3451.69	4517.82	3007.79	1108.45	4285.02	1622.77	1371.45	1445.88	1359.19	2590.16	1845.58	2347.78	2074.53	2385.56
837	PC(P-16:0/11:0)	266.295	648.49	826.431	790.081	873.75	726.07	857.35	852.809	553.24	766.366	841.283	347.665	603.562	414.695	568.496	529.411	847.394	369.898	368.385	881.774	898.457	677.112	1063.06	1640.07	413.117	962.916	489.947	466.234	650.181	426.842	770.983	735.875	805.681	763.987	719.541
838	Cer(d18:2/25:0)	574.953	662.638	1942.46	1667.03	1623.44	1551.3	1258.41	1368.35	821.961	2825.21	3053.69	1275.76	1898.31	8106.45	1618.46	1799.11	3001.81	9629.24	1456.58	2645.61	3219.63	2694.13	4113.33	56671.3	23684.8	4992.73	1741.35	1771.65	34118.9	1159.09	23432	19256.4	1748.15	1657.68	18781.6
839	TG(16:1/22:5/20:1)	756.822	950.815	2783.34	2699.05	2934.82	2638.7	2371.96	2090.83	1396.28	2712.75	2747.65	1407.15	1958.95	1385.49	1702.03	1629.77	4209.85	1327.81	1298.58	2783.57	2568.46	2243.26	3899.59	6246.02	1556.38	5416.4	2017.09	1706.13	2640.94	2108.38	3299.8	2000.83	2163.65	2001.08	2224.24
840	Cer(d17:1/24:4)	513.188	628.581	755.446	716.257	352.372	836.283	839.614	688.912	524.41	1863.3	2991.23	1430.72	1894.69	1605.44	2266.21	1982.08	4767.72	1956.75	1187.56	3659.92	4853.22	3414.7	5318.54	7062.79	2763.38	5901.69	3729.31	2600.72	4495.25	3192.27	2436.31	2373.08	3049.89	2647.61	2794.39
841	LPC(20:4/0:0)	66.824	544.335	649.812	1135.2	1129.4	989.169	841.854	1519.83	779.578	3734.34	4447.38	2001.96	2792.95	1953.51	2429.97	2610.23	7754.87	2168.41	3696.83	6757.32	7547.23	5865.55	10383.8	7247.03	2709.03	5391.22	2903.47	2631.77	4118.04	2642.37	3179.55	3155.63	3067.82	2927.93	2889.64
842	LPC(17:1/0:0)	73.122	508.335	368.465	541.643	426.487	472.922	408.244	435.817	321.075	1583.13	2027.66	915.78	1162.79	682.616	1022.07	1050.07	3062.61	883.156	1291.55	2758.35	2959.5	2063.5	3843.06	4494.73	1565.2	3113.21	1521.98	1487	2193.13	1637.42	1444.25	1381.99	1366.4	1399.96	1354.49
843	PC(P-22:0/17:2)	506.103	812.653	3291.57	4224.17	3385.9	5428.56	3282.69	3844.66	2860.51	6380.03	3764.57	3577.24	2329.02	3392.82	9597.05	1781.36	8857.26	3362.33	3415.55	1787.21	8333.21	7324.92	10715.3	13716.3	5627.65	12821.4	6386.84	1527.87	2522	6211.7	6657.03	6475.42	6530.56	2335.18	2073.49
844	LPC(17:0/0:0)	93.7445	510.351	456.517	413.43	500.583	483.137	598.617	375.503	317.059	904.162	1792.17	828.916	849.82	503.997	865.194	649.41	1221.47	801.352	557.329	1210.61	1106.21	1055.18	1216.61	5673.45	1134.19	2769.17	1413.49	1736.01	1926.63	1199.3	1043.34	1646.02	1516.64	998.762	1057.42
845	LPC(20:3/0:0)	89.62	546.347	412.362	571.396	797.201	528.648	371.365	717.012	305.571	861.769	777.489	427.271	614.981	413.523	619.09	688.772	1280.79	470.846	524.765	1259.58	1122.12	1004.97	2010.87	2396.31	880.417	2211.82	925.255	811.044	1190.06	855.837	918.975	798.804	920.387	865.922	821.135
846	PC(O-16:2/22:4)	397.424	792.584	654827	588162	553998	515512	422441	399436	287681	954293	945652	446929	658797	408713	622922	665371	506003	207952	250815	424326	456155	360225	514329	644030	280205	594132	308440	288705	437115	302291	624295	560209	596720	575493	585971
847	TG(18:2/20:1/20:1)	723.205	956.858	1860.54	2274.42	1984.29	1588.25	1295.19	1073.01	757.95	3802.58	3659.22	1956.24	2870.97	2000.12	2484.04	2566.94	2891.72	1532.44	1889.23	3269.17	3536.34	3205.22	5887.85	5404.2	1794.85	5751.5	2426.08	2059.56	2876.89	2673.05	2269.59	3018.66	2655.92	2818.12	2690.1
848	PE(22:5/17:0)	466.856	802.555	4671.32	4213.58	4674.68	4534	4844.58	3776.98	2849.98	11911.3	21999	9869.9	7741.41	5443.55	7269.22	7287.57	25851.9	6876.31	7583.07	15374.7	17205.5	16003.5	22721.6	22791.2	10150.3	21703.2	10073.2	9816.42	14015.5	10438.8	10456.4	10166.4	9615.17	9644.4	7450.12
849	GlcCer(d18:1/24:4)	475.745	804.626	5233.79	6183.94	6940.3	6643.08	5704.76	6023.47	3919.62	40392.4	52776.2	27259.1	34183.4	24228.6	34796.4	33254.5	43857.1	19536.9	19990.3	38110.5	50997.1	37359.8	54336.1	55903.1	17834.5	46035.8	24015.8	23495	31236.4	23621.6	28314.4	28961	27488.7	27401.9	27781.9
850	LPE(P-20:0/0:0)	106.96	494.358	494.978	557.871	593.708	720.42	570.965	559.612	334.733	1026.7	1190.93	408.331	658.156	612.375	635.158	580.775	899.408	432.114	403.696	1393.33	1027.89	632.798	1506.47	913.967	491.695	1199.43	458.626	597.532	706.335	505.989	676.448	578.456	925.954	841.776	450.582
851	DG(18:4/22:1/0:0)	518.166	688.582	4129.88	3853.9	3163.17	2906.59	3100.98	2798.5	1909.03	5106.22	5000.08	2015.83	3416.26	2111.05	4143.63	2934.01	6851.85	3031.89	2944.02	5488.75	5646.38	5112.8	6581.59	17812.4	4986.5	9605.33	3694.28	6036.62	5227.52	5096.51	4569.75	4865.74	4903.99	4836.96	4629.56
852	PC(O-18:2/20:3)	413.425	794.601	573474	536972	576523	538993	442309	433429	321876	867058	789277	428395	633882	405101	607244	586395	655472	266661	334638	575522	637783	529862	812138	771033	307773	607709	342406	321864	514340	346764	610110	587960	577289	599765	554748
853	TG(16:1/22:1/20:1)	742.749	958.868	3231.59	2625.43	2769.46	2703.88	2386.9	2186.3	1374.57	3963.63	4075.99	1773.41	2711.47	1784.78	3559.65	3209.63	3225.25	1450.36	1754.06	3329.62	3373.74	2914.42	4960.78	4372.87	1638.68	5617.45	2510.95	1368.42	4206.58	2565.81	3208.92	2977.41	2942.71	3203.81	3454.43
854	TG(17:2/17:2/19:0)	742.258	886.796	7774.5	6952.65	7821.64	6963.1	5939.68	5420.04	4087.39	27012.9	31140.7	13795	19295.1	11929.2	17462.9	18941.6	24959.5	13786	14425.6	24599.1	26201.2	25269.8	41015.3	36712.2	17370.2	42496.1	19934.7	17215.9	26606.1	23051	20520.4	18143.9	18748	20161	18100.5
855	GlcCer(d18:0/24:4)	490.89	806.641	4003.72	3849.87	3719.94	3491.17	3245.23	2587.17	2255.33	6688.24	8250.37	4298.34	5844.64	4086.56	4109.69	5730.33	6942.9	3138.93	3694.2	6335.65	8698.84	5850.44	9709.93	18421.9	5793.39	11723.1	7838.79	7242.02	10677.9	7181.94	6784.46	6750.98	6763.52	7061.48	7225.77
856	PC(4:0/35:0)	504.428	832.684	3976.04	3607.88	3445.33	3019	3128.06	3391.14	2491.63	3838.07	4106.34	960.572	3125.72	2170.57	3003.14	2675.95	3950.71	1703.37	1668.96	3052.28	3705.75	2457.33	4481.12	11014.8	3905.79	8931.98	4680.71	1158.46	6327.34	4580.86	4311.35	4284.97	3910.85	4486.77	4475.25
857	LPC(22:6/0:0)	64.782	568.334	426.926	495.683	438.678	1060.7	561.369	576.109	576.385	1661.82	2817.28	845.605	1348.09	794.717	1141.71	1151.53	3912.27	1218.82	1754.06	3270.1	3721.46	2751.24	4505.27	4714.85	1294.29	2349.94	1366.22	1287.39	2059.01	1258.27	1611.65	1481.51	1425.74	1617.64	1487.18
858	Cer(d18:0/24:1)	557.082	650.631	15417	12624.1	11962.7	5615.08	4276.66	3779.18	2775.21	19468.6	20357	8522.51	12522.9	7745.89	10215.1	11595.4	23435.7	9417.77	10537.2	20401.3	26824.2	19721	29858.4	29291.5	13312	21860.6	11834.2	12327.2	17158.3	12871.9	14676	13952	14860.9	14488.5	14185.3
859	PS(28:0/14:1)	524.037	896.634	3659.37	3563.96	3723.97	4127.79	3490.97	3458.69	2709.41	2800.06	3040.65	1047.22	2097.06	1458.69	2000.39	1833.01	3461.15	1253.29	1547.85	2881.09	3026.01	2713.41	3874.36	6483.47	3402.98	6045.24	2909.05	2448.86	4158.37	3148.43	3774.52	3710.63	3542.93	3428.9	3416.41
860	Cer(d18:0/24:0)	588.798	652.648	3658.13	3544.42	3481.6	3429.46	3135.82	3069.94	2006.55	14323.2	16049.7	7483.38	9343.2	6577.15	9835.62	10525.8	20846.1	9155.66	10657.8	18393	21548.5	17505.7	28407.2	23353.7	10185.3	21189.8	11146.9	10917.3	15896.2	10640.5	13181.1	11919.5	12688.9	11774.6	12626.2
861	Cer(d18:0/26:1)	600.471	678.67	652.717	503.634	700.798	457.854	893.244	599.962	908.643	2868.98	3237.99	1994.45	2643.92	2188.69	2251.65	3038.3	5072.95	2508.15	2935.3	4633.64	4487.38	4778.65	6546.61	19594.7	7950.33	14840.6	8326.92	9060.6	10519.9	8316.6	5472.23	5189.75	5314.03	5290.23	5435.15
862	GlcCer(d16:1/16:0)	327.043	672.535	688.541	605.698	567.921	531.715	523.62	470.065	355.343	1767.78	2776	790.115	1554.99	874.161	1218.31	1430.54	1730.15	593.147	669.442	1411.5	1603.09	999.267	1640.33	3228.97	1287.11	2687.9	1100.23	1238.36	1905.86	1503.82	1678.56	1496.78	1645.1	1038.13	1532.86
863	TG(17:1/16:0/22:5)	742.395	910.787	107479	100637	102235	85459.4	73687	60592.8	41916.4	214678	168865	82105.5	106301	80203.7	102835	88309.9	124878	63521.6	45813.1	119369	138063	118712	200103	178412	83855.9	243546	95812.7	65678.2	132815	104261	101200	100305	104422	138483	98014.5
864	PE(29:0/3:0)	426.408	714.499	2308.36	1673.72	1535.96	2251.07	1836.55	1426.73	1957.36	4815.43	5016.37	2614.4	3684.9	3754.77	3810.53	3405.89	8532.82	3833.76	4293.91	8824.24	9993.5	8529.56	14858.4	12957.7	6394.92	15933.4	9550.36	7563.21	11470.7	5965.83	6931.96	6060.26	6716.68	4296.9	5960.15
865	LPC(22:5/0:0)	69.06	570.35	385.652	444.308	493.958	514.254	416.622	495.935	277.653	1850.56	2505.48	891.427	1407.55	902.495	1218.85	1260.73	4103.4	1185.38	1818.11	3393.38	3654.74	2767.09	5026.1	5713.05	1773.34	3439.64	1903.67	1648.12	2505.15	1818.38	1590.22	1596.66	1738.16	1643.19	1645.91
866	PC(P-20:0/15:0)	568.988	760.634	1447.45	1354.79	1426.65	1465.82	1297.93	1419.31	669.749	1947.05	1931.19	1029.06	1437.98	1092.62	1567.61	1359.82	2135.58	871.46	1066.45	2109.97	2465.76	1773.86	2800.27	2133.99	1158.01	2192.07	943.135	1969.38	1553.28	1929.33	1839.41	1766.01	1703.41	1791.94	1765.52
867	LPC(20:5/0:0)	60.249	542.318	216.069	179.19	243.749	290.472	224.45	277.994	154.124	870.996	1246.64	453.23	1187.57	447.586	482.144	617.148	1873.06	613.222	874.464	1459.39	1697.82	1375.42	2759.13	2374.87	757.177	1117.59	655.262	591.999	959.33	750.748	751.884	735.682	773.927	665.66	704.231
868	SM(d14:1/24:0)	550.014	781.623	719.557	778.73	854.669	888.377	700.12	820.303	527.002	1337.44	1220.02	687.238	1055.8	601.198	985.574	856.196	1595.57	711.621	667.998	1909.56	2128.88	1573.82	2617.34	2699.58	1304.42	3355.65	1417.79	1110.32	1559.12	1954.35	1153.66	1779.08	1291.96	1134.75	1272.76
869	LacCer(d18:1/22:1)	452.568	944.696	3146.26	3379.51	4001.86	2977.05	2478.1	2218.3	2117.13	4232.02	7350.77	3548.57	4629.43	3104.55	943.625	2584.69	5711.79	2546.89	2852.84	4525.67	2658.8	2621.39	2970.59	7302.51	2470.02	2937.79	3257.84	1991.37	4106.74	3187.49	4999.98	2584.13	5007	4572.62	4527.84
870	TG(20:2/16:1/22:1)	723.217	956.872	904.912	1328.53	907.401	1134.39	712.838	823.884	581.016	2882.39	3363.06	705.13	1791.68	1961.1	2400.32	1974.94	1711.87	814.776	1221.72	2899.66	2518.5	1751.86	3889.22	2354.64	1111.55	3092.2	898.261	1077.41	1923.66	768.717	1341.2	1688.18	1353.13	1591.46	1518.04
871	LPC(20:0/0:0)	159.018	552.398	218.093	174.22	217.295	233.934	163.056	208.418	164.359	598.834	723.175	258.063	409.271	263.607	487.504	493.649	625.695	284.138	348.643	706.659	581.294	583.447	710.259	2276.75	842.502	1635.32	831.814	739.865	1108.55	819.148	713.417	604.592	715.467	604.251	642.96
872	PC(16:1/20:1)	392.035	786.588	291589	264766	261567	228660	229985	232968	163711	224667	238837	101878	170297	108791	164406	160840	229901	86840.8	110971	200357	216591	162385	263499	304798	123834	255274	315278	127073	185049	266655	223676	228419	220701	230851	206559
873	PC(20:5/20:5)	385.915	848.533	18014	21596.3	25465.8	23511.7	19951.5	25689.8	11715.3	22455.1	32180	14126.8	14906.1	17686	24178.1	15106.7	21052.8	18248.3	13626.8	28052.6	52717.1	28945.8	54456	65490.9	21767.7	50786.8	16277.7	17808	28529.6	21826.8	18071.3	13373.5	24793.9	17833.2	18106.3
874	TG(22:4/15:0/22:6)	739.406	958.764	1353.65	1437.51	1518.43	1467.21	1001.36	1130.94	758.811	1398.71	1663.53	768.121	1002.58	797.514	1152.33	1002.22	1948.82	679.614	663.683	1434.43	1875.66	1276.07	2752.71	2137.84	677.746	2501.36	1098.23	655.501	1397.18	1004.32	1094.32	1140.24	1222.53	971.621	903.656
875	MG(38:0/0:0/0:0)	613.197	639.614	544.174	668.847	482.429	544.31	379.389	388.022	236.657	620.056	550.699	361.855	452.574	213.857	324.93	385.107	1000.26	279.27	327.722	875.98	773.388	868.461	856.67	1358.22	559.308	1055.69	534.325	494.842	647.201	532.185	426.231	659.345	450.293	477.653	644.704
876	PC(20:3/17:0)	487.505	820.581	1664.09	1560.98	1274.09	1028.99	1202.7	1066.2	895.035	1991.04	2442.36	906.448	1516.48	753.406	1300.1	1459.15	1638.78	717.164	844.587	1448.26	1774	1449.64	1962.84	2054.72	1134.29	2333.08	936.225	1141.99	1304.17	998.55	1341.14	1098.2	1417.92	1714.39	1162.92
877	GlcCer(d20:0/24:4)	548.819	834.674	34468.1	27846.7	35723.2	27799.8	26899.1	22785.7	15834	66647.2	95623.8	43714.3	57189.9	37276.5	57375.7	59359	86887.1	38784.7	42205.3	72288.1	113046	83921.2	114629	86063.4	31325.9	85131.5	43108.8	38903.7	57687.9	42386.2	62395.8	55592.7	62475	57567	55854.5
878	MG(36:0/0:0/0:0)	584.207	611.583	1106.52	983.675	835.762	943.273	956.859	964.049	473.092	1447.71	1392.98	501.984	857.534	683.068	777.097	782.167	1984.56	745.658	863.42	1525.49	1768.36	1531.21	1916.61	1635.74	739.393	1634.24	799.65	696.424	1074.74	836.68	1186.9	1039.85	1028.14	972.712	1148.87
879	GlcCer(d18:1/25:0)	564.178	826.705	304.571	413.205	344.628	443.578	262.666	490.778	241.106	542.165	722.674	403.046	547.273	247.936	273.713	516.596	825.588	412.299	408.723	729.499	858.18	523.49	1204.89	1824.75	266.094	913.224	664.932	410.208	763.373	552.753	417.234	687.305	619.449	728.056	706.448
880	Cer(d18:0/16:0)	374.689	540.53	2214.87	1558.52	2308.16	1662.02	1790.89	1555.6	1136.93	2257.99	2355.63	1564.25	1226.35	1911.94	496.712	2034.38	2800.59	1058.33	985.206	2733.04	2998.3	1112.88	3846.07	4908.25	2233.17	3527.72	2045.74	1951.53	2946.35	1815.1	2165.79	2486.94	2479.92	2317.52	2503.71
881	TG(22:0/16:0/22:1)	840.239	990.926	1323.64	1120.58	1248.65	1171.75	984.642	715.911	653.011	1072.37	1166.26	623.955	750.87	514.117	783.136	867.54	1512.48	650.454	814.471	1365.63	1757.12	1247.77	1794.71	2842.69	1281.5	3397.48	1712.02	1179.42	1909.43	1882.77	1606.84	1446.37	1399.7	1360.88	1354.44
882	MG(34:0/0:0/0:0)	550.804	583.552	8483.46	8654.3	6024.7	6285.61	6185.83	5330.68	3464.25	10308.1	11131.2	4156.13	6926.23	4621.66	7905.74	6991.38	15723	7379.89	8065.95	14230.3	17017.1	15761.6	22986.7	15706.3	5885.07	10798.7	5999.13	6074.85	8668.07	5387.76	9833.76	10424.9	9689.06	9785.03	10033.4
883	TG(22:0/16:0/22:2)	802.566	988.911	1924.56	1769.56	1966.09	1773.09	1814.42	1273.05	1013.47	1353.45	1458.22	718.564	1442.48	713.082	949.541	1059.37	1572.13	726.3	830.804	1585.54	1825.65	1420.84	2060.89	2755.18	2031.48	4445.24	1682.92	1037.46	1863.53	1724.39	1701.18	1509.23	1446.98	1450	1387.1
884	Cer(d16:0/24:4)	500.668	616.56	2260.9	2277.28	2148.04	2120.83	1760.7	2026.09	1288.44	6643.52	6317.94	3395.26	4251.15	3652.86	4390.78	4337.93	7431.68	3222.11	3784.88	7404.49	8853.81	6108.44	10239.5	18974	6989.85	11137.6	8690.16	8671.25	12418.2	7740.09	6340.73	6123.43	6110.33	6233.73	6220.17
885	MG(32:0/0:0/0:0)	483.199	555.53	408.021	384.957	372.125	378.722	376.387	355.453	230.334	1933.16	2360	1034.59	1625.43	987.904	1345.64	1444.74	3127.75	1321.71	1545.86	3786.08	5693.48	2808.86	4554.49	1199.98	591.982	1215.05	540.766	676.748	721.623	536.742	1481.5	1223.47	1207.9	1479.33	1349.83
886	TG(21:0/16:0/22:2)	820.03	974.902	1044.98	972.778	1050.57	979.035	957.348	847.503	534.548	876.966	1073.76	456.336	661.683	450.973	578.566	650.422	1117.53	414.738	543.492	997.59	1302.98	977.175	1807.74	2464.92	871.533	2494.65	1344.98	876.214	1504.98	1430.75	1067.59	1047.25	1128.3	1142.04	991.342
887	LacCer(d16:2/27:0)	508.617	986.741	549.127	496.781	683.785	1467.88	534.898	522.858	323.215	471.488	637.309	263.997	437.597	329.212	258.505	431.856	475.651	270.476	324.261	557.012	568.298	498.967	669.615	1081.66	411.219	855.414	391.514	459.326	526.203	317.843	623.541	469.839	478.513	489.398	540.966
888	PE(20:2/18:2)	354.869	768.556	23125.8	19936.5	18861.5	19779.3	18359.6	17098	13535.8	42270.6	41840.3	18125.1	30194.6	19472	27731.4	30279.4	29982.7	10775.8	13130.8	22748.8	22456.8	19936	31255.5	43306.2	17543.6	33742.6	35574.2	17509	29124.7	19321.7	27496.4	27890.5	27325.2	27950.2	27658.6
889	PC(17:1/20:1)	415.947	800.602	10528.6	20026.5	23011.1	20420	6862.32	18950.9	1234.3	7638.53	16604.2	7351.42	5938.41	8131.34	11306.1	13600.5	17667.1	7299.17	8269.55	16959.9	15971.7	16316.8	27924.8	30121.9	12606.9	25764.7	14225.5	11358.1	16077.5	12997.4	8643.31	17001.4	16109.6	8365.1	11560.2
890	MG(31:0/0:0/0:0)	436.565	541.524	419.949	795.174	602.113	580.124	367.996	448.218	278.828	5238.39	5021.55	2238.35	3015.12	2077.2	3114.42	3229.85	4622.99	2455.86	2733.17	4715.08	6892.98	4678.82	6389.89	8318.82	4198.08	6319.87	3788.68	3930.37	5411.09	3817.11	3669.35	3482.11	3674.89	3273.34	3473.18
891	LPC(25:0/0:0)	258.201	622.475	2492.09	2487.9	2682.96	2670.71	2626.24	2800.61	1881.25	3493.77	3911.08	1868.65	2765.36	1954.69	2805.65	2666.61	4174.18	1572.31	2021.75	4011.55	4103.54	3123.08	5053.53	6611.54	2462.22	5073.03	2475.75	2421.13	3596.71	2494.31	3237.79	3189.58	3160.91	3149.3	3240.84
892	PC(O-18:2/17:1)	399.826	756.583	3524.84	2595.03	3733.05	2285.22	2923.77	2288.08	1515.21	3814.12	4180.18	1468.29	2918.87	1417.03	2705.6	2805.16	3036.46	1193.01	1803.78	2248.9	2516.38	1689.73	2717.38	5240.59	2066.63	4342.2	2653.06	1447.17	2564.14	1607.06	3702.75	3928.7	3633.59	3007.74	3498.24
893	SM(d15:1/20:1)	279.407	737.545	273.163	245.88	254.376	282.076	221.88	272.963	170.545	302.077	326.447	164.67	250.873	155.116	262.729	184.946	312.391	127.745	162.706	315.614	347.261	253.159	399.828	1465.24	555.046	978.622	476.576	524.722	834.829	503.85	361.411	373.195	336.388	389.053	317.99
894	Cer(d18:0/20:1)	500.869	594.575	459.723	507.511	381.552	533.399	389.378	592.667	408.63	4087.26	3932.7	1904.84	2914.06	1882.95	2541.52	2756.78	4215.6	1503.63	2067.74	2817.08	3817.94	3588.33	5283.41	10862	5700.26	9147.1	5149.99	4717.27	8018.01	4669.25	3906.32	3391.31	3364.39	3510.39	3992.93
895	DG(16:0/22:4/0:0)	558.87	662.567	754.912	722.377	651.111	847.888	745.13	789.204	570.593	3685.15	3660.85	2055.53	2592.78	1822.1	2684.27	3169.78	4576.4	1894.13	2036.22	4367.44	4959.76	3702.72	6717.38	5547.77	2528.06	5514.64	2689.88	2430.37	3286.54	2735.51	2919.15	2613.68	2465.82	2426.07	2574.07
896	Cer(d18:0/19:0)	484.02	582.588	591.98	624.762	487.11	583.785	574.25	586.102	426.401	942.348	971.154	459.558	661.331	451.851	606.966	661.67	973.273	319.139	401.309	670.137	847.981	755.286	1083.31	1653.29	995.383	1552.28	318.728	278.628	705.077	646.34	889.732	573.854	575.41	576.902	527.646
897	TG(18:0/15:0/20:4)	723.102	886.805	7374.35	4858.45	5765.03	11010.6	4245.64	2779.53	1501.19	33061.2	33113.2	17436.9	23413.5	14074	18666.8	22523	23685.2	11197.8	12442.1	22130.2	24375.7	22207.8	33465.2	15243.6	9838.48	19373.9	9863.13	9513.09	13182.8	10945.1	16296.8	16151.6	16104.4	15367.9	16341.9
898	TG(22:0/18:0/22:2)	840.618	1016.94	810.004	725.677	826.2	782.03	581.715	571.255	412.879	468.053	461.061	257.973	306.11	215.11	358.01	377.333	699.451	292.606	277.198	650.829	787.463	557.327	768.985	1278.78	540.293	1256.75	487.665	433.644	714.588	675.852	739.82	559.784	650.305	612.994	590.983
899	TG(21:0/18:1/22:2)	820.505	1000.92	630.646	635.443	587.541	666.222	553.892	507.574	329.527	543.528	508.031	282.405	331.015	272.844	385.682	391.703	621.195	315.266	314.157	590.728	835.533	575.506	1020.2	1110.37	403.015	1078.44	433.45	387.272	637.117	581.74	520.267	472.8	625.826	464.374	552.126
900	SM(d14:0/24:0)	569.521	761.64	1232.57	1099.17	1173.29	1138.59	964.978	1007.67	607.979	1591.79	1647.73	768.959	1155.71	818.296	1273.7	1050.02	1692.19	710.821	907.6	1683.82	1819.3	1279.19	2515.18	1348.65	629.455	1839.81	1295.38	614.188	1103.75	815.5	335.811	1383.39	1270.5	1267.16	1385.83
901	LPC(24:0/0:0)	230.481	608.459	175.983	208.075	214.621	229.625	201.478	232.432	146.513	473.34	649.798	237.605	558.497	262.816	280.542	740.997	383.508	176.851	179.512	387.761	358.909	354.304	563.427	1946.16	445.488	1907.73	847.104	609.51	1274.28	672.845	643.481	413.505	457.882	422.381	494.733
902	TG(20:0/18:1/22:4)	753.511	982.871	1223.08	1269.61	1230.26	1187.57	897.299	1422.97	548.671	1861.4	1894.93	775.244	1214.79	950.543	1345.07	1630.01	1870.2	876.685	997.317	1675.26	2000.75	1681.15	2615.01	2581.73	1083.61	2935.04	1224.25	1243.12	1987.34	1601.12	1747.85	1559.6	1827.06	1538.71	1606.31
903	TG(20:1/18:1/22:6)	758.583	976.831	941.851	981.883	1081.94	922.668	801.564	808.301	481.716	671.56	799.925	361.836	605.765	459.44	582.293	614.232	1053.23	378.772	447.453	859.756	1246.83	833.664	1410.97	1590.86	646.309	1833.92	792.268	553.652	954.434	809.251	591.966	684.382	749.344	919.568	763.702
904	PC(O-16:2/20:3)	375.89	766.568	179313	167632	191202	171176	140195	144605	110404	293190	293571	165438	219482	148521	206915	199150	240144	98557.8	108071	204793	250254	179716	293993	252954	102013	233293	100381	98054.5	157796	115076	195502	179231	184605	188562	204608
905	DG(18:4/22:2/0:0)	482.396	686.566	3921.44	4024.18	3394.06	3103.36	3166.05	3150.68	2316.32	4078.41	4142.25	1760.07	2932.44	1669.24	2333.5	2557.25	6468.78	3114.72	3433.88	4911.61	5470.04	5208.1	7776.32	9853.02	4900.83	8671.45	5095.86	4157.62	7239.63	4865.11	4555.37	4836.77	4874.55	5027.22	4862.44
906	PC(22:5/18:4)	294.901	850.53	713.122	384.912	426.096	334.735	347.494	338.087	238.875	974.87	1373.29	648.162	999.688	546.043	824.613	937.378	1549.1	354.177	578.106	981.004	718.953	763.978	1466.25	1532.43	670.166	1082.92	838.245	815.444	888.272	632.792	799.4	941.122	842.621	894.419	870.16
907	TG(18:0/17:1/20:4)	742.57	912.817	6815.35	6004.12	6550.95	5815.4	5002.06	3751.57	2961.68	14620.8	15712.1	12584.9	10973.1	7169.73	14898.4	10289.6	13665.2	6106.11	6813.27	12092.1	12684.1	12439.6	19137.9	14984.3	6628.61	18554.9	8737.42	7725.83	11444.2	8841.2	9672.95	8989.15	11681	8823.66	9707.04
908	Cer(d18:0/21:0)	554.244	610.608	497.245	467.883	439.118	453.197	485.555	458.012	302.894	2354.69	1601.23	968.172	1198.56	777.28	1058.14	1199.17	2032.46	730.627	1009.31	1835.41	3328.9	1596.9	2720.02	5628.77	2345.35	4756.64	2665.72	2871.27	3522.51	2691.83	2408.99	1897.24	1694.88	2738.86	1763.05
909	TG(19:0/18:1/20:3)	802.005	942.838	590.064	413.99	640.624	626.001	499.932	552.15	388.86	1011.91	1332.5	666.745	829.79	695.436	760.374	847.96	1629.22	735.725	791.132	1624.57	1881.85	2036.89	3782.53	2926.09	1347.48	3605.83	2101.5	1475.45	2760.59	2082.21	1410.3	1277.78	1519.32	1151.32	1344.53
910	LacCer(d14:1/22:0)	406.276	890.65	2781.37	2224.81	2732.58	2303.16	2000.79	1803.83	1251.86	4350.32	4710.67	1828.64	2531.44	1952.54	1676.58	3141.59	2619.02	1340.22	1552.22	2639.27	3038.88	2416.6	3819.54	3871.74	1593.77	3187.99	1811.58	1928.71	2549.45	1755.65	3244.1	2997.6	3147.84	2967.75	3241.23
911	MG(33:0/0:0/0:0)	565.118	569.546	3749.05	3317.18	2537.12	2667.51	2452.39	2620.38	1454.61	5569.22	6544.35	2679.59	4408.97	2852.64	4428.69	4289.11	9338.38	4339.6	4351.38	9160.15	10712.5	4445.36	12697.9	9868.25	4413.12	8275.72	4661.27	4648.49	5322.08	4342.08	5754.5	5545.56	5817.27	5605.05	6096.58
912	LPC(29:0/0:0)	417.608	678.527	711.951	747.103	888.307	1659.88	806.577	1003.57	908.664	1441.98	4422.49	2045.83	2608.72	2002.69	2498.3	2211.93	9196.29	4236.85	4666.97	10581.4	9484.82	7132.06	11825.8	8442.93	2842.28	7541.82	3696.15	2368.3	4811.78	3258.67	4518.89	3499.72	4225.31	4121.96	4232.2
913	PC(20:4/22:6)	317.905	854.564	4484.64	4406.19	3689.27	3691.71	3751.48	3410.8	2547.6	10955.5	10575.9	4951.13	8207.01	4742.95	8113.94	8447.59	18557.1	5903.22	8298.82	13094	15131.7	12750.9	19528.5	19451.2	8994.29	15382.6	9640.19	9355.99	12234.3	8641.73	10200.1	8979.08	10151.8	9973.48	9545.08
914	PC(O-20:2/19:0)	625.606	814.684	808.303	728.86	742.525	764.156	687.679	649.559	448.519	1663.34	1648.49	976.085	1146.54	832.01	1105.29	1193.51	1260.14	586.751	612.113	1288.66	1171.14	1088.06	1739.53	3132.82	1628.16	4931.26	2066.89	1467.34	3895.29	2147.56	1449.83	1684.9	1529.73	1469.87	1526.53
915	LacCer(d18:2/16:0)	308.392	860.603	1358.69	1104.42	1213.46	1232.83	994.623	882.584	648.455	1696.31	1905.19	773.372	1221.85	743.154	970.984	1379.18	1340.12	551.778	654.111	1725	1447.89	1180.06	1868.52	2805.93	1102.6	2600.58	1317.07	1009.69	1664.4	1069.66	1445.68	1431.85	1370.71	1356.69	1432.35
916	PC(P-20:0/24:4)	547.828	878.691	2268.55	2367.03	2481.92	1685.23	1938.58	2404.49	1141.31	4878.14	6014.13	2142.58	3340.7	2479.3	2949.33	3402.45	4641.49	1742.64	2813.08	3405.51	4237.98	3900.63	4608.31	6048.16	2108.44	5763.08	2420.74	3045.65	4452.46	3148.8	3797.12	3477.64	3723.88	2824.66	3809.31
917	Sph(d16:1)	95.271	272.257	1472.34	1572.88	1839.99	1833.85	1593.94	1917.38	890.313	1773.61	2194.81	1082.09	1278.19	993.443	1308.74	1438.35	3259.94	855.538	886.181	1969.65	2622.9	1869.46	4130.55	1040.38	1589.37	4195.44	1657.44	318.322	474.899	1612.65	2041.75	1890.4	2162.33	2429.17	2075.38
918	Sph(d16:0)	61.107	274.274	84330	83759.1	119217	108180	86684.9	110104	53125.9	111327	165067	65110	76984.3	63187.3	78554.6	88362	213359	52307.6	61625.4	120823	151971	192488	268982	370825	90215.2	234996	98092.2	83914.1	138446	115370	127821	132542	135547	129001	121333
919	GlcCer(d18:0/14:0)	347.58	674.551	350.873	294.849	371.776	369.8	321.778	292.084	235.235	1159.51	1192.39	495.304	866.665	522.053	656.545	764.172	600.171	278.79	385.57	638.729	539.782	755.269	877.455	2308.82	1007.81	1631.76	1022.97	1079.46	1376.23	1008.88	1041.78	995.708	891.03	815.509	833.212
920	PI(17:2/22:0)	505.767	922.642	2297.23	1687.01	2073.87	1835.84	1583.88	1819.42	1086.55	1795.34	1875.15	893.684	1294.05	1110.13	1030.75	1260.22	1751.3	659.921	759.139	1419.03	1455.62	1315.29	1898.95	3647.25	1503.27	2685.8	1398.08	1373.45	1834.69	1274.24	1678.27	1866.12	1576.32	1894.46	1924.8
921	Sph(d18:1)	112.953	300.288	1273.87	697.797	674.381	2050.73	2068.35	952.74	961.136	2970.5	5494.62	2221.71	2209.74	1271.84	2272.02	2765.65	4299.5	2884.27	1680.54	3269.71	3900.13	3088.43	9653.59	9.4899e+06	3.43987e+06	6.65438e+06	3.55081e+06	3.26351e+06	4.97535e+06	3.45706e+06	1.41717e+06	1.33224e+06	1.36706e+06	1.44095e+06	1.41836e+06
922	TG(18:4/15:1/20:0)	741.206	884.772	102870	90364.5	100923	91769.4	77166.1	66434.1	50785.5	290522	527713	266967	201382	157042	204131	350812	312262	147085	148049	295229	504954	282542	500178	677182	240991	638396	288881	220803	393214	293969	357782	230002	343732	251120	231995
923	Cer(d18:1/14:0)	385.413	510.484	3155.99	2461.78	1617.19	2080.8	1468.59	2021.5	1099.83	12708.7	13100.1	5765.32	8199.1	5996.66	6143.06	7930.17	12485.2	5237.62	5354.39	9934.73	13354.3	10179.1	14483.5	26801.1	14839.3	23040.3	12995.7	12305.2	17629.3	13299.5	9782.84	9707.53	9141.82	9407.89	9559.67
924	Sph(d22:0)	120.24	358.365	524.305	381.242	412.144	395.157	366.706	430.352	374.368	768.24	592.391	295.279	409.254	270.765	319.059	323.201	665.448	264.047	301.48	511.866	605.693	559.519	1252.32	1695.19	500.835	829.315	277.927	371.323	481.805	445.709	529.936	533.076	584.409	506.054	610.929
925	PC(20:4/22:4)	381.483	858.59	21490.1	22848.5	23818.2	17274.6	20890.9	15169.2	8623.55	38438.1	30016.2	23243.1	22108.4	17444.6	24832.4	21867.9	39309.7	23762.2	23416.9	44993.6	38495.6	41561.2	54784.7	84447.1	24773	64626.8	35614.4	27979.5	40514.1	36006.4	32710.2	42463.1	28110.4	29536.8	37516.8
926	TG(12:0/14:0/14:1)	602.119	710.626	542.441	615.578	422.173	598.719	516.557	580.022	284.573	43218.6	44838.1	18992.5	31016.7	21136.3	15417.2	31718.1	12340.2	6491.73	8122.98	13207.7	11718.5	11800.5	15675.6	148584	71169.4	386981	134362	56516.3	117738	113775	46335.2	47132.1	46847.1	48112.4	46494.6
927	LPC(31:0/0:0)	461.62	706.56	3621.49	4171.74	4832.77	4917.61	3979.24	4331.05	2460.54	10441.8	7910.23	5028.72	6341.93	5105.42	5826.62	7200.92	38276.2	14111.7	15334.4	28949.1	31278.6	26725.9	40993.5	20411.8	10405.2	20980	11435.9	9911.38	17286.5	11202	11842.9	10862.9	12522.3	12319.7	12142.9
928	LacCer(d15:0/27:0)	504.421	976.742	796.892	494.893	765.368	329.809	551.94	488.464	354.811	669.821	608.754	310.48	426.103	355.159	306.382	483.3	666.939	287.423	327.897	614.059	692.2	818.346	803.658	1354.21	497.778	1035.32	531.851	560.995	735.181	482.315	657.32	764.308	564.314	664.523	570.734
929	TG(18:4/17:1/20:0)	770.211	912.802	19064.2	15907.8	17654.3	16735.7	14340.3	13165.5	9592.79	58664.3	63848.1	31783.2	42791.4	29428.1	39113.2	44861.2	63407.4	30921.5	34473.6	60467.5	65400.3	58900.8	123028	110311	47399.9	144596	72160.1	51530.9	91807.9	71632.8	56617.3	53495.7	54590.5	53111.5	55847.4
930	TG(12:0/15:0/14:0)	637.534	726.656	764.919	715.875	696.045	812.719	631.517	724.793	475.767	2851.99	2746.38	1258.31	2082.62	1408.07	1281.79	1938.07	1906.11	1283.35	859.371	1830.81	2168.14	1708.41	2625.72	12889.5	5289.47	18028.5	8095.59	4589.93	7732.02	7446.59	4110.85	3772.14	3918.14	3872.1	4229.75
931	TG(20:3/18:1/21:0)	840.758	970.869	481.607	426.651	511.551	494.01	393.033	383.198	290.213	678.179	716.784	421.548	512.052	380.37	502.132	635.199	1098.91	512.285	611.066	1033.42	1167.26	981.946	1268.17	3377.51	916.701	2709.37	1381.36	935.358	2273.52	1453.36	1020.24	1027.68	935.901	942.95	1007.01
932	TG(12:0/16:1/14:1)	604.129	736.64	368.408	385.226	399.575	455.812	359.647	442.667	212.384	19873.1	22614.9	8953.99	14643	10895.4	8576.1	15263	7659.61	3606.11	4530.07	7416.45	7129.66	6221.68	9761.7	46149.7	22334.5	115929	41936.2	19369.1	41020.4	37424.8	17789.2	18085.1	18099.1	18374.5	17639.9
933	PC(18:2/23:0)	642.885	856.66	611.921	534.69	575.597	618.577	500.471	607.095	323.082	567.467	565.77	604.878	457.939	325.526	703.692	353.71	710.015	312.432	307.881	623.646	662.414	547.632	820.402	1625.29	622.03	2118.05	723.929	617.978	838.68	646.95	449.182	439.013	442.702	615.182	449.057
934	TG(12:0/16:0/14:0)	650.919	740.672	3208.64	2082.76	2384.86	2989.18	3132.98	1975.18	1641.9	53597.4	52261.5	24643.3	37295.4	27711.8	20686.7	41816.1	37847.4	18386.1	22155.2	34643.1	30133.4	32557.9	41199.6	379484	180780	487086	247445	130988	240684	233577	120380	109789	108316	107820	109653
935	TG(12:0/16:0/14:1)	628.18	738.657	1096.42	975.176	1144.29	1309.12	975.586	986.371	632.765	94670.5	93375.4	42324.7	63146.9	51910.9	34810	64990.1	34855.4	17553.1	20773.2	33473.5	29318.2	28643	40715.5	402085	193072	917173	330870	141931	323164	319374	126483	127626	124500	123568	128359
936	TG(16:0/15:0/22:5)	681.338	884.763	1145.64	1047.34	1177.31	1085.94	875.789	859.738	597.998	5487.74	4986.68	2767.29	3541.89	2695.24	2706.84	3842.82	3625.51	1763.63	1841.35	3605.33	3251.77	3103.28	4899.42	4885.14	2964.14	6175.57	2438.59	2614.27	4440.77	3654.84	3150.89	3127.09	2910.9	3338.79	3364.72
937	TG(14:0/17:1/14:1)	642.554	778.686	1391.06	1440.31	1579.49	1733.72	1378.9	1532.79	815.454	2484.08	3824.41	1253.6	1937.15	1339.88	1565.06	1699.03	2399.74	1295.27	1143.21	2186.58	2651.07	2061.12	3796.75	4521.29	1906.86	6848.13	2822.07	1826.51	3574.35	3195.86	1893.91	1935.74	2126.57	2035.9	2044.21
938	PI(14:0/18:2)	240.835	824.521	305.22	365.977	348.509	345.728	318.973	344.984	245.004	430.645	538.341	224.761	286.39	254.846	335.783	376.063	360.092	153.699	214.68	442.761	291.204	323.753	501.291	836.589	416.316	695.433	376.49	330.764	552.76	333.326	390.679	543.08	387.813	360.954	360.67
939	PC(18:2/26:2)	524.827	894.687	2933.39	2866.62	2809.69	2919.1	2520.58	2548.93	1706.14	1019.33	2506.69	685.779	1350.71	1002.05	1304.89	566.817	2703.89	691.998	1288.83	2576.65	2729.06	1270.86	2120.9	3934.32	1670.67	4048.58	2016.21	1724.11	2540.96	1806.75	2496.66	2462.93	3222.12	3339.91	2388.45
940	PC(O-20:2/20:4)	445.752	820.615	77103.3	51087.7	51452.8	47219	37475.7	53467.4	27047.3	82150.8	64957.3	40146.2	58108.5	36957.2	55428.1	55280.2	42988.3	19086.6	21587.4	51130.7	58652	33946.4	50124.5	60714.2	25749.9	59644.7	30230.1	64895.7	63171.8	68838.1	48123.8	67405.8	51036.5	68034	51776.9
941	TG(17:0/22:6/18:1)	743.647	936.802	36386.9	36524	36396.9	29876	27319.7	22600.6	15139.3	32454.5	39200.4	17506.9	23589.1	18098.6	23443.8	20323.1	20992.8	13323.9	12920.7	27007.2	28634.2	23876.2	44296.1	31286.4	14321.6	48231.4	20405.6	12903.4	24273	19814.7	23732.6	22860.2	22396.1	24020.8	24419.2
942	TG(17:0/22:6/18:2)	724.637	934.785	9243.25	9622.67	9672	10224.2	7918.85	7115.31	6972.36	13676.5	14656.9	8661.39	10067.1	9436.15	15127.8	11015.8	17919.9	10785.7	6454.59	13309.2	15801.5	12759.7	40683.1	24812	9156.66	26304.4	9771.9	9429.58	16653.9	12250.1	12718.8	13900.6	12943.4	14648.6	11977.8
943	TG(13:0/22:6/22:1)	693.058	936.793	931.241	839.677	859.186	834.867	685.475	670.503	449.616	2442.4	2075.91	2008.19	2212.42	1545.31	1698.54	2295.53	2501.59	1093.48	1324.66	2328.04	2567.14	2337.04	3141.83	3983.71	2177.96	5428.77	2096.88	1156.34	4017.64	2553.68	2247.08	2131.36	2064.76	1611.24	2311.72
944	Cer(d18:0/17:0)	476.58	554.545	333.869	298.172	318.066	455.591	389.08	308.609	228.861	3283.16	4489.65	2137.58	2696.17	1987.08	2367.42	2920.23	3320.25	1523.88	1741.12	2784.26	4342.99	3454.58	4568.29	13389.6	6049.47	10491.4	6118.72	5593.49	8926.48	5286.1	4481.6	4773.98	4415.3	5336.04	4355.93
945	TG(15:0/20:4/16:0)	716.201	858.745	9734.59	9143.94	10301.8	9871.46	7765.82	8557.99	4948.33	34049.7	42141	18687.3	25071	17292.2	24133.3	23634.3	40237.4	16818.1	17171.8	36271.5	44351.8	31224	55975.2	74462.2	32668.5	73773.2	35452.5	30648.8	48563.1	36301.9	28819	29354.1	26952.4	27556.3	29766.8
946	TG(20:2/16:1/21:0)	843.387	944.854	253.141	272.977	304.723	330.773	259.238	283.786	199.121	530.804	510.714	301.083	325.125	254.092	382.738	412.618	514.763	298.801	359.907	770.682	656.085	613.043	876.928	1412.4	560.646	1599.05	1033.55	784.328	996.351	934.913	662.693	725.535	612.811	622.306	651.61
947	TG(16:0/22:6/17:0)	717.789	910.776	4528.61	3406.61	4676.55	6001.39	3046.11	8187.88	2313.49	6038.14	8476.92	3278.16	4827.69	3108.65	5089.6	5574.77	3749.9	3208.61	3511.44	5606.14	6223.76	5949.94	5824.17	5412.13	3577.28	6453.8	4675.59	2743.74	5896.48	5661.92	5346.07	4156.58	5217.14	4655.32	5177.9
948	TG(12:0/17:1/14:1)	617.662	750.654	2458.79	3644.37	3591.56	4327.95	1777.16	435.522	2200.7	1690.77	2045.8	799.936	1181.23	979.58	908.842	1253.34	1020.7	544.083	620.497	1108.33	7570.52	5276.75	1726.59	3596.96	1715.7	7007.61	2643.12	1449.75	2661.11	2644.36	1477.27	1432.11	2413.9	1567.93	1390.69
949	GlcCer(d18:0/18:0)	448.351	730.613	869.878	372.368	3414.63	3067.39	646.163	413.694	481.696	7611.76	9991.97	4654.08	6632.72	4727.06	5880.87	7006.04	4945.56	2326.21	2742.03	4440.75	5419.87	4714.51	6979.38	11168.4	4651.36	8840.03	5788.07	5457.41	8233.28	5307.92	6482.85	6130.5	5587.92	6203.28	6879.55
950	TG(12:0/14:0/12:0)	599.636	684.609	960.656	942.963	987.588	1022.38	900.999	919.071	631.796	5098.1	4934.21	2311.29	3379.27	2752.56	2103.59	3773.23	3006.31	1659.43	1764.9	3022.65	3180.43	2849.33	4273.71	37620.7	15585.8	57892.2	24829.4	12174.1	20999.3	24353	10143.9	9843.72	9907.16	9850.5	9694.16
951	PG(18:2/20:1)	363.486	823.564	5974.92	5726.65	4999.33	5819.53	4511.48	4657.19	3275.08	6252.99	6208.74	2838.84	6270.13	3924.72	4917.76	4444.46	5809.99	2258.02	3043.15	7058.05	5676.31	4128.29	9514.64	13800.7	5317.55	11570.1	6486.56	6034.37	7437.89	4516.51	5843.11	5717.04	6128.87	5926.91	5760.8
952	GlcCer(d18:0/16:0)	400.861	702.583	2877.33	2711.49	2709.57	4943.9	3268.41	2357.37	1934.89	35787.6	45285.9	20194.3	28742.8	17933.8	26751.2	27313.7	30947.8	13633.5	15489.1	27189.6	48292.7	28298.8	54270.4	124399	46967.3	84737.3	49092	58485	77205.4	55739.4	39934	37600.4	38260.4	38427.5	39689.7
953	TG(15:0/22:6/17:2)	689.532	892.739	1589.28	1566.71	1897.34	1893.6	2004.27	1672.04	831.126	3178.18	3505.09	1536.6	1806.57	1845.62	2277.39	1713.08	4897.68	1983.46	2474.55	2642.13	4185.3	2339.87	3536.16	3290.31	1355.27	3148.77	1347.72	1465.25	2408.29	1975.55	1364.1	2073.2	1864.9	3760.27	1976.79
954	GlcCer(d18:0/24:0)	549.094	814.694	6527.08	5162.56	5188.59	4023.98	4455.05	33071.5	2826.26	10154.1	11131.4	11545.3	7689.8	5247.4	7956	8184	11775.8	6141.99	6253.59	11932.7	14326.2	11234.7	16421	14215.4	5673.02	11838.9	6477.31	15957.9	9204.51	6884.17	8961.64	8825.9	8288.89	9397.8	9346.27
955	PC(15:0/16:1)	290.161	718.551	2341.79	1968.16	2081.62	2010.28	1765.98	1809.53	1252.02	3510.99	3704.21	1376.55	2634.03	1610.79	2320.38	2635.57	2285.64	846.05	1045.75	2124.99	1630.9	1587.07	2186.62	5526.45	2583.44	4591.53	2692.67	2597.6	3677.07	2567.61	2963.68	2685.3	2844.82	2572.58	2805.78
956	PC(22:0/20:2)	670.579	892.68	1622.03	2218.6	2385.46	2913.92	1366.35	2076.05	1277.65	9094	9825.39	5197.13	7272.18	5503.57	5548.36	7769.96	13114	4731.56	5286.01	11582.2	12078.4	9999.55	17409.1	16489.6	7732.43	19019.7	7571.22	7185.02	11152.1	8992.9	8486.79	7643.82	7514.09	7520.05	7499.8
957	LPC(35:0/0:0)	513.776	762.63	16627.4	14215	12515	11771.2	13054.8	10138.9	7805.94	12347.9	11138.1	5311.39	8931.25	5057.44	8251.01	8690.01	12688.8	3750.46	4916.47	9149.27	9288.75	8588.69	8918.63	15658.9	9241.41	13729	7563.91	8450.43	10229	9015.89	13743.6	12491	13542.3	13475.9	14291.7
958	PC(22:6/20:4)	317.933	876.545	1216.15	1178.86	986.581	1077.99	1111.81	948.834	731.889	2284.69	2444.72	1107.42	1877.63	872.873	1814.38	1809.01	2851.43	932.104	1230.29	1847.14	2226.12	2001.29	2552.38	4603.05	1712.45	4124.47	2481.98	1751.12	2446.97	1650.2	2099.2	1978.31	1890.46	2147.09	2045.4
959	DG(32:0/8:0/0:0)	637.677	698.66	797.069	817.897	884.287	767.895	777.367	613.491	651.469	979.266	1102.38	609.805	1004.04	762.703	1063.07	1136.51	2288.39	1097.76	1282.15	2055.86	2024.61	1991.48	2724.28	5207.99	1740.63	5587.11	2857.34	1628.32	2900.21	2283.77	2143.24	1818.37	1847.53	1911.55	1855.01
960	DG(2:0/29:0/0:0)	493.22	572.522	3377.69	3380.63	3041.15	3221.02	3388.84	1229.15	2152.24	8838.55	10303.5	4559.27	6657.88	4642.18	7475.63	7107.44	14638.9	6342.02	7729.02	13242	16611.1	14067.8	17570.4	20003.1	7846.66	14031.2	7929.87	8240.21	10354.1	7986.85	8735.29	8834.75	9141.69	8847.51	9215.42
961	TG(12:0/12:0/21:0)	601.644	782.707	187.895	185.396	209.837	283.982	204.154	246.757	166.063	583.312	648.852	272.789	426.72	301.308	344.547	421.437	572.085	202.622	213.883	494.416	466.023	453.426	658.127	1759.4	807.253	2540.36	1411.97	784.527	1554.51	1041.18	798.87	701.023	672.037	809.869	842.199
962	CerP(d14:2/25:0)	435.622	686.565	962.382	1177.29	1153.1	1063.86	943.849	1152.08	873.501	1672.72	1202.88	494.462	836.699	527.719	852.404	774.107	1781.31	592.493	646.714	1621.65	1927.27	1396.62	2185.34	14901	5206.6	7924.44	5438.83	4344.37	7115.8	5031.03	2343.66	2788.36	2120.73	2025.52	2197.3
963	LPC(36:0/0:0)	544.837	776.647	19503	14498.2	15442.6	13087.5	13947.4	10295.7	7554.17	12640.4	17097.5	7878.55	9829.2	7110.13	8833.53	10218.9	14485.4	8032.74	6981.63	12433.6	17964.8	14626.9	17468.6	27945.6	9113.65	20350.5	10760.2	11640.4	14639.2	11887.7	16464.2	16092	16067.3	16309.2	16434.8
964	TG(18:1/20:4/18:1)	656.254	924.793	470.777	501.129	613.452	505.072	402.245	469.592	307.414	1003.33	1384.36	535.035	787.308	510.17	677.05	767.134	1028.18	391.501	457.07	881.867	853.332	675.86	1295.75	9122.64	5391.63	8675.17	4739.68	5290.66	7504.33	6097.2	2440	2452.46	2578.84	2499.6	2503.78
965	PC(18:0/17:0)	409.884	776.621	19682.3	14049.8	4765.43	5459.05	3471.86	5421.27	8881.13	7437.79	7398.87	3365.1	6484.3	10095.2	5042.03	5106.38	7137.27	2686.6	3241.17	6645.46	7511.27	5498.02	9434.48	11919.3	5528.29	14754.7	4574.39	12827.7	7553.66	5156.62	10506.3	4554.18	9155.44	12575.3	5221.83
966	TG(12:0/16:0/12:0)	626.691	712.641	1385.99	966.425	1324.96	1896.67	1519.11	1024.88	839.659	45392.7	42684.7	21488.6	30213	25378.1	16133.6	33163	22052.9	11943	13119.4	20121.1	19032.7	19632.4	24683.9	592044	272140	797279	363114	202454	355295	379309	154012	148700	151862	153133	149828
967	DG(20:4/24:4/0:0)	558.032	738.591	2103.59	2441.27	2006.95	2057.12	1616.34	1824.51	1120.49	5040.55	4981.63	2396.93	3395.51	2238.09	2969.45	3062.96	6205.48	2537.6	2869	6034.08	6555.47	4151.09	8375.28	8302.05	3784.6	7590.56	3569.94	3161.77	4705.11	4011.15	3934.14	3856.31	3537.52	3620.1	3766.71
968	LPC(39:0/0:0)	548.113	818.704	9348.41	7468.14	7527.29	6569.54	8143.19	6123.76	4648.57	7934.5	9748.53	3924.58	5936.89	4015.71	4798.89	6163.86	7192.33	3422.66	3780.45	6106.42	7608.74	6065.42	8524.39	14030.4	6059.49	10465	5566.43	6778.19	8389.21	6704.72	8494.62	8953.75	8751.18	8749.12	8839.88
969	TG(20:3/18:1/22:4)	696.356	976.826	1179.44	922.527	1115.57	983.705	794.618	672.624	520.381	2878.09	2290.83	1908.29	1861.11	2565.49	1496.76	1597.49	2191.41	1993.19	1132	2536.05	4111.26	3925.01	3306.2	2479.5	859.188	4988.54	2806.32	2536	1886.62	3635.75	2565.29	2157.86	2205.01	2172.91	1717.64
970	TG(12:0/20:4/14:0)	681.538	788.676	2049.73	2313.87	2320.99	2520.39	2028.2	2072.77	1566.74	4455.47	5463.39	2610.15	3200.13	2430.98	2812.17	3027.45	4888.89	2154.15	2541.11	5200.2	4677.99	4251.2	6736.75	10204	4000.08	10349.2	5653.2	4918.53	6857.57	5078	4517.63	4253.97	4178.07	4092.91	4317.44
971	SM(d14:1/26:0)	599.778	787.659	2589.19	2701.26	3048.89	3353.45	2438.31	3225.23	1659.03	1484.03	3580.89	851.003	1098.67	2046.33	2683.05	2239.89	5246.86	2218.67	2066.25	1053.13	5173.25	4270.59	7462.83	2780.42	3247.71	4547.72	1691.16	3030.11	4814.38	1907.97	1290.39	3049.71	1236.08	1208.72	1208.42
972	PS(26:2/16:0)	406.293	872.637	1406.79	1011.85	1122.69	1134.58	996.814	956.572	631.065	1913.7	2328.93	976.54	1401.8	816.986	662.132	1372.7	1612.09	643.205	820.151	1541.79	1165.66	973.958	2397.84	1745.65	915.319	1939.3	873.168	818.201	1377.65	1051.82	1514.43	1161.85	1256.5	1317.37	1536.64
973	PC(20:5/22:5)	471.473	854.585	4740.83	5559.39	5716.62	6210.37	5085.19	5776.04	3671.43	5607.2	5959.91	3488.62	3857.03	3951.26	4011.81	4086.73	8228.19	3523.93	4053.46	8529.28	8187.95	7237.43	10968.2	11571.9	5094.78	11088.4	5078.92	4827.27	7641.8	5040.85	7826.24	5832.79	5915.5	5345.95	5086.03
974	PC(P-22:0/18:4)	485.545	822.646	29475.8	23785.5	22382.7	20246	21990.9	15476.6	13008.4	21326.4	26070.9	9881.94	15944.6	10768.2	12355	15394.2	14214.7	5828.23	6587.44	12168.6	7120.8	10296	15723.8	29907.5	11686.6	21298	12019.8	11600.5	18658.4	12632.5	18146.1	18454.5	19597	20063.7	20130.1
975	PE(22:0/20:3)	644.84	826.636	2138.93	2402.88	2766.78	3383.95	2322.2	3521.2	1935.56	3465.67	4217.46	1887.97	2268.51	1886.34	2636.64	2249.42	5040.97	10746.8	2226.12	4966.37	5609.44	4402.15	7722.79	7284.36	3082.38	7088.98	2853.56	2581.79	4052.44	3194.08	3236.97	2806.28	2772.36	2568.42	2566.9
976	PG(20:3/20:4)	274.815	838.553	8568.25	8370.34	8399.61	8632.07	8235.96	6616.08	4905.54	5937.95	6519.16	3110.72	4575.12	3025.64	4685.47	4784.15	7161.75	2681.49	3139.16	5945.96	6946.47	5033.07	7614.93	6458.43	2973.16	6010.9	3322.01	2953.54	4274.83	2952.89	5781.92	6469.78	5844.39	6126.92	5956.25
977	PC(P-16:0/15:0)	311.605	704.562	3772.25	3415.58	3127.84	3458.12	2922.16	3000.23	1951.68	3049.11	3506.17	1342.46	2334.68	1472.63	2176.15	2497.76	2003.1	686.956	870.375	1814.65	1432.52	1447.04	2152.83	4718.89	2172.62	4251.76	2064.7	2024.21	3201.18	2201.32	3137.29	3122.77	3131.25	2972.22	3017.32
978	TG(17:0/22:5/18:1)	682.537	938.796	475.236	426.152	472.392	457.199	356.944	312.321	234.806	1982.59	1985.41	2485.1	1441.38	1036.64	1235.93	1507.07	1788.89	841.202	915.029	1892.72	1791.61	1666.44	2803.05	3403.27	1635.88	3954.19	1663.91	1680.1	2410.21	2162.77	1582.15	1603.17	1626.28	1430.45	1621.98
979	TG(16:0/22:6/22:6)	652.096	968.767	525.748	597.119	631.508	850.837	796.387	731.357	383.701	1677.74	1585.54	800.211	1114.56	2819.42	1073.51	1181.47	1726.83	769.474	848.478	1577.21	1950.15	1366.62	2465.49	2525.76	891.377	2571.68	988.218	995.207	1523.14	1492.68	1222.29	1143.75	2683.5	1798.47	1316.29
980	LacCer(d18:0/24:0)	528.128	976.751	2020.87	1667.29	1827.26	1839.95	1721.01	1561.13	1173.88	1796.08	2023.34	936.418	1291.88	839.563	946.817	1368.93	1813.45	753.508	921.695	1617.58	2956.73	1568.26	2645.87	2273.08	1143.64	2310.77	1338.4	1261.27	1590.37	1493.37	2056.13	1860.14	1950.35	1771.78	1822.53
981	TG(12:0/14:0/22:1)	628.201	822.747	289.459	301.719	334.186	388.248	270.32	322.448	184.046	1295.43	1483.48	740.248	988.746	736.928	725.244	969.154	1012.11	465.365	521.016	1042.18	1005.91	777.004	1370.64	5294.62	2195.66	8424.97	3388.44	1734.43	3645.74	3437.84	1634.87	1555.95	1480.16	1404.43	1509.45
982	TG(12:0/14:0/20:0)	626.847	796.73	294.798	252.738	294.619	280.952	217.353	267.06	175.3	1143.27	1331.64	528.361	759.474	613.057	676.523	700.808	1008.77	423.686	507.579	833.441	1134.43	865.382	1304.61	6018.68	2679.93	7196.13	3384.59	2051.97	4273.76	4536.59	1801.36	1769.16	1618.87	1641.93	1939
983	PC(O-16:2/20:5)	288.853	762.555	690.136	674.041	685.194	672.985	533.321	604.585	345.303	511.419	643.116	247.861	395.849	283.359	434.085	377.742	532.303	258.125	276.349	705.765	627.945	470.996	860.825	2846.43	1167.5	2430.78	1356.47	1560.65	1777.25	1242.69	842.066	763.904	807.393	806.945	818.29
984	PC(2:0/11:0)	153.111	468.279	209.849	214.646	207.124	236.824	227.141	262.128	137.085	305.68	334.178	185.224	223.281	195.066	204.034	215.599	387.665	170.074	162.896	370.222	739.233	308.56	630.402	794.222	279.329	770.26	297.045	248.556	410.641	290.855	296.638	309.337	507.587	301.282	312.238
985	DG(16:0/17:2/0:0)	516.318	596.528	14990.3	14255.6	11054.5	11476	11638.2	11083.7	7560.77	23872.7	25376.6	9829.28	17389.4	10440.4	16302.7	15905.4	37223.4	17155.1	17247.4	33947.2	36205.2	31295.4	44534.5	48827.6	20743	40164.1	22611.4	19403.2	31422.1	19332.7	21759	22276.4	23995.5	22959.4	23866.3
986	TG(19:0/21:0/13:0)	741.02	894.83	3479.65	2277.77	2263.05	4021.86	3436.61	3599.65	2659.08	13580	14508	7522.67	10625.9	6561.22	9843.89	11773.3	21464.6	7285.21	10156.2	19910.2	14745.1	18170.1	23165.6	30769.5	13833.2	29571.9	19150.6	19999.6	23127.7	19298.2	15789.2	15530.1	15143.8	12999.6	13158.2
987	PC(O-20:2/17:0)	600.028	786.654	5099.94	5662.77	6694.62	7621.01	5335.27	6828.09	3550.74	1617.75	1688.13	893.777	1187.31	805.85	830.082	1238.78	1277.06	1070.96	720.14	1299.48	1654.88	1031.71	1514.7	4285.93	1864.36	7599.48	2464.96	1818.32	3080.61	2751.48	1381.34	1533.91	1899.45	1556.93	1467.43
988	TG(18:0/20:4/22:2)	819.952	980.859	1696.55	1469.94	1727.15	1614.04	1321.79	1394.27	974.638	1584.88	1917.05	942.329	2564.02	741.696	1063.79	1059.58	1844.39	690.028	934.865	1884.89	2361.85	1789.45	3310.24	3888.24	1634.44	4312	1992.43	1372.83	2587.48	2275.32	1771.25	1514.77	3708.99	3908.93	1694.21
989	LPC(27:0/0:0)	287.64	650.516	1688.95	1520.11	1525.99	1555.07	1290.18	1357.02	937.81	1439.42	1573.28	753.729	1103.24	728.625	1295.99	1186.5	1573.4	519.159	694.597	1342.05	1116.7	969.849	1390.56	2673.99	984.601	2292.21	1341.74	1123.95	1701.7	1099.54	1551.37	1483.55	1630.13	1411.22	1490.01
9198	IS	407.129	711.562	52623.5	48987.4	55143	61729.7	49070.8	59019	32410.6	62188.8	69659.1	38659	54137.2	39080.5	54648.6	46530.5	83829.4	30892.8	34702.8	75220.7	85913	62442.7	121899	135089	57144.3	145815	65611.4	54715.2	82638.4	62326.7	71352.6	68398.1	71288.1	70881.9	72397.1

## Sheet: peak areas of lipid in neg mode
id	MS2 name	Retention time (s)	mz	Ctrl_1	Ctrl_2	Ctrl_3	Ctrl_4	Ctrl_5	Ctrl_6	Ctrl_7	Pal_1	Pal_2	Pal_3	Pal_4	Pal_5	Pal_6	Pal_7	Pal+Cel_1	Pal+Cel_2	Pal+Cel_3	Pal+Cel_4	Pal+Cel_5	Pal+Cel_6	Pal+Cel_7	Pal+DPA-EA_1	Pal+DPA-EA_2	Pal+DPA-EA_3	Pal+DPA-EA_4	Pal+DPA-EA_5	Pal+DPA-EA_6	Pal+DPA-EA_7	QC01	QC02	QC03	QC04	QC05
1	SM(d14:1/22:1)	371.517	773.578	6805.31	9923.24	14704.1	10841.1	5727.04	9588.77	6102.28	11684.1	16212.4	8889.68	10385.7	9570.83	8649.5	6735.76	9304.83	4802.67	4649.23	11102.3	10809.6	3746.49	19651.4	22756.5	11675.3	22857.2	9743.26	9252.08	19638.6	10272	7636.72	7711.95	12126.2	10513.1	11719.2
2	SM(d14:0/24:1)	464.008	803.625	29006.2	25761.8	26354.8	26925.5	26164.2	24545.7	16161.1	57295	67113.3	29356.3	40264.7	28783.5	29190.3	38612.1	32942.2	14222.9	14080.5	28268.8	27795.4	24790.1	39816.9	77283.8	29242.6	46811	24469.3	28084.8	42558.9	30902	35996.2	36904.8	36776.9	37441.4	32887.3
3	SM(d14:1/20:1)	310.935	745.537	339024	304931	286143	304839	265680	268845	187113	308352	348794	140299	217324	141595	214324	218647	178316	74749.5	88165.5	183562	168787	127754	203774	439730	198807	439616	214422	184282	296747	221202	268758	265984	271668	279083	266243
4	SM(d14:2/21:0)	341.771	759.563	2388.08	1876.44	2005.65	2207.93	1810.72	2521.01	1134.38	2859.62	3685.39	630.675	2145.68	940.352	1707.5	2147.02	1066.66	284.449	441.247	928.527	258.914	595.25	283.015	3144.23	2267.2	3023.09	2266.14	2281.61	2965.58	1561.3	2495.29	2449.36	2204.03	2587.2	2347.9
5	SM(d14:0/22:1)	413.49	775.595	47876.7	45008.8	43507.7	50593	46305.6	41752.9	26756.5	81539.3	91545.3	41222.7	50590.3	38449.3	41168.9	52787.8	51668.1	20223.5	20785.9	46104.4	43481.6	39363.4	67133.3	97260.6	38388.4	69074.7	35158.5	37652.7	54716.3	43206.6	55088.9	54657.4	51800.2	51883.4	47861.2
6	SM(d14:0/18:1)	300.173	719.531	68149.9	64769.2	66831	67447.8	67193.8	62244	41123.7	54944.6	52632.9	23521.4	35945.3	22179.7	32092.9	28668.2	39573.6	15114.8	14588.7	38326.2	28988.8	25711.7	42297.2	116412	39231.2	84397.4	36778.4	31422	65004.7	59149.2	59401.1	59477.2	49709.6	46766	43976.4
7	SM(d14:0/20:0)	359.85	749.569	105563	93850.8	104638	105130	90633.2	94415.8	56829.1	107962	119860	48648.1	66767.6	53034.8	60721.8	69573.1	85727.8	36468.9	36420.9	83278	79960.4	69445.3	100726	179694	73791.5	146515	67579.6	66984.2	98983.7	78976.1	90297.2	91536.6	91227.8	94402.9	95346.7
8	SM(d14:0/22:0)	433.427	777.605	16562.9	16804.3	18755	18305.6	15094.4	15598.6	13763.5	30117.8	23435.1	11294.8	20601.2	14249.5	11006.7	16550.2	20381.1	10305.4	8823.38	14879.6	12417.1	13070.1	31364	35985.9	15677.4	25917.3	12296.2	13851.5	23596.1	19278.4	19461.1	14319.2	18099.2	17665.8	16648.9
9	SM(d14:0/26:0)	582.422	833.675	2186.96	2751.82	2682.84	5672.74	2182.91	2720.15	1634.51	3952.82	4520.66	2010.94	2372.86	2105.71	2529.05	3913.29	24699.8	1984.17	2137.41	9247.47	4597.26	3593.09	6812.45	7739.08	2912.87	6908.14	2647.22	2593.53	6347.21	5121.63	2926.96	3054.76	2577.75	7271.71	7486.4
10	PC(16:0/16:0)	459.755	778.563	27276.6	22109.1	25072.7	23149.4	23255.7	24516.6	15177.1	36760.6	42501	24091	34556.9	23233.2	39589.9	33069.6	63314.6	23833.4	28682.5	66044.9	63340.8	49549.6	78176.3	108246	45395.2	96558.6	49472.1	52838	66909.4	276955	38782.2	38261.4	38545	38947.9	37400
11	PE(18:2/18:2)	367.045	738.508	142861	120919	114347	108854	124331	122665	86690.1	134402	162429	64088.3	99745.8	64888.4	79578.6	98911.8	132964	55202.4	63719.1	120371	158327	105204	173006	195503	77568.9	177768	82155.7	74260.2	134915	94246.7	113353	118496	118413	123868	126502
12	PE(18:0/18:0)	510.744	746.568	4558.66	4161.18	4457.85	4496.15	4160.34	4243.13	2795.09	10316.4	12561	6120.71	9142.74	7125.9	10382.9	11450	23569.8	9158.98	11522.4	18542.8	21816.3	17336.4	29223.7	32210.3	14254.3	42405.9	24482	23231.4	21439.2	20261.8	16343.1	16764.8	17781.2	17128.8	16094.7
13	LPE(18:1/0:0)	64.6385	478.292	1106.22	1313.44	887.193	1284.89	1406.59	1744.2	719.302	4094.53	5196.03	346.734	2270.12	1624.56	2104.08	2217.69	5354.22	2095.79	2537.22	5317.9	7223.44	4051.34	8540.78	7860.39	3467.04	5590.3	3044.8	2771.96	4079.92	3321.61	3885.49	3893	4052.27	4274.01	4443.05
14	PE(16:1/16:1)	367.957	686.475	14470.7	12656	11917.2	11012.7	11251.3	10800.8	8063.2	10762.8	12335.7	5199.02	8233.5	5056.7	6619.01	7871.59	9793.28	4300.79	5324.13	11284.3	13042.9	8848.41	13286.1	24882.8	8616.82	20167.2	9844.27	7945	15838.2	10576.2	11867.6	12176.4	12103.4	12323.8	12944
15	PE(16:0/16:0)	426.453	690.507	72624.2	69760.2	80661.7	74156.7	68081.1	69968.6	42924.5	150403	183161	88461.6	124571	84738.8	146451	146894	338516	137981	173888	299672	381027	283600	469514	586969	236769	565581	332540	325662	338882	299384	226409	232394	218787	229276	224741
16	PG(16:1/16:1)	259.215	717.47	10018.9	9443.17	8754.36	7196.85	7639.16	7990.19	4987.3	18516.9	23574.8	10874.3	15208.9	10170.8	14347.2	15332.7	11499.1	5099.14	5773.99	11197.7	12267.9	9182.4	14160.4	27419.5	12280.3	27955.6	12905	11631.9	16511.1	12167	13919.7	13233.5	13949	14008.7	14650
17	PG(16:0/16:0)	377.079	721.5	284859	309042	327290	336783	266286	473591	286553	394367	371004	214110	273965	202257	288771	242508	332041	130164	137205	269479	395898	282597	460806	647259	264478	560026	254745	221598	404070	292351	294014	269435	286141	266603	261934
18	PE(18:1/18:1)	437.096	742.54	2.49191e+06	2.63377e+06	2.62931e+06	2.67026e+06	2.36993e+06	2.71857e+06	1.66447e+06	2.41834e+06	2.67618e+06	1.27226e+06	1.77312e+06	1.25198e+06	1.74032e+06	1.6906e+06	2.81742e+06	1.16935e+06	1.32797e+06	2.52428e+06	3.10462e+06	2.28025e+06	3.81396e+06	4.97816e+06	1.99092e+06	4.85091e+06	2.38804e+06	1.94441e+06	3.04164e+06	2.29435e+06	2.54727e+06	2.5507e+06	2.58004e+06	2.53858e+06	2.5148e+06
19	PG(18:1/18:1)	360.416	773.533	220684	202954	200969	200914	178843	194813	126840	391985	430998	183630	280487	187934	243395	281251	289825	119265	135721	244286	278611	232513	350940	243488	106986	238442	113935	106220	173771	128758	194950	184837	176184	178569	178738
20	SM(d14:1/26:1)	491.034	829.655	7038.41	7134.48	7627.04	6652.36	6939.13	6846.42	7370.75	21132.6	24790.1	15475.1	15532.2	14039	14130	14719.6	19553.7	7387.32	7892.48	16481.9	15394.7	15566.7	23094.4	49185.7	16691	31204.9	13859.8	14422.2	27716.9	18802.5	20157.9	14207.2	11611.6	19864.2	19715.1
21	SM(d14:0/20:1)	359.823	747.562	1.24761e+06	1.13082e+06	1.24713e+06	1.29027e+06	1.08214e+06	1.22511e+06	755343	1.29587e+06	1.45439e+06	588820	813898	651558	750091	876118	1.00114e+06	397733	439035	941369	982047	734078	1.22573e+06	2.09291e+06	890471	1.77726e+06	783804	846811	1.18544e+06	1.00291e+06	1.02847e+06	1.08755e+06	1.12939e+06	1.13439e+06	1.14221e+06
22	SM(d14:2/27:0)	509.938	843.671	1442.47	1923.05	1245.03	1294.83	1642.2	1980.73	1623.51	5711.35	33996.3	3567.39	20953.3	3129.76	3229.4	4134.36	6043.59	2592.54	2804.26	6441.74	5128.24	4987.28	6133.44	65015.2	6615.19	11107.8	6419.45	6704.55	9152.54	8623.33	5425.66	3395.6	4672.42	5541.46	5394.94
23	SM(d17:2/27:0)	579.444	885.718	1848.92	1622.36	1878.35	1607.11	1547.51	1535.72	991.353	3771.12	4688.27	2032.38	2877.45	1775.07	2763.34	3152.36	5038.04	1962.5	2435.05	4103.96	5779.77	3754.91	6690.74	5382.71	2025.2	4474.68	2635.16	2638.2	3514.62	2743.96	3421.05	3050.23	4944.68	3334.14	3357.52
24	SM(d17:1/27:0)	586.207	887.72	4105.84	3627.7	3969.65	3670.54	3861.74	3752.43	2646.85	4504.1	5517.63	2266.84	3154.13	2124.35	2718.81	3143.42	4805.22	1851.2	2141.78	3586.09	5122.14	2843.82	5140.45	8241.71	4201.68	7930.16	3913.21	3562.06	5067.67	3919.66	4240.74	5401.36	4482.04	4513.31	4339.63
25	SM(d18:0/22:0)	523.808	833.674	96945.6	47590.9	50061.1	48243.5	56682.5	51553.1	36287.2	66682.6	72677.2	34171.2	46674.7	33914.4	38681.8	49443.1	58138.7	24198	27910.2	49122.9	52837.3	46556.6	77029	131767	60259.1	111067	58724.9	62078.5	144779	65127.2	119355	63535.9	67061.6	66535	61596.1
26	PG(14:0/14:0)	241.754	665.438	6846.59	6339.04	6957.42	7520.3	6924.72	7827.71	5790.61	4383.82	4761.3	2600.01	4527.49	2877.38	4120.3	4697.35	5319.71	2337.86	3017.73	6034.09	5871.99	4506.35	9261.6	10051.6	4578.55	9012.67	4890.76	4232.91	7404.4	5271.84	6295.39	6435.72	6267.94	6698.05	6784.74
27	SM(d16:2/26:1)	579.356	855.664	6605.93	6127.17	6138.24	6184.51	5163.24	5422.4	3509.33	2961.22	3107.83	1338.27	1862.16	1289.15	1914.26	2077.88	3162.12	1221.21	1621.97	2762.61	3232.57	5317.73	3653.14	5545.26	2422.32	5702.32	2665.3	2431.78	3174.06	2539.32	3898.29	3674.76	3826.97	4123.14	3577.69
28	PE(P-16:0/22:5)	415.225	748.53	1.38076e+06	1.3806e+06	1.49897e+06	1.46518e+06	1.21344e+06	1.39343e+06	804745	2.33042e+06	2.62883e+06	1.27331e+06	1.69026e+06	1.22761e+06	1.88229e+06	1.77809e+06	1.98824e+06	867684	991788	1.85275e+06	2.2071e+06	1.54839e+06	2.80645e+06	5.46473e+06	1.99326e+06	4.83189e+06	2.36412e+06	2.26981e+06	3.2745e+06	2.35711e+06	1.90188e+06	1.98476e+06	1.96713e+06	1.93097e+06	2.06444e+06
29	LPE(16:1/0:0)	66.486	450.262	1915.67	2138	1730.28	2557.28	1978.25	3100.99	1191.94	9619.03	14891.5	4375.63	6832.84	4417.76	5947.74	6290.85	11796.5	5406	7567.8	20912.4	18405.3	13740.3	23230.6	30131.1	10150.1	18144.4	10625.6	7956.35	17755.2	9761.04	8444.79	7702.66	8118.34	8928.12	9083
30	SM(d14:1/24:1)	418.687	801.609	3892.25	2772.8	4553.27	4090.38	5041.35	4234.57	3117.9	6920.14	11312.6	4915.07	5085.23	3869.54	7187.96	7716.02	8671.14	3743.84	2722.34	9228.43	8468.61	1764.72	10916.8	13763.7	6992.07	6183.24	3409.4	6072.67	8247.12	7321.47	3378.95	4863.36	7001.86	7690.21	5781.06
31	SM(d14:1/23:0)	438.834	789.608	3567.45	3214.89	1096.19	2335.06	2193.21	3069.79	2575.63	3203.58	4302.47	2959.92	2808.82	1768.23	2931.31	3185.11	5448.49	1800.41	889.129	3627.53	3003.64	2593.9	5500.05	6851.1	2913.9	383.388	1608.56	1643.25	3103.69	2335.42	1918.45	3370.26	2550.15	2768.6	1567.77
32	SM(d14:0/26:1)	507.294	831.659	315421	266757	298402	272912	292561	277163	171182	538840	553044	259755	374855	253773	289217	362555	376658	157974	164953	321418	321199	300168	474763	721204	305342	507268	268658	293439	415288	300539	384577	393944	375817	380849	375435
33	SM(d15:2/27:0)	568.694	857.672	3604.35	7209.29	7580.02	7698.4	7059.52	6756.67	4265.83	7727.94	8664.16	4883.46	6884.34	4781.92	5242.5	5268.86	6806.05	3050.68	3214.2	6146.5	6800.99	5603.44	9032.48	14157.1	5214.19	10330.7	6826.92	5216.06	7473.14	6721.58	7190.58	7166.87	7558.62	9129.36	8380.74
34	SM(d15:1/27:0)	591.611	859.687	4787.28	4181.99	5036.92	4562.14	4418.38	61415	2805.11	4862.94	4792.71	41175.2	3188.61	2687.86	4391.85	3334.89	4305.28	1913.66	7337.69	3645.54	4233.74	3386.59	5910.14	8727.86	3589.4	8448.64	3894.61	3080.83	4897.9	3913.11	17269.5	4153.18	3881.43	4682.63	3344.31
35	SM(d14:1/26:0)	582.258	831.672	8006.25	8574.22	9838.82	13938.3	11541.3	10021.2	5480.78	11796.1	13095.8	8684.09	12543.4	6320.57	9711.85	8997.16	16431.4	6920.6	15041.1	15188.3	17993.9	13317.4	25731.2	26427.2	11029.7	24523.4	13216.5	10015.2	13680.1	12427.9	11102.5	17143.1	10807.3	11142.4	10584.3
36	SM(d16:2/27:0)	564.309	871.703	2673.29	2206.63	2559.02	2437.63	1923.89	1882.64	1390.51	4434.58	5274.62	2129.16	2676.9	1617.9	2291.65	3207.75	3955.03	1779.13	1801.96	3354.05	5394.66	3023.91	5650.37	5097.35	2290.64	4787.32	2351.62	2766.73	3044.11	2369.19	3366.29	3166.37	3215.27	3114.49	3328.55
37	SM(d15:0/26:1)	529.271	845.673	171563	75850.8	78465.8	73704.3	160620	72685.9	48390.2	89763.6	113541	45694.1	62859.8	47140.1	51183.4	66173.6	71804.3	30209.4	30718.3	58525.9	59963.5	58024.4	86000.1	160427	66885.3	112735	55878.7	63384.4	92603	71035.5	82701.7	80799.1	82520.5	81154.9	80028.6
38	SM(d15:0/17:0)	300.322	721.538	6428.22	7568.9	7273.93	8104.07	6182.95	7407.02	4270.94	5186.52	4716.81	2383.17	3517.13	2269.94	3084.81	3575.71	4515.49	1758.39	1865.02	4290.69	3764.15	3588.41	5324.05	10636.2	4289.8	9356.82	4272.65	3891.78	5903.97	4677.03	5384.01	5450.82	5802.86	5387.08	5268.77
39	SM(d18:2/26:1)	589.056	883.695	989.421	954.94	908.73	961.429	721.891	1293.39	634.851	739.15	810.681	349.482	594.333	327.681	475.302	433.617	808.126	457.991	418.884	858.472	908.991	820.482	1376.83	2051.9	753.932	2005.24	923.407	785.184	1435.93	1036.64	872.688	926.088	826.614	952.948	895.626
40	LPE(16:0/0:0)	83.025	452.278	6637.9	6868.38	6555.23	7927.68	7217.92	6809.96	4352.38	33635.1	56505.6	16026.6	27449	16099.7	23297.7	25844.8	33485.3	14584.3	18200.9	43831.1	31085.2	28747.8	40719.8	201306	59195.2	124835	71106.2	55329.9	86702.4	59918.4	39641.1	39646.4	40419.8	41794.6	43439.9
41	LPE(18:0/0:0)	113.214	480.31	16809.8	16216.3	17308.3	17370.7	15419.2	16283.4	10903.1	54952.6	69347.8	26683.3	42342.3	29192.9	38876.4	46355.4	54959.7	24112.6	28504.1	62420.5	52762.2	44826.2	69319.1	373195	135555	292839	165695	141079	187265	147056	86531.2	86949.8	85955.6	91871.8	93208.1
42	PE(P-16:0/20:3)	446.633	724.529	348293	185964	247223	195356	206970	213557	117683	268389	289694	142162	213421	175857	211794	204547	252738	98020.2	115890	207355	256100	190477	304060	521741	214408	485277	227244	204610	307769	253600	231512	229477	244943	250337	237710
43	PE(P-18:0/20:4)	458.384	750.544	331238	341990	358291	380704	303730	357371	219243	486868	517748	276749	379054	258178	393336	370451	462014	217881	240503	394112	523961	356377	621497	1.00535e+06	403536	853911	441309	407880	558283	442952	437907	420852	427860	448005	409470
44	PE(O-18:2/22:5)	418.63	774.543	157412	159825	153534	154410	142611	147781	96006.1	172938	192860	91775.2	131942	89478.9	145320	133986	182631	73645	87238.1	147724	180884	138400	227668	380317	150784	355798	183442	159659	235646	179547	170535	164780	168327	176807	187409
45	SM(d14:1/21:0)	387.915	761.579	8306.66	9931.01	10181.1	8357.58	7559.72	8041.7	5308.22	12334.3	14523.2	6733.16	8911.46	6321.1	8196.4	7635.38	9925.57	4621.7	4409.5	9291.26	10143.6	9219.97	13281.5	25516.7	9914.88	17683.1	8370.12	10451.8	14982.1	10738.7	11064	10189	9932.09	11557.4	10740.9
46	SM(d16:1/26:1)	527.547	857.686	90783.8	93788.8	105253	86936.3	91239	79582.6	48372.6	95170.5	122440	52986.5	64580.6	55316.7	61095.4	71568.4	115218	39151	50136.6	95807.2	101610	79765.2	127134	239964	92443.3	213475	98858.1	98107.2	146085	111906	92205.4	96977.8	100018	102550	105435
47	PE(O-18:2/20:4)	429.844	748.528	164136	166652	181480	179463	147842	170004	113621	237696	248445	133579	184649	115546	196687	176049	198410	81675.1	90121.5	181594	216840	155102	268166	1.36074e+06	562253	1.27766e+06	650926	534168	837332	648762	318948	320535	333288	315004	320326
48	PC(18:1/18:1)	429.004	830.591	2.52525e+06	2.5437e+06	2.73249e+06	2.65042e+06	2.31253e+06	2.57295e+06	1.57123e+06	1.42329e+06	1.61824e+06	710039	1.08321e+06	734335	1.12813e+06	1.029e+06	1.66762e+06	648936	786267	1.55121e+06	1.72155e+06	1.34062e+06	2.15263e+06	2.2498e+06	944982	2.08285e+06	1.05937e+06	874871	1.40346e+06	968295	1.78361e+06	1.74987e+06	1.79319e+06	1.74613e+06	1.74438e+06
49	LPE(20:5/0:0)	61.075	498.261	1376.83	1146.03	2178.04	1614.91	1250.81	1750.7	644.329	3819.11	2553.08	1059.02	1648.7	1961.17	2447.91	2152.05	3322.12	1931.36	2320.4	9495.05	6781.69	4875.94	7802.36	12824.3	5302.74	6676.58	3205.69	4031.92	9186.06	4314.83	3939.19	3946.3	3918.33	3864.67	4256.11
50	LPE(20:4/0:0)	47.2305	500.272	278.035	288.728	345.839	353.172	266.051	390.151	216.881	364.947	456.821	213.765	294.792	216.87	261.908	279.125	558.799	308.885	259.323	839.966	763.923	510.085	855.441	4294.76	1028.63	2288.91	880.499	1011.7	1883.42	1147.78	679.564	642.472	586.001	674.529	664.057
51	LPE(20:3/0:0)	76.682	502.293	919.016	1211.04	1340.36	2061.62	1087.83	2129.91	822.589	3741.12	3284.91	1337.81	2520.39	1615.17	1774.55	2188.03	4946.49	2697.53	2863.27	12364.3	7931.24	5976.74	9768.76	15563.3	4607.79	6728.39	3695.78	3657.69	7662.93	4294.78	3684.98	3778.64	3702.3	3611.34	3844.73
52	LPE(20:1/0:0)	115.798	506.325	1934.13	2189.64	2381.47	2881.63	2123.19	3412.86	1673.62	3762.52	4486.09	2213.48	2700.59	1908.13	2486.28	2751.05	5322.45	2443.06	2371.78	8239.64	6160.22	4147.62	6663.3	17320.9	6006.37	10028.8	5867.54	4577.76	8727.65	5485.86	4206.15	5029.77	4019.92	4007.14	4426.36
53	LPE(22:6/0:0)	65.202	524.277	3103.95	3479.41	3924.69	5536.71	2839.75	7586.92	2178.65	7858.51	8749.47	3874.26	6911.87	4007.29	5111.29	6227.77	10150.6	6253.67	6512.11	26020.8	18762.6	13360.5	22039.1	33190.2	14159.3	15998.6	9297.52	7136.22	19728.4	10350.6	10373	8749.85	9003.4	9068.55	9645.41
54	LPE(22:5/0:0)	70.189	526.293	2431.55	2716.48	3239.95	4824.39	2307.53	4736.73	1624.19	5840.45	6099.25	2514.33	4170.58	3146.82	3726.31	4965.13	6954.2	4353.58	4941.72	20159.8	12504	10168.9	15251.5	35323.3	12473.3	15813.3	9114.74	7240.18	20184.5	10237	7505.69	7340.46	7274.26	7874.78	7784.4
55	LPE(22:4/0:0)	81.7795	528.308	675.485	755.885	919.818	1349.54	667.578	1112.77	436.009	1416.36	1719.3	631.717	1095.63	741.944	1029.86	1203.18	1859.61	1081.56	1462.48	5444.99	3390.34	2467.23	4369.18	6824.46	2314.95	3261.49	1817.42	1723.23	3530.04	2174.77	1985.67	1752.56	1736.2	1943.93	2049.14
56	LPE(22:2/0:0)	122.274	532.34	424.958	453.277	523.89	594.164	415.231	681.359	271.037	1013.23	923.455	323.824	628.476	388.697	579.47	586.064	980.788	570.142	652.095	2796.57	1972.29	1280.33	2134.82	2533.97	1097.76	1506.84	994.677	847.004	1576.81	1179.49	967.99	879.603	859.721	879.13	998.386
57	PE(P-16:0/20:4)	411.762	722.514	1.97232e+06	1.95272e+06	2.10899e+06	2.17951e+06	1.77809e+06	1.96328e+06	1.18269e+06	3.34716e+06	3.52143e+06	1.84771e+06	2.43672e+06	1.67185e+06	2.64885e+06	2.47534e+06	2.95804e+06	1.30595e+06	1.43691e+06	2.7945e+06	3.27379e+06	2.44541e+06	4.23143e+06	6.64238e+06	2.52371e+06	5.7025e+06	2.76733e+06	2.55147e+06	3.89294e+06	2.90423e+06	2.60427e+06	2.70168e+06	2.71008e+06	2.71956e+06	2.61588e+06
58	PG(16:0/20:4)	310.546	769.501	13243.9	10877.7	11793.1	11760.6	9756.53	10808.2	8399.96	11596.9	10664	5604.66	8370.81	5395.44	7214.28	8440.51	15427.3	5360.79	6884.73	12211.7	12051.3	9742.64	16243.6	17212.9	6910.52	17105.8	8104.53	7016.46	10629.3	8776.17	11652.3	11083.3	11076.4	12348.3	12785.2
59	LacCer(d14:0/26:0)	491.985	992.712	5624.37	4702.87	5651.43	5562.56	4719.47	4574.71	3212.93	7209.82	7980.8	3630.69	4847.17	3413.48	2858.53	5408.33	6333.65	2471.83	3056.95	5559.78	6270.7	5181.58	8337.86	7272.04	3276.77	7212.5	4085.92	3533.71	4728.83	3772.48	5636.33	5755.28	5752.53	5659.11	5823.11
60	SM(d14:0/18:0)	326.114	721.547	12719.5	11853.6	12144.4	12821.4	12531.2	12961.8	8417.27	4012.17	5970.86	1983.22	3335.66	2481.2	3962.64	3669.44	3318.13	2050.95	2072.02	3133.09	4796.98	3614.46	5875.56	12781.8	5623.26	14640.8	5691.76	5065.79	8744.96	6109.47	5090.47	5345.18	5754.26	7382.02	7121.99
61	SM(d14:0/16:1)	237.821	691.502	1262.23	1214.16	1076.67	1069.08	1342.13	1072.51	813.046	816.144	942.238	414.725	674.546	456.037	618.322	560.397	773.673	303.999	365.145	813.589	659.948	588.074	732.627	2020.23	794.704	1902.46	788.944	736.069	1551.85	977.571	1025.54	972.868	1002.42	960.272	989.766
62	PE(18:0/20:1)	513.958	772.585	99582.7	91676.4	84262.3	86508.9	85020.1	76031.2	54621.5	146966	157483	67431.8	108584	70722.2	99032.6	106194	174639	70466.4	87749.5	145087	173224	143332	200296	378249	166157	326895	173799	157534	212469	183493	163359	158196	166683	159637	152649
63	PE(O-18:2/22:1)	570.952	782.594	679.701	517.442	553.134	961.232	976.249	831.112	572.817	4108.19	4331.64	2458.47	3200.98	2405.38	3844.6	3679.52	6940.81	2587.24	3429.25	6558.55	7329.44	5519.17	10024.3	13609.3	5785.12	12904.1	6515.42	5837.82	8056	6375.91	5939.42	4627.56	4646.98	4275.47	4170.67
64	PE(P-16:0/17:0)	465.158	688.528	13261.2	12474.8	11580.5	11651.5	12144.2	10753.9	7475.25	17777.6	20342.9	8856.42	13923	8571.19	12319.4	12479.9	14089.2	8437.43	7157	12694.8	15453.6	12566.5	18052.5	35823.9	14943.4	31372.2	15073.6	15428.4	21189.4	15463.9	15522.3	16131.4	15890.7	16655.6	16238.9
65	LPE(17:1/0:0)	74.55	464.278	343.452	463.714	404.124	837.821	362.102	528.839	253.608	985.029	1289.95	427.547	684.965	441.47	563.441	617.928	1712.53	673.184	748.938	2074.83	1742.21	1503.29	2562	4142.5	996.752	2511.62	1197.69	940.362	2057.15	963.687	893.186	917.444	907.412	950.633	984.564
66	LPE(17:0/0:0)	95.9865	466.294	674.197	713.854	668.692	774.414	819.088	886.752	499.64	1490.06	2739	752.114	1425.88	722.493	1336.59	1484.03	2169.2	864.879	1137.65	2750.29	2119.23	2037.22	2925.42	11072.3	2176.31	8102.7	4944.05	2400.33	5944.11	2323.69	1684.64	1577.52	1692.99	2677.99	2705.37
67	LPE(18:2/0:0)	46.7315	476.268	511.021	574.209	611.594	565.468	361.851	669.407	331.875	530.532	602.767	300.118	429.062	314.275	309.627	401.506	854.758	321.433	363.293	630.456	930.426	431.207	1182.89	1805.29	621.423	1772.45	578.836	642.721	1056.39	796.345	584.123	658.64	507.644	598.07	583.809
68	PC(18:0/16:0)	466.67	806.592	255032	236573	260908	252144	235641	218607	135892	942146	1.17231e+06	549013	782796	521442	704884	746444	1.63282e+06	667287	822351	1.46773e+06	1.71471e+06	1.33851e+06	2.17609e+06	2.67423e+06	1.09994e+06	2.14059e+06	1.11622e+06	1.22124e+06	1.36497e+06	1.10927e+06	924883	958061	991640	953863	904915
69	LPC(17:0/0:0)	92.557	554.345	648.695	914.793	636.828	679.281	773.575	520.745	261.933	1970.66	3498.4	1163.98	1663.68	1009.78	1523.42	1029.11	2057.56	1205.87	1603.39	3592.62	2985.23	2616.35	2105.46	8251.82	1622	4709.43	1898.26	2310.38	2406.25	2498.84	2078.44	2116.23	1422.04	2155.77	2073.27
70	LacCer(d14:2/27:0)	472.221	1002.7	3226.27	2890.51	3318.3	3131.57	2440.43	2752.66	1318.8	3473.39	4725.29	1952.89	2263.3	1475.32	1655.8	2004.07	3872.58	1593.48	1489.45	3429.72	3308.83	2939.46	4597.67	5862.56	2491.24	4083.12	2167.37	2435.25	4196.47	2082.19	3223.22	2604.56	2575.9	3717.15	2566.32
71	PE(16:0/20:3)	387.315	740.512	18102.1	18943.5	21680.9	20392.8	15809.7	18686.4	11511.2	33868.8	36938.7	19553	24454.8	19560.1	27193.1	25597.5	44902.6	19549.1	19882.2	37550.6	53099.6	35915.1	62283	76805.2	29096.9	76957.1	34921.8	30662.2	46458.2	37741.6	28614.2	29068.1	31843	29909.1	31202.2
72	LPC(20:1/0:0)	112.763	594.376	1372.43	1550.56	1518.73	1298.61	1475.52	1323.33	797.563	2033.9	4545.65	1434.54	2333.38	1607.77	1993.4	2283.15	4381.15	1678.88	2223.74	5285.49	4034.95	3899.6	6291.66	11737.3	3878.96	7676.03	4128.98	3860.15	3341.54	3889.53	3156.25	2981.56	3180.21	3142.3	3203.92
73	PC(18:1/18:2)	414.418	828.572	29610.5	29321.9	29299.2	33319.3	24542.5	25440.6	17123.9	33100	32734.1	18539.4	25013.6	17549	27602.1	23650.7	42470.4	18163.7	19015.1	39170.8	44824.4	33577.7	52350.6	57985.5	23523	50212.7	28195.3	23792.8	37896.7	25931	30184.4	29176.8	32004.7	31906.3	32513.4
74	SM(d19:0/24:4)	550.173	867.659	3599.32	2736.98	3164.89	3188.33	2884.47	2767.14	1756.55	3358.52	4168.09	1248.42	2987.09	1861.19	2604.11	2531.92	3727.06	1194.66	1520.32	2849.06	3727.25	2452.28	4333.95	6166.25	2823.67	4698.35	2713.67	2691.89	3681.82	2158.2	3668.15	3875.47	3259	3405.06	2727.88
75	SM(d21:2/24:4)	549.392	891.639	6057.51	5349.08	5628.34	6752.22	4509.29	13050.1	3800.66	9038.38	8913.98	4637.54	6114.28	4981.22	6264.13	5873.16	11433.6	4894.46	5342.59	11647	12188	10654	16482.4	17053	7638.35	16695.9	9955.68	7029.03	9112.83	8308.67	10385.3	6732.1	7732.23	11879.4	7343.84
76	PE(P-18:0/22:5)	459.192	776.559	295655	167330	309269	318927	145227	272055	105116	192380	206630	104705	161801	103155	153094	135703	158957	64773.9	75629.5	134864	165263	120484	201648	421494	169685	455036	185698	177542	290879	192988	183403	176152	170321	185128	172707
77	SM(d14:1/24:4)	308.321	795.555	2178.97	2161.55	2454.47	2573.46	2001.13	2428.7	1536.03	2332	2705.45	1177.31	2074.85	1079.31	1772.6	1511.34	2751.79	1392.56	1228.89	2312.53	3242.83	2102.76	3428.82	5224.09	2020.32	6362.41	2305.62	1474.09	2432.36	2040.92	1442.2	1667.43	2568.39	2296.03	1331.76
78	PE(16:0/18:1)	413.478	716.519	10394.2	5777.88	7990.65	6354.05	6427.67	7640.56	5108.2	9275.88	8614.33	5275.72	8226.17	3954.9	5863.96	6432.88	16391.8	7489.07	3029.49	7140.48	20029.2	8913.75	13474.1	22821.6	6868.77	34826.6	6974.51	6879.79	11471.6	14823.9	9118.65	15955.3	8655.72	9544.43	8815.66
79	PC(16:0/16:1)	401.045	776.551	321850	315459	350385	354212	286019	341587	212867	516235	614050	300995	413264	288233	428340	378864	575231	260557	281250	561998	688406	491046	795041	1.2305e+06	468964	1.17938e+06	516420	483042	694782	509592	195775	445924	462579	471754	481392
80	PC(18:0/18:1)	470.52	832.607	927089	965381	1.03694e+06	1.03165e+06	827701	926836	588435	1.88817e+06	2.01574e+06	1.00594e+06	1.4181e+06	970145	1.52523e+06	1.36263e+06	2.40585e+06	956332	1.12412e+06	2.29895e+06	2.35802e+06	1.8662e+06	3.15725e+06	3.96853e+06	1.49662e+06	3.20603e+06	1.71971e+06	1.57817e+06	2.23587e+06	1.65585e+06	1.51538e+06	1.56136e+06	1.5528e+06	1.55173e+06	1.47494e+06
81	SM(d14:0/19:0)	331.325	735.554	6145.96	5998.84	6291.15	6161.11	5260	6477.64	3751.92	5402.11	5474.47	2450.81	3626.72	2716.51	2958.58	3297.75	5689.27	2037.87	1971.31	3613.16	3552.11	3249.81	4427.05	10147.7	4555.45	8920.89	4219.78	3486.46	6296.2	4366.92	4393.92	4483.21	4948.14	5100.62	5052.52
82	LacCer(d15:0/27:0)	504.714	1020.74	1614.56	1925.11	1802.06	1681.37	1382.18	1479.68	1141.95	1861	2473.87	1181.18	1263.33	1138.48	950.174	1475.23	2326.45	941.552	1209.22	2088.31	1838.19	1725.07	2858.78	4118	1812.15	5022.71	1474.88	1728.45	4393.19	3134.7	1868.39	2228.17	1960.52	1626	1896.01
83	SM(d14:2/20:1)	334.876	743.549	1163.88	1280.34	1165.46	1226.81	937.919	1075.84	600.281	4654.08	5990.05	3071.98	4525.61	3295.56	5198.44	4063.01	5152.41	2333.02	2201.88	4313.95	11598	4913.23	10516.7	11592.2	3463	9727.65	4423.27	4230.16	5962.05	4433.05	3405.58	3605.04	3932.53	3507.31	4315.16
84	PC(P-16:0/22:6)	452.396	834.573	4252.48	3794.96	4713.69	4911.19	3567.53	4787.87	3564.06	7816.29	8026.99	4419.7	10664	4483.8	5998.97	5121.85	10211.7	4073.66	4647.43	9526.88	9487.02	9251.05	16290.8	15821.2	7294.31	14439.1	6356.46	6832.56	8307.64	6982.64	6219.43	7625.44	6133.6	5942.95	6070.83
85	PE(19:0/18:1)	494.827	758.57	20083.3	18462.5	16243.8	17577.6	14642	17732	12699.7	31889.6	21387.2	16013.6	14659.9	15599.2	22140.4	13925	35992.2	14456	17432.5	32300.9	37361.6	28744.5	44386	73438.2	29723.2	64733.9	33586.6	29753.5	42169	32513.1	33517.2	33220.9	20185.6	34069.4	33171.8
86	PG(10:0/16:0)	185.46	637.408	957.048	959.509	1169.14	1273.21	1173.41	1415.29	1209.35	9174.77	10332.7	5991.55	8031.64	5908.87	10053.4	9681.29	16323.3	6655.04	10296.9	18268.6	15015.2	14201.9	26326.7	24548.5	8635.95	18371.9	12064.1	8268.58	15813.9	11230.6	9259.87	9200.26	8936.5	9463.43	9282.28
87	PE(P-16:0/14:0)	367.242	646.483	1329.81	1756.25	1119.13	1374.97	1376.58	1160.03	976.105	2474.65	3530.45	1033.13	1673.96	1111.61	1111.86	1374.74	4118.07	1761.37	1839.62	3352.16	5310.08	3049.1	5861.08	8527.18	2832.6	5234.9	2279.12	1621.71	3488.22	2124.53	2295.62	2287.23	2242.27	2527.38	2209.36
88	PE(18:0/17:1)	454.577	730.538	106142	108046	116610	115328	93212.5	111630	68231.9	102277	105065	51775.7	66081.9	48582.5	72317.2	66726.4	111028	45961.2	57819.5	103715	127570	95608.1	157863	224762	96656.6	232950	109030	106557	143620	114732	104146	106117	104822	112669	105119
89	PE(18:0/20:3)	453.745	768.552	107616	106194	339784	104222	76109.8	94400.2	57251.4	113269	124413	57403.6	105562	61121.3	75581.1	294641	150646	60330.6	68716	125345	141064	149987	213860	264214	132450	227862	107383	113611	144990	141882	113810	114763	120972	118731	128835
90	PE(16:0/17:1)	409.093	702.511	59174.6	64212.8	67164.4	68221.4	61046.3	71172.5	43979	72099.3	79841.9	37740.3	52687.3	43098.3	56353.9	51279.6	70324.3	34733.5	33724.3	68200.2	81132.2	57152.1	84270.2	141705	59337.7	147110	66737.2	54786.5	86029.5	64617.3	66637.9	65988.2	65898.3	70488.6	64857.9
91	PG(18:2/18:1)	322.383	771.517	19725.4	17812	17095	13203.5	12732.5	12380.2	8167.72	24689.5	30003	16439.9	20964.2	13562	20647.5	19344.1	20587.2	8715.76	10306.7	17349	19535.9	15713.5	23140.2	54066.7	19844.6	55161.2	22933.1	21257	32271.4	24656.1	23083.5	21765.7	22018.1	22530	24087.6
92	PE(16:0/16:1)	384.406	688.493	341903	393435	452465	453061	364467	483915	263464	754205	837409	395003	541703	384130	506743	474475	546291	264535	282104	511420	780918	481926	875864	1.27489e+06	503863	1.27437e+06	572280	445014	758165	527303	510666	499563	494312	493760	517889
93	PE(18:0/18:1)	475.731	744.556	2.16101e+06	2.22458e+06	2.28368e+06	2.2684e+06	2.02784e+06	2.12581e+06	1.38816e+06	2.6458e+06	2.9135e+06	1.4309e+06	1.91124e+06	1.33584e+06	1.94489e+06	1.87907e+06	2.98764e+06	1.29103e+06	1.49042e+06	2.73907e+06	3.36954e+06	2.4504e+06	4.0199e+06	6.63158e+06	2.69143e+06	5.85059e+06	2.97799e+06	2.66013e+06	3.75781e+06	2.90621e+06	2.55938e+06	2.59603e+06	2.71996e+06	2.65164e+06	2.60189e+06
94	LacCer(d14:0/20:0)	354.834	908.619	3476.77	3395.22	4325.01	3996.47	3014.13	3356.75	2053.26	4422.68	5581	2203.2	3162.02	2142.92	1925.44	3208.6	5390.63	2178.04	2465.12	4319.63	6356.66	4568.49	6455.74	7098.93	2686.98	6719.36	3239.96	2964.27	4238.92	3359.77	3691.19	4014.77	3732	4041.64	3831.37
95	LacCer(d14:2/26:0)	452.81	988.689	2773.79	3096.54	3427.61	2678.92	3476.28	2630.68	2362.27	4277.17	5123.35	2378.75	3311.2	3957.89	1919.11	5071.33	4150.54	1566.12	2117.4	4003.53	6958.55	4193.22	6135.03	11600.7	1976.11	4839.11	2771.59	4363.37	2469.14	2416.61	3293.96	5336.41	3053.69	2781.86	3540.84
96	PE(20:1/18:1)	478.34	770.569	289109	298297	280831	282083	271888	288529	189719	263251	293507	135428	195563	132685	193758	188332	296962	118333	149321	268850	310740	238326	386250	587881	241713	534591	280407	227989	350525	251175	270993	271328	278061	267053	272867
97	PG(18:0/18:1)	401.029	775.549	191407	182340	211756	195893	160536	185492	122422	356421	408546	179322	281672	198198	257457	278386	378084	145355	181686	334404	325470	276628	428536	871156	353613	833970	418744	353740	532418	400047	358516	328956	347077	338747	350834
98	PC(19:0/18:1)	491.929	846.62	48974.1	26761.3	23230.3	24235.8	40019	25920.7	16557.9	32258.6	49128.2	21646.8	23565.9	24282.8	25855.2	23688.6	55055.9	21699.6	26617.4	51766.2	51899.1	35806.1	56473.5	83606.2	32663.1	83068.7	43136.2	32110.7	58252.9	42070.4	43632	34149.6	36504.4	32877	32192
99	PC(22:6/16:1)	334.019	848.538	7662.4	6485.49	7563.61	8007.85	7135.43	6259.68	4881.71	7447.15	9082.06	4777.81	5864.62	3868.74	6408.35	5188.78	7352.29	3051.27	3522.59	8910.4	9273.28	6219.92	10316.5	13336.1	5519	12639.8	5463.75	5135.21	7454.87	5585.5	5687.56	6258.96	6801.41	6578.26	7398.89
100	PE(16:0/18:3)	367.858	712.491	35962.6	31694.5	38859.5	28141.5	30141.2	29386.6	19891.6	46280.6	58062.4	22354.7	33862.4	32916.7	29207.5	33287.5	35452.3	13974.8	17198.7	30512.2	41805.4	26409.6	42009.1	59339.3	23307.5	55019.1	28122.9	22149	41057.4	29000.1	52360.6	36729.3	38512.5	55905.7	58691.3
101	PG(17:1/16:0)	328.786	733.507	2827.4	1421.19	2659.2	2043.76	1668.95	2244.87	1177.53	10259.2	26632.8	21966.2	16794.4	11775.2	16236.7	17129.4	8406.92	14730.5	8569.67	12284.8	18587.5	6921.46	37573	15527.5	30591.2	57831.2	13645	4745.05	36760.9	10221.4	7121.86	27296.7	15846	34642.5	15487.3
102	PG(22:6/20:2)	374.059	845.533	15591.4	17498.4	19778.2	20180.7	15182.7	21540.2	10512	24857.2	26984.4	15118.2	18422.8	14267.8	21127.5	17153.4	33305.6	13445.2	14964.7	31804.8	36938.4	26712.7	48545.8	55708.5	24480.9	57741.3	24175.4	21010.9	32758.6	25987.7	20658.9	21732.2	21434.1	20129	19247.9
103	PC(P-18:0/22:6)	514.455	862.576	4866.68	5554.17	5499.82	4703.76	4709.97	4469.18	2403.48	9673.39	981.817	4960.22	1452.6	4918.73	7202.99	7635.68	1439.44	5093.8	6509.5	1317.05	1558.84	1520.42	1844.45	1474.07	8133.5	18246.3	10023.6	454.368	684.652	10194.4	889.886	8534.2	9606.13	8817.81	981.775
104	PE(18:0/17:0)	483.628	732.553	7005.26	6659.34	6245.39	6281.93	5843	5874.6	4186.24	9492.19	10470.6	5115.22	6893	4992.45	6384.58	7724.38	10629.3	4538.36	5406.94	8463.3	10808.6	8420.14	13327.9	19146.4	8127.01	16555.1	9048.28	8443.83	11194.6	9109.97	9511.45	9699.39	9583.38	8998.9	9489.59
105	PC(16:0/18:1)	460.784	804.575	35828.9	36679.9	38601.4	43777.7	33649.1	40727	22987.6	52439.2	60259.6	29955.2	40549.9	27901.9	42092.7	38023.3	63239.1	25815.6	40187.6	61668.3	63009.7	48024.8	82429.3	101257	41696.7	94879.5	48188.9	39811.8	64442.3	45530.7	43780.7	42762.5	44223.6	43053.4	42949
106	PE(18:0/15:0)	441.311	704.522	11910.3	10991.1	10158.5	11440.6	9830.37	9978.54	6473.48	14160.9	15633	7169.51	10242.1	8534.54	11016	9889.37	21252.2	6218.95	7504.87	13862.3	19317	12833.8	20846.3	34234.1	11935.8	32510.5	15447.3	14555	19271.4	15982.2	14737.7	13898	13372.8	13574.5	13949.8
107	PE(16:0/15:0)	393.785	676.491	2962.07	2549.3	2857.59	2753.81	2534.17	3805.46	1646.14	3627.64	6372.53	2108.11	3086.64	2240.46	2882.19	3214.03	3974.13	1848.79	1844.12	4113.22	4762.88	3115.34	5281.03	12161.4	3364.01	8291.59	3770.77	3309.78	4803.39	3564.14	3646.59	3350.98	4283.98	3845.99	3608.41
108	PE(18:0/16:0)	470.52	718.539	46683.2	42544.8	47475.8	45241.3	43830.9	42090.8	25706.7	92450.1	117294	52038.8	75122.3	55492.6	87699.5	92982.7	200179	76867.1	96936.2	161614	189546	158681	258855	324462	129036	361974	216965	191861	208537	175914	141025	139136	142218	145820	137929
109	SM(d16:1/17:1)	280.703	731.532	1655.04	1516.78	1512.92	1678.29	1466.8	1270.76	968.294	1230.61	1698.19	849.228	1019.08	706.492	1106.99	876.148	1214.87	459.872	487.033	1096.51	951.227	945.727	1193.78	5335.25	2188.82	5482.23	2594.93	2202.08	2302.49	2041.58	1526.08	2594.21	2560.75	1590.05	2863.6
110	LacCer(d14:0/20:1)	307.366	906.603	486.557	505.206	591.577	522.679	383.669	438.691	281.983	854.433	839.641	396.593	568.33	368.999	410.48	522.738	919.335	358.024	393.472	838.597	912.936	628.353	1081.34	1319.17	517.558	1779.4	570.097	477.52	921.681	605.045	614.241	747.322	617.28	636.662	820.13
111	LacCer(d16:2/26:1)	458.505	1014.7	5780.66	6094.64	6075.1	7250.04	4763.33	5659.28	3272.2	8016.09	9755.41	4826.13	5700.85	4281.88	4114.38	5145.47	10188	3722.23	4639.74	9109.82	9327.42	7460.77	12613.1	15542.4	5951.97	11775	5955.06	5582.37	8491.11	5603.94	6783.74	7113.3	7029.98	6403.28	6622.55
112	SM(d14:0/17:1)	269.445	705.517	2208.23	1933.19	2052.27	1961.01	1689.01	1783.57	1206.46	1442.18	1669.26	694.197	1043.85	808.251	1137.06	966.669	1484.02	573.794	566.98	1323.87	814.137	1055.06	1440.12	3978.25	1648.46	3540.83	1633.24	1442.47	2398.27	1851.14	1732.51	1608.39	1710.29	1760.42	1762.31
113	PE(16:0/18:2)	349.693	714.498	4607.34	3542.18	5349.15	3977.39	3381.67	4024.87	3138.81	6849.69	5768.44	2640.78	6325.47	3322.67	3617.88	3452.76	5792.09	2665.89	3600.63	4933.08	6975.41	4468.29	7842.33	8059.64	3426.43	8038.7	3882.73	3151.37	5139.19	3744.93	3615.71	3756.2	4347.17	4078.7	4447.38
114	PS(18:0/18:1)	397.47	788.545	2.62429e+06	2.312e+06	2.22456e+06	2.3551e+06	2.11944e+06	1.9235e+06	1.40381e+06	1.48239e+06	1.44313e+06	596280	1.08017e+06	699200	1.21927e+06	1.05602e+06	1.26847e+06	396144	578687	967147	665520	779085	1.04725e+06	2.27361e+06	974393	1.88158e+06	1.08387e+06	994416	1.34668e+06	965457	1.70023e+06	1.64887e+06	1.72161e+06	1.65075e+06	1.72663e+06
115	PC(P-22:0/20:4)	602.68	894.637	1010.08	948.57	1214	1110.83	1015.72	1304.76	640.908	1387.99	1489.02	808.3	875.476	762.378	1051.52	769.593	1648.6	618.627	657.68	1683.17	2054.8	1186.82	2961.73	3181.32	1181.62	3289.16	1392.65	1274.31	2200.45	1392.83	1015.55	1486.45	1161.79	1220.31	5157.17
116	LacCer(d14:1/20:1)	307.351	904.597	2626.27	2404.11	2583.04	2564.55	1801.85	2151.71	1431.84	3888.58	4126.96	1892.72	2538.36	1806.86	1931.9	2622.22	3932.49	1515.71	1805.26	3648.37	4065.96	2879.32	4949.3	6873.7	2529.69	4970.85	2605.75	2473.39	3939.15	2745.32	3103.1	3025.8	3072.15	3170.04	3143.6
117	PS(18:0/22:4)	380.77	838.555	173096	142896	163854	173493	179191	173910	120171	1.33148e+06	1.44884e+06	706100	996426	719805	1.07787e+06	1.11619e+06	1.87958e+06	695559	901138	1.84572e+06	1.62749e+06	1.41617e+06	2.22904e+06	2.79559e+06	1.1367e+06	3.05683e+06	1.60549e+06	1.44736e+06	1.88615e+06	1.40127e+06	1.32239e+06	1.29791e+06	1.32231e+06	1.32419e+06	1.35574e+06
118	LPC(16:0/0:0)	81.076	540.331	16338.7	16893.3	14223.9	17279.2	17395.1	12719.5	8182.45	95473.3	234606	59267.6	94246.8	51290.6	80779	83701.9	143325	54731.5	78678.6	157439	118127	110786	145899	597795	125869	295214	157045	136475	204775	123929	102525	107656	107339	112121	115016
119	LacCer(d14:1/27:0)	472.216	1004.71	609.965	903.014	801.228	653.329	647.539	759.133	447.164	800.64	970.144	436.012	658.539	349.58	365.713	459.349	863.387	425.674	381.887	1703.78	733.812	771.061	1252.4	1398.32	493.416	979.561	519.204	438.839	828.385	535.012	646.131	873.141	708.185	663.633	463.254
120	LPS(18:1/0:0)	66.371	522.283	929.595	1544.59	1796.25	1018.89	934.185	788.281	495.977	1552.4	2902.56	781.664	1317.82	1344.06	1255.65	1886.33	3150.21	1484.22	1728.64	2898.68	2428.04	2520.84	3334.25	8349.76	1966.98	2797.18	1673.31	1848.09	3993.9	1883.69	2058.6	1991.33	2504.12	2553	2672.59
121	LPS(18:0/0:0)	82.608	524.298	2339.86	2523.48	2561.72	2368.79	2082.71	3246.05	1961.91	6660.94	8789.54	5806	9519.62	3982.65	5089.06	6353.44	9138.14	4906.46	4323.66	11099.3	9089.13	6995.49	7997.73	24124.8	4395.6	11072.5	8168.01	8373.5	18821.9	7880.33	10731.9	7853.23	7421.89	8093.91	7204.2
122	PE(O-18:2/22:2)	558.657	780.576	1383.38	1447.37	1320.41	1743.98	1212.56	1477	962.464	4707.63	4800.16	2375.2	3390.49	2651.99	4057.49	5069.71	6019.98	2423.88	2907.26	5530.21	9139.39	5590.1	9953.43	8998.06	4239.6	12115.7	3721.51	5401.58	5303.63	4017.69	10619.5	3947.68	3771.06	3472.12	3444.27
123	PC(P-20:0/4:0)	222.783	650.439	962.919	846.9	959.787	977.154	805.3	856.24	598.774	1979.92	1620.23	651.678	1086.8	857.483	1571.32	1602.69	1429.09	587.61	727.057	1654.73	2075.76	1616.29	1863.28	3761.18	1687.69	5259.17	2675.52	1586.35	3231.8	1622.83	1925.5	1889.95	2096.12	1971.4	1779.81
124	PC(O-22:2/4:0)	231.356	676.455	479.42	495.087	479.088	500.177	482.366	450.906	332.425	710.132	802.626	383.302	628.877	368.847	523.756	512.939	796.212	302.194	411.354	855.113	731.724	610.046	950.084	1854.18	714.746	1928.46	909.34	810.565	1078	896.116	743.217	703.144	726.346	742.172	706.941
125	PE(P-18:0/22:1)	567.505	784.62	24877.7	21696.9	20425.7	20075.4	21044.9	18537.1	12685.4	21075.1	39714.9	9793.05	14739.9	9699.25	13982.9	14846.1	18810.5	7542.1	9025.19	14794.1	20363.9	15017.9	23080.3	39764.1	16871.2	35372	18244.1	17288.8	21929.6	19890.4	22812.6	20891.3	22831.2	22413.8	22420.7
126	PC(P-18:0/17:1)	472.204	802.59	19945.2	21522.1	28026.6	22365.5	56314.9	17946.5	46797	16308	16730.1	8548.67	11823.2	8361.59	11570.5	11345.7	16299.5	5988.3	7249.33	15421.8	15780.3	11769.8	20315.6	41292	11634.6	24191.3	13703	12018.4	17073	11160.5	15898.3	14379.7	14852	16477.4	15497.7
127	PC(17:1/20:5)	367.368	836.541	33662.2	28859.9	26633.6	27439.5	25765.2	26011.1	19639	138020	143385	65641.9	27494.6	17475.2	25450	102075	30213.6	49558.9	13594.1	26048.6	23292.8	21944.9	31561.6	67989.7	24698	51269.8	28784.1	26262.9	44463.8	30818.3	31743.9	34451.5	35357.6	35516.9	33284.1
128	PC(16:1/20:4)	328.858	824.542	19205.8	19706.1	20974.5	21579.1	18060.9	19745.1	14286.1	23083.4	23817.5	12869.9	17245.7	12064.8	16969.9	16964.9	31099.6	11908.7	14627.6	26121.3	32021.7	25141.6	39332.3	32665.2	13639.2	30322.3	15863.4	13061.4	20580.9	15470.9	19760.7	18349.1	19267	18410.1	17741.5
129	LacCer(d16:2/27:0)	508.959	1030.73	2240.03	2098.48	2266.84	2616.94	1869	2064.5	1401.03	2995.72	3561.41	1160.68	2079.19	1457.02	1434.75	1961.37	3094.76	1315.69	1463.76	3074.25	2567.15	2567.76	3417.28	4446.6	1861.08	3960.93	2164.32	1850.76	2804.51	2193	2826.29	2761.41	2870.39	2684.8	2459.87
130	PG(22:6/16:1)	250.45	791.486	2334.74	1789.51	2001.71	553.696	1742.56	1550.8	335.19	615.397	2457.94	1496.05	1578.25	1078.06	1719.69	1685.95	2108.99	862.781	1091.31	2803.24	2453.64	1992.08	861.615	2696.07	1229.09	2925.93	1290.09	1035.69	1817.06	1294.55	1786.06	1854.63	1791.03	1754.33	1955.48
131	LPG(18:1/0:0)	66.6805	509.287	1187.68	1129.07	1060.74	1196.72	1400.8	520.627	500.95	3579.75	12124.9	2696.05	4167	2282.84	3101.59	2689.07	4777.69	1666.36	2578.66	4225.8	3444.06	2389.3	5422.17	28122.6	5087.17	11758.6	6332.17	5211.49	9099.23	5066.2	4554.35	4277.08	4467.7	4638.09	4639.58
132	PG(8:0/16:0)	134.213	609.376	193.223	182.382	222.206	264.508	239.088	318.795	251.935	4588.19	5383.26	2514.59	4002.36	2601.46	3974.11	4767.32	6521.7	2727.51	3937.43	7645.11	6185.46	5775.72	10509.8	18719.3	6152.11	13276.9	7081.25	5315.09	9714.85	6526.08	4502.72	4341.57	4397.92	4574.07	4555.77
133	PC(O-16:2/2:0)	69.157	564.329	1201.35	1235.17	1291.58	1894.65	1410.04	1567.23	846.889	8972.11	11649.2	4550.24	6858.39	4332.83	6170.25	6373.04	20606.1	5534.04	9606.13	15327.2	20485.5	16264.1	28775.9	21335.8	8650.65	15277.8	8962.54	8967.28	12226.4	8740.69	7968.35	7861.43	7709.85	7729.96	7924.62
134	PC(P-16:0/2:0)	82.136	566.346	12252.4	13247.5	10841.1	15793.8	15069.3	14637.9	8271.53	77934.4	119769	38150.9	62116.8	35911.7	55606.3	56753.8	170478	42915.8	79898.4	132578	169293	116923	220783	213025	77018.8	145359	83884.7	80398.7	112543	77020	66783.3	68508	69204.8	69775.2	72801
135	PE(18:0/20:4)	393.096	766.535	46880.7	49513.1	56663.4	55377.5	46966.8	54208.3	30203.5	63386.5	69738	36946.6	46730.9	36653	49847	47097.3	99020.6	42220.5	47899.7	88900.9	114618	85571.3	138215	158179	63047.4	142205	69380.1	64551.3	95831.4	72866.7	63356.4	67959.1	66243.7	64476.3	70914.2
136	PE(16:1/18:3)	310.969	710.475	1805.67	1735.26	1709.58	1857.06	1893.85	1976.33	1356.36	2795.46	3131.13	1490.89	2106.6	1552.6	2046.38	1978.31	2544.95	1089.54	1363.26	2444.63	3060.81	2229.84	3508.38	5929.28	1948.82	4694.99	2220.2	1833.06	3144.22	2139.42	2352.45	2318.65	2448.4	2550.63	2621.51
137	PC(16:0/18:3)	349.464	800.544	185533	47906.2	177459	176182	168495	54016	111938	64568.6	73612.9	40982.4	116621	35625.3	60845.5	114779	82351.2	56879.4	40221	76893.8	98191.9	110329	110406	204871	85993.7	217162	62092.4	85326.4	84931.8	125051	102949	60743.9	62682	60059.1	61897.6
138	PC(14:1/20:2)	367.823	800.544	58997	74967.1	42653.8	43987.1	52129.7	47829.5	28545.2	38090.2	38601.4	14825.1	25509	17162.4	8414.33	24204.2	31191.1	12252.6	17060.8	29663.5	30196.7	8602.68	36602.7	63139.7	24022.9	56620.1	27814	24598.8	38983.1	28024.7	14866.3	40683.7	38360.1	41205.3	40810
139	PG(14:0/16:0)	322.606	693.47	1315.89	1125.75	1348.23	1366.85	985.509	1259.19	810.92	1215.3	1361.61	714.961	961.825	669.912	977.776	885.743	1435.15	549.849	604.258	1189.63	1463.64	1105.09	1939.87	2392.64	972.183	2395.79	1098.45	976.875	1574.03	1177.32	1247.17	1329.22	1167.74	1208.16	1149.37
140	LPC(O-18:0/0:0)	133.501	554.381	1542.95	1505.47	1525.3	1419.94	1185.74	1181.15	923.994	3724.31	4491.67	1818.35	2772.24	1925.62	2565.1	2658.52	2704.11	1187.27	1289.68	3260.81	2204.92	2217.02	3437.44	9485.74	3655	7034.1	3429.46	3419.53	5047.3	3777.65	3096.47	2856.98	3001.42	2989.14	3047.32
141	PC(18:0/22:4)	565.638	882.617	1075.83	1052.14	1643.98	1035.99	901.426	1295.97	635.414	1634.52	913.102	496.058	714.335	493.979	743.945	581.74	1891.07	442.285	510.454	1038.49	1360.72	1012.51	1322.29	1902.56	1075.95	2014.84	912.672	741.272	1143.17	1761.26	1006.15	1180.42	2956.79	1094.51	1040.85
142	PE(18:0/22:5)	436.943	792.561	176491	170770	277588	169160	148752	161786	102664	268442	305777	139847	205842	136496	215892	202170	390007	155881	177137	310692	297305	307307	499967	651629	264587	548191	282121	272365	353657	278241	269954	260893	256048	256894	244876
143	PE(O-18:2/20:2)	447.018	752.549	45525.7	53704.7	48948.1	53857	38525.4	42563.6	24537.5	68357.2	72825.8	36944.8	52393.2	33475.8	51215.2	53872.3	71716.1	37970.8	36924.6	59948.1	105962	69960.5	120406	137826	56135.8	154931	79582.7	84284.6	76169.7	66814.2	57808.5	57528.8	59110.2	58796.8	59155.9
144	PC(14:1/18:1)	327.093	774.533	631390	615905	610877	589059	546091	575164	378768	441683	524621	209984	313943	213232	290608	300024	366092	144403	170393	333412	429443	303231	472036	494759	210445	483829	226004	191851	321245	214787	371588	369038	355832	363738	337692
145	PG(22:6/18:1)	367.433	819.517	8236.76	8933.2	10509	11345.4	7514.78	9668.77	5670.39	10294.5	10819.4	6152.16	7087.76	6072.87	8913.5	6778.3	16750.9	7355.78	7162.94	16140.2	17747.3	13485.1	24332	29452.8	12582.8	30759	14129.9	14043.2	16834	13662.3	11035	11276.8	10523.4	10828.3	9540.22
146	PG(18:2/16:1)	313.663	743.485	604.478	553.682	585.052	566.877	508.015	660.273	390.593	2725.49	2657.57	1303.27	1930.06	1271.99	1602.95	2102.91	1892.04	580.789	888.596	1732.51	1679.51	1247.72	2208.48	4734.03	2949.85	6575.48	2245.36	2988.14	3652.92	3594.31	2186.22	1915.37	1910.45	2643.08	2491.94
147	PS(24:1/18:1)	483.743	870.625	50337.6	46614.8	43498.3	46942.8	43569.2	44811.3	32891.5	12018.9	21275.5	9338.02	13848.4	9991.79	13943.3	13520.9	20848	10111.1	10977.2	21787.8	22228.4	14546	26735	45025.1	11577.6	40280.7	22209.8	14438.5	28671	18239.5	27196.2	27255.2	22943.6	27496.2	25924
148	PE(P-16:0/20:5)	417.815	720.49	7977.91	6627.6	8110.12	8009.09	7424.24	1742.19	4123.41	30342.3	37512.9	16673.4	5341.49	16001	24432.9	5446.5	12685.8	22167.8	28105.1	9699.25	11489.5	8753.02	60006.7	22506.1	34063.4	74327.3	36939.2	36313.9	50469.6	36879.1	29726.7	30634.3	7896.39	31163	29345.3
149	PS(24:0/18:1)	494.113	872.635	24304.1	15872.4	16039.5	17251.5	20994	22805.2	11087.7	10112.2	9545.69	2461.12	5837.58	4370.83	6957	3268.67	12108.2	4172.56	4792.56	4156.1	13321.9	8720.47	14566.8	21882.9	9386.48	20209.5	11360	8180.97	11874.9	8701.95	11540.9	13534.4	12878.7	13024.6	11418.7
150	LPG(18:0/0:0)	49.448	511.293	368.943	357.474	447.072	340.334	348.618	382.245	243.075	400.324	533.156	254.222	342.461	284.423	380.257	340.017	546.932	263.863	290.245	564.375	638.126	263.877	915.204	7979.81	924.543	2528.43	1261.15	1295.86	1976.33	1053.16	730.366	921.385	566.324	453.191	767.48
151	LPI(16:0/0:0)	63.112	571.287	484.698	499.221	509.578	476.743	563.693	421.507	270.854	3681.86	8324.13	1845.77	3175.25	1985.76	3145.41	3675.74	6198.21	2097.81	3746.96	7999.12	4361.32	4652.76	4452.5	27193.4	5670.3	6400.46	4396.02	4324.2	12060.9	4551.45	4392.07	4570.5	4923.56	6222	6206.09
152	LPS(22:1/0:0)	113.919	578.345	825.396	1446.48	1242.28	2390.04	856.683	1548.96	727.292	1727.32	2178.68	580.696	1033.33	1182.34	1003.82	1213.4	2151.36	1960.72	1548.6	12232.1	4662.39	3439.41	7863.35	7392.6	2730.96	2645.71	1419.88	1245.03	3436.52	2440.36	2166.45	2199.22	3061.82	2984.92	2364.46
153	PE(17:0/20:4)	412.625	752.527	21029.2	24200.3	23047.9	26932.1	14349	19768.7	11752.7	17447.6	10905.7	9636.22	13842.9	8592.55	19817.6	14424.9	24086.2	11533.1	11117.3	22083.4	28238.6	19301.8	36460.6	42460.4	17855.2	45447.1	9457.81	18816.6	25489.2	21823.3	18225.7	20003.1	20104.9	19566.6	22210.5
154	LPI(18:0/0:0)	76.26	599.319	4495.39	3899.67	3792.45	3996.1	3558.23	2670.01	2532.92	19878	27254.6	9340.83	15353.3	9840.74	14777.8	18507.1	22040.9	7955.53	11851.4	27691.8	12083.5	15799.4	14969.1	76565.6	24991.6	29342.3	21501	20524.8	47418.7	21535.3	20550.8	19385.8	20199.2	21374.9	22366.8
155	PE(P-18:0/17:0)	505.682	716.557	5991.14	5002.95	5378.51	4826.66	5470.41	4532.55	3740	6000.4	7045.32	3074.64	4514.17	2825.94	4025.53	3997.89	5343.39	2266.19	2725.91	4290.66	5835.6	4378.61	6307.36	11957.5	5260.01	10793.2	5369.75	5675.54	7002.87	5152.58	5799.73	6139	6337.68	6170.21	6146.98
156	PC(16:0/20:4)	401.882	826.558	21411.3	19479.9	20161	20686.2	18564.9	18871.2	12953.5	25873.5	21406.5	12451.9	17331.2	9945.46	18886.7	19889.6	22137.2	7739.63	10703.3	21507	21310.3	17252.1	28657.4	36906.4	15513.2	28605.8	16123.5	13601	21881.4	17237.5	21918.3	21166.1	19870.8	17259.5	17393.7
157	PE(P-16:0/22:4)	445.933	750.545	418788	403133	420124	419612	344379	368100	243512	567200	624331	314598	459505	297168	458621	446680	468520	181199	221391	380627	475345	363139	597875	1.24037e+06	498173	1.11097e+06	590716	514981	704246	605997	509874	499502	525334	522297	510163
158	LacCer(d17:1/27:0)	525.677	1046.75	1073.98	1410.78	1448.9	1374.03	1264.45	1310.73	912.873	2032.03	1114.58	1087.05	1261.66	1079.49	1136.18	1435.88	1709.66	808.18	1079.53	1674.76	3142.47	1760.76	2773.22	15445.7	5348.68	9411.65	5390.42	5104.78	9067.13	6946.25	3500.01	1917.04	3482.56	3163.49	3564.67
159	PC(20:1/18:1)	472.249	858.621	285399	313555	300562	317397	286689	299524	198787	166381	177745	106120	119701	106235	124824	110425	235422	97379.5	112698	227307	250749	192335	260969	278203	116286	245989	136805	117497	167385	126384	205120	187320	201916	200058	185436
160	PI(18:0/18:0)	425.012	865.578	8850.14	6536.9	7484.03	8022.27	7911.69	6574.78	6697.8	47369.7	51370.9	25343.6	36547.7	24323	46226.4	45314.6	51330.5	16914.7	24592.6	49552.5	35059.4	35709.4	64353.6	73355.6	34712.7	105181	59275.8	56650.7	52017.7	49271.2	43904.5	46738	44552.5	41860.9	40857.8
161	PA(16:0/16:0)	392.216	647.464	10751.2	11378.6	13836.3	2830.36	15881.8	13030.5	11313.9	95482.3	141145	59205.2	95411.5	27527.6	109694	133253	95056.8	35648.2	24681.2	42825.9	30806.1	70435.2	104600	375603	166318	396553	93238.3	229435	202289	195418	93803.1	120318	120839	107120	105714
162	PE(P-16:0/14:1)	359.248	644.465	2647.24	5265.59	4346.95	3311.19	2937.29	2884.43	1791.72	4973.17	3564.54	2596.69	4082.21	1566.29	1177.75	3721.61	4247.16	1066.28	1176.74	3496.19	3204.16	2363.39	6119.86	15463.5	3611.23	10114.5	4738.1	1665.08	6044.43	4611.93	5363.33	3180.23	3061.02	3211.05	3218.55
163	PE(P-16:0/18:3)	385.277	696.496	7031.5	7541.26	9400.56	9142.04	8038.14	9979.86	5765.89	11698.9	13367.5	5950.33	8861.91	6746.34	9310.22	7867.72	10928.6	4575.3	5353.92	9066.78	14201.9	9720.94	17060.4	26540.1	10784.6	28270.6	13610	10289.1	17052.2	13532.9	10603.3	10481.7	10066.2	9893.47	10562.2
164	PC(P-18:0/20:4)	449.457	838.594	11648.5	25017.6	13824.4	22084.7	8865.81	11460.3	7305.95	10676	15309.9	15158.3	6163.69	7682.66	10955.9	11279.1	14483	5478.3	10766.5	11937.4	13037.6	10339.3	30776.8	18067.1	7044.73	13822.5	8324.11	7438.21	10131.3	7716.36	11804.1	12007.3	10656.1	6627.24	10500.5
165	PE(P-16:0/22:1)	534.484	756.592	226542	212102	201712	190139	211797	182854	127904	231586	276316	116345	175349	110088	169067	168787	176889	72417.4	82912.1	143091	188355	138252	209651	452046	192251	434534	213842	191347	266737	221265	224429	230672	233946	232699	230186
166	PC(18:1/16:1)	385.336	802.56	1.59479e+06	1.65586e+06	1.76771e+06	1.78718e+06	1.49178e+06	1.73631e+06	1.02497e+06	1.72864e+06	1.1915e+06	930513	827315	877531	834518	818769	1.73864e+06	731551	827715	1.70497e+06	2.03035e+06	1.50612e+06	2.42884e+06	2.73827e+06	1.11052e+06	2.56814e+06	1.26996e+06	1.08334e+06	1.78643e+06	1.22836e+06	939843	911062	901223	826618	950660
167	PS(18:1/18:1)	353.301	786.528	451956	403838	344692	372551	333077	307154	208265	153070	167304	71748	118377	76086	120566	70627.3	114624	39582.8	54737.4	100741	71794.5	61716.6	97596.8	253348	104906	393655	217280	91523	148537	111958	365806	209606	208057	216699	206907
168	PE(14:0/20:4)	333.985	710.475	3106.83	3491.03	3546.39	3352.91	3194.74	3856.9	2277.17	1437.5	2241.72	1177.77	1272.69	1350.36	2002.23	1540.02	2358.04	1345.28	1329.58	2378.12	2531.85	1997.45	3773.47	5711.05	1494.11	4289.15	2130.64	1276.42	2124.72	2223.74	2439.98	1832.12	2051.35	2200.68	2079.54
169	PC(18:0/20:4)	427.324	854.589	21331.1	22867.2	23800.6	24131.1	18569.3	22378.5	13873.4	75888.4	77276.3	42953.4	56058.5	41776	56974.8	61510.7	229908	46410.8	107361	207387	113016	93635.1	149840	124422	52485.1	101427	52621.9	51422.5	73605	53654.9	53920.4	52489.8	54296.1	52634.6	52196.8
170	PG(18:0/16:0)	396.592	749.531	50671.4	44610.9	53173.5	49235.7	43464.1	44716.1	27815.2	167066	194480	88435.6	121020	93909.7	111265	124084	136066	53174.4	69681.1	117297	128923	105660	160126	429781	178825	346320	192879	186557	256311	191067	172890	170676	172177	180577	179383
171	LPC(O-16:0/0:0)	95.408	526.35	4154.24	4660.79	3960.12	4561.7	4331.68	3220.33	2293.84	17406.9	32327.1	9007.22	14021.6	7737.44	10516.9	12600.2	10682.1	4845.09	6079.87	15603.3	9164.83	9404.78	12790.2	61837.5	13558.4	30276.1	14042.1	11955.9	21603.6	12891.8	12730.6	12889.2	12957.6	12997	13225.4
172	PE(5:0/18:0)	107.164	564.364	179.989	205.208	196.136	300.085	171.628	273.037	140.898	398.25	362.644	160.853	238.373	182.183	211.347	264.473	1132.06	782.15	727.37	4412.41	2353.82	1708.25	3125.51	1251.88	474.509	651.856	441.166	312.317	845.889	454.259	605.158	447.546	685.193	717.375	711.551
173	LacCer(d15:1/27:0)	504.852	1018.74	6538.15	7037.62	6391.65	7527.93	5834.61	6641.08	4589.46	7961.3	9547.61	3871.01	6170.92	3996.88	3363.03	5566.4	9473.03	3677.48	4661.68	8650.03	8913.18	8295.18	12295.9	17801.4	7567	8045.91	7275.23	7754.81	9539.1	5177.87	8436.83	8553.71	8481.7	7684.18	7431.43
174	PS(18:0/20:3)	376.014	812.542	102273	106916	94304	83651.9	76689.7	69733.6	49693.8	89222.9	68115.6	21688.2	32973.2	21949.8	33651.3	46993.4	36584.1	13762	16269.7	65186.2	29578.6	25647.8	41872.2	72623.3	32389.6	64025.2	34857.1	32789.1	45235.1	35025.3	41923.1	43786.5	43742.3	67986.3	41949
175	PE(P-16:0/22:2)	503.871	754.576	299790	287409	285703	258347	271004	268556	176663	406819	426743	177417	274599	190685	286560	282714	273053	110442	150611	236756	317797	210974	323454	650487	278289	599681	316379	272860	410214	290623	309029	342687	313532	311914	332433
176	PE(20:2/18:1)	436.043	768.544	87162	93098.3	90836.3	93681.6	70663.1	77746.1	67615.7	119335	124894	64362.4	86241.5	74214.9	87624.5	82587.3	177501	58987.2	68454.2	117178	161975	117613	185711	273295	104196	232569	115555	110950	148808	117143	108096	107924	105193	107024	107209
177	LPC(O-18:1/0:0)	99.382	552.366	817.973	908.072	831.381	987.566	1009.8	833.306	478.838	1794.62	3527.2	873.676	1482.17	832.769	1291.65	1365.06	1514.55	953.783	1058.29	2862.89	1580.25	1621.39	2503.98	7235.93	1462.13	3427.65	1513.96	1312.22	2328.6	1810.11	1834.14	1525.01	1729.57	1846.17	1619.57
178	PG(12:0/16:0)	192.6	665.429	164.215	180.335	190.357	189.151	164.111	200.279	136.238	549.955	643.859	243.838	418.443	296.506	396.335	493.319	553.175	217.602	279.277	499.909	532.33	440.594	769.467	780.725	344.785	799.281	409.033	355.382	592.279	397.73	393.462	416.262	370.973	441.597	413.009
179	PE(16:0/20:4)	387.944	738.508	147078	156040	180823	167819	135562	160132	106221	295713	330570	186425	227639	163572	318510	228904	360756	164830	182220	342521	496005	332245	584228	681957	265411	681304	423331	287204	443338	320068	246487	259663	274421	264693	268602
180	PE(18:1/20:4)	393.103	764.531	485027	519059	582090	549115	464540	560902	310525	678836	751527	400612	497698	383588	527666	503111	1.17357e+06	457012	538797	980748	1.27592e+06	929739	1.51762e+06	1.69718e+06	673937	2.27498e+06	748078	704241	1.00167e+06	788887	683390	675669	735216	694865	726660
181	LacCer(d15:2/27:0)	491.054	1016.72	119225	100353	111313	111525	86220.4	83434.3	60317.6	111713	125734	53595.7	73318.9	49062	34829.7	74212	114920	42741.6	52426.2	100434	105060	87384.9	131676	158664	66926.8	110572	69096.7	66951.7	88174	65471.7	96965.1	97538.1	99311.5	98632.1	99173.5
182	PC(16:0/14:0)	352.267	750.525	22685.2	19725.3	23922	22420	19864.9	22536.8	14180.1	35303.7	38950.7	19474.5	25953.6	19360.6	25349.9	25467.4	35119.3	13296.2	15153.3	29997.8	29982.4	26777.3	41202.1	66968.6	28235	59976.8	29054.9	25128.8	41739.1	31382.4	30561.7	29729.5	26429.6	28799.6	29400.7
183	PC(O-18:2/17:1)	430.296	800.575	9193.3	10075.2	9840.61	8593.83	6944.31	7629.37	5890.2	8610.66	8697.38	4672.06	6376.4	4075.9	7146.01	4844.95	8295.72	3522.88	4102.1	7304.87	8917.6	7071.9	11263.1	14578.9	5481.42	11996.3	5892.71	5500.83	8301.67	6107.8	5982.87	7560.34	6902.63	8105.05	3648.31
184	PC(16:0/17:1)	400.952	790.559	664503	633554	691834	671147	573475	623068	448860	599099	665395	310518	451887	322779	498914	435734	709104	284388	334910	659406	682897	543322	888477	1.22157e+06	490810	1.11754e+06	563039	489622	718913	552118	619012	607975	630852	622844	641275
185	PC(18:0/20:3)	447.48	856.603	33742.1	39294.5	67141.8	63258.8	36685.9	40388.1	26309	75666.1	123762	62452.2	87139.5	42264.7	64149.5	58293.3	108058	41104.3	69628.7	89006.1	96982.9	79125.1	201221	225199	64423.6	199877	73567.7	65484.4	95822	101017	64240.3	64675.2	65941.3	65724	65426.1
186	PC(16:0/26:0)	624.483	918.713	1253.11	1152.61	1466.52	1496.52	1269.24	1348.58	1102.77	1266.14	1532.02	924.399	1135.9	915.804	1280.34	1266.38	3111.04	1237.96	1921.96	2846.37	2627.41	2626.09	4082.71	7972.13	2903.96	8095.79	4239.51	3443.71	3932.13	3645.49	2694.52	2679.65	2654.03	2437.07	2586.44
187	PC(22:6/18:2)	340.897	874.552	25027.6	6655.28	10923.9	11087.8	22541.3	11069.3	6272.6	18093.4	28286.1	15151.4	12859.9	14661.3	23839.9	21304.8	9321.01	3049.16	3956.25	8424.01	8396.54	6303.54	10816.7	56461.1	23245.7	48912.5	7969.47	11860.6	33562.3	7288.17	8423.66	26345	25287.2	8643.43	25821.1
188	PE(O-18:2/17:1)	437.8	712.526	21004.4	20787.6	21871.8	22844	20850.6	23521.4	12727.9	29613.4	34832.9	16942	24354.1	15492.2	23968.1	23419.4	35389.6	13899.4	15330.5	29018.2	37474.6	23100.8	45174.4	64636.6	28245	65618.6	32463.7	26173	40553.4	31056.5	29523.5	27477.1	29360.3	29136.8	25797.2
189	PC(P-22:0/6:0)	296.732	706.501	2829.14	1349.12	2764.67	1457.4	1443.49	1624.8	1198.89	2259.58	2168.97	1483.07	2149.56	1024.34	1552.05	1463.22	2143.27	922.125	1065.76	1507.12	3133.1	1326.59	2707.56	3847.8	2264.62	5599.54	2526.94	2407.31	3527.36	2720.88	1845.39	2183.83	1668.41	1572.14	2333.82
190	PC(O-22:2/6:0)	319.939	704.486	654.072	613.472	713.276	630.95	943.72	706.563	461.931	1251.04	1447.51	714.902	950.107	677.29	1358.15	951.079	867.38	301.783	391.034	612.789	690.292	588.545	1015.49	2313.3	1056.82	2101.06	1131.2	919.561	1393.14	855.337	891.236	954.012	970.502	901.797	1434.02
191	PS(16:0/22:5)	321.722	808.511	10067.6	8659.22	22361.1	24124.4	8141.69	8717.73	5894.41	14710.2	14933.9	7617.38	10801.1	7225.67	11497.3	10597.7	14020.6	5038.6	6192.54	10751.5	9018.2	9834.21	16295.1	29845.7	11496.4	30747.7	13402.2	11495.5	16856.6	13061.8	12665.7	11976.1	12353.5	12249.1	12398
192	PE(P-16:0/18:1)	456.222	700.53	2.24778e+06	2.22886e+06	2.28918e+06	2.35559e+06	2.23267e+06	2.33796e+06	1.47395e+06	3.51919e+06	3.8926e+06	1.88855e+06	2.5662e+06	1.93635e+06	2.69885e+06	2.42837e+06	2.96051e+06	1.23594e+06	1.44379e+06	2.80874e+06	3.46191e+06	2.36794e+06	4.22732e+06	7.89221e+06	3.09848e+06	7.7235e+06	3.85138e+06	2.96821e+06	4.56417e+06	3.53205e+06	3.07292e+06	3.09458e+06	3.06633e+06	3.18375e+06	3.08032e+06
193	PS(22:1/18:1)	514.144	842.584	5304.21	5267.34	5662.2	5368.08	5280.42	5540.54	3005.82	5092.71	8251.77	2740.37	3701.89	2377.6	4048.46	3298.97	5644.13	2251.85	3718.34	5508.69	5867.7	5129.27	7049.09	10718.9	4139.86	10182.9	5203.1	4188.12	7345.1	4513.05	4984.08	5236.66	5511.02	5219.1	5628.3
194	PC(18:4/18:0)	354.795	826.558	45467.6	35760.1	46037.1	44969.1	25819.1	42169	28444.6	55464.6	54778.4	28197.9	41741.8	28285.7	39692.4	33390.3	68650.2	26293	30728.8	59740	66385.3	51112.2	86776.1	90633.7	37766.9	84301.1	41702.8	37165.9	58002.7	39714	39727.3	48252	49147.8	39772.4	41910.3
195	PE(P-16:0/18:2)	420.427	698.513	544990	402171	403142	409523	398768	428880	272466	849680	866071	409801	721284	499342	617683	566470	588350	257974	282856	525115	621587	466284	973480	1.74326e+06	620060	1.66224e+06	798258	647430	972047	755549	609242	605450	641161	617505	662915
196	PC(P-18:0/16:0)	493.005	790.595	42769.4	40192.7	42148.1	40795.7	32808.3	32918.4	20506	40528.7	45598.5	22336.3	30365.5	20915.3	28195.4	30281.5	43589.4	17332.1	21042.7	38678.3	44768.3	36358.8	58772	83154.2	36105.7	69296.9	36353.9	36494.9	48682.8	37054.3	41266.6	41153.9	41745.4	41560.5	41141.5
197	PS(18:0/20:4)	367.931	810.526	11955.5	10181.2	10884.2	11127.1	10115.4	9925.9	6855.47	20305.2	27145.2	10886.9	16488.9	11509.1	15733.5	18682.7	19301.4	7749.24	9050.97	16668.1	14510.2	12808.7	20880.3	35850.9	14118.7	33965.5	17309.1	15061.6	26395.8	18609.7	16310.3	15922.5	18510.4	17632.1	18652.5
198	PC(18:0/18:0)	511.445	834.621	8253.96	7494.33	8325.75	8327.91	8018.07	9158.36	5321.47	21374	25512.1	11773.5	18094.9	12755.5	18539.1	19929.4	46555.9	18582.9	22885.9	41861.5	43662.7	35562.8	57154.9	65543.4	27686.3	54108.9	32595.4	32787.3	38311.7	28324	27014.1	26075.5	25913.2	24446.4	23764.3
199	PC(26:0/18:1)	624.521	944.728	2202.51	2082.86	2413.89	2303.17	1744.98	2263.19	1914.44	2186.72	2361.31	1132.34	1668.49	1328.58	1762.04	1915.12	3871.92	1674.31	2048.11	3540	3515.31	3573.07	4999.61	9844.19	3543.81	8473.42	4193.43	3614.94	4353.9	4060.25	3243.59	3474.82	3263.24	3110.48	3199.92
200	PG(18:2/22:6)	354.263	817.511	2036.66	2140.9	2926.53	2118.93	2056.61	2064.47	1587.85	4971.34	4952.31	2578.89	2944.65	2609.81	3372.61	3217.95	5650.92	2339.22	1836.15	4441.85	5772.12	3824.48	8645.03	8131.75	4443.1	5681.26	3719.94	3634.52	5171.36	3878.44	3181.17	2919.54	3754.94	2894.29	2572.26
201	LacCer(d18:2/26:1)	496.557	1042.74	1380.86	1221.38	1398.51	1312.48	1167.18	1233.21	715.947	1826.75	1802.88	832.372	1273.69	806.908	618.169	1236.96	1911.17	724.256	765.539	1721.12	2058.12	1419.75	2831.22	4756.05	1424.58	2666.05	1367.86	1330.31	2200.96	1499.01	1166.21	1610.06	1556.26	1531.55	1432.83
202	PC(16:0/15:0)	360.156	764.552	8285.21	13911.1	14325.8	18102.7	13077.8	15150.9	6696.2	13443.2	20833.6	9542.46	11460.2	9291.46	11808.4	11025.3	14585.9	7784.11	6021.01	14011.4	8502.94	9517.35	24579.3	33847.2	13586.7	29218.3	14870	8433.03	12973.3	15274.4	14346	14694.2	15164.6	7169.99	5154.56
203	PC(14:0/20:4)	360.767	798.536	5062.8	4328.92	5080.57	4759.56	3080.56	4374.86	3285.68	8168.58	8209.18	4521.06	6450.16	4524	6499.1	6305.63	11430.1	3504.37	4587.92	8458.49	9706.16	9514.33	11392.1	13972.9	7020.75	15584.7	6828.98	5975.55	9177.89	7155.54	9470.98	7584.54	7425.29	6806.29	6352.36
204	PE(15:0/16:1)	358.351	674.477	3987.58	4317.68	5009.88	4930.84	10408.6	5295.37	2728.11	5308.36	5811.04	2782.79	3751.42	6040.48	3843.63	8624.51	4128.52	1877.36	4230.8	4353.35	5170.11	6215.69	6044.24	14425	4987.5	17736.2	5219.75	6764.75	6374.06	5142.93	11151.7	4717.59	10794.4	4930.46	11613.4
205	LPI(18:1/0:0)	64.646	597.303	1126.27	949.472	1642.8	953.647	1282.51	626.02	589.926	3247.72	7521.57	1712.18	3009.89	2867.07	3077.2	3146.83	5990.37	1874.29	3577.23	6985.82	4213.72	4059.58	4356.87	26139.6	5342.27	7781.9	4726.13	4762.6	10886.2	5054.14	4744.41	5102.2	5435.52	5880.19	6866.22
206	LPC(16:1/0:0)	88.5535	538.313	486.805	583.068	595.94	743.179	554.208	709.219	346.992	1718.6	2088.99	833.211	1278.28	909.282	1077.18	1262.21	2250.99	944.104	1336.93	3243.5	2722.54	2185.91	3313.32	4297.44	1722.99	3883.43	2020.62	1576.46	2516.63	1730.58	1517.59	1358.1	1491.64	1601.66	1664.39
207	PC(P-22:0/8:0)	394.746	734.531	80401.2	82502.3	84969.3	82295.7	66872.4	71575.4	44089.6	48662.8	54909.3	26073.6	55931.2	24886.9	36092	33546.2	54485.8	24078.6	25577.7	50628	59895	46141.9	73525.2	103093	41270.7	91840.5	42862	39633.8	56195.8	46304.1	59530	61122.3	62773.6	59519.4	60938.4
208	PC(22:6/18:1)	383.501	876.566	23558.4	22152.2	20054.5	20709.3	19035.5	20083.8	13487.4	23002.7	26301	10006.1	16471.1	11413.1	18661.1	16823.2	20090.9	7026.81	9056.7	17957.8	16242.4	14650.6	22496.6	33527.3	14595.2	33743.7	15982.1	13446.9	23035	15153.4	19905	19275.3	20476.7	20621.9	20214.8
209	PI(16:0/20:5)	354.861	855.515	1652.87	1600.7	1672.14	2010.57	1972.08	2445.35	1022.09	1434.91	1666.36	790.279	522.84	864.57	1944.3	986.522	1591.76	656	704.077	1625.43	2317.49	2018.26	3326.86	2987.94	616.645	2850.72	1322.96	1120.92	1857.15	1268.31	1593.29	1444.21	1262.27	1064.7	1365.61
210	LPC(20:4/0:0)	66.909	588.33	865.291	898.954	1420.63	1280.76	828.281	1106.1	681.478	5232.67	6254.68	2687.74	3877.21	2450.24	3388.2	4188.08	11369.4	3142.25	5789.59	10129.4	11268	8718.37	15514	10688	3739.13	6793.57	3932.46	3791.49	7056.17	4132.99	4081.1	3949.43	4028.08	4159.73	4153.53
211	PS(20:1/18:1)	401.015	814.559	123225	178680	169246	112128	173897	167284	119098	50635.9	53985.4	24412.8	91263.7	24756.4	42208.1	39637	58911.3	14891.2	19014.3	35038.3	30850.1	30412.2	39074.9	71011.1	72339.5	54481.9	35543	32056.6	44995.1	35321.5	72985.3	64226.6	67780.1	62654	60315.2
212	LacCer(d14:1/22:1)	364.171	932.627	993.939	547.647	575.675	834.9	371.842	714.306	434.336	1723.23	1858.83	999.25	999.386	761.126	876.451	1055.82	1821.05	744.49	755.253	1758.83	1736.51	1087.56	2222.58	2132.47	958.297	2165.33	1064.26	899.24	1608.41	976.845	1131.68	1096.78	1073.15	1270.28	1015.15
213	LacCer(d22:1/12:0)	354.838	906.612	21007.5	19504.9	22691.9	22705	17161	17681.1	10627.8	26079.3	27939.7	12419.1	15928	11915.5	10151.4	16576.5	28007	11519.6	12727.9	24107.8	29821.5	22855.7	37063.1	35822.3	15843.7	31283.6	16031.7	15750.7	21026.6	17398.1	20790	19867.6	21855.6	22324.8	21266.2
214	LacCer(d14:0/24:0)	451.337	964.678	234.571	219.543	445.704	307.013	168.978	151.383	121.322	576.327	493.898	250.809	266.247	207.075	183.057	339.003	371.115	188.715	258.319	355.171	321.559	279.647	733.742	659.473	76.5586	376.403	223.827	250.19	227.263	197.742	268.552	330.561	248.977	295.458	245.698
215	PG(17:1/16:1)	286.147	731.486	1966.72	1874.88	1741.36	1609.48	1699.46	1683.83	1126.89	3020.34	3343.61	3122.63	2367.76	1542.02	2177.53	2091.49	2332.62	933.642	1122.98	2078.57	2093.91	1909.23	2659.08	4610.1	1725.57	4980.28	1905.9	1870.48	3109.52	2171.77	2715.13	2348.77	2302.56	2615.24	2433.05
216	PE(O-18:2/18:1)	498.115	726.533	6584.05	6144.13	5733.75	6300.81	5391.17	6806.02	4397.96	11755.7	12803.7	6018.31	8782.82	6107.1	8812.85	9188.34	13205.4	5200.53	6065.62	11367.2	13794.3	11422.9	19428.9	29615.6	12137.2	28624.3	12704.7	11550.3	17004	12328	11178.4	10382.1	11207.5	10537.5	10348.4
217	LacCer(d16:1/27:0)	513.983	1032.74	803.139	644.166	749.903	737.428	620.855	426.433	289.942	1427.98	1993.44	711.866	1153.08	650.573	1324.86	1283.66	2062.21	632.714	941.083	1719.58	2305.07	1656.93	2552.02	2555.19	901.611	2263.91	1364.12	971.637	1523.02	1284.37	960.804	1120.11	1500	1302.14	948.399
218	LacCer(d17:0/27:0)	559.455	1048.76	601.174	585.324	788.478	1234.09	565.06	540.947	332.495	829.435	1024.46	579.181	1617.82	446.517	663.559	2161.68	1118.79	413.278	512.57	1011.85	1368.06	836.734	1319.69	6167.01	2350.22	4472.75	2114.52	2081.68	3749.68	2712.45	2656.79	1262.85	1627.15	1499.83	1399.88
219	PE(14:0/16:1)	329.545	660.463	10619.7	11334.2	11057.9	11008.6	11282.4	11901.9	7661.7	11618.5	14275.9	4367.27	6818.68	5064	5282.42	5018.19	6786.4	3592.07	3477.31	6153.25	8020.48	6136.41	11339.8	50091.6	15578.6	23452.7	11232.5	6473.51	15944.4	8823.61	9755.62	9266.77	9223.79	8773.48	9482.24
220	PE(16:0/14:0)	375.79	662.476	24570.6	24636.1	26340.4	26971.2	21590.1	23619.1	15061.8	16153.5	16858.3	6568.55	10741.4	7407.71	9686.37	10633	20171.2	9151.79	9936.33	17251.6	23983.9	18153.6	26718.7	60862.4	19647.2	40546.4	21859.1	16227.2	25048.1	21059	21361.3	20539.1	22885.7	20731.6	21568.2
221	LPI(16:1/0:0)	50.033	569.271	368.791	349.329	481.157	420.214	267.694	368.113	209.073	723.067	1598.96	364.096	773.818	390.559	466.462	514.487	1452.63	578.185	894.383	1612.92	1272.29	1360	1213.54	5791.95	928.122	1673.7	741.488	879.808	2542.11	865.901	947.129	915.39	871.406	1003.38	1027.12
222	PC(P-16:0/20:1)	495.668	816.611	169359	176002	174160	167231	133223	142828	96700.9	107259	115801	52967.8	79468	54423.3	83026.1	74354.8	98533.3	40324.1	49440.3	93660.9	98509.1	80601.5	125880	165394	70735.1	147665	77436.1	70088.2	99821.9	72334.5	116693	114262	114796	117148	113257
223	PC(O-22:2/10:0)	401.778	760.549	154762	153424	168442	159391	131377	145510	90436	145436	176237	76415.7	109620	78283	115895	101997	117699	48673.5	56609.8	110197	129198	94593.1	160341	203298	84352.5	207543	96554.2	77351.3	123444	94425.7	127856	125182	133276	130002	129857
224	PC(P-22:0/10:0)	429.069	762.549	83564.2	68920.8	70252.4	73541.4	57262.5	69184.8	40426.5	64611.5	75056.5	35867.1	42473.2	35838.3	43734.5	45002.5	56659.7	24373.3	26646.4	51926.4	64130.6	41219.7	75941.2	106050	38007.9	103705	49262	39875.6	65047.4	51452.3	52282.1	46011.1	49545.6	59813.6	50971.4
225	PE(P-18:0/16:0)	493.972	702.545	57592.1	45592.6	51590.6	50202.6	46223.1	41351.9	29377.8	148874	169970	83186.8	113468	68900.6	121545	130775	85887.2	37321.4	53036.9	71886.2	86818.2	69315.8	122748	288495	119060	300017	175158	164262	200195	157642	133087	138364	140887	139247	138040
226	PS(16:0/16:0)	340.944	734.496	8212.41	7487.5	9677.67	8834.27	11002.5	9054.84	6114.89	6420.11	7352.94	3712.05	5024.82	3624.65	4956.75	6187.01	9153.6	4283.88	4441.77	8695.46	12677.9	7181.67	12695.8	12105.3	5707.77	14333.4	5432.49	7138.77	9211.53	10910.7	8836.87	8446.15	7811.5	9369.76	11967.9
227	PC(20:0/4:0)	193.698	666.434	95.8289	94.0082	108.36	104.323	83.5581	110.51	69.3861	1293.65	1679.77	618.512	1013.04	703.294	826.389	1196.3	867.811	375.1	501.549	983.266	1026.31	846.623	1081.58	8015.07	1713.58	8074.86	4007.64	1182.56	2015.04	2209.04	1805.66	1302.79	1787.85	1390.38	1519.16
228	PC(19:0/16:0)	480.1	820.589	29800.1	29499.6	29641.7	29851.1	26983.4	28385.3	18564.5	38103.2	39850.3	18290.1	26143.6	19235.7	28483.3	26215.2	43774.4	17157.5	21593.7	35676.8	43159.8	33184	55823.7	74638	28251.1	62391.7	31058.1	27894	41880.6	31106.7	32008	32984.5	34727.7	32374.5	33380.1
229	PE(18:1/18:2)	423.864	740.522	53079.2	52645.8	54178.6	51533	43536.6	49941.8	30544.9	78966.5	88505.4	43089.3	62141.5	40170.7	62202.9	58296.9	79919.9	36075.2	37821.3	74142.7	80695.2	67402.8	98652.8	140615	56546.9	136199	63510.8	56905.3	87488.8	61883.5	69147	64652.8	63634	66158.9	64581.2
230	PE(P-18:0/18:1)	496.839	728.561	1.01539e+06	953166	961792	902024	897098	887288	618312	1.19823e+06	1.29316e+06	580435	840962	559591	818424	800718	900058	377041	446180	805666	986277	730555	1.16641e+06	2.52913e+06	1.06101e+06	2.31043e+06	1.14388e+06	1.00161e+06	1.48397e+06	1.20304e+06	1.07219e+06	1.11163e+06	1.11977e+06	1.11249e+06	1.13039e+06
231	PE(20:0/20:4)	479.22	794.568	12827.3	13478.8	13284.1	12776.3	10886.9	11750.2	7883.18	19837.2	19976.7	8754.08	12696.4	8754.08	12731.1	12356.8	20277	8006.08	9349.69	16154.8	20576.8	16544.4	25052.7	29543.1	12587.9	25407.9	14074.4	12442.5	18369	13416.8	16036.7	15994	15148.5	14759.8	14731.5
232	PC(O-18:2/16:0)	448.658	788.581	600891	587850	623179	618489	487140	526162	353379	442462	519921	249200	356505	257072	375863	335810	420256	174712	211365	391051	425711	328669	563632	763054	310487	726891	355147	293241	477804	347657	436314	467650	463891	459266	467273
233	PI(18:1/18:1)	366.969	861.548	167074	136673	112543	319627	125247	109307	85938.2	135142	151408	58014.3	98527.5	62501.3	103606	97488.7	85149.3	32423.9	38731.6	78882.1	65222.8	60411.9	85251.4	173417	68473.2	133149	71746	65293.5	111173	71557.2	113337	115916	115652	127770	125737
234	PC(22:0/4:0)	251.924	694.465	1339.88	1203.8	1503.17	1122.24	1059.25	1353.98	1018.81	3945.99	4647	2032.47	3478.21	3183.7	3197.02	3888.76	2508.92	1185.28	2057.84	3230.47	2533.97	2249.47	3683.77	26104.1	5297.78	31076.3	15498.3	4461.48	7428.88	8907.51	5052.8	5036.05	5161	5553.17	5546.17
235	PC(O-18:2/22:5)	500.057	862.603	2229.1	2689.71	1820.19	1989.88	1285.05	1471.77	1563.07	1890.77	2139.22	832.378	1114.51	905.303	1356.83	1960.13	2496.17	783.436	812.803	1709.12	1730.11	1143.45	2464.81	4428.28	2001.59	4561.56	1891.77	1526.23	2739.88	1939.41	1943.95	1612.23	1861.26	1683.62	1735.66
236	PC(16:0/20:5)	357.596	824.537	38662.9	16886.9	16813.2	18520.2	31510.4	15871	10883.9	37192	40559.4	17810.4	28376.2	20026.5	29505.7	32425.4	50069.8	16764.1	22836.1	42305.9	36312.2	34835.1	51796.1	82320.2	34457.5	79513.5	47908	43777.4	52121.9	40523.9	41972.6	37997	37864.1	38739.7	39713.6
237	PI(18:1/18:2)	330.579	859.53	31101.2	29770.6	29101.7	29660	25463.3	24886.5	18723.1	45106.7	41953.4	23612.9	30888.2	22943.4	37042.2	30041.9	31708.5	12018.9	16160.8	29601.8	27640	24935.5	37822.2	76920.4	31744.6	70425	31570.7	28652.9	46177.7	34090.7	34193	32523.7	31925	32785.5	32292.5
238	PE(P-16:0/24:4)	571.92	778.557	1532.37	1490.84	1333.87	1601.42	1395.64	1464.97	892.817	5779.79	6594.16	2817.55	3620.64	3909.41	3598.55	4958.75	11644.6	4147.8	5009.43	9497.18	10082.7	8320.08	14685.3	18448.8	12382.4	16199.1	9043.62	8553.32	9766.35	8954.12	6050.88	6082.38	5919.68	5670.82	9690.57
239	PG(8:0/18:1)	141.052	635.392	174.85	176.49	192.702	192.56	154.136	190.179	130.704	809.819	991.008	415.097	649.04	456.893	712.877	812.118	1115.23	449.718	623.891	1410.96	1399.73	993.404	2092.67	1318.86	611.503	1186.96	634.435	448.904	1053.86	635.837	666.638	653.392	919.139	632.113	778.675
240	PI(16:0/18:3)	294.947	831.5	1466.41	1337.02	1560.04	1826.85	1186.53	1279.12	842.517	1752.57	1660.97	819.362	1383.36	905.376	1494.92	1151.24	1592.19	675.771	862.827	1659.67	1640.1	1214.34	1788.1	3319.58	1408.67	2837.09	1830.1	1650.23	2017.32	1364.76	1853.29	1591.19	1646.26	1599.03	1822.37
241	PC(O-16:2/18:1)	409.073	786.564	76721.4	74432.4	76510.2	85249.9	66693.8	70295.7	46279.8	60086.2	67478.2	30640.6	44051.8	31041.9	48042.6	46310	56551	23015.2	30175.5	50331.8	59773.8	50797.9	72803.6	79421.9	31709.6	90435	36452.6	31133.5	47388.9	36057.1	60646.9	59348.2	55478.5	55980.5	60122
242	PC(24:0/4:0)	311.303	722.501	184980	174869	175617	175603	158322	163343	115701	146362	153854	67580.3	106735	70346.3	107128	108351	136691	53524.6	68396.5	119762	133028	106589	153156	300147	113725	296603	142861	115937	156019	135041	167529	159592	163800	173001	168152
243	PS(18:0/16:1)	367.965	760.513	178722	137796	132931	127695	131790	116182	76040.7	164499	198465	86016.3	131430	86790.5	132107	136104	95884.1	41259.9	52984.4	88183.3	81608.1	77586.6	120937	232148	104543	234708	114790	92196.4	160926	105006	126944	134363	127374	161419	156708
244	PC(25:0/4:0)	340.064	736.507	31131.8	31716.4	32545.5	32771.6	28669.6	33026.3	20583.2	35653.6	40721.3	20864	26851.9	19121.3	2131.13	27727.8	49465.9	23065.8	24944.8	44621.2	65936.5	42720	73898.6	64259.5	25822.9	61789.5	30116.6	25109	36762.2	29443.2	33774.2	32159.7	31309.6	34091.6	33007.1
245	PE(P-18:0/24:1)	596.128	812.65	1553.1	1468.62	1558.76	3155.2	1521.11	1603.6	1084.54	2446.26	2391.9	1200.16	1724.76	1156.22	1863.13	1937.92	3322.71	1425.2	356.75	3815.6	3164.68	2832.73	4168.36	6664.44	3220.72	7539.58	3461.65	3255.4	4913.34	3318.49	3087.92	2949.31	2585.05	2681.97	2459.88
246	PC(26:1/4:0)	320.274	748.517	535785	493365	519869	490529	471969	490124	319743	519183	592756	249385	373131	252498	371915	379717	409799	160389	208695	380750	426886	321433	469577	800658	319292	803046	388324	321208	509050	371804	470455	467426	492545	489341	500444
247	PC(26:2/4:0)	304.285	746.499	5350.84	4494.54	4350.69	4033.73	4428.77	4525.26	3333.72	4331.35	5699.32	1944.27	4023.73	4036.36	4253.16	3363.35	4708.21	1269.35	1653.46	2621.04	3949.07	2548.93	4369.53	7005.88	2735.49	8633.71	3856.35	2794.42	6477.71	3010.26	4214.25	4232.29	3931.68	4399.25	4653.43
248	PC(26:0/4:0)	415.622	750.533	149913	142993	151849	135884	129379	124440	72135.8	235804	263146	131566	170936	125108	195194	175948	233521	112626	111113	210246	292636	200267	324280	526767	213983	463391	242162	224512	317334	242422	198435	205501	199782	197906	203053
249	PC(P-22:0/13:0)	549.392	804.628	469.091	397.097	2832.05	318.643	281.54	2679.72	1546.98	3758.89	916.812	2161.42	3170.72	373.564	3310.34	515.937	4969.62	247.209	2583.2	543.781	4746.01	709.511	567.781	8758.46	2804.96	1137.44	3449.24	3141.84	4476.46	583.593	699.269	3099.77	830.788	493.755	618.672
250	PE(P-16:0/22:0)	565.98	758.605	2501.42	2202.06	2246.29	2197.99	1897.41	1861.26	1169.97	3349.51	3896.18	1855.11	2610.65	1815.56	2243.38	2970.09	5545.35	1506.82	1823.95	2857.35	3323.8	2656.68	7731.28	5479.21	2255.81	6018.06	3358.08	2957.53	4176.57	3069.45	3385.24	3420.77	3535.4	3190.16	3522.04
251	PE(O-18:2/24:4)	558.193	804.574	4745.43	4060.87	6608.02	4931.51	3755.2	8741.25	3130.44	5828.34	6592.52	3120.95	4737.65	3220.4	4804.37	4169.4	7578.3	2848.1	3521.93	6143.05	7183.53	5811.28	9132.55	12335.1	7333.6	10227.9	5470.38	4749.14	6843.71	5273.59	5227.58	5182.34	5489.49	5522.53	5129.2
252	PS(18:1/20:4)	306.849	808.511	16791.3	15584.8	14979.7	14513.1	14335.1	15460.9	11013.5	26742.9	26666.8	12466.4	19713.9	13109.8	20480.4	18496.3	21724.4	7294.74	10763.1	20026	16543.7	16543.2	22862.6	45141.2	19611.7	45146.7	20970.6	19626.5	27988.5	21457.5	21739.9	20905.6	21576.7	20972.1	23222.9
253	PC(P-18:0/12:0)	330.685	734.551	24006.8	24281.9	23826.7	24884.2	21633.4	23183.7	14661.8	17720.1	20199.4	12874	12042.4	8892.79	11742.9	11072.2	16799.1	5472.71	6558.06	14013.2	14304.6	11102.3	20443.7	37346.5	14430.5	29495.2	12660.5	11595.5	19776.6	16184.8	17688.1	16269	16902.7	17615	17018.7
254	PC(17:1/18:1)	405.531	816.574	202041	210101	224656	217903	187358	208775	131426	104507	114195	52015.6	77115.7	53118.1	82219.2	73557.4	107042	42686.4	50451.4	103947	110388	83892.2	135982	174319	71651.3	171861	81885.4	71515.4	110098	77950.6	131448	131330	138070	128593	133030
255	PC(P-22:0/14:1)	479.223	816.609	40728.3	41127.7	41574.9	40069.7	33545.3	37686.9	20667.6	48071	59458.3	30888.7	40228	30474.1	37966.2	40702.8	57289.3	26548.4	28947.2	54766.2	65617.3	48700	76832.1	92737.1	32024	74493.9	37274.9	35433.9	53120.7	37729.4	40728.2	41607.8	40523.2	42390.1	40485
256	PC(O-22:2/14:1)	451.327	814.594	127531	125969	129225	137430	104282	118959	71820.5	83577.4	92724.4	44863.8	63201	44576	71169.9	61005.2	86748.8	36337.5	41899.1	81001	90551	66172.5	109391	230815	52608.3	122758	59413.3	92255.5	88391.4	56514.9	87122.1	91216.7	87476	86563.2	84741
257	PI(18:0/22:1)	464.56	919.624	17818.2	15544.3	15100.6	15468	16914.5	15509.6	10781.9	22588.8	25438.1	10249.8	18299.5	11470.3	19170.1	17727.9	22519.4	8397.86	10354.1	21197.6	18728.4	17250.7	25818.7	40755.6	17628.6	42108.9	21510.4	17716.6	25629.4	18961.4	22786.3	23411.4	23693.5	22908.2	21747.5
258	PC(31:0/4:0)	514.288	820.628	10058.7	9629.14	12211.2	9853.04	8416.22	9936.1	6058.37	68170.6	73515.2	36109.2	49552.1	36414.8	50154.4	50798.1	90027.9	38288.3	41430.4	89286	106563	77730.8	132013	90697.9	35941.7	78498	40035.7	35026.6	55365.5	39614.2	57656.6	49966	44990.8	48543.2	42981.7
259	PI(16:0/20:4)	293.182	857.518	120541	106371	113118	124078	84159.5	88424.3	65431.7	531260	519000	285230	408083	270270	548378	393451	316282	112209	145879	289131	220248	220208	324313	772586	304772	622695	319758	320632	448574	321390	310472	298900	309053	321569	326509
260	PC(O-22:2/15:1)	540.106	828.598	906.41	863.105	1031.1	1051.79	793.687	961.669	683.479	1038.66	1336.46	549.461	364.317	519.113	884.973	888.791	1679.35	972.81	981.917	1986.26	2308.98	1865.77	3089.53	2482.18	1153.77	1485.96	1229.8	1113.05	1691.88	1147.36	1154.61	1045.02	1209.95	644.233	1431.55
261	PC(16:0/22:4)	409.899	854.589	23256.8	24846.1	25122.6	26551.1	20542.1	23186.8	14911.8	26918.8	29260.9	13782.3	18397.7	14070.2	21004.8	17761	36864.3	15070.8	17290.2	35204.4	36905.3	28382.5	51319.2	45406.6	20997.8	41500.6	20843.1	18264.1	30121.4	21087.2	22170.5	24304.6	25382.9	24497.2	22409.1
262	PG(16:1/16:0)	305.018	719.492	89813.9	82126.6	77192	73535.3	80153.4	87348.5	66349.7	255970	275787	118620	193630	128100	170861	211352	130234	49466.8	74630.9	125960	128960	107730	166568	293394	142345	287380	155390	153301	240152	159721	166918	158201	170454	180591	191174
263	Cer(t18:0/24:1)	588.126	710.622	10700.1	9726.49	9503.46	10517.9	8545.93	10489.2	6867.38	24025.4	23497.4	10798.3	15715.8	10313.1	11693.1	15277.8	27016	11890.7	13162.7	26982.5	31176	18864.4	37141	31297.3	14655.9	29410.8	13286.9	13505.9	19057.4	15701.2	19037.3	17348.5	16736.2	16813	18508.2
264	Cer(t14:1/27:0)	519.276	696.611	3455.58	3058.33	2752.34	2899.27	4369.9	4686.32	3051.92	6381.85	6926.22	2855.46	4440.17	2982.09	3992.41	4243.08	7645.86	3004.34	3741.48	6863.39	7826.74	5953.27	8946.41	14615.1	6502.69	12296.3	5977.74	5819.42	6626.43	6046.97	4895.47	4842.84	5322.74	5118.92	7602.36
265	PI(18:0/20:4)	367.958	885.546	18394.5	18433.9	17436.2	19131.2	14991.8	14873.3	10397.5	26418.5	27226.8	12680.7	15802.6	14227.3	20729.2	20145.9	20945.9	8283.23	9942.75	5165.93	18959.7	17231.9	26294.2	43891.1	19138.9	40678.3	19450.9	17875.5	26718.3	22261.6	19789.8	20342.3	19631.3	22329.1	22176.6
266	PE(P-16:0/20:0)	532.002	730.575	8536.02	6738.64	6878.67	7371.1	6191.64	5888.37	3707.62	12567.6	15379.6	7221.22	12017	6726.31	10101.5	11729.6	11925.3	4584.6	5557.09	8902.88	11289.8	8601.51	15121.4	25310.4	10333.9	25422.6	14750.9	14418.9	17636.6	14274	14217.6	13912.7	13122.2	13630.8	12806.7
267	Cer(t14:1/26:0)	501.687	682.596	4455.26	4159.27	3775.91	4140.57	3336.15	3353.19	2479.39	11090	10508.1	4740.86	6392.02	4223.82	6497.78	6422.69	10278.4	4255.01	4991.16	8731.43	11816.4	9658.38	14251.3	20088.7	9882.45	16249.1	8479.76	8696.36	12023.9	9719.1	8731.17	7697.46	8217.32	8504.62	7846.17
268	Cer(t14:1/26:1)	508.318	680.579	5824.27	5665.26	5412.14	6382.68	6262.11	6590.86	4991.84	12833.1	11692.6	5142.53	7844.09	5453	7782.15	7497.53	13438.6	5377.71	6630.97	12056.2	14050.1	11857.7	17068.7	22215.8	9857.95	20859.5	10092.7	8623.55	13207.4	10393.1	10580.1	10141.2	10059.8	10814.5	10624.7
269	PE(20:1/20:4)	423.005	792.546	81523.7	90065.5	89678.8	91649.2	78783	86136.7	58237.7	91907.7	96318.1	50964.1	66572.3	46556.9	73038	69332.1	99748.1	41749	45906.4	93092.8	113240	83104.9	134510	211861	89330	210356	101799	91437.8	135244	108630	93119	93362.6	94908.4	93640.2	94312.8
270	Cer(t14:0/26:0)	538.689	684.604	4030.27	3534.65	3662.06	3796.02	3935.18	3682.4	2440	23534.2	24088	11844.8	16813.4	11761.4	16765.9	17784.4	28757.6	12522.9	14379.5	26560.5	31442.5	23958.7	38239.7	98231.7	42299.8	77331.4	40862.3	40089.8	57717	44524.9	24063.9	24703	25975.8	26481.5	25598.3
271	PC(O-20:2/15:1)	502.409	800.568	1765.08	2166.92	1686.91	2508.14	1848.2	1678.33	1491.56	2935.5	3245.92	1275.69	851.438	1225.65	1840.46	1457.02	5159.49	2319.28	2266.49	4465.88	5591.69	4426.72	7159.76	5093.73	2743.1	5504	2750.22	3004.72	3797.15	3307.74	1631.86	2732.5	2496.42	2387.53	2728.46
272	LPI(20:1/0:0)	78.279	625.334	557.316	536.075	504.367	633.755	577.782	468.155	297.441	1955.6	3170.66	1028.59	1723.08	997.753	1718.47	1778.47	2353.66	1162.5	1214.93	3161.26	2029.41	1522.62	1640.5	7344.56	2167.79	3288.26	2190.8	2190.56	4335.83	2187.12	1604.84	1770.24	1833.01	2052.75	2022.26
273	PC(32:0/2:0)	536.362	806.601	4355.93	4487.48	4382.72	4197.8	4341.55	3828.51	2668.27	9508.35	9790.02	4780.11	6775.02	4368.91	6675.42	7059.32	11516.3	4346.41	5363.45	8938.18	14263.2	8956.59	13112	18812.7	7938.58	16318.6	9637.26	7783.98	10681.4	7842.16	8787.93	8925.51	7600.68	7668.7	7388.96
274	Cer(t16:1/27:0)	589.93	724.644	1363.81	1079	1258.08	1172.6	1045.06	1362.87	792.984	2664.22	1969.09	921.723	1502.52	899.123	1743.26	1592.47	2953.99	1415.84	1441.11	2079.64	3581.95	1708.26	4929.49	4664.05	1656.48	4729.28	2371.56	2080.38	2840.85	2010.76	1810.99	2101.72	2033.88	2384.21	2205.66
275	Cer(t15:1/26:1)	480.09	694.597	1086.2	1088.22	1018.42	1230.03	837.106	962.632	545.696	1124.01	1770.3	782.615	1215.39	790.541	991.438	1207.22	2062.98	820.343	799.86	1199.53	2090.16	1660.94	2593.79	3476.97	1569.67	2490.99	1371.78	1325.2	1667.41	1340.92	1321.47	1732.31	1489.64	1385.16	1449.9
276	PI(18:1/16:1)	339.8	833.515	2627.98	2964.67	2972.77	2803.63	2451.32	10595.9	1891.88	4824.15	5092.17	3061.82	6492.55	2145.82	3558.95	3494.57	6714.27	2557.5	2973.65	9667.47	9764.03	6163.84	9150.88	9634.12	4235.68	9681.88	4708.17	4167.32	6701.53	4772.38	4590.18	4763.29	4421.44	4060.22	4637.21
277	PS(18:1/22:5)	310.252	834.522	44644.6	37955.9	34404.3	36555.9	35223.7	35870.3	25327.8	62373.7	67623	27842.7	46316	30577.1	52079	42049	45957.9	16327	23939	42506.3	32651.8	35390.5	42600.1	95465.2	41866	81243.3	43899.4	44536.7	49731.8	37459.7	50123.5	47346.7	42422.2	57849.1	55642.8
278	PE(P-16:0/22:6)	423.177	746.507	21578.3	25847.5	23995.3	24831.1	18385.5	25038.3	12926.1	34994.5	34794.2	19126.9	16621.9	15231	29990.6	25652.2	30532.6	13004.5	14876.8	27417.1	24080.6	21543	35594.7	47340.1	23626.2	71590.9	18813.9	28428.9	48745.5	31496.6	27774.6	27804.4	19195.6	28886.6	27735.1
279	Cer(t18:1/24:1)	545.556	708.614	43378.1	40623.6	31949.5	40053.7	53604.1	52184.8	40918.3	32645	30819.5	10726.3	19842.1	11765	17786.2	19983.7	33615.8	14233.2	16184.2	28552.7	31814.9	27408.6	40711.4	49778.7	21200.8	42947.9	21472.4	18627	24498.3	22112.7	40390.4	37683.9	38411	38885	41239.1
280	PE(O-16:2/20:5)	304.726	718.474	451.827	370.817	370.927	423.967	305.519	401.829	227.701	2741.41	2840.43	1237.41	1966.65	1249.43	1612.8	2094.4	1260.34	443.448	615.475	1093.03	928.879	996.997	1375.36	4664.18	2355.32	4714.85	2228.83	2619.5	3805.47	3154.11	1994.16	1750.53	1679.75	1911.22	1969.93
281	Cer(t16:1/26:1)	499.381	708.612	6392.48	2905.82	2740.04	3415.07	2131.67	2517.7	1538.7	3201.07	2962.02	1498.22	2165.07	1349.95	4704.9	2110.18	3366.96	3835.85	1672.13	3047.29	4017.85	2850.06	4682.76	7414.53	3024.97	5947.79	2826.55	6982.26	3534.89	3173.44	2956.1	3013.68	3267.72	2857.06	3435.6
282	PC(P-22:0/17:1)	590.786	858.678	1512.81	1439.06	1552.74	1525.2	1409.43	1358.42	846.735	1505.45	1958.42	705.439	919.064	1059.07	2878.04	1152.88	2001.36	691.716	815.398	1310.93	1546	1297.85	2459.32	3190.2	1291.18	2880.37	1405.29	1181.47	1938.75	1555.2	1540.53	1692.28	1472.24	1451.4	1318.33
283	Cer(t14:0/23:0)	498.29	642.571	1884.68	2157.18	2388.97	2413.34	1770.97	2232.17	1426.45	3615.86	4970.99	1980.95	2494.52	5059.08	3477.5	2687.13	12601.7	1928.77	2487.27	4219.09	4671.38	6354.72	17533.7	9568.08	4053.88	9465.97	3342.6	3017.97	5189.94	5061.9	8234.74	3966.1	3744.56	4029.92	3967.71
284	PE(22:0/16:0)	546.747	774.598	939.851	1094.15	1061.65	1050.8	977.459	742.627	594.183	1660.19	2293.97	904.21	1147.28	938.219	1429.09	1638.84	2540.07	1017.84	1499.8	2273.39	2558.85	2039.39	3585.01	2694.43	1342.39	3483.67	2096.94	1852.81	2080.65	1792.66	2113.9	2016.19	1936.27	1907.95	1865.51
285	PC(O-16:2/14:1)	300.322	730.501	286.631	316.256	346.101	361.717	257.365	352.293	200.528	936.169	480.248	177.016	264.329	206.154	1796.54	283.977	450.537	218.782	239.224	856.248	598.502	408.934	703.281	4346.12	3283.47	3659.01	1985.14	1790.96	2449.44	2016.42	948.771	864.246	872.495	1681.91	929.242
286	Cer(t17:1/26:1)	560.375	722.631	2424.65	2076.7	2033.23	2122.99	2124.71	2007.81	1595.81	3630.37	3417.53	1603.78	1066.86	1507.53	2213.58	2270.7	3902.47	1663.32	1769.57	3328.79	4150.72	2961.97	5235.4	8119.45	3877.78	5501.63	2774.85	3627.36	2564.17	3320.18	2885.37	3131.11	3253.81	3325.99	3486.95
287	Cer(t18:1/27:0)	615.742	752.675	267.618	240.201	352.87	337.998	262.98	301.152	153.073	384.833	405.662	260.333	270.568	224.988	289.546	282.692	610.452	256.604	358.576	601.632	695.177	517.366	880.796	916.293	447.404	1197.02	431.531	393.397	554.514	667.189	443.499	386.615	401.985	475.902	438.597
288	Cer(t18:0/27:0)	615.79	754.69	406.468	404.625	445.525	502.3	360.452	477.592	278.417	639.003	797.797	460.673	454.749	376.165	540.764	420.849	915.243	417.882	646.015	1536.74	1175.71	895.92	1465.96	2104.06	748.253	1821.42	835.405	773.109	1214.5	1074.64	1772.8	780.865	854.039	856.016	871.538
289	PE(20:1/20:2)	485.516	796.585	43970.9	41927.6	39384.2	39633.6	38424	39539.7	31619.9	42786.2	146416	22727.6	31801.2	24307.2	31158.4	91673	43494.8	18170.9	22787.6	38392.4	45614.1	34369	54378.8	78813.4	34343.3	66971.7	38459.6	32341.7	51987.4	37571.8	41789.9	41946.3	42887.3	41035.4	42442.9
290	PI(18:0/22:4)	378.369	913.577	44578.8	44692.1	45177.7	49453.7	62004	41504.9	28381.9	56801.8	58754.5	27830.6	42059.9	28174.4	50869.5	35590.9	56645.4	21082	25110.3	51194	46181.8	38810.2	61999.6	104118	40795.6	85569.4	42099.3	35894.3	55918.1	46342.2	49071.8	83687.1	48504.7	47343.6	48838.6
291	LPC(18:0/0:0)	110.701	568.361	6200.36	5743.72	5918.63	5909.07	4943.08	4493.9	3547.87	30867.1	49606.7	15934.7	26271.5	15952.1	25447.4	24621.1	43456.9	16056.3	21211.4	44496.4	30037.9	31345.4	40648.4	151773	52347.6	109033	54714.2	50969	72357.9	54400.6	35498.6	35213.7	35048	37186.3	37635
292	PE(O-20:2/22:4)	590.796	804.573	6371.23	4712	7845.11	4632.49	3732.77	4179.76	2490.64	6346.17	6752.05	3415.23	3690.79	3235.96	5405.14	4458.03	6404.88	2953.93	3621.03	7340.21	7682.67	5542.59	9785.28	12604.9	5319.94	10553.1	6435.83	5103.29	7223.72	5425.08	5653.53	5233.24	5281.9	5267.77	5358.38
293	PI(16:0/20:3)	313.865	859.534	106336	84659.9	73998.8	78760.7	78250.2	76451.2	53041.7	221517	220986	72332.8	163208	68941.4	185091	106997	83367	29096.7	40663.4	77901.6	62568.3	59746.3	82527.9	464870	201999	256405	135993	218545	186016	130718	122306	128405	124418	133722	130802
294	Cer(t14:1/20:0)	285.265	598.507	26.8499	58.538	64.305	73.5038	62.8717	65.405	41.1196	93.4301	126.094	59.0182	58.6425	55.0328	92.9863	51.1207	110.05	75.0648	104.598	129.553	137.989	146.179	237.172	788.125	229.432	527.535	256.465	210.986	415.292	356.236	157.81	133.964	134.596	165.296	171.972
295	PI(18:0/20:3)	345.226	887.555	100195	95203.6	105274	107649	78505.5	87599.2	58166.8	247427	239391	130679	179495	120686	203268	177912	217586	79705	99916.1	201494	133018	157765	239668	397320	128476	281199	137290	173735	248931	192769	207774	217270	138595	134732	135644
296	PI(18:0/20:1)	396.704	891.585	48419.8	47189.2	46438.5	45477.4	44778.4	46113.8	31473.1	63252.6	69697.3	28268.2	44095.3	33685	56905.3	44991.6	48573.4	18314	22812.2	46447	35244.7	35240.7	52981.8	98426.2	43324	94251.9	48541.8	39478.7	63671.5	42394.8	58034.9	52230.4	56657.8	52444.4	57217.7
297	Cer(t20:0/27:0)	641.072	782.721	288.523	329.283	395.481	418.776	318.323	517.838	384.691	464.851	514.335	277.142	317.475	261.959	349.805	284.981	636.362	327.053	453.492	756.823	790.411	628.243	862.473	1045.52	453.956	1150.18	379.882	381.461	758.387	550.582	576.172	454.283	455.267	475.606	452.106
298	PE(P-18:0/20:3)	478.341	752.559	94991.2	100027	94780.1	98973.7	136055	90319.4	61045.3	156980	230886	78245.1	113108	71438.9	109034	106401	133236	56913.7	65726.5	109717	134933	138365	169158	334594	130189	275313	145388	128147	195881	144927	129319	127853	131916	132073	127196
299	Cer(t21:0/27:0)	652.149	796.736	362.558	378.218	445.005	463.647	276.926	444	264.101	493.88	460.278	234.836	289.663	279.956	318.438	277.095	619.458	244.36	487.263	648.658	810.475	727.788	855.744	1039.63	434.299	1019.9	449.249	339.373	722.95	478.814	445.597	503.583	402.463	384.225	450.355
300	PI(16:0/14:0)	304.624	781.48	1991.65	1791.13	1984.33	2762.57	1826.79	1924.08	1262.5	2813.55	3371.67	1744.95	2145.46	1498.84	2463.98	1901.07	2233.49	885.147	1030.89	2551.63	1992.84	1606.25	2851.2	5218.29	2027.89	4767.18	2124	2076.7	3049.69	2353.2	2263.3	2443.46	2289.33	2542.11	2590.55
301	Cer(t18:0/23:0)	553.491	698.613	2476.46	2525.82	2535.19	2205.31	2748.66	2625.3	2048.65	4083.42	6548.46	2925.6	4245.08	3140.09	3953.14	4412.37	7484.7	3699.29	3854.05	7526.07	7873.85	6407.83	12255.6	22337.3	10687.6	15326.8	10196.3	10442.3	13176.4	10270.9	7344.9	7643.28	6867.42	8446.92	6296.27
302	PI(18:1/16:0)	367.641	835.531	86417.3	75659.2	76310.7	73528.3	69048.7	73657.4	47703.9	195972	198259	95972.4	127388	93318.4	28851.9	138232	233036	82303.5	106512	225616	172789	156103	222863	360026	142045	313788	159377	162167	204830	157541	147522	149807	151639	146191	163361
303	PE(17:0/20:3)	447.226	754.54	7639.19	7818.71	10036.7	8728.69	6604.92	7986.89	4842.01	13098.2	11507.7	6358.26	8278.7	28430.8	8225.15	13962	14170.5	6301.69	5619.64	10021.6	13597.7	11131.7	17133.4	24058.5	17806.3	42192.8	9519.57	9626.22	11503.5	18743	10913.2	12623.2	11041.3	12108.4	9649.9
304	Cer(t22:0/27:0)	663.896	810.755	372.299	385.842	465.844	486.112	328.006	456.898	240.079	499.358	502.822	254.712	325.743	249.286	354.234	320.892	733.14	299.554	382.713	720.586	845.149	713.872	1097.33	1068.63	522.314	1177.82	432.33	438.201	669.29	567.43	471.402	438.044	472.054	372.93	409.17
305	Cer(t19:0/24:4)	527.715	718.598	1659.14	1596.99	1468.28	1634.2	1504.78	1554.4	710.536	2309.37	2581.79	1159.17	776.527	897.271	1583.69	1891.71	3002.96	1249.07	1519.62	2371.18	3093.18	2196.42	4161.83	4057.29	1841.13	4208.16	1815.43	1660.36	2430.03	1982.92	2076.44	1648.02	2101.89	2125.02	1972.65
306	PC(P-22:0/20:5)	582.387	892.64	2629.57	5564.46	3203.78	2988.84	2406.11	2947.74	1420.2	4535.59	4167.82	6341.42	2810.33	1986.78	3226.03	2884.35	5371.86	2193.27	2650.94	5169.92	5655.8	4858.39	8021.54	6924.11	3744.71	8439.39	4009.62	6798.53	5182.81	4253.2	3201.11	3301.08	3617.89	4038.24	3373.99
307	PE(O-18:2/19:0)	491.909	742.572	4002.32	3766.07	3551.84	3422	3481.73	3674.35	2572.09	5107.83	5368.32	2321.57	3403.44	2443.72	2927.38	3586.09	9466.74	3917.88	4443.66	8329.98	11380.1	6954.15	12407.6	9756.97	4036.82	8275.7	4819.77	3614.35	5772.83	4170.95	4832.23	4719.98	5002.34	4736.44	4601.86
308	PC(P-22:0/20:3)	620.539	896.68	251.275	210.812	184.577	204.525	213.061	178.362	105.471	483.404	453.316	231.738	365.046	261.758	340.485	357.064	306.916	146.096	150.443	313.909	391.043	358.486	590.249	934.26	365.84	930.31	372.482	399.342	533.932	468.051	310.703	289.416	434.483	318.454	310.112
309	PC(20:2/18:1)	462.494	856.604	8122.11	8296.77	9034.23	8637.22	7151.95	8274.76	5881.23	14306.6	15488.2	8188.82	10522.4	8522.44	11759.8	11158.8	19774.8	7254.31	9031.47	17352	18231	15401.5	25490.3	27170.8	11509.7	21533.3	11187.1	11451.8	17202.6	12024.9	12001.5	12540.8	11601.4	11451	12852.7
310	PC(18:0/22:5)	446.613	880.603	2460.88	2297.46	2318.76	2501	1921.06	2596.17	1658.05	4171.92	4456.47	2164.76	3312.14	2217.64	3236.88	2933.16	6593.36	2166.07	2892.55	5433.07	5275.12	4775.32	7883.76	18068.9	7194.49	17016.5	8114.39	7087.09	10530.2	7731.89	4455.23	4707.63	4594.45	4892.26	4360.98
311	SM(d16:1/27:0)	566.068	873.702	10241.4	9855.26	10155.8	9697.6	9871.85	9469.83	5849.03	9745.18	11762.3	5431.26	7090.38	5057.96	6584.47	7102.1	7378.07	3776.18	4368.42	6921.9	8907.54	7091.14	10434.3	19527	7444.9	13753.2	7242.81	7318.59	11009.4	8219.59	10563.7	10184.9	9503.79	10678.5	10427
312	PC(P-18:0/18:3)	437.976	812.579	5403.23	4696.73	21290.8	20473.6	16734.9	4920.94	12373.7	6709.31	7373.75	4121.41	5474.11	3484.83	5302.25	4619.62	5596.81	1991.42	2068.13	4382.7	5005.2	4806.91	6633.84	7254.48	2819.72	5689.19	2610.97	2958.47	4088.81	3082.75	5554	4789.78	4514.49	17976	4983.63
313	PC(P-22:0/20:0)	621.049	902.718	2352.03	2459.64	2224.87	2328.93	2025.1	2199.7	1447.02	1889.47	2087.31	934.136	1471.64	948.754	1326.48	1067.22	2332.37	944.306	1077.08	2129.48	2203.95	1533.13	3072.79	3880.3	1521.5	3327.35	1644.3	1498.12	1996.57	1713.39	2264.89	1690.24	1954.46	2026.15	2162.68
314	PC(O-18:2/18:3)	401.771	810.562	29628.4	32404.1	36478.9	54541.5	25405.5	29009.1	20567.6	59850.5	62058.5	36562	44754.2	31939	43383.1	44264.6	45960.6	18559.2	21721.3	37683.4	47108.2	35664.4	58224.7	47047.3	18127.9	37571.9	19124.7	18090	28337.6	21482.3	34934.8	33685.8	36076.5	35256.7	36843.1
315	PE(O-18:2/22:6)	402.339	772.529	156191	174228	213085	194493	157906	201777	113608	249637	274927	143513	193977	136382	205604	179379	244441	101850	117488	210560	300254	203003	331746	522335	206031	498649	240810	209999	306528	248904	220961	208996	217398	217339	221969
316	PC(16:1/18:2)	322.651	800.533	1955.93	2090.46	2053.82	2312.42	1967.21	1922.05	1407.64	1997.83	2508.36	1111.54	1637.07	996.459	1448.83	1354.38	1898.57	842.463	1059.46	2037.92	2311.13	1857.6	2504.29	3411.68	1237.7	3207.92	1507.1	1337.39	2086.69	1615.84	2043.61	1849.96	1827.57	2023.68	1989.03
317	PC(20:4/20:5)	319.641	872.535	6690.95	5641.39	5465.77	5892.35	7046.26	7252.65	3358.62	6558.61	9116.32	3326.18	4748.62	3087	5586.94	4691.82	4910.29	1732.59	2121.8	4277.27	5623.26	3355.67	5201.34	10557.8	4695.27	9720.46	4601.51	4430.15	9168.18	4810.26	5535.89	5228.23	5374.25	8580.02	6018.64
318	PE(15:1/22:1)	457.172	756.552	52314.4	52993.6	54529	60866.3	49340	58322	34302.1	41595.1	44051	23341.3	25692.9	22387.6	33262.1	29871.7	52137	21452.7	24318.7	47968.4	53126.8	41157	68712.2	98374.8	40279.6	100305	46599.2	39363.6	56215.5	42770.6	49129.1	47384	48348.4	47991	47218.1
319	LPE(P-18:0/0:0)	99.838	464.313	749.094	672.248	722.448	790.315	699.357	676.27	487.059	1979.69	3104.96	976.353	1419.24	884.1	1378.26	1438.78	2211.23	1089.29	1146.62	2849.08	2278.78	1939.57	3079.68	7253.11	1758.36	4129.09	2105.17	1842.2	2981.95	1316.4	1733.26	1821.65	1789.92	1707.69	1909.73
320	PI(18:1/17:1)	301.288	847.543	5209.26	4311.66	4339.62	4515.59	4145.86	3729.31	1571.2	3053.2	3310.05	1555.72	2214.1	1544.71	2456.62	2118.53	2810.62	1154.35	1486.28	2627.28	2712.19	1366	3480.38	4247.65	1696.84	4543.72	1874.63	1709.07	2934.01	2333.97	2062.59	3533	2820.71	3697.99	3692.86
321	PE(O-16:2/17:1)	367.536	684.494	498.542	533.971	638.468	611.039	579.726	597.101	359.12	677.14	929.222	433.365	559.912	393.789	661.938	607.319	935.903	397.646	479.742	743.297	1075.78	690.584	1205.35	1271.82	393.761	1237.75	593.016	659.164	744.689	650.899	655.957	652.751	678.719	725.518	651.378
322	PC(P-16:0/18:4)	325.175	782.551	1548.33	1523.29	1749.84	1749.5	1330.46	1722.97	1040.14	2151.52	2397.96	1142.69	1776.35	1119.07	1779.6	1567.62	1976.22	964.163	1035.28	2515.08	2431.25	1896.69	3133.7	27801.6	10865.2	22385.2	11668.6	11059.8	17708.8	12217.1	5909.13	5646.23	5334.54	5698.7	5559.76
323	PE(18:1/15:0)	366.811	702.497	11682.3	9599.59	9446.33	8686.04	9093.97	9405.43	6263.12	10146.8	12679.2	4960.53	7844.49	5016.58	6765.88	7594.23	8921.06	3842.49	4447.13	8436.63	10746	7370.09	11977.6	15841.9	5321.11	13149.6	6244.23	5249.32	9813.08	6717.43	8782.46	8875.5	12085.1	12386.5	9823.23
324	PC(16:0/22:6)	364.012	850.557	275072	246980	236558	261130	222606	238415	166037	408854	408230	195548	298112	197874	293976	300231	467054	164477	217731	413147	411189	350399	490577	656978	270040	556785	288219	260640	397678	282272	335858	331825	330969	322721	331001
325	PI(18:1/20:4)	298.586	883.534	559083	496973	475973	516364	413076	401915	303652	501445	491862	236951	378282	252797	427604	351991	428748	141063	197846	371817	311873	289508	404762	779976	320022	715393	362196	347591	453141	343107	453443	442813	457059	472149	486405
326	PC(15:1/16:0)	348.67	762.524	228251	105549	112442	106533	101089	103903	69993	101950	232818	51271	79818.7	110270	83656.9	156210	83456.9	32671.6	39862.2	77298.3	83733.4	62214.9	98346.6	150907	65678	169640	82039.7	59636.1	245008	72867	93899.9	210493	210646	95554.5	94947.5
327	PG(16:1/14:0)	250.45	691.454	9389.62	8316.63	8336.09	8398.87	9506.46	10457	6986.66	6723.86	7496.84	3405.03	5702.58	3978.69	5579.65	6639.38	5170.18	2200.15	3029.41	6019.36	6328.19	4992.2	8706.46	9731.48	4480.81	11675.2	5100.73	4815.35	8799.68	6060.51	8442.82	8333.96	8280.83	8733.44	8556.32
328	PI(18:0/18:1)	360.78	863.554	40380.8	35586.3	38196.9	38391.7	38035.3	38570.7	24178.4	43293.2	48187.9	20128	30174.9	21186.1	38718.9	30462	39115.5	12184.9	20438.9	40778.8	36961.4	31294.9	44895.8	93956.1	30528.1	68784.3	38652.3	25707.2	51291	29529	45871.2	39028.5	44734.1	37819.7	42756.2
329	PC(17:0/18:1)	447.602	818.589	227834	161080	162253	171251	201202	144455	99075.2	160853	228743	88103.2	158030	93317	137857	124156	239880	93467	131220	226292	235429	193646	354823	353434	148792	385353	193596	146398	206495	183131	213185	214146	219998	182284	175194
330	PE(P-16:0/16:0)	394.239	674.51	5517.43	5096.69	6065.66	5321.01	4539.44	4324.72	2854.51	3657.5	4683.37	2038.15	2955.58	2182.79	2808.8	3146.77	3996.33	1896.96	2044.16	3747.39	4662.62	3154.74	5635.62	9139.95	3739.87	8805.84	3665.08	4197.23	5467.38	3864.15	4472.76	4268.09	4578.97	4419.06	4149.04
331	PG(17:1/18:1)	335.727	759.527	5868.48	3857.57	7999.05	6935.35	6086.74	6242.7	3408.89	5975.66	7479.84	4418.51	4516.23	3895.39	5183.38	3827.1	7279.46	3270.51	2851.8	5602.6	17210.6	6883.52	22081.9	9564.01	4862.35	10929.2	3768.36	4358.38	7123.5	5704.77	4811.15	5465.1	4887.78	4547.54	4596.06
332	PE(O-18:2/17:0)	473.985	714.542	60397.9	110177	51575.2	114922	62450.2	64496.7	38237.6	75273.4	80457.1	36611.1	51880.5	32141.9	52167.7	50125.4	57753.5	28651.9	27340.6	49881.1	58464	56585.3	92074	175494	69369.1	152674	76559.5	68112.1	103318	72836.3	127350	63953.6	63878.3	66015.3	62984.3
333	PE(O-22:2/20:5)	558.024	802.559	6765.98	1217.91	1820.11	2822.3	6749.95	5588.75	630.46	11641.3	11758.7	4916.98	8206.1	2821.91	957.743	8131.88	2483.41	4137.85	768.251	1305.92	11091.6	8159.86	3000.5	19822.9	1022.5	16563.7	1058.5	8678.44	3497.19	8395.27	1951	11085.3	9599.77	9932.74	9160.76
334	SM(d20:2/22:1)	495.699	855.664	41578.9	37978.6	32414.4	43138.7	35889.4	38805.5	21114.5	35946.6	41392.2	19064	28892	19779	24692.5	24659.9	34402.4	14056.6	15226	31978.6	8310.48	24933.6	42250.2	71845.3	27633.4	50492.7	29697.6	25922.3	37215.2	30022.6	27830.4	33413.4	39651	38965.8	38386
335	PG(18:0/20:4)	360.153	797.536	8807.05	8437.11	7485.19	8952.36	6774.78	8029.68	4750.22	17646.3	20036.2	9359.37	12231.7	9012.2	11524.9	12952.3	23844.8	8902.64	10653.8	21857	20520.1	17375	27138.7	32559.9	13390.9	29322.4	15416.9	14278.4	20218.1	14676.2	15383.5	15031.3	14247.5	15311.6	14374.3
336	PE(22:0/17:1)	532.744	786.602	3709.17	3579.15	3583.94	3647.63	3086.05	3084.9	1984.52	4174.56	4525.77	2216.92	4582.78	1989.16	3159.13	3109.6	4503.53	1920.07	2126.4	4070.63	4596.63	3707.37	5560.56	12063	3521.84	7782.67	3777.99	3637.95	5298.21	3715.68	4563.94	4290.81	4312.23	4004.75	4271.98
337	PI(17:0/20:4)	319.364	871.531	11868	11584.1	10795.5	11474.6	13211.2	13645.9	6310.93	12645.4	17395.3	6342.86	9499.82	6139.7	11403.7	8890.39	8971.95	3246.24	4186.32	7797.11	6509.78	6248.18	9742.61	19453.5	11673.7	17117.9	8361.54	11922.7	12046.7	9243.26	10342.7	10505.5	10929.2	16161.4	16676.3
338	PE(22:1/17:1)	477.469	784.572	2046.78	5379.67	5715.76	2423.61	4821.54	5294.28	3562.39	8404.85	9014.11	4018.17	2152.7	3754.11	4807.08	5862.3	6840.43	2501.83	2626.71	5138.1	4803.69	4314.65	6956.9	13996.8	5317.39	9495.19	5150.23	5009.64	4395.91	4868.95	5859.53	2830.78	3715.77	2457.47	2548.79
339	PC(26:1/6:0)	418.677	776.55	49275.6	36043.9	44807.8	33072.4	44073.4	44584.2	19712.2	67884.6	83775.4	35713.3	52469.2	35838.9	44913.7	49684.9	64484.3	18588.9	26739.2	56118.1	49573.7	55235.9	84847.3	89321.5	47167.5	94262.4	48917.7	35081	55496.7	43615	41169.9	55614.5	39412.1	41222.8	58977.8
340	PI(18:0/17:1)	365.311	849.549	387290	326297	283126	333943	308498	311406	226548	519499	516435	216456	359477	236283	346780	368357	466276	153478	211064	436456	307755	326816	408284	764974	332384	637861	345017	318781	482968	326159	432634	410105	408193	396100	405108
341	PI(18:0/16:0)	337.456	837.54	236646	269793	231281	247496	242949	275418	176940	549408	519318	266683	358527	259640	395063	353435	576836	229672	269828	600893	537176	459679	708150	1.17619e+06	464019	1.01623e+06	502711	453522	630665	456410	405016	407008	397747	445092	415082
342	PE(12:0/16:0)	252.049	634.443	252.741	244.397	269.082	243.025	239.6	260.18	157.874	391.177	431.352	203.427	300.078	244.508	299.171	311.786	334.863	146.666	164.451	317.448	301.22	246.87	387.861	1931.78	510.794	1961.92	927.573	388.471	542.747	632.571	383.17	366.084	540.252	417.32	387.589
343	PE(17:2/22:1)	477.466	782.567	8751.73	9645.37	33722.7	10847.4	11418.6	29557.7	5624.54	12608.8	21458.3	9673.45	13172.4	6465.83	8670.87	16903.6	13405.8	5245.07	11036	11856.3	21588.2	9840.93	20298.4	27656.1	11223.1	24471.4	11045	18858.9	16212.2	11754.4	11560.4	10946.1	11520.2	11232.3	11807.2
344	PG(14:1/16:0)	296.778	691.455	238.104	274.11	284.926	345.88	290.343	323.274	221.698	922.158	764.484	409.402	1038.87	405.556	404.157	636.814	721.545	237.907	284.956	593.895	602.51	541.277	865.353	1744.06	764.194	1351.36	630.945	775.672	1651.38	882.339	651.652	1486.22	583.899	1563.85	768.703
345	PG(18:1/20:4)	316.884	795.518	4013.41	3511.59	3963.8	4058.37	3266.01	3394.26	2553.5	5772.61	5235.26	2730.96	4462.76	2713.01	3944.45	4189.25	5174.46	1873.42	2551.74	4172.31	4469.66	3792.78	6433.47	7454.11	2756.64	6985.35	3283.07	3081.66	4574.71	3786.35	4733.02	4476.71	4618.6	4951.71	4873.03
346	PA(18:0/16:0)	481.931	675.496	964.931	1029.37	1751.83	1760.46	863.506	1405.15	1107.22	4577.99	7054.19	3626.01	4977.65	3852.26	4184.15	5080.47	11093.7	2768.06	3573.9	2891.18	3326.89	3598.53	8624.43	28565.5	3853.12	19547.5	11394.2	23773	17933.4	9335.54	13633.7	5668.73	4230.71	5641.61	3631.48
347	PC(18:0/22:6)	413.478	878.587	18287.1	19477.1	34173.7	20330.1	15590.1	16030.2	12106.7	43276.4	51805.8	19063.9	33246.2	22967.5	36660.1	31273.1	53371.2	18890.9	22832.9	47210.3	49908.8	38742.6	59559.2	88569.7	35447.3	53868.9	46376.5	34017.4	61513.4	29433.9	38063.4	39243.4	38493	38464	36320.3
348	PG(12:0/16:1)	193.049	663.423	913.67	828.169	991.933	1131.09	1031.3	1531.13	846.929	4509.63	5293.72	2196.16	3988.79	2399.21	3292.34	3976.96	4630.59	1616.61	2123.73	4226.05	3737.58	3511.07	6708.44	5705.71	2622.17	5982.91	2783.06	2388.33	3967.84	2713.79	2842.64	3190.7	3247.29	3017.24	3110.64
349	PE(17:0/22:4)	449.484	780.557	20339.4	39170.4	41768.2	21182	17039.7	39244.9	11599.5	42723.4	23325	29597	42401.4	11810.2	17114.9	16016.6	82994.9	11966.5	13864.5	25030.8	96933.9	23640.6	38345.6	48173.2	19652.9	100299	67133.2	20859.2	30217.4	21522.9	43501.9	22586.1	56780.9	23415.9	21918
350	PE(16:1/18:2)	349.651	712.491	27737.8	24196.5	26671.5	25312.9	24159	27353.3	15157.1	39915.5	44543.1	20980.9	37342.7	19765	36564.1	27732.8	40567.7	18333.6	20642.9	38113.9	54851.6	35151.4	59583.1	55933.1	22012.7	62142.4	41951.9	21204.2	35994.5	25382.7	28475.7	30124.8	30167.7	28485.5	29040
351	PC(18:1/20:4)	363.478	852.563	27858.3	27698.8	25562	28685.8	24576.3	26455.1	17617.7	39067.6	40901.2	20166.1	28975.3	19526.6	29175.1	28121.6	48292.7	18488.1	23592	42756.5	48569.7	38133.3	55579.3	69952.4	27482.4	61230.9	30298.6	27802.5	42163.3	29016.8	34599.7	33590.8	34275.2	31890.4	32592.3
352	PC(36:0/4:0)	589.919	890.682	3085.19	2754.35	3342.89	3126.32	2628.88	2510.84	2031.52	2618.65	2989.1	1652.16	2273.18	1597.84	2484.09	2818.49	5447.48	2069.43	2707	4785.13	5264.99	4214.24	6337.3	11314.1	4341.67	10672.7	6022.26	4953.24	5731.96	5268.42	4640.87	4585.98	4531.26	4349.17	4378.27
353	PI(18:1/20:3)	320.561	885.547	89424.1	71813.2	81605.4	76178.5	67484.2	74768.6	52619.2	94674.8	88378.4	21323.9	63503.3	22544.9	82252.4	67970	35487	11689.5	36928.9	33652.3	25575.7	25334.8	81876.4	140177	51492.7	202706	91913.6	87460	86521	53057.2	83501.8	80829.1	84540.2	86102.3	82807.5
[truncated: 413 more rows]

## Sheet: Ctrl group vs Pal group
Differential changed metabolites after Pal treatment
MS2 name	VIP	P-VALUE (Ctrl vs PA)	FOLD CHANGE (Pal/Ctrl)	ion mode
[truncated: 865 more rows]

## Sheet: Pal group vs Pal+Cel group
Differential changed metabolites after Celastrol treatment
[truncated: 723 more rows]

[truncated: 4 more sheets: Pal group vs Pal+DPA-EA group, DELs co-regulated , DELs by Cel, DELs by DPA-EA]
