# Supplementary material for: Lipidome remodeling activities of DPA-EA in palmitic acid-stimulated HepG2 cells and the in vivo anti-obesity effect of the DPA-EA and DHA-EA mixture prepared from algae oil
Source: Front Pharmacol. 2023 Mar 29;14:1146276. doi: 10.3389/fphar.2023.1146276 (PMC10090563; doi:10.3389/fphar.2023.1146276)
Supplement: Supplementary file 3 [file DataSheet2.XLSX]

## Sheet: Sheet1
Full Name	Abbreviation
acetyl-CoA carboxylase	ACC
AMP-activated protein kinase	AMPK
carnitine palmitoyltransferase 1	CPT1
ceramide	Cer
cholesteryl ester	CE
diacylglycerol	DG
differential-expressed lipids	DEL
docosahexaenoic acid	DHA
docosahexaenoic acid-ethanolamine	DHA-EA
docosapentaenoic acid- ethanolamine	DPA-EA
Dulbecco’s Modified Eagle Medium	DMEM
eicosapentaenoic acid	EPA
eicosapentaenoic acid-ethanolamine	EPA-EA
endoplasmic reticulum	ER
enzyme-linked immunosorbent assay	ELISA
fold change	FC
glucosylceramide	GlcCer
Glycerides	GL
glycerophospholipids	GPs
HDL cholesterol	HDL-C
high-density lipoprotein	HDL
high-fat diet	HFD
high-performance liquid chromatography	HPLC
information-dependent basis	IDA
interleukin 10	IL 10
interleukin 13	IL 13
interleukin 4	IL 4
interleukin 6	IL-6
interleukin-1β	IL-1β
lactosylceramide	LacCer
LDL cholesterol	LDL-C
lipopolysaccharide	LPS
low-density lipoprotein	LDL
lysophosphatidic acid	LPA
lysophosphatidylcholine	LPC
lysophosphatidylethanolamines	LPE
lysophosphatidylglycerol	LPG
lysophosphatidylinositol	LPI
lysophosphatidylserine	LysoPS
monoglyceride	MG
non-alcoholic fatty liver disease	NAFLD
nonalcoholic steatohepatitis	NASH
nuclear receptor subfamily 4A	NR4A
orthogonal projections to latent structures discriminate analysis	OPLS-DA
palmitic acid	Pal
Phosphatidic acid	PA
phosphatidylcholine	PC
phosphatidylethanolamine	PE
phosphatidylglycerol	PG
phosphatidylinositol	PI
phosphatidylserine	PS
polyunsaturated fatty acid-ethanolamine	PUFA-EA
polyunsaturated fatty acids	PUFA
principal component analyses	PCA
quality control	QC
Sirtuin 1	SIRT1
sphingomyelin	SM
sphingosine	Sph
sterol regulatory element-binding transcription factor 1c	SREBF-1c
triglyceride	TG
tumor necrosis factor-alpha	TNF-
unsaturated fatty acids	UFAs
ω-3 polyunsaturated fatty acids	ω-3 PUFAs
